# Supplementary material for: Serum growth differentiation factor 15 trajectory predicts 28-day mortality in critically ill patients: a multicenter cohort study
Source: PeerJ. 2025 Nov 3;13:e20317. doi: 10.7717/peerj.20317 (PMC12591050; doi:10.7717/peerj.20317)
Supplement: Supplemental Information 11 [file peerj-13-20317-s011.xlsx]

## Sheet: data
id	Sex	Age	GDF15_D1	GDF15_D3	GDF15_D7	GDF15_load	28-day survival status	Length of ICU stay	WBC	PCT	CRP	BNP	ALT	AST	TBil	Crea	Bun	APTT	Lac	APACHE II	SOFA	Development/Validation Cohort	Postoperative group	Reasons for ICU admission	Hypertension	Diabetes	Chronic cardiac insufficiency	Chronic liver disease	Chronic renal insufficiency	Surgical site	traj_group
1	female	78	20040.3	12219.9	11640	79979.9	survival	28	17.87	0.37	20.1	915.27	14	20	16.1	63.7	5.84	28.2	4	16	4	Development Cohort	Non-postoperative group	Physical disease	Hypertension	Non-Diabetes	Non-Chronic cardiac insufficiency	Non-Chronic liver disease	Non-Chronic renal insufficiency		HP
2	male	66	20952.3	22585.6	20838.5	130386	Death	8	11.45	23.4	180.1	3903.07	26	30	52.6	294.8	40.72	22.2	3.7	29	11	Development Cohort	Non-postoperative group	Physical disease	Nonhypertension	Diabetes	Non-Chronic cardiac insufficiency	Non-Chronic liver disease	Chronic renal insufficiency		HP
3	female	76	14373.2	14303.5	9756.92	76797.7	survival	12	21.81	3.11	50.325	3199.8	11.2	17.4	23.3	34	10.31	34.5	1	11	3	Development Cohort	Non-postoperative group	Malignant tumor	Nonhypertension	Non-Diabetes	Non-Chronic cardiac insufficiency	Non-Chronic liver disease	Non-Chronic renal insufficiency		HI
4	male	68	3849.63	3869.3	5384.82	26227.2	survival	3	7.66	0.1	60.32	392.8	22.4	25.7	9	77.3	10.44	28	1.5	8	2	Development Cohort	Non-postoperative group	Severe injury	Hypertension	Non-Diabetes	Non-Chronic cardiac insufficiency	Non-Chronic liver disease	Non-Chronic renal insufficiency		MM
5	male	55	6486.19	9760.08	9405.6	54577.6	survival	17	6.45	12.17	50.325	2604.5	32.7	82.4	8.1	79.5	7.07	31.8	1.1	20	9	Development Cohort	Non-postoperative group	Physical disease	Nonhypertension	Non-Diabetes	Non-Chronic cardiac insufficiency	Non-Chronic liver disease	Non-Chronic renal insufficiency		HI
6	female	38	2584.41	5110.51	5014.76	27945.5	survival	10	9.07	1.11	60.32	3903.07	734.3	398.2	29.62	39.4	3.09	27.3	0.6	8	2	Development Cohort	Non-postoperative group	Severe injury	Nonhypertension	Non-Diabetes	Non-Chronic cardiac insufficiency	Non-Chronic liver disease	Non-Chronic renal insufficiency		MM
7	male	68	1633.1	1206.72	1281.01	7815.3	survival	19	12.46	0.15	74.08	1162.1	13.2	18.4	5.3	96.5	10.87	27.5	0.9	12	2	Development Cohort	Non-postoperative group	Severe injury	Nonhypertension	Non-Diabetes	Non-Chronic cardiac insufficiency	Non-Chronic liver disease	Non-Chronic renal insufficiency		LM
8	female	62	4385.39	4132.6	4689.15	26161.5	survival	3	5.97	0.097	60.32	53.28	42	44	14.8	55.2	8.13	27.1	0.7	17	5	Development Cohort	Non-postoperative group	Postoperative	Nonhypertension	Non-Diabetes	Non-Chronic cardiac insufficiency	Non-Chronic liver disease	Non-Chronic renal insufficiency		MM
9	male	66	2451.5	3070.95	3712.65	19089.7	survival	9	10.27	0.14	74.08	2839.8	16.7	31.6	12.5	62.6	11.26	24.7	0.6	8	2	Development Cohort	Non-postoperative group	Postoperative	Nonhypertension	Non-Diabetes	Non-Chronic cardiac insufficiency	Non-Chronic liver disease	Non-Chronic renal insufficiency		LM
10	female	39	4441.57	3145.38	4678.76	23235.2	Death	5	21.91	12.56	120	11285	22.2	64.6	16.8	46.2	5.56	33.7	1.9	24	6	Development Cohort	Non-postoperative group	Physical disease	Nonhypertension	Diabetes	Non-Chronic cardiac insufficiency	Chronic liver disease	Chronic renal insufficiency		MM
11	male	56	3038.53	3234.34	4497.96	21737.5	survival	11	8.82	0.72	60.32	113.4	19.3	25.1	1.8	97.6	10.9	29	0.6	17	4	Development Cohort	Non-postoperative group	Severe injury	Nonhypertension	Non-Diabetes	Non-Chronic cardiac insufficiency	Non-Chronic liver disease	Non-Chronic renal insufficiency		MM
12	male	71	4704.76	6805.27	10472	46064.6	Death	12	11.68	1.24	141.82	3903.07	17.1	21.8	29.62	51.9	11.55	50	0.9	27	8	Development Cohort	Non-postoperative group	Severe injury	Nonhypertension	Non-Diabetes	Non-Chronic cardiac insufficiency	Chronic liver disease	Non-Chronic renal insufficiency		HI
13	male	46	9551.42	4172.76	7683.84	37437.4	Death	12	1	2.07	196.66	4456.8	61.5	99.5	29.62	41.6	4.52	44.7	2.3	26	8	Development Cohort	Non-postoperative group	Physical disease	Nonhypertension	Diabetes	Non-Chronic cardiac insufficiency	Non-Chronic liver disease	Non-Chronic renal insufficiency		HI
14	male	32	7904.61	5707.69	4268.58	33564.8	Death	16	16.56	9.69	60.32	4716	82.1	395	1279.4	183.5	10.52	118.4	0.8	17	10	Development Cohort	Non-postoperative group	Severe injury	Nonhypertension	Non-Diabetes	Non-Chronic cardiac insufficiency	Chronic liver disease	Chronic renal insufficiency		MM
15	female	63	1503.54	1665.76	1641.26	9783.35	survival	11	7.76	0.23	74.08	5421.8	18.7	26.5	13.5	41.7	3.38	28.6	0.7	17	5	Development Cohort	Non-postoperative group	Severe injury	Nonhypertension	Non-Diabetes	Non-Chronic cardiac insufficiency	Non-Chronic liver disease	Non-Chronic renal insufficiency		LM
16	male	80	2268	2517.77	2584.41	14990.1	Death	13	5.22	0.44	74.08	4624.9	838.7	562.5	84.7	40.6	11.08	33.8	1.3	28	10	Development Cohort	Non-postoperative group	Physical disease	Nonhypertension	Non-Diabetes	Chronic cardiac insufficiency	Chronic liver disease	Non-Chronic renal insufficiency		LM
17	female	78	4032.68	4441.57	9262.55	35882.5	survival	7	10.63	0.1	50.325	1324.8	19.9	24.8	11.5	58.3	11.34	24.4	20.5	12	1	Development Cohort	Non-postoperative group	Physical disease	Nonhypertension	Non-Diabetes	Chronic cardiac insufficiency	Non-Chronic liver disease	Non-Chronic renal insufficiency		HI
18	male	63	8643.73	10024.5	14786.2	68289.7	survival	5	19.62	0.12	141.82	3599	11	15	13	120	8.2	51	1.39	16	9	Development Cohort	Non-postoperative group	Physical disease	Nonhypertension	Non-Diabetes	Non-Chronic cardiac insufficiency	Non-Chronic liver disease	Chronic renal insufficiency		HI
19	female	76	5009.45	4037.66	4147.65	25417.7	survival	7	16.66	2.92	283	1271.1	8	12	15	209	6.9	52.2	2.72	25	6	Development Cohort	Non-postoperative group	Physical disease	Nonhypertension	Non-Diabetes	Non-Chronic cardiac insufficiency	Non-Chronic liver disease	Non-Chronic renal insufficiency		MM
20	female	89	4152.67	5014.76	8829.01	36855	survival	28	6.91	2.63	55.28	23695.6	56	37	2.4	131	24.7	31.2	2.16	20	10	Development Cohort	Non-postoperative group	Physical disease	Hypertension	Diabetes	Non-Chronic cardiac insufficiency	Non-Chronic liver disease	Chronic renal insufficiency		MM
21	female	92	7129.67	7153.47	5004.15	38598.4	survival	10	20.61	11.72	154.28	6632.4	14	30	7.9	87	6.8	35	1.24	24	6	Development Cohort	Non-postoperative group	Physical disease	Nonhypertension	Non-Diabetes	Non-Chronic cardiac insufficiency	Non-Chronic liver disease	Non-Chronic renal insufficiency		MM
22	male	95	13995.6	10864.4	7183.25	60955.4	survival	19	19.03	1.97	196.66	5212.9	53	47	6.4	186	18.2	30.1	0.6	21	13	Development Cohort	Non-postoperative group	Physical disease	Hypertension	Diabetes	Non-Chronic cardiac insufficiency	Non-Chronic liver disease	Chronic renal insufficiency		HI
23	male	37	1165.19	1400.49	1440.38	8247.43	survival	14	15.57	0.19	77.2	150.2	48.3	22.3	18	94.6	7.22	29.5	0.8	23	5	Development Cohort	Non-postoperative group	Severe injury	Hypertension	Non-Diabetes	Non-Chronic cardiac insufficiency	Non-Chronic liver disease	Non-Chronic renal insufficiency		LM
24	female	52	25000	25000	25000	150000	survival	24	17.62	29.94	77.05	2444	141.9	93.5	8.4	272.5	14.25	29.5	2.6	19	10	Development Cohort	Non-postoperative group	Postoperative	Nonhypertension	Non-Diabetes	Non-Chronic cardiac insufficiency	Non-Chronic liver disease	Chronic renal insufficiency		HP
25	female	74	2145.16	2546.26	8365	26513.9	survival	10	11.44	0.238	50.325	275.1	19	32.8	7.7	41	6.7	25.2	1.9	20	5	Development Cohort	Non-postoperative group	Postoperative	Hypertension	Non-Diabetes	Non-Chronic cardiac insufficiency	Non-Chronic liver disease	Non-Chronic renal insufficiency		HI
26	male	79	4359.8	4864.02	8110.02	35171.9	survival	28	11.39	0.118	60.32	308	29.9	46.3	18.5	73.8	8.07	26.7	1.5	7	3	Development Cohort	Non-postoperative group	Physical disease	Nonhypertension	Non-Diabetes	Chronic cardiac insufficiency	Non-Chronic liver disease	Chronic renal insufficiency		MM
27	male	89	10154.5	9490.08	8282.12	55189	survival	28	3.78	0.21	50.325	95.81	36	31.2	5.1	52	7.36	39.4	2	6	9	Development Cohort	Non-postoperative group	Physical disease	Nonhypertension	Non-Diabetes	Non-Chronic cardiac insufficiency	Non-Chronic liver disease	Non-Chronic renal insufficiency		HI
28	male	46	5219.78	5073.53	4984.54	30409.5	survival	28	11.16	0.2138	60.32	3209	19	39.1	23.3	198.2	7.67	24.6	1.5	15	9	Development Cohort	Non-postoperative group	Postoperative	Hypertension	Non-Diabetes	Chronic cardiac insufficiency	Non-Chronic liver disease	Chronic renal insufficiency		MM
29	male	92	9982.32		17809		Death	19	7.14	0.422	150	7874	28.7	29.9	21.5	132.6	17.52	38.9	1.3	8	9	Development Cohort	Non-postoperative group	Physical disease	Nonhypertension	Non-Diabetes	Non-Chronic cardiac insufficiency	Non-Chronic liver disease	Chronic renal insufficiency		HI
30	male	84	11570.4	20858.5	16763.7	107673	Death	15	29.34	1.74	77.05	4739	119.5	119.9	17.2	248.8	16.55	57.7	8.2	9	12	Development Cohort	Non-postoperative group	Physical disease	Hypertension	Non-Diabetes	Non-Chronic cardiac insufficiency	Non-Chronic liver disease	Chronic renal insufficiency		HP
31	male	57	34812.6	21423.7	16094	131272	Death	12	17.09	19.34	77.05	1110	43.4	132.8	31.7	264.4	14.9	30.7	2.6	12	5	Development Cohort	Non-postoperative group	Physical disease	Nonhypertension	Diabetes	Non-Chronic cardiac insufficiency	Non-Chronic liver disease	Chronic renal insufficiency		HP
32	male	91	9147.74	15274.4	7373.24	69717.4	survival	28	11.72	0.225	90.8	1816	19.9	25.9	47.9	123.3	16.8	32.4	2.4	16	9	Development Cohort	Non-postoperative group	Physical disease	Hypertension	Non-Diabetes	Non-Chronic cardiac insufficiency	Non-Chronic liver disease	Non-Chronic renal insufficiency		HI
33	male	65	3611.66	4019.12	3479.02	22627.1	survival	11	12.56	0.634	60.32	97.19	33.3	24.2	8.1	97.8	9.16	32.6	0.7	17	3	Development Cohort	Non-postoperative group	Postoperative	Nonhypertension	Non-Diabetes	Non-Chronic cardiac insufficiency	Non-Chronic liver disease	Non-Chronic renal insufficiency		MM
34	male	69	8516	5914.24	6562.94		survival	20	4.19	0.392	60.32	184.9	41.5	89.5	40.2	51.5	7.76	30.4	1.6	20	9	Development Cohort	Non-postoperative group	Severe injury	Nonhypertension	Non-Diabetes	Non-Chronic cardiac insufficiency	Chronic liver disease	Non-Chronic renal insufficiency		MM
35	male	60	6256.76	1987.48	2029.54	16278.3	survival	7	13.54	0.047	60.32	300.2	13.2	28.4	15.1	64	3.31	24.1	0.9	21	5	Development Cohort	Non-postoperative group	Postoperative	Nonhypertension	Non-Diabetes	Non-Chronic cardiac insufficiency	Non-Chronic liver disease	Non-Chronic renal insufficiency		MM
36	female	69	16308.5	5554.88	2131.92	37237	survival	12	8.7	1.1	50.325	1510.9	32.8	42.5	6.7	36.6	8.7	29.8	1.8	15	4	Development Cohort	Non-postoperative group	Postoperative	Nonhypertension	Non-Diabetes	Non-Chronic cardiac insufficiency	Non-Chronic liver disease	Non-Chronic renal insufficiency		HI
37	male	25	1501.07		1542.09		survival	18	20.08	0.4	90	97.8	31.8	47.4	10.2	76.6	4.95	29.2	0.82	15	4	Development Cohort	Non-postoperative group	Postoperative	Nonhypertension	Non-Diabetes	Non-Chronic cardiac insufficiency	Non-Chronic liver disease	Non-Chronic renal insufficiency		LM
38	male	39	33446.8	8245.2	3427.28	65036.9	survival	11	7.84	17.43	77.05	3903.07	212.7	998.7	13.8	296.1	16.8	25	2.6	4	4	Development Cohort	Non-postoperative group	Physical disease	Nonhypertension	Non-Diabetes	Non-Chronic cardiac insufficiency	Non-Chronic liver disease	Chronic renal insufficiency		HP
39	female	56	3057.76	3701.84	2219.24	18601.8	survival	9	6.98	3.21	74.08	160.5	69.5	154.9	11.8	48.1	3.66	37.4	1.5	23	5	Development Cohort	Non-postoperative group	Postoperative	Nonhypertension	Non-Diabetes	Non-Chronic cardiac insufficiency	Non-Chronic liver disease	Non-Chronic renal insufficiency		LM
40	female	72	2294.72	7767.24	6698.86	38994.2	survival	19	34.88	10.61	90	35000	13.9	20.5	13.8	199.9	10.59	30.8	1.19	17	4	Development Cohort	Non-postoperative group	Physical disease	Nonhypertension	Non-Diabetes	Chronic cardiac insufficiency	Non-Chronic liver disease	Chronic renal insufficiency		MM
41	male	31	17695.1	10566.6	8274.8	65944.5	survival	23	21.06	0.427	50.325	28.36	669	660.8	23.2	129.5	32.82	34	1.2	25	13	Development Cohort	Non-postoperative group	Severe injury	Nonhypertension	Non-Diabetes	Non-Chronic cardiac insufficiency	Chronic liver disease	Non-Chronic renal insufficiency		HI
42	male	51	1312.03	1971.43	1649.48	10525.3	survival	14	10	19.34	74.08	3903.07	16.9	17.5	8	56.1	4.18	27.4	1.15	7	3	Development Cohort	Non-postoperative group	Physical disease	Nonhypertension	Non-Diabetes	Non-Chronic cardiac insufficiency	Non-Chronic liver disease	Non-Chronic renal insufficiency		LM
43	male	66	8178.24		8475.66		Death	19	17.82	1.43	50.325	35000	69.2	43.1	29.62	141.2	17.1	62.9	1.8	20	5	Development Cohort	Non-postoperative group	Physical disease	Nonhypertension	Non-Diabetes	Chronic cardiac insufficiency	Chronic liver disease	Chronic renal insufficiency		HI
44	male	78	21808	19658.5	15583	111949	survival	11	12.34	4.34	77.05	35000	23.9	26.6	21.1	388.7	41.19	26.9	2.1	26	12	Development Cohort	Non-postoperative group	Physical disease	Nonhypertension	Non-Diabetes	Chronic cardiac insufficiency	Non-Chronic liver disease	Chronic renal insufficiency		HP
45	male	90	5206.72	7421.74	12445.7	52363.4	survival	15	7.51	0.269	50.325	5944	10.8	17.9	8.6	223	14.51	35.2	0.4	28	6	Development Cohort	Non-postoperative group	Physical disease	Nonhypertension	Non-Diabetes	Chronic cardiac insufficiency	Non-Chronic liver disease	Chronic renal insufficiency		HI
46	female	55	5491.72	3153.58	3008.6	20969.7	survival	27	19.09	19.34	60.32	206	23.2	58.7	35.6	67	15.39	23.1	1.5	7	4	Development Cohort	Non-postoperative group	Physical disease	Nonhypertension	Non-Diabetes	Non-Chronic cardiac insufficiency	Non-Chronic liver disease	Non-Chronic renal insufficiency		MM
47	female	74	2831.54	5266.9	3544.92	25722.1	survival	17	8.61	1.6759	60.32	938.8	14.4	29.6	16.1	50	5.6	42.9	1.5	4	1	Development Cohort	Non-postoperative group	Physical disease	Nonhypertension	Non-Diabetes	Non-Chronic cardiac insufficiency	Non-Chronic liver disease	Non-Chronic renal insufficiency		MM
48	male	55	1644.04	1261.37	1602.35	8632.87	survival	13	14.36	3.5243	296	43.06	58.9	60.3	46.8	46.6	9.09	33.1	1.15	2	1	Development Cohort	Non-postoperative group	Physical disease	Nonhypertension	Non-Diabetes	Non-Chronic cardiac insufficiency	Non-Chronic liver disease	Non-Chronic renal insufficiency		LM
49	male	57	25000	3685.94	5899.51	47856.8	survival	7	10.71	1.1368	77.05	3903.07	14.1	26.9	29.62	77.9	6.74	30.3	2.6	15	4	Development Cohort	Non-postoperative group	Postoperative	Nonhypertension	Non-Diabetes	Non-Chronic cardiac insufficiency	Non-Chronic liver disease	Non-Chronic renal insufficiency		HP
50	male	38	7116.1	4821.72	1996.71	25574.7	survival	28	6.69	17.7729	60.32	937.7	26.9	25.2	19.3	115.2	19.56	31.2	1.5	7	2	Development Cohort	Non-postoperative group	Postoperative	Nonhypertension	Non-Diabetes	Non-Chronic cardiac insufficiency	Non-Chronic liver disease	Non-Chronic renal insufficiency		MM
51	female	58	12358	6999.29	9984.2	53324.3	survival	10	5.93	0.78	79.4	35000	0.8	8.3	7.3	500.2	18.12	34.1	1.8	16	6	Development Cohort	Non-postoperative group	Physical disease	Nonhypertension	Non-Diabetes	Chronic cardiac insufficiency	Non-Chronic liver disease	Non-Chronic renal insufficiency		HI
52	male	67	7453.19	6584.15	5314.48	37834.6	survival	10	10.09	19.34	52.2	156.8	95.1	121.9	29.62	37	9.69	32	1.5	12	1	Development Cohort	Non-postoperative group	Physical disease	Nonhypertension	Non-Diabetes	Chronic cardiac insufficiency	Chronic liver disease	Non-Chronic renal insufficiency		MM
53	male	53	1781.12	3197.8	3000.66	17375.8	survival	16	21.48	1.49	74.08	275.8	14.4	21.1	37.8	89.3	6.97	25.8	1.5	31	11	Development Cohort	Non-postoperative group	Severe injury	Nonhypertension	Non-Diabetes	Non-Chronic cardiac insufficiency	Chronic liver disease	Non-Chronic renal insufficiency		LM
54	male	53	2333.9	2321.58	1813.84	12926.3	survival	28	10.65	0.14	74.08	194.2	48.9	117.6	19.6	73	9.22	26.2	1.15	15	4	Development Cohort	Non-postoperative group	Postoperative	Hypertension	Non-Diabetes	Non-Chronic cardiac insufficiency	Non-Chronic liver disease	Non-Chronic renal insufficiency		LM
55	male	83	6229.1		15008.6		Death	10	9.46	0.109	50.325	4718	16.5	19.4	8.3	78.5	14.5	27.9	1.1	32	6	Development Cohort	Non-postoperative group	Physical disease	Nonhypertension	Non-Diabetes	Non-Chronic cardiac insufficiency	Non-Chronic liver disease	Non-Chronic renal insufficiency		HI
56	female	54	2237.71	3281.4	3664.05	19410	survival	11	19.52	2.07	196	3903.07	23.2	71.9	46.4	58	4.2	34.9	1.15	8	2	Development Cohort	Non-postoperative group	Physical disease	Nonhypertension	Non-Diabetes	Non-Chronic cardiac insufficiency	Non-Chronic liver disease	Non-Chronic renal insufficiency		LM
57	male	54	6792.6	6027.34	5850.62	36575.9	Death	11	11.46	1.31	60.32	1227	72.5	93.7	7.4	73.1	7.04	25.3	1.7	34	6	Development Cohort	Non-postoperative group	Postoperative	Nonhypertension	Non-Diabetes	Non-Chronic cardiac insufficiency	Chronic liver disease	Non-Chronic renal insufficiency		MM
58	male	53	1679.2	2060.52	3351.72	14564.2	Death	14	19.74	0.125	74.08	121.8	21.2	17.4	15.9	51.6	4.65	26.5	1.3	35	6	Development Cohort	Non-postoperative group	Physical disease	Nonhypertension	Diabetes	Non-Chronic cardiac insufficiency	Non-Chronic liver disease	Non-Chronic renal insufficiency		LM
59	male	54	4638.22	1533.3	16705.5	42649.1	survival	28	14.23	19.34	90	3903.07	55.8	61.2	12	115.2	6.17	25.5	2.13	15	4	Development Cohort	Non-postoperative group	Postoperative	Nonhypertension	Non-Diabetes	Non-Chronic cardiac insufficiency	Chronic liver disease	Non-Chronic renal insufficiency		HI
60	female	36	5441.24	22160.5	19216.8	110356	survival	28	38.56	5.33	37.5	29075.3	381.2	732.7	27.5	265.2	12.79	33.5	6.71	27	8	Development Cohort	Non-postoperative group	Physical disease	Nonhypertension	Non-Diabetes	Non-Chronic cardiac insufficiency	Non-Chronic liver disease	Non-Chronic renal insufficiency		HP
61	male	56	2424.3		3844.12		Death	7	13.02	0.71	60.32	37.54	24.5	28	6.5	60.8	5.34	0.93	1.5	36	5	Development Cohort	Non-postoperative group	Severe injury	Nonhypertension	Non-Diabetes	Non-Chronic cardiac insufficiency	Non-Chronic liver disease	Non-Chronic renal insufficiency		MM
62	male	68	5124	4726.4	5813.98	30931.2	survival	21	21.27	0.103	60.32	49.59	64.92	117.69	29.62	154.1	12.56	38.7	1.5	17	6	Development Cohort	Non-postoperative group	Physical disease	Nonhypertension	Non-Diabetes	Chronic cardiac insufficiency	Chronic liver disease	Non-Chronic renal insufficiency		MM
63	female	51	5124	4726.4	5813.98	30931.2	survival	15	12.13	20.55	60.32	3903.07	89.7	131.9	12.2	57.7	9.7	24.9	1.5	16	6	Development Cohort	Non-postoperative group	Physical disease	Nonhypertension	Diabetes	Non-Chronic cardiac insufficiency	Non-Chronic liver disease	Non-Chronic renal insufficiency		MM
64	male	79	11902	10561	10698.5	64982.1	survival	27	10.91	9.08	50.325	35000	22	23.5	29.62	175.1	22.17	32.6	1.8	17	9	Development Cohort	Non-postoperative group	Physical disease	Nonhypertension	Non-Diabetes	Chronic cardiac insufficiency	Chronic liver disease	Chronic renal insufficiency		HI
65	male	54	1828.75	1803.45	3427.04	14093.2	survival	11	20.68	7.26	90	807.4	17.3	21.3	7.5	50.4	5.03	29	1.15	21	8	Development Cohort	Non-postoperative group	Malignant tumor	Nonhypertension	Non-Diabetes	Non-Chronic cardiac insufficiency	Non-Chronic liver disease	Non-Chronic renal insufficiency		LM
66	female	86	3121	6071.6	4349.82	30035.4	survival	14	16.81	0.15	60.32	2243.9	5.8	10	13.5	51.7	8.83	33.3	1.5	20	11	Development Cohort	Non-postoperative group	Physical disease	Nonhypertension	Non-Diabetes	Non-Chronic cardiac insufficiency	Non-Chronic liver disease	Non-Chronic renal insufficiency		MM
67	male	34	2203.28	1951.57	1285.96	10629.9	survival	10	12.62	3.8142	74.08	533.8	12.8	18.6	51.3	60.2	4.66	38	1.15	13	4	Development Cohort	Non-postoperative group	Physical disease	Hypertension	Diabetes	Non-Chronic cardiac insufficiency	Non-Chronic liver disease	Non-Chronic renal insufficiency		LM
68	male	44	1480.43	5590.14	2639.8	23530.5	survival	21	7.02	0.073	88.7	119.1	10.9	13.4	20.4	53.8	2.48	30.2	1.5	3	1	Development Cohort	Non-postoperative group	Physical disease	Nonhypertension	Non-Diabetes	Non-Chronic cardiac insufficiency	Non-Chronic liver disease	Non-Chronic renal insufficiency		MM
69	male	54	3300.27	3776.08	2130.21	18888.9	survival	28	17.7	0.886	90	1597	5	15.8	34.8	56.7	2.96	34.2	1.15	8	2	Development Cohort	Non-postoperative group	Physical disease	Nonhypertension	Non-Diabetes	Non-Chronic cardiac insufficiency	Chronic liver disease	Non-Chronic renal insufficiency		LM
70	male	61	3911.36	4564.5	3013.14	23631.1	survival	14	11.95	1.12	60.32	69.43	32.2	44.2	11.8	81.1	3.82	26.9	2.1	39	6	Development Cohort	Non-postoperative group	Postoperative	Nonhypertension	Non-Diabetes	Non-Chronic cardiac insufficiency	Non-Chronic liver disease	Non-Chronic renal insufficiency		MM
71	female	27	8061.98	1607.86	2629.5	18144.6	survival	28	16.18	5.2338	25.1	696.4	36.4	103	10	57.4	5.33	37.8	1.7	17	9	Development Cohort	Non-postoperative group	Postoperative	Nonhypertension	Non-Diabetes	Non-Chronic cardiac insufficiency	Non-Chronic liver disease	Non-Chronic renal insufficiency		HI
72	male	73	8389.52		4389.8		survival	19	11.73	0.23	67.1	406.2	792.3	551.3	14.1	126.5	26.49	24.6	1.8	26	4	Development Cohort	Non-postoperative group	Physical disease	Nonhypertension	Non-Diabetes	Non-Chronic cardiac insufficiency	Chronic liver disease	Chronic renal insufficiency		HI
73	male	60	5314.56	9314.62	5862.74	44983.9	survival	28	15.78	0.11	0.5	561.8	71.2	328.5	9.4	102.1	4.38	42.5	1.8	15	5	Development Cohort	Non-postoperative group	Physical disease	Nonhypertension	Non-Diabetes	Chronic cardiac insufficiency	Non-Chronic liver disease	Non-Chronic renal insufficiency		HI
74	male	65	11293	4916.3	6562.32	39166.6	survival	11	4.32	0.4196	50.325	2084.9	55.5	129.8	15.2	224.5	6.99	33.1	1.8	19	5	Development Cohort	Non-postoperative group	Physical disease	Hypertension	Non-Diabetes	Chronic cardiac insufficiency	Non-Chronic liver disease	Chronic renal insufficiency		HI
75	male	56	6656.8	2346.34	2989.5	19674.8	survival	11	12.94	2.5631	60.32	47.28	62	118.2	29.62	65.1	7.73	36.5	1.5	25	5	Development Cohort	Non-postoperative group	Malignant tumor	Nonhypertension	Non-Diabetes	Non-Chronic cardiac insufficiency	Non-Chronic liver disease	Non-Chronic renal insufficiency		MM
76	male	60	3491.16	5355.7	5697.26	30952.8	survival	21	7.72	1.04	60.32	83.8	11	11.9	10.7	73.7	14.04	32.7	0.4	17	5	Development Cohort	Non-postoperative group	Physical disease	Nonhypertension	Non-Diabetes	Non-Chronic cardiac insufficiency	Non-Chronic liver disease	Non-Chronic renal insufficiency		MM
77	male	50	1655.32	1132.86	2475.92	10005.8	survival	15	15.74	0.043	69.8	135.6	64.9	25	11.3	61.1	8.09	28.2	1.15	12	4	Development Cohort	Non-postoperative group	Postoperative	Nonhypertension	Non-Diabetes	Non-Chronic cardiac insufficiency	Non-Chronic liver disease	Non-Chronic renal insufficiency		LM
78	female	66	1629.03	2486.8	2491.21	14071.8	survival	10	5.84	0.1	74.08	127.5	40.7	19.5	9.2	48.2	8.23	24.1	1.15	12	4	Development Cohort	Non-postoperative group	Postoperative	Hypertension	Non-Diabetes	Non-Chronic cardiac insufficiency	Chronic liver disease	Non-Chronic renal insufficiency		LM
79	male	71	7429.06	4657.99	4601.02	30605.1	survival	6	19.76	32.94	192	1876	44.9	47.4	11.3	68.6	7.34	29.6	1.5	5	5	Development Cohort	Non-postoperative group	Physical disease	Nonhypertension	Diabetes	Non-Chronic cardiac insufficiency	Non-Chronic liver disease	Non-Chronic renal insufficiency		MM
80	female	73	25000	25000	25000	150000	survival	14	13.08	1.22	77.05	3903.07	16.2	29	7.6	60.5	7.25	29.7	2.6	16	4	Development Cohort	Non-postoperative group	Postoperative	Nonhypertension	Non-Diabetes	Non-Chronic cardiac insufficiency	Non-Chronic liver disease	Non-Chronic renal insufficiency		HP
81	male	82	3973.92	1988.2	1551.43	13041.4	survival	9	15.87	19.02	60.32	920.5	19.4	25.2	24.2	154.3	13.52	34.5	1.5	27	11	Development Cohort	Non-postoperative group	Postoperative	Nonhypertension	Non-Diabetes	Non-Chronic cardiac insufficiency	Non-Chronic liver disease	Non-Chronic renal insufficiency		MM
82	male	88	8516	10527.9	5204.28		survival	9	41.92	100	50.325	3290	19.1	37.8	28.1	200.1	24.02	47	1.8	33	16	Development Cohort	Non-postoperative group	Malignant tumor	Nonhypertension	Non-Diabetes	Chronic cardiac insufficiency	Non-Chronic liver disease	Non-Chronic renal insufficiency		HI
83	male	28	6031.66	19084.3	13849.4	90983.4	survival	8	16.23	10.7729	223	2260	11.8	31.1	22.6	383.5	17.25	61.4	1.8	11	9	Development Cohort	Non-postoperative group	Physical disease	Nonhypertension	Non-Diabetes	Non-Chronic cardiac insufficiency	Non-Chronic liver disease	Chronic renal insufficiency		HI
84	male	18	2390.5	2765.48	2698.52	16084	survival	15	6.26	34.26	74.08	1168	12.6	38.9	15.7	80.4	6.45	43.3	1	40	6	Development Cohort	Non-postoperative group	Physical disease	Nonhypertension	Non-Diabetes	Non-Chronic cardiac insufficiency	Non-Chronic liver disease	Non-Chronic renal insufficiency		LM
85	male	36	25000	25000	25000	150000	survival	20	11.39	0.064	77.05	3903.07	36.2	20.4	29.62	65.4	5.84	29.5	2.6	15	4	Development Cohort	Non-postoperative group	Postoperative	Nonhypertension	Non-Diabetes	Non-Chronic cardiac insufficiency	Non-Chronic liver disease	Non-Chronic renal insufficiency		HP
86	female	73	25000	25000	25000	150000	Death	15	8.61	0.081	31.1	2083.3	12.5	27.9	29.62	48.2	5.56	25.1	1	24	12	Development Cohort	Non-postoperative group	Physical disease	Nonhypertension	Non-Diabetes	Chronic cardiac insufficiency	Chronic liver disease	Chronic renal insufficiency		HP
87	male	29	1506.33	2382.06	2004.72	12662	survival	12	17.4	1.19	74.08	23.23	48.8	65.6	11.2	63.1	3.68	27	7.2	42	6	Development Cohort	Non-postoperative group	Postoperative	Nonhypertension	Non-Diabetes	Non-Chronic cardiac insufficiency	Chronic liver disease	Non-Chronic renal insufficiency		LM
88	male	65	4579.38	3088.9	3533.62	20913.3	survival	11	16.16	0.038	11.1	1506	11	13.2	22.6	69.1	3.63	26.9	1.1	17	6	Development Cohort	Non-postoperative group	Physical disease	Nonhypertension	Non-Diabetes	Non-Chronic cardiac insufficiency	Non-Chronic liver disease	Non-Chronic renal insufficiency		MM
89	male	65	2928.9	5320.56	4200.96	27292.5	survival	23	10.56	0.944	60.32	72.71	35.3	62.9	16.9	62.9	5.75	28.8	2.5	16	6	Development Cohort	Non-postoperative group	Postoperative	Hypertension	Non-Diabetes	Non-Chronic cardiac insufficiency	Non-Chronic liver disease	Non-Chronic renal insufficiency		MM
90	male	87	15940.2	8180.04	5772.12	52024.5	survival	15	6.85	5.65	90	7207	13.1	43.9	3.9	224.7	33.55	22.4	1	26	9	Development Cohort	Non-postoperative group	Malignant tumor	Nonhypertension	Non-Diabetes	Non-Chronic cardiac insufficiency	Non-Chronic liver disease	Chronic renal insufficiency		HI
91	male	60	1566.69	1702.74	1404.62	9484.16	survival	28	14.31	0.28	63.4	304.3	152.7	88.9	26.3	85.1	12.86	29.6	1.3	20	5	Development Cohort	Non-postoperative group	Postoperative	Hypertension	Diabetes	Non-Chronic cardiac insufficiency	Chronic liver disease	Non-Chronic renal insufficiency		LM
92	female	68	1652.44	1419.5	996.33	7903.61	survival	28	21.52	0.104	74.08	354.1	17.8	13.9	6.7	46.2	12.38	25.5	1.15	15	4	Development Cohort	Non-postoperative group	Postoperative	Nonhypertension	Non-Diabetes	Non-Chronic cardiac insufficiency	Non-Chronic liver disease	Non-Chronic renal insufficiency		LM
93	female	69	5570.15	15570.5	16873.4	86028.7	Death	7	4.29	0.0892	81.1	410.9	12.3	29.2	11.1	42.3	7.68	31.7	1.8	7	4	Development Cohort	Non-postoperative group	Physical disease	Nonhypertension	Non-Diabetes	Non-Chronic cardiac insufficiency	Non-Chronic liver disease	Non-Chronic renal insufficiency		HI
94	male	74	17938.7	22708.9	14010.9	114087	survival	16	9.95	1.7569	48.6	12858	3720.1	4213.2	43.6	194.4	16.76	34	2.6	23	10	Development Cohort	Non-postoperative group	Malignant tumor	Nonhypertension	Non-Diabetes	Chronic cardiac insufficiency	Non-Chronic liver disease	Non-Chronic renal insufficiency		HP
95	male	79	16969.8	4754.58	3328.48	37890.5	survival	10	25.5	24.2	50.325	1516	21.5	25.4	9.7	69.2	8.02	30.5	1.1	44	8	Development Cohort	Non-postoperative group	Physical disease	Hypertension	Non-Diabetes	Non-Chronic cardiac insufficiency	Non-Chronic liver disease	Non-Chronic renal insufficiency		HI
96	male	73	25000	6381.52	5476.43	55097.4	Death	10	6.11	19.34	77.05	3903.07	23.5	66.6	29.62	237.8	12.56	27.4	2.6	30	8	Development Cohort	Non-postoperative group	Physical disease	Hypertension	Diabetes	Non-Chronic cardiac insufficiency	Non-Chronic liver disease	Non-Chronic renal insufficiency		HP
97	male	55	25000	6381.52	5476.43	55097.4	survival	11	23.58	3.2512	317.7	5377.9	2	6.9	38.1	209.1	40.05	44.7	0.9	12	10	Development Cohort	Non-postoperative group	Severe injury	Nonhypertension	Non-Diabetes	Non-Chronic cardiac insufficiency	Chronic liver disease	Chronic renal insufficiency		HP
98	female	52	2372.49	2969.32	2198.89	15678.2	survival	9	14.84	0.1262	74.08	64.45	8.5	12.5	8	42.9	4.95	31.5	1.15	12	3	Development Cohort	Non-postoperative group	Physical disease	Hypertension	Diabetes	Non-Chronic cardiac insufficiency	Non-Chronic liver disease	Non-Chronic renal insufficiency		LM
99	male	68	2244.88	4275.56	1865.89	18803.3	survival	8	8.44	0.5839	60.32	1523.4	107.8	56.7	10.3	60.9	14.01	22.5	1.5	20	4	Development Cohort	Non-postoperative group	Postoperative	Hypertension	Diabetes	Non-Chronic cardiac insufficiency	Non-Chronic liver disease	Non-Chronic renal insufficiency		MM
100	male	51	25000	6032.54	25000	93097.6	survival	28	16.8	2.4	60.6	944.6	14.6	21.9	8.4	206.2	25.67	46.1	2.6	22	10	Development Cohort	Non-postoperative group	Postoperative	Nonhypertension	Non-Diabetes	Non-Chronic cardiac insufficiency	Non-Chronic liver disease	Chronic renal insufficiency		HP
101	female	59	25000	6032.54	25000	93097.6	survival	18	10.67	19.34	77.05	3903.07	15.2	17.3	29.62	51.1	4.22	25.9	2.6	15	4	Development Cohort	Non-postoperative group	Postoperative	Hypertension	Non-Diabetes	Non-Chronic cardiac insufficiency	Non-Chronic liver disease	Non-Chronic renal insufficiency		HP
102	female	28	1931.47	1273.55	4031.34	13814.8	survival	6	20.59	0.7027	238	3903.07	24.6	32.2	21.2	32.7	1.36	20.4	1.5	6	2	Development Cohort	Non-postoperative group	Physical disease	Nonhypertension	Non-Diabetes	Non-Chronic cardiac insufficiency	Non-Chronic liver disease	Non-Chronic renal insufficiency		MM
103	male	52	5868.4		2360.74		survival	24	10	4.05	60.32	95.98	37	85.5	75.9	78.9	9.19	31.3	1.5	21	6	Development Cohort	Non-postoperative group	Physical disease	Nonhypertension	Non-Diabetes	Non-Chronic cardiac insufficiency	Non-Chronic liver disease	Chronic renal insufficiency		MM
104	male	53	4893.2	3815.26	2882.22	22103.4	survival	9	6.89	4.2055	79.4	632.7	50.7	20.3	8.9	76.1	9.05	23.5	1.5	4	1	Development Cohort	Non-postoperative group	Physical disease	Nonhypertension	Non-Diabetes	Chronic cardiac insufficiency	Chronic liver disease	Chronic renal insufficiency		MM
105	female	53	25000	25000	6730.32	113461	survival	25	15.26	25.9327	77.05	8258	65.4	92	104.5	282.1	16.82	31.2	2.6	7	11	Development Cohort	Non-postoperative group	Physical disease	Nonhypertension	Non-Diabetes	Non-Chronic cardiac insufficiency	Non-Chronic liver disease	Chronic renal insufficiency		HP
106	female	15	25000	25000	6730.32	113461	survival	12	13.94	0.123	77.05	1893	13.1	37.6	29.62	39.2	3.26	28.6	2.6	15	4	Development Cohort	Non-postoperative group	Postoperative	Nonhypertension	Non-Diabetes	Non-Chronic cardiac insufficiency	Non-Chronic liver disease	Non-Chronic renal insufficiency		HP
107	male	75	6489.58	6603	14767.4	55833.4	Death	19	11.08	0.216	50.325	306.2	20	33	6.9	93.9	9.76	30.6	2.1	49	6	Development Cohort	Non-postoperative group	Severe injury	Nonhypertension	Non-Diabetes	Chronic cardiac insufficiency	Non-Chronic liver disease	Non-Chronic renal insufficiency		HI
108	male	52	2164.49	2151.62	3982.98	16585.3	survival	17	10.97	2.2207	148	661.6	32.5	20.8	11.2	58.5	2.32	1.01	0.68	10	4	Development Cohort	Non-postoperative group	Physical disease	Nonhypertension	Non-Diabetes	Chronic cardiac insufficiency	Chronic liver disease	Chronic renal insufficiency		LM
109	male	57	2750.45	2768.54	2117.38	15290.8	survival	27	9.7	0.16	39.4	427.3	162.2	40.2	12.6	52.1	5.63	27.3	1.15	10	4	Development Cohort	Non-postoperative group	Severe injury	Nonhypertension	Non-Diabetes	Non-Chronic cardiac insufficiency	Chronic liver disease	Non-Chronic renal insufficiency		LM
110	male	51	1588.37	2669.38	4709.96	19016.4	survival	14	9.02	0.3621	0.5	3474.2	47.2	95.5	9.5	73.2	9.02	27.3	1.5	6	4	Development Cohort	Non-postoperative group	Severe injury	Nonhypertension	Non-Diabetes	Chronic cardiac insufficiency	Non-Chronic liver disease	Non-Chronic renal insufficiency		MM
111	female	65	0.8723	1.4147	1.0142	7.1448	survival	14	7.91	0.147	74.08	534.8	15.4	20.6	14.4	40.5	2.77	26.6	1.4	50	4	Development Cohort	Non-postoperative group	Severe injury	Nonhypertension	Non-Diabetes	Non-Chronic cardiac insufficiency	Non-Chronic liver disease	Non-Chronic renal insufficiency		LM
112	male	86	8951.46	7036.2	25687.7	81435.5	survival	28	18	9.21	77.05	7345	159.6	191.9	11.7	135	11.74	40.4	1.2	51	11	Development Cohort	Non-postoperative group	Physical disease	Nonhypertension	Non-Diabetes	Chronic cardiac insufficiency	Non-Chronic liver disease	Non-Chronic renal insufficiency		HP
113	male	21	1.5628	1.4934	0.6965	7.436	survival	19	6.85	0.18	74.08	11.01	10.6	20.2	13	67.8	5.95	30.3	0.9	53	5	Development Cohort	Non-postoperative group	Physical disease	Nonhypertension	Non-Diabetes	Non-Chronic cardiac insufficiency	Chronic liver disease	Non-Chronic renal insufficiency		LM
114	female	75	4597.62	10550.5	6648.26	49545.6	survival	19	60.05	2.96	50.325	12138	18.6	44.7	31.8	61.7	16.87	34.2	1.2	21	8	Development Cohort	Non-postoperative group	Physical disease	Nonhypertension	Non-Diabetes	Chronic cardiac insufficiency	Non-Chronic liver disease	Non-Chronic renal insufficiency		HI
115	male	74	4597.62	10550.5	6648.26	49545.6	survival	16	13.05	0.422	50.325	531.3	38.4	34.4	26.9	81.3	9.2	24.4	1.8	17	5	Development Cohort	Non-postoperative group	Postoperative	Hypertension	Non-Diabetes	Non-Chronic cardiac insufficiency	Non-Chronic liver disease	Non-Chronic renal insufficiency		HI
116	male	30	1071.49	1056.17	620.043	5480.08	survival	19	26.18	1.17	74.08	2697.9	38	65.9	29.62	154.1	12.56	32.3	1.15	8	4	Development Cohort	Non-postoperative group	Physical disease	Nonhypertension	Non-Diabetes	Non-Chronic cardiac insufficiency	Non-Chronic liver disease	Non-Chronic renal insufficiency		LM
117	female	98	15457.6	8061.3	17347.4	74336.3	Death	10	6.67	0.112	50.325	3094	15.4	24.8	4.8	48.4	17.23	27	1.2	27	10	Development Cohort	Non-postoperative group	Physical disease	Nonhypertension	Non-Diabetes	Chronic cardiac insufficiency	Non-Chronic liver disease	Chronic renal insufficiency		HI
118	female	55	15457.6	8061.3	17347.4	74336.3	survival	20	13.33	0.8962	50.325	3903.07	11.9	14	11	58.6	3.99	24.1	1.8	17	5	Development Cohort	Non-postoperative group	Postoperative	Nonhypertension	Diabetes	Non-Chronic cardiac insufficiency	Non-Chronic liver disease	Non-Chronic renal insufficiency		HI
119	male	59	4187.85	1822.4	2394.38	14443.8	survival	14	8.2	0.8302	10	3903.07	400	508.1	29.62	154.1	12.56	49.8	1.5	10	6	Development Cohort	Non-postoperative group	Physical disease	Hypertension	Non-Diabetes	Non-Chronic cardiac insufficiency	Non-Chronic liver disease	Non-Chronic renal insufficiency		MM
120	female	66	9472.31	14018.6	6342.61	64213.4	survival	13	1.77	0.6562	20.8	2691	72.3	246.7	3.9	86.1	4.32	42.3	1.8	13	5	Development Cohort	Non-postoperative group	Physical disease	Nonhypertension	Non-Diabetes	Chronic cardiac insufficiency	Chronic liver disease	Non-Chronic renal insufficiency		HI
121	male	70	2.134	2.4741	2.9373	15.4309	survival	23	27.85	2.7	74.08	5297	37.9	86.1	15	325.1	18.78	32.9	1.15	13	4	Development Cohort	Non-postoperative group	Physical disease	Nonhypertension	Non-Diabetes	Chronic cardiac insufficiency	Non-Chronic liver disease	Non-Chronic renal insufficiency		LM
122	male	50	1.2654		1.2834		survival	27	14.89	0.11	65.7	1970.7	13.9	43.7	18.4	60.9	4.98	30.5	2.2	15	5	Development Cohort	Non-postoperative group	Postoperative	Hypertension	Non-Diabetes	Non-Chronic cardiac insufficiency	Chronic liver disease	Non-Chronic renal insufficiency		LM
123	female	55	4.3871	3.6593	2.9456	21.2562	survival	25	6.61	81.44	74.08	35000	254.4	650.5	22	225.7	20.31	36.8	1.7	28	12	Development Cohort	Non-postoperative group	Physical disease	Nonhypertension	Non-Diabetes	Chronic cardiac insufficiency	Non-Chronic liver disease	Non-Chronic renal insufficiency		LM
124	male	56	1712.93	5475.8	2931.86	24004.1	survival	17	12.29	1.67	60.32	505.4	91.3	59.2	52.3	58.6	6.18	30.8	0.8	16	8	Development Cohort	Non-postoperative group	Postoperative	Nonhypertension	Non-Diabetes	Non-Chronic cardiac insufficiency	Non-Chronic liver disease	Non-Chronic renal insufficiency		MM
125	female	54	1712.93	5475.8	2931.86	24004.1	Death	9	8.64	19.34	60.32	3903.07	19.7	24.7	29.62	41.8	6.11	31.5	1.5	15	5	Development Cohort	Non-postoperative group	Severe injury	Nonhypertension	Non-Diabetes	Non-Chronic cardiac insufficiency	Non-Chronic liver disease	Non-Chronic renal insufficiency		MM
126	female	57	12680.5	21500.8	7616.82	92416.5	survival	21	4.43	0.16	77.05	1197.4	340.7	767	5.9	46.8	3.45	92.6	2.6	7	8	Development Cohort	Non-postoperative group	Physical disease	Nonhypertension	Non-Diabetes	Non-Chronic cardiac insufficiency	Chronic liver disease	Chronic renal insufficiency		HP
127	male	67	2.6275	2.881	2.2353	15.7411	survival	28	13.14	19.34	116	12322	9.4	14.5	13.9	499.4	14.6	33.4	1.15	12	4	Development Cohort	Non-postoperative group	Physical disease	Hypertension	Non-Diabetes	Chronic cardiac insufficiency	Non-Chronic liver disease	Non-Chronic renal insufficiency		LM
128	male	70	4227.24	13808.7	4536.9	54727.1	survival	8	4.56	100	50.325	931.4	32.4	56.8	5.8	117.1	8.93	30	6.1	7	6	Development Cohort	Non-postoperative group	Physical disease	Nonhypertension	Non-Diabetes	Non-Chronic cardiac insufficiency	Non-Chronic liver disease	Non-Chronic renal insufficiency		HI
129	male	58	5732.34		2935.69		survival	7	2.05	63.21	60.32	1703	843.5	1137.3	41.7	85.5	8.71	26.4	6.1	17	11	Development Cohort	Non-postoperative group	Physical disease	Nonhypertension	Non-Diabetes	Non-Chronic cardiac insufficiency	Non-Chronic liver disease	Non-Chronic renal insufficiency		MM
130	male	81	7474.14	8595.14	100	33459.6	survival	28	10.6	2.13	50.325	35000	6	23	10.7	244.5	32.27	34.2	0.8	20	10	Development Cohort	Non-postoperative group	Physical disease	Nonhypertension	Non-Diabetes	Chronic cardiac insufficiency	Non-Chronic liver disease	Chronic renal insufficiency		HI
131	male	78	12975.4	5512.7	7340.84	44195.1	Death	13	7.6	0.216	50.325	212.4	8.3	14.2	7.9	53.5	5.52	28.1	1	23	6	Development Cohort	Non-postoperative group	Malignant tumor	Nonhypertension	Non-Diabetes	Chronic cardiac insufficiency	Non-Chronic liver disease	Non-Chronic renal insufficiency		HI
132	male	74	5067.48	3669.23	2748.6	21572.4	survival	28	13.69	19.34	60.32	705.8	31.4	34.3	11.5	61.1	14.08	28.9	1.5	12	1	Development Cohort	Non-postoperative group	Physical disease	Nonhypertension	Non-Diabetes	Non-Chronic cardiac insufficiency	Non-Chronic liver disease	Non-Chronic renal insufficiency		MM
133	male	56	25000	25000	25000	150000	survival	22	13.98	0.568	77.05	1661.4	283	449.5	3	199.9	6.8	59.8	15	29	8	Development Cohort	Non-postoperative group	Physical disease	Nonhypertension	Non-Diabetes	Non-Chronic cardiac insufficiency	Non-Chronic liver disease	Chronic renal insufficiency		HP
134	male	48	1937.64	2179.84	3990.74	16458.6	survival	28	3.75	0.5	74.08	1138.5	86	57.6	15.3	17.7	4.1	33.8	0.5	13	3	Development Cohort	Non-postoperative group	Physical disease	Nonhypertension	Non-Diabetes	Non-Chronic cardiac insufficiency	Chronic liver disease	Non-Chronic renal insufficiency		LM
135	male	66	25000	25000	25000	150000	Death	26	10.61	16.7853	77.05	5122	30.9	59.7	236.4	326.8	31.57	69.6	2.6	12	10	Development Cohort	Non-postoperative group	Physical disease	Hypertension	Non-Diabetes	Non-Chronic cardiac insufficiency	Chronic liver disease	Chronic renal insufficiency		HP
136	male	51	3635.96	25000	5103.11	88842.2	survival	11	13.45	1.5415	77.05	3903.07	81.6	64	404.2	57	8.93	25.1	2.6	3	6	Development Cohort	Non-postoperative group	Physical disease	Nonhypertension	Non-Diabetes	Non-Chronic cardiac insufficiency	Non-Chronic liver disease	Non-Chronic renal insufficiency		HP
137	male	52	7494.01	7224.73	6686.91	42542	survival	16	24.8	19.34	60.32	17057	13.9	26.5	69.6	108.1	16.16	54.9	1.5	7	6	Development Cohort	Non-postoperative group	Physical disease	Nonhypertension	Non-Diabetes	Non-Chronic cardiac insufficiency	Non-Chronic liver disease	Non-Chronic renal insufficiency		MM
138	male	53	25000	5362.17	6503.53	54093.6	survival	15	9.29	19.34	77.05	225.7	14.6	34.3	27	11.43	6.66	34.3	2.6	16	3	Development Cohort	Non-postoperative group	Physical disease	Hypertension	Diabetes	Non-Chronic cardiac insufficiency	Non-Chronic liver disease	Non-Chronic renal insufficiency		HP
139	male	70	5818.48	2836.62	3785.86	21900.1	Death	14	1.08	1.1103	76	4081	62.2	118.2	64.8	144.4	12.34	34.1	1.5	16	8	Development Cohort	Non-postoperative group	Severe injury	Nonhypertension	Non-Diabetes	Chronic cardiac insufficiency	Chronic liver disease	Chronic renal insufficiency		MM
140	male	78	25000	25000	25000	150000	Death	15	14.87	6.65	77.05	654.6	14.5	31.9	29.62	292.7	19.16	32.9	1.3	13	5	Development Cohort	Non-postoperative group	Physical disease	Nonhypertension	Non-Diabetes	Non-Chronic cardiac insufficiency	Chronic liver disease	Chronic renal insufficiency		HP
141	male	66	4866.29	6840.73	25000	75388.5	survival	17	8.68	0.0977	77.05	517	35.1	30.8	4	43.6	5.36	31.5	2.6	16	5	Development Cohort	Non-postoperative group	Physical disease	Nonhypertension	Non-Diabetes	Non-Chronic cardiac insufficiency	Non-Chronic liver disease	Non-Chronic renal insufficiency		HP
142	male	73	4109.54	4957.78	8467.26	35917.4	survival	23	15.74	0.589	60.32	539.1	12.3	26.4	13.3	133.3	19.95	24.6	1.3	17	6	Development Cohort	Non-postoperative group	Severe injury	Nonhypertension	Non-Diabetes	Non-Chronic cardiac insufficiency	Non-Chronic liver disease	Non-Chronic renal insufficiency		MM
143	male	66	1669.58	1670.94	2137.44	10957.3	survival	28	4.45	0.046	74.08	16.57	13	16.4	7.1	57.7	3.1	28.4	1.8	15	6	Development Cohort	Non-postoperative group	Physical disease	Nonhypertension	Diabetes	Non-Chronic cardiac insufficiency	Non-Chronic liver disease	Non-Chronic renal insufficiency		LM
144	male	78	1794.46	3124.26	6179.7	23526.6	survival	21	12.02	0.409	60.32	683.4	14.9	25.8	10.5	96.2	9.3	24.6	1.6	16	6	Development Cohort	Non-postoperative group	Severe injury	Nonhypertension	Non-Diabetes	Non-Chronic cardiac insufficiency	Non-Chronic liver disease	Chronic renal insufficiency		MM
145	male	82	5947.54	5620.96	13800.1	50410.7	survival	16	23.02	0.871	50.325	2960	100.1	213.5	6.7	114	13.79	27.3	1	20	9	Development Cohort	Non-postoperative group	Physical disease	Nonhypertension	Non-Diabetes	Chronic cardiac insufficiency	Non-Chronic liver disease	Chronic renal insufficiency		HI
146	female	51	6675.54	5303.17	5364.91	33314.9	survival	13	6.39	13.3	90	2233	115.3	112.6	29.62	65.1	9.23	31.8	1.5	15	5	Development Cohort	Non-postoperative group	Postoperative	Nonhypertension	Non-Diabetes	Non-Chronic cardiac insufficiency	Non-Chronic liver disease	Non-Chronic renal insufficiency		MM
147	male	57	7549.22	3609.46	4957.38	28292.4	survival	17	15.32	15.63	60.32	7812	68.4	28.2	18.9	206.8	23.6	39.7	1.5	10	4	Development Cohort	Non-postoperative group	Physical disease	Nonhypertension	Non-Diabetes	Non-Chronic cardiac insufficiency	Non-Chronic liver disease	Non-Chronic renal insufficiency		MM
148	male	67	4683.96	4856.39	4192.88	27638.9	survival	10	9.01	0.11	49.4	75.45	13.7	14	7	105.5	4.72	24.8	1.5	7	1	Development Cohort	Non-postoperative group	Malignant tumor	Nonhypertension	Non-Diabetes	Non-Chronic cardiac insufficiency	Chronic liver disease	Non-Chronic renal insufficiency		MM
149	female	90	17483.3	19337.4	8703.86	92903.2	survival	14	5.66	0.145	77.05	18302	11.2	27	14.6	395.4	31.31	29.4	0.9	25	8	Development Cohort	Non-postoperative group	Physical disease	Nonhypertension	Non-Diabetes	Chronic cardiac insufficiency	Non-Chronic liver disease	Chronic renal insufficiency		HP
150	female	27	2564.82	1329.72	1815.71	10185.4	survival	20	9.57	0.2233	74.08	155.3	24.5	25.1	16	36.9	5.82	28.4	1.15	15	5	Development Cohort	Non-postoperative group	Physical disease	Nonhypertension	Non-Diabetes	Non-Chronic cardiac insufficiency	Non-Chronic liver disease	Non-Chronic renal insufficiency		LM
151	female	50	2160.68	2643.42	12581.1	35253.2	survival	17	12.87	0.09	50.325	82.04	27.1	24.5	13.2	30.1	3.71	23.6	1.9	15	6	Development Cohort	Non-postoperative group	Postoperative	Nonhypertension	Non-Diabetes	Non-Chronic cardiac insufficiency	Non-Chronic liver disease	Non-Chronic renal insufficiency		HI
152	female	31	5655.92	2728.8	2515.46	18873.2	survival	13	5.54	19.34	60.32	127.2	14.3	26.3	21.5	52.1	5.98	29.8	1.5	2	3	Development Cohort	Non-postoperative group	Physical disease	Nonhypertension	Diabetes	Non-Chronic cardiac insufficiency	Non-Chronic liver disease	Non-Chronic renal insufficiency		MM
153	male	75	7667.98	6086.7	7926.28	41780.6	survival	28	3.42	0.083	60.32	7959	8.2	11.2	5.6	139	14.85	34.1	0.5	15	5	Development Cohort	Non-postoperative group	Physical disease	Nonhypertension	Diabetes	Chronic cardiac insufficiency	Non-Chronic liver disease	Non-Chronic renal insufficiency		MM
154	female	78	11077	14061.3	5480	64220.9	survival	11	4.04	7.03	92.4	18243	8.9	23.1	5.7	209	26.68	40.7	1.4	20	13	Development Cohort	Non-postoperative group	Physical disease	Nonhypertension	Non-Diabetes	Chronic cardiac insufficiency	Non-Chronic liver disease	Chronic renal insufficiency		HI
155	male	78	4058.32	2017.84	7087.54	24286.9	survival	28	6.64	0.607	60.32	557.8	8.3	17.9	12.4	66	4.51	23.2	3.7	21	8	Development Cohort	Non-postoperative group	Severe injury	Nonhypertension	Non-Diabetes	Non-Chronic cardiac insufficiency	Non-Chronic liver disease	Non-Chronic renal insufficiency		MM
156	male	53	5950.02	3198.96	5396.82	26340.5	survival	28	3.39	14.01	60.32	1423	12	127.6	26.3	67.1	16	36.7	1.5	19	6	Development Cohort	Non-postoperative group	Malignant tumor	Nonhypertension	Non-Diabetes	Non-Chronic cardiac insufficiency	Non-Chronic liver disease	Non-Chronic renal insufficiency		MM
157	male	54	5001.98	3391.64	4266.62	23710.1	survival	7	16.02	6.4	60.32	857.4	17.6	13.9	9.4	46.2	7.3	36.5	1.6	9	6	Development Cohort	Non-postoperative group	Malignant tumor	Nonhypertension	Non-Diabetes	Chronic cardiac insufficiency	Non-Chronic liver disease	Non-Chronic renal insufficiency		MM
158	female	49	10224	14701.7	14943.3	84215.5	survival	18	33.36	3.73	50.325	12621	296.5	486.3	12.3	229.7	18.41	27.5	1.8	26	10	Development Cohort	Non-postoperative group	Physical disease	Nonhypertension	Diabetes	Chronic cardiac insufficiency	Non-Chronic liver disease	Chronic renal insufficiency		HI
159	female	86	7374.92	10121.7	28555.4	94850.7	survival	28	3.13	0.223	77.05	8996	10.4	22.6	14.6	45	8.36	29.3	0.7	22	10	Development Cohort	Non-postoperative group	Postoperative	Nonhypertension	Non-Diabetes	Non-Chronic cardiac insufficiency	Non-Chronic liver disease	Chronic renal insufficiency		HP
160	male	50	1.8949	5135.96	3742.44	22894.7	survival	19	13.38	0.254	60.32	4764	19	45	4.5	58.9	10.41	33.3	2.3	17	5	Development Cohort	Non-postoperative group	Physical disease	Hypertension	Non-Diabetes	Non-Chronic cardiac insufficiency	Non-Chronic liver disease	Non-Chronic renal insufficiency		MM
161	female	42	2318.3	1485.22	11952.8	30679.5	survival	11	12.75	5.069	50.325	71.1	41	60	24.5	52.1	7.34	24.5	1.5	17	9	Development Cohort	Non-postoperative group	Physical disease	Nonhypertension	Non-Diabetes	Non-Chronic cardiac insufficiency	Non-Chronic liver disease	Non-Chronic renal insufficiency		HI
162	male	80	8378.08	10278.1	11959	63130.3	survival	28	8.55	0.071	16.16	3903.07	30	36	6.4	101	10.52	37	2.8	21	5	Development Cohort	Non-postoperative group	Physical disease	Hypertension	Non-Diabetes	Chronic cardiac insufficiency	Non-Chronic liver disease	Non-Chronic renal insufficiency		HI
163	male	83	5215.22	7577.96	7244.08	42437.3	Death	25	7.72	0.351	47.72	3903.07	11	14	13.7	51	7.18	38.7	1	20	3	Development Cohort	Non-postoperative group	Physical disease	Nonhypertension	Non-Diabetes	Chronic cardiac insufficiency	Non-Chronic liver disease	Non-Chronic renal insufficiency		MM
164	male	33	4562.18	1762.65	3341.52	16533.2	Death	10	26.84	0.645	233.48	3903.07	26	28	9.3	56	5.47	30	1	20	4	Development Cohort	Non-postoperative group	Physical disease	Nonhypertension	Diabetes	Non-Chronic cardiac insufficiency	Non-Chronic liver disease	Non-Chronic renal insufficiency		MM
165	male	98	14095.4	12311.5	10891.5	72813	Death	1	13.65	0.426	31.54	3903.07	1	14	3.5	110	15.05	38.7	2.5	20	9	Development Cohort	Non-postoperative group	Physical disease	Nonhypertension	Non-Diabetes	Non-Chronic cardiac insufficiency	Non-Chronic liver disease	Non-Chronic renal insufficiency		HI
166	male	57	3318.88	4380.34	5184.56	26829	survival	8	15.1	0.03	0.5	55	22	37	17.9	48.8	8.69	18.8	0.8	20	4	Development Cohort	Non-postoperative group	Severe injury	Hypertension	Non-Diabetes	Non-Chronic cardiac insufficiency	Non-Chronic liver disease	Non-Chronic renal insufficiency		MM
167	male	80	6806.46	6786.62	16239.8	59646	Death	16	7.81	5.979	221.99	3903.07	15	32	7.2	83.6	17	35.7	0.6	11	6	Development Cohort	Non-postoperative group	Physical disease	Nonhypertension	Non-Diabetes	Non-Chronic cardiac insufficiency	Non-Chronic liver disease	Non-Chronic renal insufficiency		HI
168	female	67	2477.72	3161.3	4582.38	21126.4	survival	28	18.63	0.053	60.32	11	17	25	9.3	44.1	3.95	22.4	0.8	12	9	Development Cohort	Non-postoperative group	Physical disease	Nonhypertension	Non-Diabetes	Non-Chronic cardiac insufficiency	Non-Chronic liver disease	Non-Chronic renal insufficiency		MM
169	male	84	8560.1	14151.5	16318.8	83652.1	survival	28	9.02	0.01	50.325	448.9	10	45	6.5	327.1	15.89	22.6	1.6	21	10	Development Cohort	Non-postoperative group	Physical disease	Nonhypertension	Non-Diabetes	Chronic cardiac insufficiency	Non-Chronic liver disease	Non-Chronic renal insufficiency		HI
170	male	57	1982.89	2368.48	2194.72	13477.8	Death	8	11.6	0.053	1.61	5.6	32	45	16.3	56.3	5.57	21.6	2.32	16	5	Development Cohort	Non-postoperative group	Physical disease	Nonhypertension	Non-Diabetes	Non-Chronic cardiac insufficiency	Non-Chronic liver disease	Non-Chronic renal insufficiency		LM
171	male	34	1361.26	1246.81	1716.68	8535.05	Death	23	8.06	0.005	85.08	3903.07	17	15	11.2	55	2.07	38.7	2.5	10	6	Development Cohort	Non-postoperative group	Physical disease	Hypertension	Non-Diabetes	Non-Chronic cardiac insufficiency	Non-Chronic liver disease	Non-Chronic renal insufficiency		LM
172	male	77	6352.66	6549.86	8767.32	43536.9	survival	28	7.91	0.034	72.03	3903.07	16	54	16.3	140	5.17	38.7	0.8	12	8	Development Cohort	Non-postoperative group	Physical disease	Hypertension	Non-Diabetes	Non-Chronic cardiac insufficiency	Non-Chronic liver disease	Non-Chronic renal insufficiency		MM
173	male	64	14269.1	20678.6	11940.4	100186	survival	28	19.26	1.609	213.86	4936.3	1274	1421	15	181.8	17.1	61.8	1	24	4	Development Cohort	Non-postoperative group	Physical disease	Nonhypertension	Diabetes	Chronic cardiac insufficiency	Chronic liver disease	Chronic renal insufficiency		HP
174	male	41	1246.92	3610.5	1977.24	16032.9	Death	14	8.11	0.849	117.21	3903.07	26	42	7	46	2.96	38.7	0.5	20	5	Development Cohort	Non-postoperative group	Physical disease	Nonhypertension	Non-Diabetes	Non-Chronic cardiac insufficiency	Non-Chronic liver disease	Non-Chronic renal insufficiency		LM
175	male	50	6032.48	5601.56	2329.66	27496.5	survival	28	7.93	0.111	140.83	3903.07	87	133	18.6	71	0.96	38.7	0.8	20	6	Development Cohort	Non-postoperative group	Physical disease	Nonhypertension	Non-Diabetes	Non-Chronic cardiac insufficiency	Non-Chronic liver disease	Non-Chronic renal insufficiency		MM
176	male	73	7026.12	6282.36	20465.2	66803.5	survival	28	14.28	0.455	50.325	38.4	27	23	4.9	222.3	16.75	28.9	1.2	20	13	Development Cohort	Non-postoperative group	Physical disease	Nonhypertension	Non-Diabetes	Non-Chronic cardiac insufficiency	Non-Chronic liver disease	Chronic renal insufficiency		HI
177	male	88	15802.7	15391.6	14060	90097.4	Death	4	19.89	2.382	44.17	3903.07	13	60	24.2	186	11.72	101.4	5.9	23	18	Development Cohort	Non-postoperative group	Physical disease	Nonhypertension	Non-Diabetes	Chronic cardiac insufficiency	Non-Chronic liver disease	Chronic renal insufficiency		HI
178	male	61	2382.16	2814.74	11473.7	33773.7	Death	10	9.22	0.129	14.33	90.52	37	52	12	42	9.32	31.6	0.5	19	5	Development Cohort	Non-postoperative group	Physical disease	Hypertension	Non-Diabetes	Non-Chronic cardiac insufficiency	Non-Chronic liver disease	Non-Chronic renal insufficiency		HI
179	male	73	1669.35	1490.04	2614.34	11368.2	Death	13	8.94	0.154	24.87	3205.1	22	23	6.5	71	9.29	28.8	1.1	23	9	Development Cohort	Non-postoperative group	Physical disease	Hypertension	Non-Diabetes	Non-Chronic cardiac insufficiency	Non-Chronic liver disease	Non-Chronic renal insufficiency		LM
180	male	65	3345.26	33292.9	24213.6	151651	survival	28	12.1	0.146	101	48	44	30	11	44	12.17	35.7	0.8	16	5	Development Cohort	Non-postoperative group	Physical disease	Nonhypertension	Non-Diabetes	Non-Chronic cardiac insufficiency	Non-Chronic liver disease	Non-Chronic renal insufficiency		HP
181	male	26	3063.56	2348.22	3048.48	16205.2	survival	28	8.4	0.112	0.5	8.7	18	21	13.7	39	8.16	19.1	0.7	10	4	Development Cohort	Non-postoperative group	Physical disease	Nonhypertension	Non-Diabetes	Non-Chronic cardiac insufficiency	Non-Chronic liver disease	Non-Chronic renal insufficiency		LM
182	female	60	2982.62	2993.92	1426.66	14817.7	survival	28	13.25	0.467	62.91	907.4	28	35	10.5	57	4.68	38.7	0.1	19	3	Development Cohort	Non-postoperative group	Physical disease	Nonhypertension	Non-Diabetes	Non-Chronic cardiac insufficiency	Non-Chronic liver disease	Non-Chronic renal insufficiency		LM
183	female	77	56140.7	25502.3	8560.9	149769	Death	14	11.77	58.518	35.45	813.19	1378	1479	6.1	382	19.69	34.1	9.1	12	13	Development Cohort	Non-postoperative group	Physical disease	Hypertension	Diabetes	Chronic cardiac insufficiency	Chronic liver disease	Chronic renal insufficiency		HP
184	female	77	6966.62	8185.64	3514.92	38553.4	survival	28	9.96	0.113	2.8	2101.1	20	30	26.6	59	3.51	38.7	1.5	12	6	Development Cohort	Non-postoperative group	Physical disease	Hypertension	Non-Diabetes	Non-Chronic cardiac insufficiency	Non-Chronic liver disease	Non-Chronic renal insufficiency		HI
185	male	65	4128.14	4797.58	10484.2	39489.3	Death	11	9.97	0.182	123.6	1199.6	18	9	6.2	68	10.95	27.9	1.3	20	8	Development Cohort	Non-postoperative group	Physical disease	Nonhypertension	Non-Diabetes	Chronic cardiac insufficiency	Non-Chronic liver disease	Non-Chronic renal insufficiency		HI
186	female	57	3188.22	2719.92	2956.1	17260.2	survival	8	9.56	0.091	74.08	3903.07	14	25	14.3	39	3.07	25.2	0.8	12	4	Development Cohort	Non-postoperative group	Physical disease	Hypertension	Non-Diabetes	Non-Chronic cardiac insufficiency	Non-Chronic liver disease	Non-Chronic renal insufficiency		LM
187	male	79	8242	4679.62	4389.02	31058.9	Death	16	16.01	0.224	78.22	3903.07	24	43	9.1	83	7.69	38.7	0.2	21	6	Development Cohort	Non-postoperative group	Physical disease	Hypertension	Non-Diabetes	Non-Chronic cardiac insufficiency	Non-Chronic liver disease	Non-Chronic renal insufficiency		MM
188	female	75	1923.88	1187.8	1402.44	8292.16	survival	4	9.73	0.385	86.85	3903.07	14	21	13.9	42	2.97	38.7	1.2	20	6	Development Cohort	Non-postoperative group	Physical disease	Hypertension	Non-Diabetes	Non-Chronic cardiac insufficiency	Non-Chronic liver disease	Non-Chronic renal insufficiency		LM
189	female	72	22853.8	22694.4	19182.4	129302	survival	8	15.52	0.33	178	35000	3573.9	5434	47.6	136.1	10.1	29.4	1.7	11	8	Development Cohort	Non-postoperative group	Physical disease	Nonhypertension	Non-Diabetes	Non-Chronic cardiac insufficiency	Non-Chronic liver disease	Non-Chronic renal insufficiency		HP
190	female	60	19760.8	10577.3	12471.9	76436.7	survival	21	13.7	0.26	110.2	11422	32.7	24.6	29.4	87.5	16.4	38.2	3.5	11	4	Development Cohort	Non-postoperative group	Physical disease	Nonhypertension	Non-Diabetes	Non-Chronic cardiac insufficiency	Non-Chronic liver disease	Non-Chronic renal insufficiency		HP
191	male	63	21508.1	16441.8	14088.4	99010.4	survival	26	12.4	19.34	43.5	13672	35.7	28.5	35.9	67.9	9.6	38.5	4.5	15	6	Development Cohort	Non-postoperative group	Physical disease	Hypertension	Non-Diabetes	Non-Chronic cardiac insufficiency	Non-Chronic liver disease	Chronic renal insufficiency		HP
192	male	72	9607.72	7987.46	11513.1	56596.2	survival	24	6.9	0.1	12.8	256	37.2	23.6	22.6	53.5	2.5	31.7	3.2	6	3	Development Cohort	Non-postoperative group	Physical disease	Hypertension	Non-Diabetes	Non-Chronic cardiac insufficiency	Non-Chronic liver disease	Non-Chronic renal insufficiency		HI
193	male	38	4902.09	4281.71	11747.3	41241.7	survival	6	12.67	0.1	23.6	2894	32.6	24.5	35.8	27.9	6.8	38.5	4.5	6	3	Development Cohort	Non-postoperative group	Physical disease	Nonhypertension	Non-Diabetes	Non-Chronic cardiac insufficiency	Non-Chronic liver disease	Non-Chronic renal insufficiency		HI
194	male	68	7195.13		7609.61		survival	3	9.5	0.17	10.4	2854	36.5	24.7	33.6	46.8	8.1	32.7	3.6	6	3	Development Cohort	Non-postoperative group	Physical disease	Nonhypertension	Non-Diabetes	Non-Chronic cardiac insufficiency	Non-Chronic liver disease	Non-Chronic renal insufficiency		HI
195	male	39	6682.05	5075.95	4456.63	30823.2	survival	6	11.3	0.67	12.5	1028	33.5	24.6	36.2	67.4	8.9	37.7	3.1	8	3	Development Cohort	Non-postoperative group	Physical disease	Nonhypertension	Non-Diabetes	Non-Chronic cardiac insufficiency	Non-Chronic liver disease	Non-Chronic renal insufficiency		MM
196	female	69	8532.6	13956	22129.6	94659.6	Death	27	9.59	0.109	74.8	203.1	7.7	10.5	10	71	7.9	29.2	2.6	21	10	Development Cohort	Non-postoperative group	Physical disease	Nonhypertension	Non-Diabetes	Non-Chronic cardiac insufficiency	Non-Chronic liver disease	Non-Chronic renal insufficiency		HP
197	female	58	21123.9	20638.4	25000	133039	survival	28	20.29	5.6	29.9	184.2	113.9	686.9	52.9	48.7	5.38	38.6	2.6	21	10	Development Cohort	Non-postoperative group	Physical disease	Nonhypertension	Non-Diabetes	Non-Chronic cardiac insufficiency	Non-Chronic liver disease	Non-Chronic renal insufficiency		HP
198	female	60	12077.1	13008.6	12023.1	75149.2	survival	28	10.89	0.199	94.9	111.1	32.6	22.4	7.6	61.4	6.22	31.3	1.8	20	9	Development Cohort	Non-postoperative group	Physical disease	Nonhypertension	Non-Diabetes	Non-Chronic cardiac insufficiency	Non-Chronic liver disease	Non-Chronic renal insufficiency		HI
199	female	62	23838	25000	20884.6	140607	survival	28	5.29	1.45	77.05	266.9	18.4	25.5	22.7	37.7	7.55	22.3	2.6	18	10	Development Cohort	Non-postoperative group	Physical disease	Nonhypertension	Non-Diabetes	Non-Chronic cardiac insufficiency	Non-Chronic liver disease	Non-Chronic renal insufficiency		HP
200	female	50	8516	25000	25000		Death	11	6.7	3.74	80.7	14249	41.3	59.3	18.6	90.1	16.19	37.7	2.6	18	10	Development Cohort	Non-postoperative group	Physical disease	Nonhypertension	Non-Diabetes	Non-Chronic cardiac insufficiency	Non-Chronic liver disease	Non-Chronic renal insufficiency		HP
201	male	31	17846.5	16696.2	15010.3	97955.6	survival	28	13.44	0.173	77.05	165.3	328.7	177.7	11.8	75	14.65	23.5	2.6	18	10	Development Cohort	Non-postoperative group	Physical disease	Nonhypertension	Non-Diabetes	Non-Chronic cardiac insufficiency	Non-Chronic liver disease	Non-Chronic renal insufficiency		HP
202	male	78	9054.99	12830.1	19481.2	86507.5	survival	28	18.19	0.978	65.9	1453	17.3	30.8	8.5	100.7	18.78	31.1	1.8	20	9	Development Cohort	Non-postoperative group	Physical disease	Nonhypertension	Non-Diabetes	Non-Chronic cardiac insufficiency	Non-Chronic liver disease	Non-Chronic renal insufficiency		HI
203	male	58	9560.16	11714.4	21295.8	87294.8	survival	28	18.19	0.978	65.9	1453	17.3	30.8	8.5	100.7	18.78	31.1	1.8	20	9	Development Cohort	Non-postoperative group	Physical disease	Nonhypertension	Non-Diabetes	Non-Chronic cardiac insufficiency	Non-Chronic liver disease	Non-Chronic renal insufficiency		HI
204	female	12	3536.19	4497.21	11537.5	40102.9	survival	28	6.49	0.144	13.8	1171	17.7	17.5	7.1	68.6	6.5	23.8	1.8	20	9	Development Cohort	Non-postoperative group	Severe injury	Nonhypertension	Non-Diabetes	Non-Chronic cardiac insufficiency	Non-Chronic liver disease	Non-Chronic renal insufficiency		HI
205	male	58	25000	21995.3	12785.7	116557	survival	28	11.89	9.6	390	896	153.3	119.3	36	78.6	9.51	32.3	2.6	21	10	Development Cohort	Non-postoperative group	Severe injury	Nonhypertension	Non-Diabetes	Non-Chronic cardiac insufficiency	Non-Chronic liver disease	Non-Chronic renal insufficiency		HP
206	male	66	4015.65	3880.05	100	15855.8	survival	28	12.54	0.18	60.32	440.3	15.2	17.6	23.4	57.5	3.81	28.3	1.5	17	6	Development Cohort	Non-postoperative group	Severe injury	Nonhypertension	Non-Diabetes	Non-Chronic cardiac insufficiency	Non-Chronic liver disease	Non-Chronic renal insufficiency		MM
207	male	18	25000	25000	25000	150000	survival	28	3.73	7.45	127	169.3	61.4	49	9.6	80.3	7.19	28.6	2.6	21	12	Development Cohort	Non-postoperative group	Severe injury	Nonhypertension	Non-Diabetes	Non-Chronic cardiac insufficiency	Non-Chronic liver disease	Non-Chronic renal insufficiency		HP
208	female	54	25000	25000	19631	139262	survival	28	2.19	2.59	53.2	925.9	5.3	15.3	27.7	48.9	6.13	59.9	2.6	21	13	Development Cohort	Non-postoperative group	Severe injury	Nonhypertension	Non-Diabetes	Non-Chronic cardiac insufficiency	Non-Chronic liver disease	Non-Chronic renal insufficiency		HP
209	male	69	14126.3	6186.12	6364.77	45414.2	survival	28	13.26	0.351	82.8	45.54	13.6	15.3	13.1	79	6.54	27.7	1.8	20	9	Development Cohort	Non-postoperative group	Severe injury	Nonhypertension	Non-Diabetes	Non-Chronic cardiac insufficiency	Non-Chronic liver disease	Non-Chronic renal insufficiency		HI
210	female	85	25000	25000	25000	150000	Death	15	4.3	7.96	389	953.1	25.2	45.4	12.7	46.6	6.16	39.8	2.6	23	15	Development Cohort	Non-postoperative group	Severe injury	Nonhypertension	Non-Diabetes	Non-Chronic cardiac insufficiency	Non-Chronic liver disease	Non-Chronic renal insufficiency		HP
211	male	50	25000	25000	25000	150000	survival	28	7.15	0.962	98.5	432.5	247.9	245.7	23.8	77.1	9.98	28.9	2.6	25	16	Development Cohort	Non-postoperative group	Severe injury	Nonhypertension	Non-Diabetes	Non-Chronic cardiac insufficiency	Non-Chronic liver disease	Non-Chronic renal insufficiency		HP
212	male	63	6773.58	7206.69	5940.42	40274.5	survival	28	10.03	0.039	60.32	428.4	23	31.1	27.7	46.6	7.37	25.8	1.5	17	6	Development Cohort	Non-postoperative group	Physical disease	Nonhypertension	Non-Diabetes	Non-Chronic cardiac insufficiency	Non-Chronic liver disease	Non-Chronic renal insufficiency		MM
213	female	65	23748.7	25000	25000	148749	Death	21	6.79	0.08	22.4	594.6	16.5	34.6	18.7	87.6	7	24	2.6	27	18	Development Cohort	Non-postoperative group	Physical disease	Nonhypertension	Non-Diabetes	Non-Chronic cardiac insufficiency	Non-Chronic liver disease	Non-Chronic renal insufficiency		HP
214	male	62	14064.9	25000	20735.8	130537	Death	17	5.3	0.225	77.05	987.7	28.8	29.3	23.8	82.1	6.57	28.2	2.6	21	17	Development Cohort	Non-postoperative group	Physical disease	Nonhypertension	Non-Diabetes	Non-Chronic cardiac insufficiency	Non-Chronic liver disease	Non-Chronic renal insufficiency		HP
215	male	41	25000	25000	25000	150000	Death	19	10.53	29.79	77.05	35000	49.2	183.6	11	288.3	24.1	36.6	2.6	20	16	Development Cohort	Non-postoperative group	Physical disease	Nonhypertension	Non-Diabetes	Non-Chronic cardiac insufficiency	Non-Chronic liver disease	Non-Chronic renal insufficiency		HP
216	male	47	9993.81	8489.19	25000	85461.4	Death	19	12.75	0.139	77.05	45.67	37.6	33	20	40.4	10.01	27.4	2.6	16	13	Development Cohort	Non-postoperative group	Physical disease	Nonhypertension	Non-Diabetes	Non-Chronic cardiac insufficiency	Non-Chronic liver disease	Non-Chronic renal insufficiency		HP
217	female	67	14355.1	12707.7	18475.3	89428.7	survival	28	12.48	0.087	50.325	206.8	29.1	43.2	12.1	69	8.51	26.8	1.8	20	9	Development Cohort	Non-postoperative group	Physical disease	Nonhypertension	Non-Diabetes	Non-Chronic cardiac insufficiency	Non-Chronic liver disease	Non-Chronic renal insufficiency		HI
218	male	32	25000	25000	25000	150000	survival	28	19.37	1.04	77.05	230	25.4	38.5	16.2	58.8	2.44	28.9	2.6	21	14	Development Cohort	Non-postoperative group	Physical disease	Nonhypertension	Non-Diabetes	Non-Chronic cardiac insufficiency	Non-Chronic liver disease	Non-Chronic renal insufficiency		HP
219	male	75	15243.3	8836.95	11927.3	65608.7	survival	28	5.7	1.91	50.325	490.7	22.9	35.7	29.3	54.6	7.74	29.2	1.8	20	9	Development Cohort	Non-postoperative group	Physical disease	Nonhypertension	Non-Diabetes	Non-Chronic cardiac insufficiency	Non-Chronic liver disease	Non-Chronic renal insufficiency		HI
220	female	37	10094.7	10059.2	11319.7	62911.7	survival	28	9.38	0.048	11.7	81.08	51.3	22.1	11.5	42.2	8.13	24.7	1.8	20	9	Development Cohort	Non-postoperative group	Physical disease	Nonhypertension	Non-Diabetes	Non-Chronic cardiac insufficiency	Non-Chronic liver disease	Non-Chronic renal insufficiency		HI
221	female	15	12316.3	6606.15	11439.7	55014.2	survival	28	8.68	0.065	50.325	66.4	22.3	20.3	17.3	43.1	7.22	25.7	1.8	20	9	Development Cohort	Non-postoperative group	Physical disease	Nonhypertension	Non-Diabetes	Non-Chronic cardiac insufficiency	Non-Chronic liver disease	Non-Chronic renal insufficiency		HI
222	male	21	25000	25000	25000	150000	survival	28	13.26	25.31	246	7767	238	1798.1	37.5	184.4	26.82	34.9	2.6	27	6	Development Cohort	Non-postoperative group	Physical disease	Nonhypertension	Non-Diabetes	Non-Chronic cardiac insufficiency	Non-Chronic liver disease	Non-Chronic renal insufficiency		HP
223	male	76	6179.82	12499.4	7941.72	59561.5	survival	28	6.36	0.673	50.325	67.94	21.9	26	11.5	56	10.09	25.3	1.8	20	9	Development Cohort	Non-postoperative group	Physical disease	Nonhypertension	Non-Diabetes	Non-Chronic cardiac insufficiency	Non-Chronic liver disease	Non-Chronic renal insufficiency		HI
224	male	49	7108.95	12277	5621.04	55182.1	survival	28	11.84	0.054	50.325	89.12	17.5	18.7	35.4	71.3	5.67	26.4	1.8	20	9	Development Cohort	Non-postoperative group	Physical disease	Nonhypertension	Non-Diabetes	Non-Chronic cardiac insufficiency	Non-Chronic liver disease	Non-Chronic renal insufficiency		HI
225	male	76	10810.9	9400.71	20757.2	80527.4	Death	11	16.16	0.058	2.71	118.1	16.8	31.9	14.8	59.5	4.9	26.5	1.8	20	9	Development Cohort	Non-postoperative group	Physical disease	Nonhypertension	Non-Diabetes	Non-Chronic cardiac insufficiency	Non-Chronic liver disease	Non-Chronic renal insufficiency		HI
226	female	74	13091.3	21068.9	20309.5	116917	survival	28	8.79	0.47	77.05	804.8	21.1	15.1	12	46.8	8.37	27.5	2.6	19	15	Development Cohort	Non-postoperative group	Physical disease	Nonhypertension	Non-Diabetes	Non-Chronic cardiac insufficiency	Non-Chronic liver disease	Non-Chronic renal insufficiency		HP
227	male	86	14012.9	11245.4	13989.8	75728.5	survival	28	5.65	0.1	97.13	618.8	47.5	42	23	65.1	9.21	27.8	1.8	20	9	Development Cohort	Non-postoperative group	Physical disease	Nonhypertension	Non-Diabetes	Non-Chronic cardiac insufficiency	Non-Chronic liver disease	Non-Chronic renal insufficiency		HI
228	male	58	25000	25000	23945.4	147891	Death	20	9.31	0.562	77.05	301.1	18	45.4	7.9	115.5	22.27	22.3	2.6	29	13	Development Cohort	Non-postoperative group	Physical disease	Nonhypertension	Non-Diabetes	Non-Chronic cardiac insufficiency	Non-Chronic liver disease	Non-Chronic renal insufficiency		HP
229	male	52	25000	100	25000	75300	Death	9	10.39	62.17	77.05	1233	20.9	67.5	11.2	100.1	5.59	25.4	2.6	28	12	Development Cohort	Non-postoperative group	Physical disease	Nonhypertension	Non-Diabetes	Non-Chronic cardiac insufficiency	Non-Chronic liver disease	Non-Chronic renal insufficiency		HP
230	male	52	14183	7238.16	10340.1	56577.6	survival	28	13.48	0.108	69	10	33.6	23.2	20.1	60.2	7.28	24	1.8	20	9	Development Cohort	Non-postoperative group	Physical disease	Nonhypertension	Non-Diabetes	Non-Chronic cardiac insufficiency	Chronic liver disease	Non-Chronic renal insufficiency		HI
231	female	75	18290.2	17897.2	25000	121982	survival	28	13.36	0.156	77.05	866.7	24.7	21.2	11.1	48.5	4.18	27.8	2.6	27	10	Development Cohort	Non-postoperative group	Physical disease	Nonhypertension	Non-Diabetes	Non-Chronic cardiac insufficiency	Non-Chronic liver disease	Non-Chronic renal insufficiency		HP
232	male	86	19958.5	9877.56	25000	99591.2	Death	26	10.92	0.135	91.1	523.4	17.7	18.5	13.1	74	6.14	30.1	2.6	25	10	Development Cohort	Non-postoperative group	Physical disease	Nonhypertension	Non-Diabetes	Non-Chronic cardiac insufficiency	Non-Chronic liver disease	Non-Chronic renal insufficiency		HP
233	male	50	16938.5	14245.4	25000	109674	survival	28	14.98	1.83	79.3	1186	17.5	19.6	17.9	83.2	8.25	36.8	2.6	24	10	Development Cohort	Non-postoperative group	Physical disease	Nonhypertension	Non-Diabetes	Non-Chronic cardiac insufficiency	Non-Chronic liver disease	Non-Chronic renal insufficiency		HP
234	male	36	18485.1	9685.05	12192.9	71926	survival	28	10.29	0.376	129	216.6	34.7	53.9	6.8	56.5	8.54	29.1	1.8	20	9	Development Cohort	Non-postoperative group	Physical disease	Nonhypertension	Non-Diabetes	Non-Chronic cardiac insufficiency	Non-Chronic liver disease	Non-Chronic renal insufficiency		HI
235	male	36	7056.66	12138.4	8773.26	61018.3	survival	28	10.46	0.169	84.4	214.2	8.7	13.8	9.7	152.1	7.43	27.8	1.8	20	9	Development Cohort	Non-postoperative group	Physical disease	Nonhypertension	Non-Diabetes	Non-Chronic cardiac insufficiency	Non-Chronic liver disease	Non-Chronic renal insufficiency		HI
236	female	40	10904.5	14718.6	18254.6	91569.5	survival	28	13.38	1.68	50.325	65.46	21.3	42.6	27.9	87.4	6.17	31.7	1.8	20	9	Development Cohort	Non-postoperative group	Physical disease	Nonhypertension	Non-Diabetes	Non-Chronic cardiac insufficiency	Non-Chronic liver disease	Non-Chronic renal insufficiency		HI
237	male	44	25000	25000	25000	150000	Death	9	19.44	3.65	202	322.4	41.2	84.8	20.8	118.8	24	26.4	2.6	29	10	Development Cohort	Non-postoperative group	Physical disease	Nonhypertension	Non-Diabetes	Non-Chronic cardiac insufficiency	Non-Chronic liver disease	Non-Chronic renal insufficiency		HP
238	male	59	7616.53	10794.9	6498.13	52997.5	Death	15	7.4	0.05	50.325	622	17	13	8.3	54	6.2	27.8	1.2	13	6	Development Cohort	Non-postoperative group	Malignant tumor	Nonhypertension	Non-Diabetes	Non-Chronic cardiac insufficiency	Non-Chronic liver disease	Non-Chronic renal insufficiency		HI
239	male	69	11213.8	5078.23	5422.97	37294.4	survival	19	10.1	16.9	50.325	2671	17	55	15.6	127	7.75	32.4	8.2	17	9	Development Cohort	Non-postoperative group	Postoperative	Nonhypertension	Non-Diabetes	Non-Chronic cardiac insufficiency	Non-Chronic liver disease	Non-Chronic renal insufficiency		HI
240	female	51	21545.9	16685.1	21545.9	114693	Death	12	14.6	35.76	119.49	5226	46	148	25	205	8.35	43	5.2	25	12	Development Cohort	Non-postoperative group	Postoperative	Nonhypertension	Non-Diabetes	Non-Chronic cardiac insufficiency	Non-Chronic liver disease	Non-Chronic renal insufficiency		HP
241	female	61	2510.44	6630.97	16448.9	55301.1	survival	5	15	1.28	165.63	3137	27	31	14.1	82	9.69	33.2	1.3	23	9	Development Cohort	Non-postoperative group	Physical disease	Nonhypertension	Non-Diabetes	Non-Chronic cardiac insufficiency	Non-Chronic liver disease	Non-Chronic renal insufficiency		HI
242	male	65	2470.53	4092.49	2875.36	20498.7	Death	26	11.4	0.05	35.7	2086	10	18	14.1	77	3.83	36.7	1.1	7	4	Development Cohort	Non-postoperative group	Physical disease	Nonhypertension	Non-Diabetes	Non-Chronic cardiac insufficiency	Non-Chronic liver disease	Non-Chronic renal insufficiency		LM
243	female	80	3445.15	2432.86	4959.41	20662.5	Death	18	11	0.05	60.32	1308	7	36	11.7	85	9.15	65.4	1.1	17	6	Development Cohort	Non-postoperative group	Physical disease	Hypertension	Diabetes	Non-Chronic cardiac insufficiency	Non-Chronic liver disease	Non-Chronic renal insufficiency		MM
244	male	68	15416.7	12300.4	14489.3	81296.5	Death	8	30.8	0.05	29.49	930	861	1428	20.3	106	21.3	39.7	15	20	9	Development Cohort	Non-postoperative group	Severe injury	Hypertension	Non-Diabetes	Non-Chronic cardiac insufficiency	Chronic liver disease	Non-Chronic renal insufficiency		HI
245	male	76	5039.26	5039.26	6054.41	32265.9	survival	12	11.8	7.95	299.35	647	7	32	18.7	106	10.98	39.2	2.3	17	6	Development Cohort	Non-postoperative group	Severe injury	Nonhypertension	Non-Diabetes	Non-Chronic cardiac insufficiency	Non-Chronic liver disease	Non-Chronic renal insufficiency		MM
246	male	59	5895.24	11057.6	3952.79	46973.5	survival	13	9.8	0.05	1.75	5275	26	59	31.6	85	12.56	34.6	1.2	9	12	Development Cohort	Non-postoperative group	Postoperative	Nonhypertension	Non-Diabetes	Non-Chronic cardiac insufficiency	Non-Chronic liver disease	Non-Chronic renal insufficiency		HI
247	male	60	4372.24	2145.23	7552.33	25912.6	survival	9	9.1	0.05	0.5	195	19	21	19.5	78	6.79	41.6	2	10	6	Development Cohort	Non-postoperative group	Postoperative	Nonhypertension	Non-Diabetes	Non-Chronic cardiac insufficiency	Non-Chronic liver disease	Non-Chronic renal insufficiency		MM
248	female	59	12666.1	5535.43	9535.92	48344.3	Death	9	8.4	0.05	2.02	37	14	66	9.3	85	12.56	26.5	1.1	13	6	Development Cohort	Non-postoperative group	Postoperative	Hypertension	Diabetes	Chronic cardiac insufficiency	Non-Chronic liver disease	Non-Chronic renal insufficiency		HI
249	female	37	3214.56	2464.7	11390.3	33389.2	survival	19	7.7	0.05	0.9	40	10	41	18.7	62	12.56	34.4	1.1	12	10	Development Cohort	Non-postoperative group	Postoperative	Nonhypertension	Non-Diabetes	Chronic cardiac insufficiency	Non-Chronic liver disease	Non-Chronic renal insufficiency		HI
250	female	83	3597.15	3637.55	6930.13	28370.1	survival	28	13.7	0.64	45.57	1236	27	111	10.7	50	8.4	38.7	1.8	22	1	Development Cohort	Non-postoperative group	Physical disease	Hypertension	Diabetes	Non-Chronic cardiac insufficiency	Non-Chronic liver disease	Non-Chronic renal insufficiency		MM
251	male	78	6393.63	8309.7	16448.9	64220.5	Death	28	14.6	0.1	18.01	9194	10	21	25.5	6	86	34.9	0.9	20	8	Development Cohort	Non-postoperative group	Malignant tumor	Hypertension	Diabetes	Non-Chronic cardiac insufficiency	Non-Chronic liver disease	Non-Chronic renal insufficiency		HI
252	female	65	3676.65	8445.58	5009.85	39033.1	survival	7	11.8	0.09	5.75	868	7	37	4.5	72	7.74	37.5	0.4	17	6	Development Cohort	Non-postoperative group	Physical disease	Hypertension	Non-Diabetes	Non-Chronic cardiac insufficiency	Non-Chronic liver disease	Non-Chronic renal insufficiency		MM
253	female	52	4941.62	6453.29	7862.22	40025.9	survival	10	6.5	0.46	15.67	25000	7	20	5.4	829	30.72	27.2	1.4	16	8	Development Cohort	Non-postoperative group	Physical disease	Nonhypertension	Non-Diabetes	Chronic cardiac insufficiency	Non-Chronic liver disease	Chronic renal insufficiency		MM
254	male	18	3938.08	9073.89	13806.1	58772	survival	5	21.1	0.05	0.5	50	35	80	8.5	72	12.56	27.9	5.8	27	10	Development Cohort	Non-postoperative group	Postoperative	Nonhypertension	Non-Diabetes	Chronic cardiac insufficiency	Non-Chronic liver disease	Non-Chronic renal insufficiency		HI
255	male	38	14715.8	6839.43	10595.1	56424.3	survival	12	9	0.37	158.45	223	55	245	51.3	126	12.56	29.7	2.2	13	11	Development Cohort	Non-postoperative group	Postoperative	Nonhypertension	Non-Diabetes	Non-Chronic cardiac insufficiency	Non-Chronic liver disease	Non-Chronic renal insufficiency		HI
256	male	45	11048	8138.62	13405.2	62274.3	Death	24	0.5	94.62	342.19	2756	37	32	43.6	247	19.5	30.5	4.5	19	8	Development Cohort	Non-postoperative group	Physical disease	Nonhypertension	Non-Diabetes	Non-Chronic cardiac insufficiency	Non-Chronic liver disease	Chronic renal insufficiency		HI
257	male	41	3410.64	12075.1	8893.38	57422.8	survival	7	21.2	7.48	20.83	704	646	968	7.9	278	9.02	39.9	0.6	29	8	Development Cohort	Non-postoperative group	Postoperative	Nonhypertension	Non-Diabetes	Non-Chronic cardiac insufficiency	Non-Chronic liver disease	Non-Chronic renal insufficiency		HI
258	male	53	2752.13	1398.49	1434.6	9816.8	survival	14	21.8	89.04	267.31	1413	8	40	15.3	201	9.5	32.7	1.3	24	13	Development Cohort	Non-postoperative group	Physical disease	Nonhypertension	Non-Diabetes	Non-Chronic cardiac insufficiency	Non-Chronic liver disease	Chronic renal insufficiency		LM
259	female	76	16448.9	10160.8	13998.3	74927.8	survival	5	20.9	2.74	50.325	20280	6930	14850	43.9	187	21.65	45.2	1.6	14	10	Development Cohort	Non-postoperative group	Physical disease	Hypertension	Non-Diabetes	Chronic cardiac insufficiency	Chronic liver disease	Chronic renal insufficiency		HI
260	male	37	876.72	3429.3	2596.31	16357.2	survival	12	14.6	0.91	89.55	637	27	78	25.6	80	5.54	29.1	0.9	20	8	Development Cohort	Non-postoperative group	Postoperative	Nonhypertension	Non-Diabetes	Non-Chronic cardiac insufficiency	Non-Chronic liver disease	Non-Chronic renal insufficiency		LM
261	male	18	1321.7	1207.1	1029.52	7002.04	survival	13	13.2	0.05	41.11	84	7	30	19.6	60	3.89	27.3	3	15	6	Development Cohort	Non-postoperative group	Physical disease	Nonhypertension	Non-Diabetes	Non-Chronic cardiac insufficiency	Non-Chronic liver disease	Non-Chronic renal insufficiency		LM
262	male	49	6879.44	9357.02	1931.08	38812.7	survival	9	9.3	0.05	17.91	134	12	17	6.8	32	4.56	30.2	0.7	11	4	Development Cohort	Non-postoperative group	Physical disease	Hypertension	Non-Diabetes	Non-Chronic cardiac insufficiency	Non-Chronic liver disease	Non-Chronic renal insufficiency		HI
263	male	37	2333.06	14100.7	1893.86	48423	survival	15	10.7	0.05	50.325	157	7	13	17.3	67	4.32	31.8	0.9	21	3	Development Cohort	Non-postoperative group	Severe injury	Hypertension	Non-Diabetes	Non-Chronic cardiac insufficiency	Non-Chronic liver disease	Non-Chronic renal insufficiency		HI
264	male	55	13447.6	5418.96	16448.9	62602.2	Death	28	9.7	5.13	166.21	772	7	54	9.2	91	3.77	44.5	1	19	11	Development Cohort	Non-postoperative group	Severe injury	Nonhypertension	Non-Diabetes	Non-Chronic cardiac insufficiency	Non-Chronic liver disease	Non-Chronic renal insufficiency		HI
265	male	49	16448.9	16448.9	16448.9	98693.3	Death	6	26.9	3.6	9.28	1974	97	650	11.4	189	6.48	44.3	7.6	29	13	Development Cohort	Non-postoperative group	Other	Nonhypertension	Non-Diabetes	Non-Chronic cardiac insufficiency	Non-Chronic liver disease	Non-Chronic renal insufficiency		HP
266	female	59	3434.05	2866.13	11564.3	35161.1	survival	21	7.4	0.05	20.88	15	9	21	25.8	53	4.7	29.1	0.9	20	11	Development Cohort	Non-postoperative group	Postoperative	Nonhypertension	Non-Diabetes	Non-Chronic cardiac insufficiency	Non-Chronic liver disease	Non-Chronic renal insufficiency		HI
267	male	71	8379.8	6244.45	4002.97	35119.1	Death	21	11.8	0.05	126.83	1207	7	13	6.1	58	6.54	31.7	2.7	17	6	Development Cohort	Non-postoperative group	Physical disease	Hypertension	Diabetes	Non-Chronic cardiac insufficiency	Non-Chronic liver disease	Non-Chronic renal insufficiency		MM
268	male	77	11556.5	6936.33	13035.6	58436.6	Death	19	12.7	1.44	154.18	1154	7	13	20.8	186	19.18	33.4	3.4	20	9	Development Cohort	Non-postoperative group	Physical disease	Nonhypertension	Diabetes	Non-Chronic cardiac insufficiency	Non-Chronic liver disease	Chronic renal insufficiency		HI
269	male	39	1068.18	1685.46	1807.23	9739.02	survival	8	15	1.13	182.63	134	39	28	14	50	3.56	38.5	1.3	15	5	Development Cohort	Non-postoperative group	Physical disease	Nonhypertension	Diabetes	Non-Chronic cardiac insufficiency	Non-Chronic liver disease	Non-Chronic renal insufficiency		LM
270	female	87	2458.1	5644.07	4938.44	29267.2	survival	8	7.9	0.05	0.5	11403	11	19	4.4	77	6.7	30	0.7	17	6	Development Cohort	Non-postoperative group	Physical disease	Nonhypertension	Non-Diabetes	Non-Chronic cardiac insufficiency	Non-Chronic liver disease	Non-Chronic renal insufficiency		MM
271	female	52	3280.93	2687.1	4837.18	21016.6	survival	6	34.2	0.28	60.32	85	7	13	26.3	96	6.98	38.3	3.6	12	9	Development Cohort	Non-postoperative group	Physical disease	Nonhypertension	Non-Diabetes	Non-Chronic cardiac insufficiency	Non-Chronic liver disease	Non-Chronic renal insufficiency		MM
272	female	64	1458.89	2528.94	1042.02	11129.8	Death	2	8.5	19.34	3.64	3903.07	7	25	8.3	6.3	2	32.1	1.2	13	11	Development Cohort	Non-postoperative group	Physical disease	Hypertension	Non-Diabetes	Non-Chronic cardiac insufficiency	Non-Chronic liver disease	Non-Chronic renal insufficiency		LM
273	male	58	1971.45	4169.32	2646.94	19773.3	survival	11	9.4	0.28	93.66	293	36	15	14.4	36	3.7	33.5	0.7	17	6	Development Cohort	Non-postoperative group	Postoperative	Nonhypertension	Non-Diabetes	Non-Chronic cardiac insufficiency	Non-Chronic liver disease	Non-Chronic renal insufficiency		MM
274	male	71	2019.07	1522.98	4375.78	15339.6	survival	12	8.6	0.86	60.32	552	7	17	8	57	5.31	180	6	17	6	Development Cohort	Non-postoperative group	Physical disease	Nonhypertension	Non-Diabetes	Non-Chronic cardiac insufficiency	Non-Chronic liver disease	Non-Chronic renal insufficiency		MM
275	female	69	3879.97	1586.69	7606.31	23852.7	survival	12	19.5	1.37	112.62	11658	21	173	7.7	113	13.16	37.4	1.9	15	9	Development Cohort	Non-postoperative group	Physical disease	Nonhypertension	Non-Diabetes	Non-Chronic cardiac insufficiency	Non-Chronic liver disease	Chronic renal insufficiency		HI
276	female	63	6267.56	4068.44	6091.42	30655.7	survival	17	17.6	1	261.59	1920	23	37	16.8	60	9.63	34.7	1.6	7	6	Development Cohort	Non-postoperative group	Postoperative	Nonhypertension	Non-Diabetes	Non-Chronic cardiac insufficiency	Non-Chronic liver disease	Non-Chronic renal insufficiency		MM
277	male	64	3950.58	2999.76	4812.79	22575.4	survival	11	7	0.85	26.32	25000	7	16	13.9	836	12.56	32.3	1.5	19	10	Development Cohort	Non-postoperative group	Physical disease	Hypertension	Diabetes	Chronic cardiac insufficiency	Non-Chronic liver disease	Chronic renal insufficiency		MM
278	male	37	8566.52	1257.84	1136.81	14613.7	survival	8	22.3	0.41	12.43	414	10	18	10.8	100	5.78	35.3	4.8	15	8	Development Cohort	Non-postoperative group	Severe injury	Hypertension	Non-Diabetes	Non-Chronic cardiac insufficiency	Non-Chronic liver disease	Non-Chronic renal insufficiency		HI
279	male	79	10452.8	3413.19	2351.12	25394.6	survival	14	16.9	1.86	31.25	9487	33	7	35.8	251	22.9	37.1	2.4	21	14	Development Cohort	Non-postoperative group	Physical disease	Nonhypertension	Non-Diabetes	Non-Chronic cardiac insufficiency	Chronic liver disease	Chronic renal insufficiency		HI
280	female	66	10027.2	7021.46	11765.1	54621.9	Death	9	9.5	0.05	2.24	738	16	24	11.5	84	12.56	36.3	1.1	16	9	Development Cohort	Non-postoperative group	Physical disease	Nonhypertension	Non-Diabetes	Chronic cardiac insufficiency	Non-Chronic liver disease	Non-Chronic renal insufficiency		HI
281	female	82	4689.16	4352.18	3289.46	24324.6	Death	19	12.6	0.05	91.49	15	7	22	7.9	160	10.19	38.7	3	26	12	Development Cohort	Non-postoperative group	Physical disease	Nonhypertension	Non-Diabetes	Non-Chronic cardiac insufficiency	Non-Chronic liver disease	Chronic renal insufficiency		MM
282	male	49	2173.31	2984.7	2555.06	16237.5	survival	12	10.3	19.34	222.22	3903.07	7	38	13.2	201	17.21	31.3	0.8	21	10	Development Cohort	Non-postoperative group	Postoperative	Nonhypertension	Non-Diabetes	Non-Chronic cardiac insufficiency	Non-Chronic liver disease	Non-Chronic renal insufficiency		LM
283	female	72	11818.6	4787.16	3999.54	34179.2	survival	11	25.2	1.6	50.325	671	38	58	17	128	8.04	70.8	14.4	38	10	Development Cohort	Non-postoperative group	Postoperative	Nonhypertension	Non-Diabetes	Non-Chronic cardiac insufficiency	Non-Chronic liver disease	Non-Chronic renal insufficiency		HI
284	male	65	11559.2	5155.59	5480.5	37987	Death	24	19.3	0.05	2.54	762	9	29	10.7	143	5.34	32.2	2.6	12	10	Development Cohort	Non-postoperative group	Malignant tumor	Hypertension	Non-Diabetes	Non-Chronic cardiac insufficiency	Non-Chronic liver disease	Non-Chronic renal insufficiency		HI
285	female	50	11518.2	10732.6	3465.48	50647.1	survival	11	7.7	200	50.325	18405	24	115	116.2	144	9.3	58.3	2.5	20	9	Development Cohort	Non-postoperative group	Physical disease	Nonhypertension	Non-Diabetes	Non-Chronic cardiac insufficiency	Chronic liver disease	Chronic renal insufficiency		HI
286	female	71	3150.36	5605.33	5157.77	30281.9	survival	9	9.2	0.12	60.32	10418	9	31	14.6	108	6.59	30.4	1.8	20	2	Development Cohort	Non-postoperative group	Malignant tumor	Hypertension	Diabetes	Chronic cardiac insufficiency	Non-Chronic liver disease	Non-Chronic renal insufficiency		MM
287	male	49	3770.94	2276.18	3806.04	18211.6	survival	8	8	10.22	119.31	180	7	13	10.7	86	12.56	161.5	1.2	20	12	Development Cohort	Non-postoperative group	Severe injury	Hypertension	Diabetes	Non-Chronic cardiac insufficiency	Non-Chronic liver disease	Non-Chronic renal insufficiency		MM
288	male	34	902.35	1427.35	586.6	6357.6	survival	9	15.6	1.43	281.9	379	25	59	152.7	104	9.76	33	1	15	5	Development Cohort	Non-postoperative group	Physical disease	Nonhypertension	Non-Diabetes	Non-Chronic cardiac insufficiency	Non-Chronic liver disease	Non-Chronic renal insufficiency		LM
289	female	53	16448.9	6800.73	3392.53	43636.1	survival	9	14.6	0.08	2.97	87	10	91	29.7	85	12.56	27	0.7	19	16	Development Cohort	Non-postoperative group	Postoperative	Nonhypertension	Diabetes	Chronic cardiac insufficiency	Non-Chronic liver disease	Non-Chronic renal insufficiency		HI
290	male	92	7628.02	8538.56	16448.9	66141.5	Death	12	5.4	7.22	175.66	4826	7	28	23.5	139	9.76	67.6	2	26	12	Development Cohort	Non-postoperative group	Physical disease	Nonhypertension	Non-Diabetes	Non-Chronic cardiac insufficiency	Non-Chronic liver disease	Chronic renal insufficiency		HI
291	male	56	3825.96	2632.49	2141.95	16007.3	survival	16	11.1	0.64	284.5	281	98	54	29.5	58	8.36	27.1	1.2	17	9	Development Cohort	Non-postoperative group	Postoperative	Hypertension	Non-Diabetes	Non-Chronic cardiac insufficiency	Non-Chronic liver disease	Non-Chronic renal insufficiency		LM
292	male	47	7234.51	4789.01	5339.02	32279.6	Death	16	33.1	5.32	174	653	7	19	20.9	76	11.52	50	2.2	24	11	Development Cohort	Non-postoperative group	Physical disease	Nonhypertension	Non-Diabetes	Non-Chronic cardiac insufficiency	Non-Chronic liver disease	Chronic renal insufficiency		MM
293	male	73	4982.74	6731.42	8908.56	42994.1	survival	22	16.1	7.66	172.1	8474	7	16	10.2	181	57.66	36.1	1.9	17	10	Development Cohort	Non-postoperative group	Physical disease	Hypertension	Diabetes	Non-Chronic cardiac insufficiency	Non-Chronic liver disease	Chronic renal insufficiency		MM
294	male	63	5068.59	5623.91	7823.83	37588	survival	7	17	0.05	0.5	84	25	36	23.3	86	12.56	36.3	1.4	13	10	Development Cohort	Non-postoperative group	Physical disease	Nonhypertension	Non-Diabetes	Non-Chronic cardiac insufficiency	Non-Chronic liver disease	Non-Chronic renal insufficiency		MM
295	male	48	10291.9	804.43	2320.66	17346.5	survival	8	11.1	88.24	50.325	1371	748	1769	28	235	30.38	42.3	7	26	19	Development Cohort	Non-postoperative group	Postoperative	Nonhypertension	Diabetes	Chronic cardiac insufficiency	Non-Chronic liver disease	Chronic renal insufficiency		HI
296	female	68	11969.6	15790.2	8469.98	76280.3	Death	3	11.3	34.63	258.06	1301	7	3	43.2	131	10.52	29.7	3.1	28	12	Development Cohort	Non-postoperative group	Physical disease	Nonhypertension	Non-Diabetes	Non-Chronic cardiac insufficiency	Non-Chronic liver disease	Non-Chronic renal insufficiency		HI
297	male	43	5092.96	3305.52	5277.51	25564.5	survival	25	14.2	2.11	60.95	52	7	42	67.1	79	12.56	32.6	1.7	5	12	Development Cohort	Non-postoperative group	Physical disease	Hypertension	Non-Diabetes	Non-Chronic cardiac insufficiency	Non-Chronic liver disease	Non-Chronic renal insufficiency		MM
298	male	68	16448.9	10727.9	7196.6	63025.8	Death	28	15.1	1.92	153.72	16707	7	18	5.6	148	13.28	36.5	2.2	31	10	Development Cohort	Non-postoperative group	Physical disease	Nonhypertension	Diabetes	Chronic cardiac insufficiency	Non-Chronic liver disease	Non-Chronic renal insufficiency		HI
299	male	61	13098.5	16448.9	16448.9	95343	Death	10	18.2	0.05	7.58	79	20	21	16.6	112	12.56	34.9	3	23	13	Development Cohort	Non-postoperative group	Physical disease	Nonhypertension	Non-Diabetes	Chronic cardiac insufficiency	Non-Chronic liver disease	Non-Chronic renal insufficiency		HI
300	male	93	5687.1	7743.39	3745.42	36408.1	survival	17	6.1	0.05	24.7	4705	29	26	9.5	100	19.36	33.2	1.5	22	12	Development Cohort	Non-postoperative group	Physical disease	Hypertension	Non-Diabetes	Non-Chronic cardiac insufficiency	Non-Chronic liver disease	Non-Chronic renal insufficiency		MM
301	female	84	8384.82	8796.36	16448.9	67671.7	survival	14	11.5	7.96	69.85	1308	94	61	12.4	134	14.54	66	2.7	28	15	Development Cohort	Non-postoperative group	Postoperative	Nonhypertension	Non-Diabetes	Chronic cardiac insufficiency	Non-Chronic liver disease	Chronic renal insufficiency		HI
302	male	86	8844.8	16448.9	14245.9	86683.3	Death	11	12.9	0.1	50.325	1653	26	27	16.5	123	24.56	38.6	1	31	10	Development Cohort	Non-postoperative group	Physical disease	Hypertension	Non-Diabetes	Chronic cardiac insufficiency	Non-Chronic liver disease	Non-Chronic renal insufficiency		HI
303	male	48	12399.5	15524.7	11066.4	81106.3	Death	10	15.6	0.13	51.92	270	12	24	11.8	195	20.34	37	2.9	31	10	Development Cohort	Non-postoperative group	Postoperative	Hypertension	Diabetes	Non-Chronic cardiac insufficiency	Non-Chronic liver disease	Chronic renal insufficiency		HI
304	female	83	5804.3	8407.48	8043.94	47114.6	survival	17	4.7	0.76	125.24	237	15	18	10.4	89	11.17	27	0.6	22	5	Development Cohort	Non-postoperative group	Postoperative	Hypertension	Non-Diabetes	Non-Chronic cardiac insufficiency	Non-Chronic liver disease	Non-Chronic renal insufficiency		HI
305	male	52	16448.9	16448.9	16448.9	98693.3	Death	23	10	0.22	267.2	352	45	32	18.4	91	7.68	41.8	0.9	27	13	Development Cohort	Non-postoperative group	Physical disease	Nonhypertension	Non-Diabetes	Non-Chronic cardiac insufficiency	Non-Chronic liver disease	Non-Chronic renal insufficiency		HP
306	male	33	2606.9	16448.9	16448.9	84851.4	Death	10	13.4	0.25	14.99	1846	7	19	17.3	350	12.95	31.6	2.5	27	9	Development Cohort	Non-postoperative group	Severe injury	Hypertension	Non-Diabetes	Non-Chronic cardiac insufficiency	Non-Chronic liver disease	Chronic renal insufficiency		HI
307	male	65	6188.1	2318.76	5573.36	24291.1	Death	12	6.8	12.94	254.76	2923	17	63	56.3	112	8.78	34.3	2.7	27	14	Development Cohort	Non-postoperative group	Physical disease	Nonhypertension	Non-Diabetes	Non-Chronic cardiac insufficiency	Non-Chronic liver disease	Non-Chronic renal insufficiency		MM
308	male	74	4146.81	3835.18	7253.21	30158.8	survival	9	8.5	0.05	11.74	2578	43	34	15.9	84	12.56	31.7	1.8	17	6	Development Cohort	Non-postoperative group	Physical disease	Hypertension	Diabetes	Chronic cardiac insufficiency	Non-Chronic liver disease	Non-Chronic renal insufficiency		MM
309	male	42	3923.8	2436.59	4903.95	21041.5	Death	8	13.7	1.07	143.55	4288	50	136	48.8	174	13.36	27.2	1.4	28	13	Development Cohort	Non-postoperative group	Postoperative	Nonhypertension	Non-Diabetes	Chronic cardiac insufficiency	Non-Chronic liver disease	Non-Chronic renal insufficiency		MM
310	male	18	3856.79	1396.15	1322.84	10690.9	survival	7	22.6	19.34	0.5	3903.07	33	54	16.2	145	12.56	28.9	0.9	17	6	Development Cohort	Non-postoperative group	Malignant tumor	Nonhypertension	Non-Diabetes	Non-Chronic cardiac insufficiency	Non-Chronic liver disease	Non-Chronic renal insufficiency		MM
311	female	56	2100.89	2201.31	2040.24	12785.3	survival	10	14.2	0.05	64.13	766	7	21	16.7	64	4.13	28.3	2.8	15	5	Development Cohort	Non-postoperative group	Postoperative	Nonhypertension	Non-Diabetes	Non-Chronic cardiac insufficiency	Non-Chronic liver disease	Non-Chronic renal insufficiency		LM
312	male	58	5659.46	10373.3	6361.97	49503.2	Death	9	10.8	2.59	201.62	7231	30	83	33.4	104	6.08	32.8	1.4	20	9	Development Cohort	Non-postoperative group	Physical disease	Nonhypertension	Non-Diabetes	Non-Chronic cardiac insufficiency	Non-Chronic liver disease	Non-Chronic renal insufficiency		HI
313	male	50	1269.77	16448.9	10119.2	70854.9	Death	9	13.4	19.34	5.85	3903.07	13	19	15.3	103	4.94	30	2.3	20	9	Development Cohort	Non-postoperative group	Postoperative	Nonhypertension	Non-Diabetes	Non-Chronic cardiac insufficiency	Non-Chronic liver disease	Non-Chronic renal insufficiency		HI
314	male	18	2010.68	7230.37	4573.32	32848.4	Death	21	14.9	0.62	63.68	492	213	56	12.5	82	4.14	41.4	3.2	17	6	Development Cohort	Non-postoperative group	Physical disease	Nonhypertension	Non-Diabetes	Non-Chronic cardiac insufficiency	Non-Chronic liver disease	Non-Chronic renal insufficiency		MM
315	male	40	14969.3	10095.7	4054.53	53365.4	survival	11	9.2	38.73	140.2	5771	7	22	20.1	205	8.53	38.5	0.9	20	8	Development Cohort	Non-postoperative group	Postoperative	Nonhypertension	Diabetes	Non-Chronic cardiac insufficiency	Non-Chronic liver disease	Non-Chronic renal insufficiency		HI
316	male	71	6921.35	16448.9	16448.9	89165.8	Death	10	9.5	0.24	50.325	62268	7	19	15.6	1177	15.93	33.2	2.1	40	8	Development Cohort	Non-postoperative group	Malignant tumor	Nonhypertension	Non-Diabetes	Chronic cardiac insufficiency	Non-Chronic liver disease	Chronic renal insufficiency		HI
317	male	38	3626.45	1978.39	2722.34	15006.3	survival	8	5.7	0.08	74.08	169	7	32	8.9	81	5.52	26.8	0.6	15	5	Development Cohort	Non-postoperative group	Postoperative	Nonhypertension	Non-Diabetes	Non-Chronic cardiac insufficiency	Non-Chronic liver disease	Non-Chronic renal insufficiency		LM
318	male	31	2251.55	2822.43	2508.83	15736.5	survival	17	12.6	3.28	74.08	15	18	58	56.5	117	12.4	35.6	0.9	15	5	Development Cohort	Non-postoperative group	Physical disease	Nonhypertension	Non-Diabetes	Non-Chronic cardiac insufficiency	Non-Chronic liver disease	Non-Chronic renal insufficiency		LM
319	male	60	2692.6	5107.21	7083.03	32180.3	survival	7	16.3	0.05	28.2	15	17	66	17.7	90	5.25	27.8	1.3	17	6	Development Cohort	Non-postoperative group	Severe injury	Hypertension	Non-Diabetes	Non-Chronic cardiac insufficiency	Non-Chronic liver disease	Non-Chronic renal insufficiency		MM
320	male	38	2332.48	2272.28	976.47	11102.3	survival	10	5.7	41.71	74.08	1241	175	234	86.8	73	3.64	48.7	13.8	15	5	Development Cohort	Non-postoperative group	Physical disease	Nonhypertension	Diabetes	Non-Chronic cardiac insufficiency	Chronic liver disease	Non-Chronic renal insufficiency		LM
321	male	35	1473.43	1860.47	1085.46	9225.76	survival	8	10.5	19.66	103.84	3282	27	73	27	109	12.56	34.9	3.7	15	5	Development Cohort	Non-postoperative group	Physical disease	Nonhypertension	Non-Diabetes	Non-Chronic cardiac insufficiency	Non-Chronic liver disease	Non-Chronic renal insufficiency		LM
322	male	70	953.42	6364.58	13348.7	46744.6	survival	10	10.5	0.42	110.26	354	35	65	17.7	89	12.56	36.5	1.7	29	13	Development Cohort	Non-postoperative group	Physical disease	Hypertension	Non-Diabetes	Non-Chronic cardiac insufficiency	Non-Chronic liver disease	Non-Chronic renal insufficiency		HI
323	male	39	6308.99	11518.4	2546.06	45956.2	survival	11	26.4	0.97	210.16	75	46	33	30.8	71	12.56	29.3	1.8	21	8	Development Cohort	Non-postoperative group	Physical disease	Nonhypertension	Non-Diabetes	Non-Chronic cardiac insufficiency	Non-Chronic liver disease	Non-Chronic renal insufficiency		HI
324	female	63	6578.4	9442.2	14315.6	63536.2	Death	7	13.1	7.47	7.77	1476	13	40	10.9	427	31.59	31	4	20	14	Development Cohort	Non-postoperative group	Physical disease	Nonhypertension	Non-Diabetes	Non-Chronic cardiac insufficiency	Non-Chronic liver disease	Chronic renal insufficiency		HI
325	male	61	2744.09	8551.55	6528.95	41456.6	Death	18	16.3	0.1	20.16	336	40	39	14.1	107	12.56	36.7	2.8	31	15	Development Cohort	Non-postoperative group	Severe injury	Nonhypertension	Non-Diabetes	Non-Chronic cardiac insufficiency	Non-Chronic liver disease	Non-Chronic renal insufficiency		HI
326	female	41	7711.15	8674.33	5737.36	45208.9	survival	1	25.7	2.97	50.325	3751	7	23	8.5	245	15.3	31.6	0.6	21	11	Development Cohort	Non-postoperative group	Physical disease	Nonhypertension	Diabetes	Non-Chronic cardiac insufficiency	Non-Chronic liver disease	Non-Chronic renal insufficiency		HI
327	female	80	3071.92	4629.44	2879.09	22718.4	survival	7	17.2	4.68	262.44	14415	35	51	12.9	61	12.56	29.3	2.9	22	5	Development Cohort	Non-postoperative group	Physical disease	Nonhypertension	Non-Diabetes	Non-Chronic cardiac insufficiency	Non-Chronic liver disease	Non-Chronic renal insufficiency		MM
328	male	48	7378.4	3384.2	5894.71	29320.4	survival	14	5.8	35.57	65.06	5643	35	60	80.6	107	18.73	50	2.1	40	1	Development Cohort	Non-postoperative group	Physical disease	Nonhypertension	Non-Diabetes	Non-Chronic cardiac insufficiency	Chronic liver disease	Non-Chronic renal insufficiency		MM
329	female	66	991.31	9170.23	6066.71	40635.4	Death	14	9.6	0.79	311	15361	9	37	3.4	243	30.3	29.5	3.4	20	9	Development Cohort	Non-postoperative group	Physical disease	Hypertension	Diabetes	Non-Chronic cardiac insufficiency	Non-Chronic liver disease	Chronic renal insufficiency		HI
330	male	65	3060.12	8230.98	5518.04	38789.1	Death	9	12.6	0.6	186.37	5120	7	13	13	49	5.28	48.9	1.4	28	12	Development Cohort	Non-postoperative group	Malignant tumor	Nonhypertension	Non-Diabetes	Non-Chronic cardiac insufficiency	Non-Chronic liver disease	Non-Chronic renal insufficiency		MM
331	male	39	16448.9	16141.7	7063.89	79001.8	Death	10	16.3	0.9	77.05	90	358	326	33	120	11.66	57.8	10.1	24	11	Development Cohort	Non-postoperative group	Severe injury	Nonhypertension	Non-Diabetes	Non-Chronic cardiac insufficiency	Chronic liver disease	Non-Chronic renal insufficiency		HP
332	male	54	3682.69	3404.9	4237.62	22372.6	survival	9	12.9	8.56	117.05	1062	7	13	34.2	124	5.88	40.6	1	23	10	Development Cohort	Non-postoperative group	Severe injury	Hypertension	Diabetes	Non-Chronic cardiac insufficiency	Non-Chronic liver disease	Non-Chronic renal insufficiency		MM
333	male	63	1876.7	1955.65	1355.8	10455.2	survival	7	7.1	0.05	74.08	914	31	42	14.6	69	7.54	40	1.2	15	9	Development Cohort	Non-postoperative group	Postoperative	Hypertension	Non-Diabetes	Non-Chronic cardiac insufficiency	Non-Chronic liver disease	Non-Chronic renal insufficiency		LM
334	female	50	1679.41	1336.41	2611.37	10911.4	survival	28	11.2	0.05	5.18	23	12	17	6.6	58	4.7	32.7	2.7	19	6	Development Cohort	Non-postoperative group	Severe injury	Nonhypertension	Non-Diabetes	Non-Chronic cardiac insufficiency	Non-Chronic liver disease	Non-Chronic renal insufficiency		LM
335	male	26	16448.9	7433.38	2639.66	44028.3	survival	10	11.7	0.57	42.71	51	7	13	13.3	158	12.99	28.9	0.5	16	10	Development Cohort	Non-postoperative group	Physical disease	Nonhypertension	Diabetes	Non-Chronic cardiac insufficiency	Non-Chronic liver disease	Chronic renal insufficiency		HI
336	male	63	2710.11	5488.79	6646.63	32469.7	survival	18	9.9	0.05	0.5	1059	7	18	13.5	78	7.15	30.2	1.5	8	3	Development Cohort	Non-postoperative group	Physical disease	Nonhypertension	Non-Diabetes	Non-Chronic cardiac insufficiency	Non-Chronic liver disease	Non-Chronic renal insufficiency		MM
337	male	37	8715.86	9217.27	8031.87	52431.4	Death	13	9.7	0.35	35.43	227	78	314	192	57	1.52	37	5.1	20	9	Development Cohort	Non-postoperative group	Physical disease	Nonhypertension	Non-Diabetes	Non-Chronic cardiac insufficiency	Chronic liver disease	Non-Chronic renal insufficiency		HI
338	female	24	10425.8	10691.5	3028.48	48557.3	survival	12	17.3	23.98	32.43	15537	116	113	10.2	251	12.56	29.5	1	16	10	Development Cohort	Non-postoperative group	Postoperative	Nonhypertension	Non-Diabetes	Chronic cardiac insufficiency	Chronic liver disease	Chronic renal insufficiency		HI
339	female	69	9566.63	6982.19	3187.29	36887.8	Death	10	14.3	0.05	2.38	3152	12	56	24.8	95	12.56	33.7	2.9	20	9	Development Cohort	Non-postoperative group	Postoperative	Nonhypertension	Non-Diabetes	Non-Chronic cardiac insufficiency	Non-Chronic liver disease	Non-Chronic renal insufficiency		HI
340	male	28	10755.9	2463.1	4600.55	27346.3	Death	9	8.3	6.64	358.8	2546	7	13	18.7	92	5.61	29.2	2.1	31	14	Development Cohort	Non-postoperative group	Physical disease	Nonhypertension	Diabetes	Non-Chronic cardiac insufficiency	Non-Chronic liver disease	Non-Chronic renal insufficiency		HI
341	female	71	16448.9	9610.49	9742.67	64765.7	Death	2	1.3	32.37	50.325	2993	7	36	15.8	165	19.45	180	2.6	31	9	Development Cohort	Non-postoperative group	Postoperative	Nonhypertension	Non-Diabetes	Non-Chronic cardiac insufficiency	Non-Chronic liver disease	Non-Chronic renal insufficiency		HI
342	male	37	11913.3	5783.68	3201.42	35667.1	survival	3	7.8	0.05	50.325	15	64.92	117.69	29.62	154.1	12.56	135.5	1.1	15	15	Development Cohort	Non-postoperative group	Physical disease	Nonhypertension	Diabetes	Non-Chronic cardiac insufficiency	Non-Chronic liver disease	Non-Chronic renal insufficiency		HI
343	female	72	2182.53	2470.58	2037.42	13669.1	survival	8	9.2	0.05	74.08	624	7	19	9.8	45	3.76	29	0.5	22	4	Development Cohort	Non-postoperative group	Severe injury	Nonhypertension	Non-Diabetes	Non-Chronic cardiac insufficiency	Non-Chronic liver disease	Non-Chronic renal insufficiency		LM
344	male	30	2457.83	2832.42	2476.26	15907.6	survival	21	28.1	1.63	298	112	39	53	119.1	79	9.67	27.4	0.9	13	5	Development Cohort	Non-postoperative group	Physical disease	Nonhypertension	Non-Diabetes	Non-Chronic cardiac insufficiency	Non-Chronic liver disease	Non-Chronic renal insufficiency		LM
345	male	46	5866.85	8843.59	5715.84	43829.3	survival	9	9.6	0.05	0.51	167	7	18	12.3	110	3.99	32.8	4.6	16	9	Development Cohort	Non-postoperative group	Physical disease	Hypertension	Diabetes	Non-Chronic cardiac insufficiency	Non-Chronic liver disease	Chronic renal insufficiency		HI
346	male	52	1769.99	4151.63	4341.47	22907.8	survival	8	7	7.11	122.54	15999	19	60	50.4	613	36.41	29.4	0.4	17	6	Development Cohort	Non-postoperative group	Postoperative	Hypertension	Non-Diabetes	Chronic cardiac insufficiency	Non-Chronic liver disease	Chronic renal insufficiency		MM
347	male	56	5997.29	5557.73	2413.1	27496.7	Death	15	15	0.31	48.37	197	33	29	42.1	78	19.49	25.9	2	19	6	Development Cohort	Non-postoperative group	Physical disease	Nonhypertension	Non-Diabetes	Chronic cardiac insufficiency	Non-Chronic liver disease	Chronic renal insufficiency		MM
348	female	74	3656.36	4034.32	4237.41	24234.1	survival	11	10	0.05	18.01	136	7	14	16.9	87	13.87	26	1.4	17	6	Development Cohort	Non-postoperative group	Physical disease	Nonhypertension	Non-Diabetes	Non-Chronic cardiac insufficiency	Non-Chronic liver disease	Non-Chronic renal insufficiency		MM
349	male	61	12058.8	11824.5	16319.9	80172	Death	9	14.4	140.5	321.82	1859	623	608	136	388	31.46	38.8	0.6	20	10	Development Cohort	Non-postoperative group	Physical disease	Nonhypertension	Diabetes	Chronic cardiac insufficiency	Chronic liver disease	Chronic renal insufficiency		HI
350	female	57	2097.82	1832.46	2957.2	13509.6	survival	9	19.9	2.9	5.17	1963	27	24	53.1	171	16.19	25.9	1.6	30	8	Development Cohort	Non-postoperative group	Malignant tumor	Nonhypertension	Non-Diabetes	Non-Chronic cardiac insufficiency	Non-Chronic liver disease	Non-Chronic renal insufficiency		LM
351	female	71	2493.85	3463.82	3980.82	20847	survival	15	5	12.07	60.32	1446	7	20	9	69	5.69	28.8	1.2	29	6	Development Cohort	Non-postoperative group	Physical disease	Nonhypertension	Non-Diabetes	Non-Chronic cardiac insufficiency	Non-Chronic liver disease	Non-Chronic renal insufficiency		MM
352	male	48	8272.83	6784.85	4093.5	36814.4	survival	10	8.1	5.25	39.89	124	11	46	80	129	22.97	91.4	9.04	17	12	Development Cohort	Non-postoperative group	Severe injury	Nonhypertension	Non-Diabetes	Non-Chronic cardiac insufficiency	Chronic liver disease	Non-Chronic renal insufficiency		MM
353	male	54	9036.08	3496.79	4354.49	28235.4	Death	13	8.7	1.37	74.71	372	36	176	14.5	371	12.56	32.4	1.2	20	14	Development Cohort	Non-postoperative group	Physical disease	Hypertension	Non-Diabetes	Non-Chronic cardiac insufficiency	Non-Chronic liver disease	Chronic renal insufficiency		HI
354	male	67	16448.9	2858.08	2612.39	30247.9	survival	14	25	186.61	50.325	25000	78	266	71.4	328	13.2	86.2	4.6	20	9	Development Cohort	Non-postoperative group	Severe injury	Hypertension	Non-Diabetes	Non-Chronic cardiac insufficiency	Non-Chronic liver disease	Chronic renal insufficiency		HI
355	male	61	3591.27	3335.34	2020.19	17637.7	survival	15	6.7	0.68	63.9	330	32	31	7.3	62	10.73	28.7	0.7	17	1	Development Cohort	Non-postoperative group	Postoperative	Nonhypertension	Non-Diabetes	Chronic cardiac insufficiency	Non-Chronic liver disease	Non-Chronic renal insufficiency		LM
356	female	66	8601.68	4114.28	6854.66	34653.8	Death	12	8	0.05	16.22	2757	4	35	66.9	107	15.16	38.7	8.5	20	14	Development Cohort	Non-postoperative group	Severe injury	Nonhypertension	Non-Diabetes	Chronic cardiac insufficiency	Chronic liver disease	Chronic renal insufficiency		HI
357	male	60	2581.72	3026.33	10289.8	32240.3	survival	8	7.7	0.05	14.75	184	16	13	8.2	62	3.86	40.2	0.8	26	9	Development Cohort	Non-postoperative group	Postoperative	Hypertension	Diabetes	Non-Chronic cardiac insufficiency	Non-Chronic liver disease	Chronic renal insufficiency		HI
358	male	29	2233.51	3263.44	2513.2	17050.2	survival	28	17.8	1.36	175	89	89	609	39.7	97	8.01	45.1	1.8	19	11	Development Cohort	Non-postoperative group	Physical disease	Nonhypertension	Non-Diabetes	Non-Chronic cardiac insufficiency	Non-Chronic liver disease	Non-Chronic renal insufficiency		LM
359	female	71	4547.54	2521.33	835.65	13782.8	survival	10	6.4	0.83	11.88	447	23	34	17.3	84	7.16	27.1	2.2	17	6	Development Cohort	Non-postoperative group	Physical disease	Hypertension	Non-Diabetes	Chronic cardiac insufficiency	Non-Chronic liver disease	Chronic renal insufficiency		MM
360	male	73	7881.31	7076.31	3302.73	35715.7	survival	8	5.3	1.04	86.76	3526	7	50	17.9	89	12.56	96.7	1	15	8	Development Cohort	Non-postoperative group	Physical disease	Nonhypertension	Non-Diabetes	Non-Chronic cardiac insufficiency	Non-Chronic liver disease	Non-Chronic renal insufficiency		MM
361	female	65	6519.87	11239.7	1379.04	42997	survival	6	5.5	0.65	50.325	9883	676	1514	15.7	76	17.11	39.3	1.3	20	9	Development Cohort	Non-postoperative group	Physical disease	Nonhypertension	Non-Diabetes	Chronic cardiac insufficiency	Non-Chronic liver disease	Non-Chronic renal insufficiency		HI
362	female	77	5158.06	12798.7	4976.52	53507.2	survival	11	13.7	0.57	20.18	23198	13	35	12.9	371	21.98	31.6	1.2	20	9	Development Cohort	Non-postoperative group	Physical disease	Nonhypertension	Non-Diabetes	Non-Chronic cardiac insufficiency	Chronic liver disease	Chronic renal insufficiency		HI
363	male	67	9603.31	3688.87	1406.18	23482.3	survival	11	5.3	24.38	50.325	13453	7	26	81.3	401	38.89	47.1	1.3	20	9	Development Cohort	Non-postoperative group	Physical disease	Nonhypertension	Non-Diabetes	Non-Chronic cardiac insufficiency	Chronic liver disease	Chronic renal insufficiency		HI
364	male	50	9090.81	20000	2286.21	73663.2	survival	15	12.6	0.05	1.38	190	157	73	15	91	12.56	26.1	2.6	11	9	Development Cohort	Non-postoperative group	Physical disease	Hypertension	Non-Diabetes	Chronic cardiac insufficiency	Non-Chronic liver disease	Non-Chronic renal insufficiency		HP
365	male	59	10906.4	4152.39	2634.57	28632.7	survival	10	13.1	0.05	65.99	323	36	46	38.9	74	12.56	35.5	2.3	5	6	Development Cohort	Non-postoperative group	Physical disease	Hypertension	Non-Diabetes	Non-Chronic cardiac insufficiency	Non-Chronic liver disease	Non-Chronic renal insufficiency		HI
366	male	83	12438.5	2409.33	3552.24	26770.9	Death	14	5.2	0.05	4.49	1366	9	17	18	76	9.41	32.6	3	20	9	Development Cohort	Non-postoperative group	Postoperative	Nonhypertension	Non-Diabetes	Non-Chronic cardiac insufficiency	Non-Chronic liver disease	Non-Chronic renal insufficiency		HI
367	male	55	15981.7	1589.4	2332.86	25415.6	survival	7	9.6	1.45	34.15	228	9	26	18.2	87	5.72	38.5	0.8	20	9	Development Cohort	Non-postoperative group	Postoperative	Nonhypertension	Non-Diabetes	Non-Chronic cardiac insufficiency	Non-Chronic liver disease	Non-Chronic renal insufficiency		HI
368	female	69	3364.17	6714.75	5818.11	35144.6	survival	12	7.3	28.7	60.32	3959	885	2268	30.4	151	5.5	34.5	1.8	23	10	Development Cohort	Non-postoperative group	Physical disease	Nonhypertension	Non-Diabetes	Non-Chronic cardiac insufficiency	Chronic liver disease	Chronic renal insufficiency		MM
369	male	76	10373.5	9037.41	8658.03	54801.8	Death	12	11.5	0.57	31.37	8907	32	38	11.7	537	37	34.1	1	20	9	Development Cohort	Non-postoperative group	Physical disease	Nonhypertension	Non-Diabetes	Non-Chronic cardiac insufficiency	Non-Chronic liver disease	Chronic renal insufficiency		HI
370	male	78	2261.04	4363.05	5122.56	25595.3	survival	7	14.4	0.05	38.14	1984	15	30	11.6	119	6.95	29	1.5	9	9	Development Cohort	Non-postoperative group	Physical disease	Nonhypertension	Non-Diabetes	Non-Chronic cardiac insufficiency	Non-Chronic liver disease	Non-Chronic renal insufficiency		MM
371	male	40	2541.9	2419.59	2476.8	14754.3	survival	19	14.6	2.49	35.71	74	41	60	22.4	86	6.06	29.7	0.6	15	5	Development Cohort	Non-postoperative group	Postoperative	Nonhypertension	Non-Diabetes	Non-Chronic cardiac insufficiency	Non-Chronic liver disease	Non-Chronic renal insufficiency		LM
372	male	71	2507.64	5486.55	5646.09	30259.5	survival	14	6.8	0.05	3.03	236	20	33	15.6	85	12.56	44.6	3.2	10	12	Development Cohort	Non-postoperative group	Physical disease	Hypertension	Diabetes	Non-Chronic cardiac insufficiency	Non-Chronic liver disease	Non-Chronic renal insufficiency		MM
373	male	65	3953.07	2422.02	2296.17	15811.5	survival	9	7.9	6.24	10.32	249	19	79	33.1	955	8.15	32.1	2.1	27	14	Development Cohort	Non-postoperative group	Postoperative	Nonhypertension	Non-Diabetes	Non-Chronic cardiac insufficiency	Non-Chronic liver disease	Non-Chronic renal insufficiency		MM
374	male	57	2483.61	2754.3	2556.27	15859	survival	8	15.8	0.08	0.5	40	9	41	5.8	114	12.56	30.2	2.6	8	9	Development Cohort	Non-postoperative group	Severe injury	Nonhypertension	Non-Diabetes	Non-Chronic cardiac insufficiency	Non-Chronic liver disease	Non-Chronic renal insufficiency		LM
375	female	57	20000	3475.17	4514.4	39454.3	survival	7	8.4	13.54	77.05	451	7	13	9.6	374	44.27	20.3	4.2	22	10	Development Cohort	Non-postoperative group	Malignant tumor	Hypertension	Diabetes	Non-Chronic cardiac insufficiency	Non-Chronic liver disease	Non-Chronic renal insufficiency		HP
376	male	62	2654.19	2598.84	2699.79	15850.3	survival	11	14.2	0.39	74.08	4717	68	77	13.5	83	12.14	30.5	0.9	20	11	Development Cohort	Non-postoperative group	Postoperative	Nonhypertension	Non-Diabetes	Non-Chronic cardiac insufficiency	Non-Chronic liver disease	Non-Chronic renal insufficiency		LM
377	male	74	5898.72	11368.2	13179.7	66362.8	survival	19	9	0.06	43.99	1455	7	16	53.3	160	9.31	73.4	0.7	14	13	Development Cohort	Non-postoperative group	Physical disease	Hypertension	Non-Diabetes	Chronic cardiac insufficiency	Chronic liver disease	Non-Chronic renal insufficiency		HI
378	male	77	3468.93	5837.28	6872.37	34725.5	Death	3	13.8	0.05	10.32	2116	34	34	9.4	70	8.3	31.7	1.9	17	6	Development Cohort	Non-postoperative group	Physical disease	Nonhypertension	Non-Diabetes	Chronic cardiac insufficiency	Non-Chronic liver disease	Chronic renal insufficiency		MM
379	female	71	5132.52	2657.16	3310.05	19724.1	survival	14	6.8	2.4	60.32	7557	7	13	7.7	72	6.71	40.7	1.1	17	6	Development Cohort	Non-postoperative group	Physical disease	Hypertension	Diabetes	Chronic cardiac insufficiency	Non-Chronic liver disease	Non-Chronic renal insufficiency		MM
380	female	68	8341.05	5551.74	5572.41	36141.1	survival	11	17	0.59	218.08	21	8	33	36.4	101	8.49	36.4	0.7	19	6	Development Cohort	Non-postoperative group	Malignant tumor	Hypertension	Non-Diabetes	Non-Chronic cardiac insufficiency	Non-Chronic liver disease	Non-Chronic renal insufficiency		MM
381	male	36	2443.26	3587.88	3806.55	20820	survival	7	23.5	0.05	74.08	45	37	72	44.5	66	4.3	29.7	3.4	22	13	Development Cohort	Non-postoperative group	Physical disease	Nonhypertension	Non-Diabetes	Non-Chronic cardiac insufficiency	Non-Chronic liver disease	Non-Chronic renal insufficiency		LM
382	male	49	2646.12	3577.89	2288.34	17956.5	survival	28	13.1	0.05	52.95	194	9	20	14.7	113	7.9	26.3	0.8	7	8	Development Cohort	Non-postoperative group	Physical disease	Nonhypertension	Non-Diabetes	Non-Chronic cardiac insufficiency	Non-Chronic liver disease	Non-Chronic renal insufficiency		LM
383	male	36	2745.78	5115.9	3164.52	24422.5	survival	4	10.7	18.52	39.59	1268	36	101	80.2	167	9.53	30.6	6.1	6	6	Development Cohort	Non-postoperative group	Physical disease	Nonhypertension	Non-Diabetes	Non-Chronic cardiac insufficiency	Chronic liver disease	Chronic renal insufficiency		MM
384	male	65	3065.34	2367.78	3348.42	16865.5	survival	4	5.7	0.37	74.08	6563	7	16	11.6	922	20.55	58.5	0.7	15	5	Development Cohort	Non-postoperative group	Postoperative	Hypertension	Non-Diabetes	Non-Chronic cardiac insufficiency	Non-Chronic liver disease	Chronic renal insufficiency		LM
385	female	26	5581.92	4488.09	5325.45	29697.1	survival	12	18	3.61	106.61	3007	21	23	11.6	89	12.13	29.7	1.8	11	2	Development Cohort	Non-postoperative group	Physical disease	Nonhypertension	Non-Diabetes	Chronic cardiac insufficiency	Non-Chronic liver disease	Chronic renal insufficiency		MM
386	male	56	2067.42	4188.36	3010.95	20654.4	survival	8	6.1	0.48	90.73	142	31	44	22.2	64	3.1	29.9	1.4	17	6	Development Cohort	Non-postoperative group	Physical disease	Nonhypertension	Non-Diabetes	Non-Chronic cardiac insufficiency	Non-Chronic liver disease	Non-Chronic renal insufficiency		MM
387	female	75	6544.35	14577	6430.83	63136.9	survival	14	24	1.92	86.07	12972	22	40	14	153	9.13	31.4	1.3	28	12	Development Cohort	Non-postoperative group	Physical disease	Nonhypertension	Diabetes	Chronic cardiac insufficiency	Non-Chronic liver disease	Chronic renal insufficiency		HI
388	male	37	5974.68	3954	17557.4	52951.4	Death	13	12.9	153.16	332.54	25000	510	684	34.9	507	13.08	51.1	9.3	33	19	Development Cohort	Non-postoperative group	Physical disease	Nonhypertension	Non-Diabetes	Chronic cardiac insufficiency	Non-Chronic liver disease	Chronic renal insufficiency		HI
389	male	62	5968.74	3251.49	16129.7	47982.6	survival	14	24.1	0.37	93.5	1388	53	58	9.6	123	8.71	29.7	2.1	15	9	Development Cohort	Non-postoperative group	Physical disease	Nonhypertension	Non-Diabetes	Non-Chronic cardiac insufficiency	Non-Chronic liver disease	Non-Chronic renal insufficiency		HI
390	male	63	2083.8	3316.8	6933.87	25901.9	survival	15	7.6	0.64	26.64	509	24	48	12	77	5.28	47.1	2.2	9	5	Development Cohort	Non-postoperative group	Physical disease	Hypertension	Diabetes	Non-Chronic cardiac insufficiency	Non-Chronic liver disease	Non-Chronic renal insufficiency		MM
391	female	41	2566.17	4450.29	4487.67	24892.4	survival	10	27.2	0.18	26.54	281	296	256	10.7	69	5.67	34.6	2.3	21	4	Development Cohort	Non-postoperative group	Other	Nonhypertension	Non-Diabetes	Non-Chronic cardiac insufficiency	Non-Chronic liver disease	Non-Chronic renal insufficiency		MM
392	male	37	2532.54	3507.63	9027.09	31109.6	survival	8	11.4	2.8	50.325	114	51	61	8.6	84	8.92	26.7	1.3	4	9	Development Cohort	Non-postoperative group	Postoperative	Nonhypertension	Non-Diabetes	Non-Chronic cardiac insufficiency	Non-Chronic liver disease	Non-Chronic renal insufficiency		HI
393	female	62	5121.75	5953.32	9698.7	42379.1	survival	18	6.4	0.15	168.63	9789	7	21	13.4	192	7.44	85.6	0.6	19	10	Development Cohort	Non-postoperative group	Physical disease	Nonhypertension	Non-Diabetes	Chronic cardiac insufficiency	Non-Chronic liver disease	Chronic renal insufficiency		HI
394	male	29	11299.4	20797.6	26017.8	125728	Death	28	9.5	1.34	77.05	2170	7	20	16.9	404	30.39	33.6	1.6	19	11	Development Cohort	Non-postoperative group	Physical disease	Nonhypertension	Non-Diabetes	Non-Chronic cardiac insufficiency	Non-Chronic liver disease	Non-Chronic renal insufficiency		HP
395	male	70	9046.53	8112.3	9526.92	52437.3	Death	8	6.4	0.58	13.71	7209	27	94	81.5	88	12.56	48.6	3.7	12	9	Development Cohort	Non-postoperative group	Physical disease	Nonhypertension	Non-Diabetes	Non-Chronic cardiac insufficiency	Chronic liver disease	Chronic renal insufficiency		HI
396	female	48	6667.74	10825.4	14861.6	68867.2	Death	10	13.7	46.55	44.41	25000	36	107	17.5	292	20.86	55.2	1.4	17	14	Development Cohort	Non-postoperative group	Postoperative	Nonhypertension	Non-Diabetes	Chronic cardiac insufficiency	Non-Chronic liver disease	Non-Chronic renal insufficiency		HI
397	female	85	3400.53	3003.15	6373.77	25157.5	survival	10	13.5	0.28	60.32	3653	10	39	4.3	103	15.2	29.1	0.8	30	8	Development Cohort	Non-postoperative group	Physical disease	Hypertension	Non-Diabetes	Chronic cardiac insufficiency	Non-Chronic liver disease	Non-Chronic renal insufficiency		MM
398	male	59	2264.1	4905.3	8089.08	33158.2	survival	10	17.6	0.05	1.78	241	13	20	30.8	59	11.26	34.9	1.2	10	6	Development Cohort	Non-postoperative group	Physical disease	Nonhypertension	Diabetes	Non-Chronic cardiac insufficiency	Non-Chronic liver disease	Non-Chronic renal insufficiency		MM
399	female	63	2350.95	3986.1	3909.15	22127.5	survival	13	10.8	0.05	1.77	3472	24	26	11.5	84	12.56	35.9	1.3	10	8	Development Cohort	Non-postoperative group	Physical disease	Hypertension	Non-Diabetes	Chronic cardiac insufficiency	Non-Chronic liver disease	Non-Chronic renal insufficiency		MM
400	female	50	5842.44	5589.66	5754.15	34119.7	survival	9	6.2	1.71	83.85	2.828	7	16	18.6	169	847.2	29.2	0.8	9	3	Development Cohort	Non-postoperative group	Physical disease	Nonhypertension	Diabetes	Non-Chronic cardiac insufficiency	Non-Chronic liver disease	Non-Chronic renal insufficiency		MM
401	female	79	3064.47	10748.5	14277.4	63864.6	survival	28	8.4	0.05	14.33	2332	7	21	6	140	9.85	34.7	0.3	20	9	Development Cohort	Non-postoperative group	Physical disease	Nonhypertension	Non-Diabetes	Non-Chronic cardiac insufficiency	Non-Chronic liver disease	Non-Chronic renal insufficiency		HI
402	male	67	20000	24895.7	31756.5	158200	Death	7	25.3	66.59	321.63	25000	17	97	81	135	9.74	56.4	3.1	28	10	Development Cohort	Non-postoperative group	Physical disease	Hypertension	Non-Diabetes	Non-Chronic cardiac insufficiency	Non-Chronic liver disease	Non-Chronic renal insufficiency		HP
403	female	62	4732.11	6405.36	7696.41	39341	survival	11	5.8	0.78	72.18	733	14	20	13.6	35	3.13	22.8	1	12	2	Development Cohort	Non-postoperative group	Physical disease	Nonhypertension	Non-Diabetes	Non-Chronic cardiac insufficiency	Non-Chronic liver disease	Non-Chronic renal insufficiency		MM
404	male	55	4267.2	10346.4	8051.13	51408.7	survival	8	12.3	1.62	20.39	66	44	48	33.6	115	5.3	35.6	2.7	20	9	Development Cohort	Non-postoperative group	Postoperative	Nonhypertension	Non-Diabetes	Non-Chronic cardiac insufficiency	Non-Chronic liver disease	Non-Chronic renal insufficiency		HI
405	male	48	14299.8	4537.05	7786.86	43484.6	survival	11	11.5	2.83	58.11	15	10	36	16.6	110	12.56	36	2.5	11	8	Development Cohort	Non-postoperative group	Severe injury	Hypertension	Non-Diabetes	Non-Chronic cardiac insufficiency	Chronic liver disease	Chronic renal insufficiency		HI
406	male	69	21264.8	8492.34	14877.3	76496.5	Death	18	43	0.16	131.82	1677	13	70	38	123	8.21	26.5	6.2	21	8	Development Cohort	Non-postoperative group	Physical disease	Nonhypertension	Non-Diabetes	Chronic cardiac insufficiency	Non-Chronic liver disease	Non-Chronic renal insufficiency		HP
407	male	59	6568.41	8152.2	10947.4	52919.8	Death	10	13.8	0.27	164.23	810	7	14	27.7	346	12.36	41	0.7	20	9	Development Cohort	Non-postoperative group	Physical disease	Hypertension	Non-Diabetes	Chronic cardiac insufficiency	Non-Chronic liver disease	Chronic renal insufficiency		HI
408	male	51	20642.8	11767.5	15446.5	86838.2	survival	8	21.8	0.21	13.56	230	222	384	90.2	256	23.03	43.3	4.8	21	6	Development Cohort	Non-postoperative group	Severe injury	Hypertension	Non-Diabetes	Non-Chronic cardiac insufficiency	Chronic liver disease	Non-Chronic renal insufficiency		HP
409	male	76	7168.38	8719.41	8632.2	50591	Death	4	2.2	0.56	50.325	6900	7	23	16.2	567	21.17	26.9	1.2	24	8	Development Cohort	Non-postoperative group	Severe injury	Nonhypertension	Non-Diabetes	Non-Chronic cardiac insufficiency	Non-Chronic liver disease	Chronic renal insufficiency		HI
410	male	83	8908.77	5765.34	9887.97	45980.7	survival	11	7.4	0.05	50.325	201	7	25	12.7	131	15.44	28.9	3.6	20	9	Development Cohort	Non-postoperative group	Physical disease	Hypertension	Diabetes	Non-Chronic cardiac insufficiency	Non-Chronic liver disease	Non-Chronic renal insufficiency		HI
411	female	86	6162.45	8690.46	13174.6	58582.9	Death	9	9.4	0.09	35.35	927	7	13	13	77	12.06	37.5	1.8	20	9	Development Cohort	Non-postoperative group	Physical disease	Hypertension	Non-Diabetes	Non-Chronic cardiac insufficiency	Non-Chronic liver disease	Non-Chronic renal insufficiency		HI
412	male	41	12172.4	6089.07	7729.68	45899	Death	9	3.4	27.02	50.325	1139	404	549	17.6	164	16.3	43.8	4	30	12	Development Cohort	Non-postoperative group	Severe injury	Nonhypertension	Non-Diabetes	Non-Chronic cardiac insufficiency	Chronic liver disease	Non-Chronic renal insufficiency		HI
413	female	18	2270.43	2280.36	13449.8	36011.1	survival	24	17.4	0.07	18.5	179	7	13	6.9	48	3.62	29.1	0.6	17	9	Development Cohort	Non-postoperative group	Physical disease	Nonhypertension	Non-Diabetes	Non-Chronic cardiac insufficiency	Non-Chronic liver disease	Non-Chronic renal insufficiency		HI
414	female	73	4799.79	6026.07	9720.99	42320	survival	8	14	0.52	189.31	433	67	48	8.4	65	7.48	27.8	1.1	26	5	Development Cohort	Non-postoperative group	Physical disease	Hypertension	Non-Diabetes	Non-Chronic cardiac insufficiency	Non-Chronic liver disease	Non-Chronic renal insufficiency		HI
415	female	70	5927.28	8525.73	8503.38	48511.2	survival	7	8.3	0.72	84.99	799	31	21	12	76	7.7	47.3	2.4	20	9	Development Cohort	Non-postoperative group	Postoperative	Hypertension	Diabetes	Chronic cardiac insufficiency	Non-Chronic liver disease	Non-Chronic renal insufficiency		HI
416	female	58	16794.5	9302.7	8654.94	62012.4	Death	13	14.9	105.88	222.06	800	161	289	53.7	160	18.52	34.9	2.2	23	14	Development Cohort	Non-postoperative group	Physical disease	Nonhypertension	Diabetes	Non-Chronic cardiac insufficiency	Non-Chronic liver disease	Non-Chronic renal insufficiency		HI
417	male	23	4709.88	6679.02	8186.58	41120.1	survival	15	6.4	0.44	61.88	318	7	26	12.4	52	2.56	29.4	3	9	9	Development Cohort	Non-postoperative group	Malignant tumor	Nonhypertension	Non-Diabetes	Non-Chronic cardiac insufficiency	Non-Chronic liver disease	Non-Chronic renal insufficiency		MM
418	male	60	5011.26	10198.6	11219.6	58046.4	survival	17	18	6.38	141.52	3079	7	58	18.3	111	9.54	33.3	2	17	5	Development Cohort	Non-postoperative group	Other	Nonhypertension	Non-Diabetes	Non-Chronic cardiac insufficiency	Non-Chronic liver disease	Non-Chronic renal insufficiency		HI
419	female	37	4441.89	6824.55	7818.06	40551.7	survival	8	13.7	0.29	60.32	43	116	74	213.5	68	1.02	180	2.1	21	12	Development Cohort	Non-postoperative group	Physical disease	Nonhypertension	Non-Diabetes	Non-Chronic cardiac insufficiency	Non-Chronic liver disease	Non-Chronic renal insufficiency		MM
420	male	50	3800.61	7399.56	3969.66	33938.6	survival	7	7.6	0.05	60.32	157	7	49	13.3	61	4.5	37.5	0.9	10	4	Development Cohort	Non-postoperative group	Postoperative	Nonhypertension	Non-Diabetes	Non-Chronic cardiac insufficiency	Non-Chronic liver disease	Non-Chronic renal insufficiency		MM
421	male	60	7799.64	12023	6770.61	57409.8	Death	15	3.5	62.39	72.64	2590	1658	2680	249.2	577	24.24	69.9	2.9	21	15	Development Cohort	Non-postoperative group	Physical disease	Hypertension	Diabetes	Non-Chronic cardiac insufficiency	Non-Chronic liver disease	Chronic renal insufficiency		HI
422	male	58	9087.27	17794.8	14629.6	91730.8	Death	17	10.9	0.36	44.15	727	7	13	20	230	14.26	30.6	2.8	14	6	Development Cohort	Non-postoperative group	Physical disease	Hypertension	Non-Diabetes	Chronic cardiac insufficiency	Non-Chronic liver disease	Chronic renal insufficiency		HI
423	female	66	15747.7	23501.8	12347.9	110949	Death	22	23.4	0.05	77.05	3113	7	20	19.2	108	6.64	49.2	8	28	8	Development Cohort	Non-postoperative group	Physical disease	Nonhypertension	Non-Diabetes	Non-Chronic cardiac insufficiency	Non-Chronic liver disease	Chronic renal insufficiency		HP
424	female	69	8817.09	12776.3	8929.62	65005.3	Death	9	14.6	0.31	61.86	549	13	65	27	89	66.31	30	2.8	16	11	Development Cohort	Non-postoperative group	Postoperative	Nonhypertension	Non-Diabetes	Chronic cardiac insufficiency	Non-Chronic liver disease	Non-Chronic renal insufficiency		HI
425	male	70	8586.33	8957.46	32771.7	101002	survival	8	7.2	0.05	4.61	343	19	27	14.2	70	12.56	180	1	29	14	Development Cohort	Non-postoperative group	Physical disease	Nonhypertension	Non-Diabetes	Chronic cardiac insufficiency	Non-Chronic liver disease	Non-Chronic renal insufficiency		HP
426	female	67	21187	13288.1	31767.9	124587	Death	16	11.7	12.65	60.86	359	32	2321	27.6	144	14.82	32.2	3.31	24	11	Development Cohort	Non-postoperative group	Physical disease	Hypertension	Non-Diabetes	Non-Chronic cardiac insufficiency	Non-Chronic liver disease	Non-Chronic renal insufficiency		HP
427	male	36	18495.3	25198	9882.45	113854	Death	28	8	218	77.05	25000	11	37	36.5	359	14.05	44.6	2.2	10	11	Development Cohort	Non-postoperative group	Physical disease	Nonhypertension	Diabetes	Non-Chronic cardiac insufficiency	Non-Chronic liver disease	Chronic renal insufficiency		HP
428	male	47	34321.5	11295.5	15866.9	99941.7	Death	8	20.5	0.64	7.54	372	9	21	3	702	60.45	54.7	1	30	12	Development Cohort	Non-postoperative group	Severe injury	Hypertension	Non-Diabetes	Non-Chronic cardiac insufficiency	Non-Chronic liver disease	Chronic renal insufficiency		HP
429	female	37	8908.71	7302.69	16132.9	63082.6	Death	17	14.3	2.18	50.65	2272	7	94	6.3	98	7.26	36.1	1.8	6	10	Development Cohort	Non-postoperative group	Physical disease	Nonhypertension	Non-Diabetes	Non-Chronic cardiac insufficiency	Non-Chronic liver disease	Non-Chronic renal insufficiency		HI
430	male	60	7260.69	12720.4	21372.6	88167.1	survival	8	12.6	0.3	75	468	28	35	31.3	84	3.79	36.9	0.94	9	10	Development Cohort	Non-postoperative group	Physical disease	Hypertension	Diabetes	Chronic cardiac insufficiency	Non-Chronic liver disease	Non-Chronic renal insufficiency		HI
431	female	76	11369.2	2853.78	15314.7	50560	Death	8	17.7	0.07	17.08	707	7	13	12	309	41.2	24.5	3.5	34	10	Development Cohort	Non-postoperative group	Physical disease	Nonhypertension	Diabetes	Non-Chronic cardiac insufficiency	Non-Chronic liver disease	Non-Chronic renal insufficiency		HI
432	male	47	7929.06	16183.3	8770.95	74020.9	survival	3	10.7	0.56	65.67	869	7	51	71.4	95	12.56	38.7	1.4	10	14	Development Cohort	Non-postoperative group	Physical disease	Hypertension	Non-Diabetes	Non-Chronic cardiac insufficiency	Non-Chronic liver disease	Non-Chronic renal insufficiency		HI
433	male	39	8455.08	8822.52	6370.56	47663.8	survival	22	9.8	101.23	50.325	3387	27	51	86.9	176	20.49	52.2	0.9	15	11	Development Cohort	Non-postoperative group	Physical disease	Nonhypertension	Non-Diabetes	Non-Chronic cardiac insufficiency	Non-Chronic liver disease	Non-Chronic renal insufficiency		HI
434	male	77	10046.5	17648.6	20071.7	103136	Death	11	13.8	0.06	61.26	4517	16	41	19.8	74	9.76	28.9	1.3	15	2	Development Cohort	Non-postoperative group	Physical disease	Nonhypertension	Non-Diabetes	Non-Chronic cardiac insufficiency	Non-Chronic liver disease	Non-Chronic renal insufficiency		HP
435	male	52	5965.41	9066.39	11619.7	56403.9	survival	12	16.1	0.15	238.77	90	7	14	66	69	5.24	30.5	1	9	10	Development Cohort	Non-postoperative group	Postoperative	Nonhypertension	Non-Diabetes	Non-Chronic cardiac insufficiency	Non-Chronic liver disease	Non-Chronic renal insufficiency		HI
436	male	73	7360.11	6632.16	3389.49	34035.6	survival	7	9.3	0.11	1.67	550	7	21	10.3	80	12.56	29.3	2.2	13	3	Development Cohort	Non-postoperative group	Severe injury	Nonhypertension	Non-Diabetes	Non-Chronic cardiac insufficiency	Non-Chronic liver disease	Non-Chronic renal insufficiency		MM
437	male	59	6632.49	10591.8	15740.1	69888.1	Death	9	10.7	7.47	251.68	1685	33	44	30.1	79	12.56	45.7	1.3	19	9	Development Cohort	Non-postoperative group	Malignant tumor	Nonhypertension	Non-Diabetes	Non-Chronic cardiac insufficiency	Non-Chronic liver disease	Non-Chronic renal insufficiency		HI
438	female	60	12770.3	4850.46	10191.5	47704.7	Death	17	13.1	0.05	27.84	109	10	20	19.8	57	3.38	28	2.6	19	9	Development Cohort	Non-postoperative group	Postoperative	Hypertension	Non-Diabetes	Non-Chronic cardiac insufficiency	Non-Chronic liver disease	Non-Chronic renal insufficiency		HI
439	female	62	8168.82	8050.32	30428.1	93176	Death	25	14	1.32	139.79	3161	84	81	16	116	6.76	43.7	0.91	29	1	Development Cohort	Non-postoperative group	Physical disease	Hypertension	Diabetes	Chronic cardiac insufficiency	Chronic liver disease	Chronic renal insufficiency		HP
440	male	53	4572.69	3419.97	4017.21	22867	survival	19	10.5	0.05	5.75	192	29	53	35.1	64	8.98	31.2	1.1	20	8	Development Cohort	Non-postoperative group	Postoperative	Nonhypertension	Non-Diabetes	Non-Chronic cardiac insufficiency	Non-Chronic liver disease	Non-Chronic renal insufficiency		MM
441	male	56	10905.8	11726.9	10637.2	67361	Death	16	1.7	87.74	300	1311	9	41	15.2	212	22.32	69.1	2.4	31	16	Development Cohort	Non-postoperative group	Physical disease	Nonhypertension	Non-Diabetes	Non-Chronic cardiac insufficiency	Non-Chronic liver disease	Non-Chronic renal insufficiency		HI
442	male	72	3589.92	12111	14648	69219.1	survival	10	13.3	0.32	50.325	101	23	57	13.2	83	13.38	28	1.9	10	2	Development Cohort	Non-postoperative group	Postoperative	Nonhypertension	Non-Diabetes	Non-Chronic cardiac insufficiency	Non-Chronic liver disease	Non-Chronic renal insufficiency		HI
443	male	69	7638.63	7440.09	6915.99	43790.9	survival	11	12.3	0.05	0.86	170	34	47	17.8	90	12.56	32.7	2.1	11	10	Development Cohort	Non-postoperative group	Postoperative	Hypertension	Non-Diabetes	Chronic cardiac insufficiency	Non-Chronic liver disease	Non-Chronic renal insufficiency		MM
444	female	66	18522.5	13267.8	27542.2	113410	Death	11	8.7	0.11	113.05	2443	7	89	5.3	150	9.29	43.7	1.6	26	13	Development Cohort	Non-postoperative group	Physical disease	Hypertension	Diabetes	Non-Chronic cardiac insufficiency	Non-Chronic liver disease	Chronic renal insufficiency		HP
445	female	60	4939.83	6174.48	10785.1	45033.5	survival	23	10.1	0.1	16.88	939	64	87	42.7	63	7.59	26	0.74	26	11	Development Cohort	Non-postoperative group	Postoperative	Nonhypertension	Non-Diabetes	Non-Chronic cardiac insufficiency	Non-Chronic liver disease	Non-Chronic renal insufficiency		HI
446	female	68	28932.5	44316.9	17494.5	196872	Death	8	15.7	0.05	1.16	613	7	33	19.2	88	12.56	33.3	4.6	21	13	Development Cohort	Non-postoperative group	Postoperative	Nonhypertension	Non-Diabetes	Chronic cardiac insufficiency	Non-Chronic liver disease	Non-Chronic renal insufficiency		HP
447	female	60	6357.27	5001.12	10700.2	42761	survival	18	10.2	0.05	26.36	1027	8	55	12.2	87	6.58	33.7	2.6	14	9	Development Cohort	Non-postoperative group	Postoperative	Nonhypertension	Non-Diabetes	Chronic cardiac insufficiency	Non-Chronic liver disease	Non-Chronic renal insufficiency		HI
448	male	73	9090.51	11508.5	22516.6	88649.3	Death	10	17.7	0.05	21.17	3819	7	14	23.6	88	4.13	38.3	3.1	22	9	Development Cohort	Non-postoperative group	Physical disease	Nonhypertension	Diabetes	Chronic cardiac insufficiency	Non-Chronic liver disease	Non-Chronic renal insufficiency		HP
449	male	63	6223.32	14381.6	12086.8	73541.8	survival	28	11.7	48.5	86.85	25000	10	35	31.1	182	15.67	31.1	1.3	28	16	Development Cohort	Non-postoperative group	Malignant tumor	Hypertension	Non-Diabetes	Non-Chronic cardiac insufficiency	Non-Chronic liver disease	Chronic renal insufficiency		HI
450	female	51	6909.9	5476.86	10429.6	44199.8	survival	28	18.8	0.14	16.56	1044	12	39	29.1	139	11.66	32.6	1.8	22	0	Development Cohort	Non-postoperative group	Physical disease	Nonhypertension	Non-Diabetes	Non-Chronic cardiac insufficiency	Non-Chronic liver disease	Chronic renal insufficiency		HI
451	male	60	10944.6	19928.2	11655.4	94040	Death	17	16.9	2.88	257	291	39	96	12.7	126	8.44	28.6	1	9	9	Development Cohort	Non-postoperative group	Severe injury	Nonhypertension	Non-Diabetes	Non-Chronic cardiac insufficiency	Non-Chronic liver disease	Non-Chronic renal insufficiency		HP
452	male	59	3607.35	3520.38	3129.18	20426.8	survival	10	7.4	0.43	74.9	2008	45	76	9.8	61	10.51	46.1	1.2	19	6	Development Cohort	Non-postoperative group	Physical disease	Nonhypertension	Non-Diabetes	Non-Chronic cardiac insufficiency	Non-Chronic liver disease	Non-Chronic renal insufficiency		MM
453	female	60	7124.13	12474.6	15186.6	74921	survival	28	8.9	5.01	50.325	8279	232	176	47.2	116	9.58	38.7	3.5	30	13	Development Cohort	Non-postoperative group	Physical disease	Hypertension	Diabetes	Non-Chronic cardiac insufficiency	Non-Chronic liver disease	Chronic renal insufficiency		HI
454	female	62	15017.8	11329.4	12121.5	73249.1	Death	10	32.4	1.61	104.32	307	7	22	79.2	92	71	41.1	1.8	20	9	Development Cohort	Non-postoperative group	Physical disease	Nonhypertension	Non-Diabetes	Non-Chronic cardiac insufficiency	Non-Chronic liver disease	Non-Chronic renal insufficiency		HI
455	female	60	22648.6	12091.3	7656.15	74234.7	Death	9	3.7	156.25	255.83	3307	57	111	17	170	7.63	36.2	1.7	29	4	Development Cohort	Non-postoperative group	Physical disease	Hypertension	Non-Diabetes	Chronic cardiac insufficiency	Non-Chronic liver disease	Chronic renal insufficiency		HP
456	female	71	15432.2	16229.4	9300.18	82720.8	Death	7	17.6	0.05	0.71	273	7	61	30.1	64	12.56	40.3	9.5	28	10	Development Cohort	Non-postoperative group	Postoperative	Hypertension	Non-Diabetes	Chronic cardiac insufficiency	Non-Chronic liver disease	Non-Chronic renal insufficiency		HI
457	male	19	8647.53	5211.15	8889.99	42061	survival	8	24.9	0.21	49.98	3083	7	13	4.8	201	26.15	29	0.5	12	4	Development Cohort	Non-postoperative group	Physical disease	Nonhypertension	Non-Diabetes	Non-Chronic cardiac insufficiency	Non-Chronic liver disease	Chronic renal insufficiency		HI
458	male	50	12138.9	14739.1	12321.8	80999.9	Death	16	12.9	0.05	0.5	272	7	26	21.3	86	12.56	30.9	1.9	20	9	Development Cohort	Non-postoperative group	Postoperative	Nonhypertension	Diabetes	Non-Chronic cardiac insufficiency	Non-Chronic liver disease	Non-Chronic renal insufficiency		HI
459	male	75	2774.52	15849.4	14783.6	79889.9	Death	13	40.8	2.98	83.07	5873	7	40	70.1	158	17.84	46.2	2.4	13	13	Development Cohort	Non-postoperative group	Physical disease	Nonhypertension	Non-Diabetes	Non-Chronic cardiac insufficiency	Chronic liver disease	Chronic renal insufficiency		HI
460	male	67	4028.49	2780.01	3600.93	19570.4	survival	11	9.2	0.06	23.57	1710	11	16	12	47	5.53	27.8	0.5	19	3	Development Cohort	Non-postoperative group	Physical disease	Nonhypertension	Non-Diabetes	Non-Chronic cardiac insufficiency	Non-Chronic liver disease	Non-Chronic renal insufficiency		MM
461	male	64	3286.65	5598.66	9348.21	38779.1	survival	18	14.7	1.31	2.23	61	7	18	13.5	78	7.42	28.8	2.1	28	8	Development Cohort	Non-postoperative group	Postoperative	Hypertension	Non-Diabetes	Non-Chronic cardiac insufficiency	Non-Chronic liver disease	Non-Chronic renal insufficiency		HI
462	female	66	18805.1	31014.6	12977.5	137804	Death	13	15.5	0.22	7.54	389	15	111	20.3	152	12.56	36.7	3.9	8	4	Development Cohort	Non-postoperative group	Postoperative	Hypertension	Non-Diabetes	Chronic cardiac insufficiency	Non-Chronic liver disease	Non-Chronic renal insufficiency		HP
463	male	18	6721.26	5457.39	9075.36	41244.2	survival	7	13	0.41	1.25	31	7	21	2.6	64	4.79	72.5	1.6	30	12	Development Cohort	Non-postoperative group	Physical disease	Nonhypertension	Non-Diabetes	Non-Chronic cardiac insufficiency	Non-Chronic liver disease	Non-Chronic renal insufficiency		HI
464	male	34	3651.03	4162.26	7262.46	30662.7	Death	12	13	140.74	263	368	21	25	37.2	449	9.18	36.7	1.8	21	14	Development Cohort	Non-postoperative group	Physical disease	Hypertension	Diabetes	Non-Chronic cardiac insufficiency	Non-Chronic liver disease	Chronic renal insufficiency		MM
465	female	44	4692.84	6304.59	3937.71	31482	survival	14	14.4	0.66	43.6	468	7	24	13.9	62	2.75	30.6	1.58	13	4	Development Cohort	Non-postoperative group	Physical disease	Nonhypertension	Non-Diabetes	Non-Chronic cardiac insufficiency	Non-Chronic liver disease	Chronic renal insufficiency		MM
466	male	57	11792.8	10291.1	22522.8	87711.7	survival	20	12	3.02	15.19	209	20	40	20.8	138	11.03	34.3	1.5	16	10	Development Cohort	Non-postoperative group	Postoperative	Nonhypertension	Non-Diabetes	Non-Chronic cardiac insufficiency	Non-Chronic liver disease	Non-Chronic renal insufficiency		HP
467	male	60	9478.17	9591.99	9647.4	57548.9	survival	12	12.4	7.42	142.38	3159	7	40	5.8	201	11.68	35.3	0.4	24	6	Development Cohort	Non-postoperative group	Physical disease	Hypertension	Diabetes	Non-Chronic cardiac insufficiency	Non-Chronic liver disease	Chronic renal insufficiency		HI
468	male	26	13747.7	8953.92	11872.8	64355.1	Death	10	20.7	23.49	257.94	288	14	22	35.2	262	9.22	35.7	3.1	32	15	Development Cohort	Non-postoperative group	Physical disease	Nonhypertension	Non-Diabetes	Non-Chronic cardiac insufficiency	Non-Chronic liver disease	Non-Chronic renal insufficiency		HI
469	male	50	9470.13	9472.14	17043.4	71973.4	Death	10	25.5	6.03	36.78	1265	11	40	32	126	12.7	33.6	2.5	31	4	Development Cohort	Non-postoperative group	Physical disease	Nonhypertension	Non-Diabetes	Non-Chronic cardiac insufficiency	Non-Chronic liver disease	Non-Chronic renal insufficiency		HI
470	male	53	8930.37	10173	7581.81	54613	survival	11	13.6	0.08	0.5	1239	7	22	43.7	57	12.56	31.1	1.3	17	12	Development Cohort	Non-postoperative group	Physical disease	Nonhypertension	Diabetes	Chronic cardiac insufficiency	Non-Chronic liver disease	Non-Chronic renal insufficiency		HI
471	female	68	9184.68	9835.89	6852.78	52397.9	Death	10	6.8	7.34	232.57	15296	7	23	40.9	481	23.26	41.4	1.29	21	8	Development Cohort	Non-postoperative group	Physical disease	Nonhypertension	Diabetes	Non-Chronic cardiac insufficiency	Chronic liver disease	Chronic renal insufficiency		HI
472	male	50	2033.07	2284.95	2176.65	13241.2	survival	10	9.5	179.6	3.72	4394	21	21	5.5	88	7.93	40.2	0.95	7	4	Development Cohort	Non-postoperative group	Physical disease	Hypertension	Diabetes	Non-Chronic cardiac insufficiency	Non-Chronic liver disease	Non-Chronic renal insufficiency		LM
473	male	70	5972.43	3497.64	6914.43	30294.2	survival	8	7.1	0.52	3.42	372	18	25	43.5	81	12.56	33.1	0.8	17	5	Development Cohort	Non-postoperative group	Physical disease	Hypertension	Non-Diabetes	Non-Chronic cardiac insufficiency	Non-Chronic liver disease	Non-Chronic renal insufficiency		MM
474	male	61	15914.3	6826.02	10865.9	58124.1	Death	6	19	0.22	0.5	61	34	52	16.4	161	7.58	32.2	2.9	20	9	Development Cohort	Non-postoperative group	Postoperative	Nonhypertension	Non-Diabetes	Non-Chronic cardiac insufficiency	Non-Chronic liver disease	Non-Chronic renal insufficiency		HI
475	male	49	5988.18	4504.08	4736.19	28972.8	survival	24	7	25.21	103.95	3335	59	87	27.5	34	9.47	39.7	1.5	22	10	Development Cohort	Non-postoperative group	Physical disease	Nonhypertension	Non-Diabetes	Non-Chronic cardiac insufficiency	Non-Chronic liver disease	Non-Chronic renal insufficiency		MM
476	male	50	4039.35	4347.63	2874.96	22832.2	survival	9	13	0.05	60.32	80	10	13	23.4	69	6.37	30.6	1.2	20	1	Development Cohort	Non-postoperative group	Severe injury	Nonhypertension	Non-Diabetes	Non-Chronic cardiac insufficiency	Non-Chronic liver disease	Non-Chronic renal insufficiency		MM
477	male	51	6072.51	4759.5	4954.5	30260	survival	15	26.3	0.4	57.27	101	9	13	25.5	64	4.7	24	1.5	28	13	Development Cohort	Non-postoperative group	Physical disease	Nonhypertension	Non-Diabetes	Non-Chronic cardiac insufficiency	Non-Chronic liver disease	Non-Chronic renal insufficiency		MM
478	female	54	6979.32	5001.63	4686.33	31356.9	survival	25	4.7	38.07	60.32	883	7	15	22.6	99	10.84	54.7	1.7	17	10	Development Cohort	Non-postoperative group	Postoperative	Nonhypertension	Non-Diabetes	Non-Chronic cardiac insufficiency	Non-Chronic liver disease	Non-Chronic renal insufficiency		MM
479	male	61	1549.44	4612.92	1788.12	18964.4	survival	10	10.2	0.4	24.54	166	17	42	22.7	78	10.32	27.9	1.1	19	10	Development Cohort	Non-postoperative group	Postoperative	Nonhypertension	Non-Diabetes	Non-Chronic cardiac insufficiency	Non-Chronic liver disease	Non-Chronic renal insufficiency		MM
480	male	67	4253.34	5156.85	4202.34	28128.6	survival	9	9.6	0.3	95.62	288	35	33	22.6	41	3.96	29.8	2.1	42	8	Development Cohort	Non-postoperative group	Physical disease	Hypertension	Non-Diabetes	Non-Chronic cardiac insufficiency	Chronic liver disease	Non-Chronic renal insufficiency		MM
481	female	61	4243.83	4147.62	3409.17	23505	survival	17	12.8	0.17	60.32	706	10	4	7.9	56	4.66	32.2	0.7	23	5	Development Cohort	Non-postoperative group	Postoperative	Hypertension	Non-Diabetes	Non-Chronic cardiac insufficiency	Non-Chronic liver disease	Non-Chronic renal insufficiency		MM
482	male	62	3221.85	4133.67	12581.7	40786.3	survival	9	5.6	0.41	50	352	7	13	5.9	81	4.27	34.2	0.4	7	1	Development Cohort	Non-postoperative group	Malignant tumor	Hypertension	Non-Diabetes	Non-Chronic cardiac insufficiency	Non-Chronic liver disease	Non-Chronic renal insufficiency		HI
483	male	60	26294.8	16377.2	7326.78	90079.9	Death	5	3	0.43	11.57	31	38	51	23.4	113	7.18	35.3	3.3	21	10	Development Cohort	Non-postoperative group	Malignant tumor	Nonhypertension	Non-Diabetes	Non-Chronic cardiac insufficiency	Non-Chronic liver disease	Non-Chronic renal insufficiency		HP
484	female	61	6348.63	5331.93	6231.87	34808.2	survival	28	12.9	31.83	301.9	2326	7	14	24.5	89	10.6	28.4	3	22	8	Development Cohort	Non-postoperative group	Physical disease	Nonhypertension	Non-Diabetes	Non-Chronic cardiac insufficiency	Non-Chronic liver disease	Non-Chronic renal insufficiency		MM
485	female	58	5187.27	2540.1	2813.1	18433.8	survival	28	9.4	0.05	6.67	369	12	21	11.8	57	2.69	35.1	0.8	17	5	Development Cohort	Non-postoperative group	Physical disease	Nonhypertension	Diabetes	Non-Chronic cardiac insufficiency	Non-Chronic liver disease	Non-Chronic renal insufficiency		MM
486	male	32	5965.8	10562.9	5340.12	48334.9	survival	8	16.6	0.05	1.42	18	23	61	19.1	81	12.56	27.1	5.9	12	11	Development Cohort	Non-postoperative group	Postoperative	Nonhypertension	Non-Diabetes	Non-Chronic cardiac insufficiency	Non-Chronic liver disease	Non-Chronic renal insufficiency		HI
487	male	76	8049.57	8313.9	9006.87	51005	survival	28	11.4	0.12	19.75	2397	14	24	18.9	74	4.11	35	1.3	14	4	Development Cohort	Non-postoperative group	Physical disease	Hypertension	Diabetes	Non-Chronic cardiac insufficiency	Non-Chronic liver disease	Non-Chronic renal insufficiency		HI
488	female	19	5977.02	2661.24	2060.61	18082	survival	7	32	1.57	60.32	54	19	33	5	104	5.1	25.7	3.4	32	15	Development Cohort	Non-postoperative group	Physical disease	Nonhypertension	Non-Diabetes	Chronic cardiac insufficiency	Non-Chronic liver disease	Non-Chronic renal insufficiency		MM
489	male	18	1753.14	1895.25	2305.35	12049.6	survival	11	12.8	0.11	31.43	38	40	40	23.3	95	4.89	22.6	1.3	15	4	Development Cohort	Non-postoperative group	Postoperative	Nonhypertension	Non-Diabetes	Non-Chronic cardiac insufficiency	Non-Chronic liver disease	Non-Chronic renal insufficiency		LM
490	male	58	6690.63	8436.9	5509.29	43019.9	survival	6	12.1	0.16	1.13	87	27	33	27.1	95	5.31	30.3	1.5	19	4	Development Cohort	Non-postoperative group	Severe injury	Nonhypertension	Non-Diabetes	Non-Chronic cardiac insufficiency	Non-Chronic liver disease	Non-Chronic renal insufficiency		MM
491	male	43	14334.1	9926.43	13644	71401.4	Death	7	21.5	106.98	229.59	43	36	323	447.9	299	29.19	45.1	8.2	28	3	Development Cohort	Non-postoperative group	Physical disease	Nonhypertension	Non-Diabetes	Non-Chronic cardiac insufficiency	Chronic liver disease	Chronic renal insufficiency		HI
492	female	51	7263.51	7309.83	6678.45	42549.9	survival	12	5.8	0.05	1.24	2595	12	25	15.1	87	12.56	39.2	1.4	10	11	Development Cohort	Non-postoperative group	Postoperative	Nonhypertension	Non-Diabetes	Chronic cardiac insufficiency	Non-Chronic liver disease	Non-Chronic renal insufficiency		MM
493	male	50	5387.55	3784.8	3356.55	23455	survival	28	9.8	0.05	60.32	101	52	36	7.8	58	6.99	26.3	0.97	17	6	Development Cohort	Non-postoperative group	Postoperative	Nonhypertension	Non-Diabetes	Non-Chronic cardiac insufficiency	Non-Chronic liver disease	Non-Chronic renal insufficiency		MM
494	female	78	16359.7	18594.5			survival	6	9.23	0.464	37.68	30000	105	224	12	138.7	5.84	29.8	1.7	20	5	Validation Cohor	Non-postoperative group	Physical disease	Hypertension	Non-Diabetes	Chronic cardiac insufficiency	Chronic liver disease	Chronic renal insufficiency
495	male	86	13029.3	14323.3			survival	6	18.53	100	198.94	25953	93	171	94.2	202.7	13.3	39.9	5.7	21	13	Validation Cohor	Non-postoperative group	Physical disease	Nonhypertension	Non-Diabetes	Chronic cardiac insufficiency	Chronic liver disease	Chronic renal insufficiency
496	male	48	4579.28	8738.3			survival	4	13.83	1.255	83.22	313.04	158	152	116.4	63.5	3.4	26.6	1.3	8	7	Validation Cohor	Non-postoperative group	Physical disease	Nonhypertension	Non-Diabetes	Non-Chronic cardiac insufficiency	Non-Chronic liver disease	Non-Chronic renal insufficiency
497	female	70	18438.8	6303.07			Death	4	13.85	4.422	194.09	1340	21	42	22	61.4	3.86	25	2.8	19	6	Validation Cohor	Non-postoperative group	Physical disease	Hypertension	Non-Diabetes	Non-Chronic cardiac insufficiency	Non-Chronic liver disease	Non-Chronic renal insufficiency
498	female	82	8235.81				survival	2	39.83	3.64	290.19	5321.34	13	16	12.9	194.2	11.96	33	1	23	4	Validation Cohor	Non-postoperative group	Physical disease	Hypertension	Diabetes	Non-Chronic cardiac insufficiency	Non-Chronic liver disease	Chronic renal insufficiency
499	female	82	9248.51	9092.14			survival	2	39.89	3.64	290.19	5321.34	13	16	12.9	194.2	11.96	33	1	13	4	Validation Cohor	Non-postoperative group	Physical disease	Hypertension	Diabetes	Non-Chronic cardiac insufficiency	Non-Chronic liver disease	Chronic renal insufficiency
500	female	29	10434.4	6285.96			survival	20	19.48	0.17	43.67	461.9	51.7	55.6	24.5	27	7.91	27.2	0.7	20	5	Validation Cohor	Non-postoperative group	Severe injury	Nonhypertension	Non-Diabetes	Non-Chronic cardiac insufficiency	Non-Chronic liver disease	Non-Chronic renal insufficiency
501	male	57	12519.8	9098.38			survival	5	9.84	1.07	43.67	14641.8	18.6	35.7	4.3	1101.9	34.61	35.5	0.7	13	7	Validation Cohor	Non-postoperative group	Physical disease	Nonhypertension	Non-Diabetes	Non-Chronic cardiac insufficiency	Non-Chronic liver disease	Non-Chronic renal insufficiency
502	male	88	8516				Death	7	9.5	12.83	80	4182.5	16	29.3	18.6	114.4	13.09	42.7	2.4	30	12	Validation Cohor	Non-postoperative group	Physical disease	Nonhypertension	Non-Diabetes	Non-Chronic cardiac insufficiency	Non-Chronic liver disease	Chronic renal insufficiency
503	female	90	12998.8	7972.5			survival	4	9.06	0.34	159.34	4049.9	37	57	16.5	92	9.8	47.4	2.41	16	7	Validation Cohor	Non-postoperative group	Physical disease	Nonhypertension	Non-Diabetes	Non-Chronic cardiac insufficiency	Non-Chronic liver disease	Non-Chronic renal insufficiency
504	male	91	8516				survival		9.84	2.07	209.38	17549.8	7	21	8.3	120	15.9	42.3	2.84	27	16	Validation Cohor	Non-postoperative group	Physical disease	Nonhypertension	Diabetes	Chronic cardiac insufficiency	Non-Chronic liver disease	Chronic renal insufficiency
505	female	84	8516				survival		8.06	0.62	86.76	35000	61	42	12.7	312	38.6	42.2	1.88	23	11	Validation Cohor	Non-postoperative group	Physical disease	Hypertension	Non-Diabetes	Non-Chronic cardiac insufficiency	Non-Chronic liver disease	Chronic renal insufficiency
506	female	77	8516				Death	2	7.76	0.1	0.5	1383.7	7	35	6.7	59	6.4	31.7	1.15	31	12	Validation Cohor	Non-postoperative group	Physical disease	Nonhypertension	Non-Diabetes	Chronic cardiac insufficiency	Non-Chronic liver disease	Non-Chronic renal insufficiency
507	male	85	8516				Death	6	11.88	5.44	135.63	2946	12	19	24.7	110	28.6	55.2	2.19	29	21	Validation Cohor	Non-postoperative group	Physical disease	Nonhypertension	Non-Diabetes	Chronic cardiac insufficiency	Non-Chronic liver disease	Chronic renal insufficiency
508	male	79	14943.3				survival	13	21.08	1.99	145.9	2081.7	890	447	68.2	204	15.6	31.3	2.03	10	17	Validation Cohor	Non-postoperative group	Physical disease	Nonhypertension	Non-Diabetes	Non-Chronic cardiac insufficiency	Non-Chronic liver disease	Non-Chronic renal insufficiency
509	female	91	11701.6	5751.92			survival		6.44	0.54	48.59	11929.5	12	26	5.6	62	16	33.8	0.55	17	10	Validation Cohor	Non-postoperative group	Physical disease	Nonhypertension	Non-Diabetes	Chronic cardiac insufficiency	Non-Chronic liver disease	Non-Chronic renal insufficiency
510	male	74	7483.4	5330.69			survival	5	10.13	0.97	30.6	2843.9	5	11	6.2	55	6.7	49	0.96	10	10	Validation Cohor	Non-postoperative group	Physical disease	Nonhypertension	Non-Diabetes	Non-Chronic cardiac insufficiency	Non-Chronic liver disease	Non-Chronic renal insufficiency
511	female	77	7960.14	9630.77			survival	7	14.03	0.1	119.66	6691.4	19	26	7.3	55	5.5	31.4	1.34	13	7	Validation Cohor	Non-postoperative group	Physical disease	Nonhypertension	Non-Diabetes	Non-Chronic cardiac insufficiency	Non-Chronic liver disease	Non-Chronic renal insufficiency
512	female	86	23181.2				survival	28	11.15	0.48	43.67	9943.8	39	66	1.9	9	2.2	57.5	3.64	22	5	Validation Cohor	Non-postoperative group	Physical disease	Nonhypertension	Non-Diabetes	Non-Chronic cardiac insufficiency	Non-Chronic liver disease	Non-Chronic renal insufficiency
513	male	82	8516				survival	1	32.32	0.9961	42.3	1626	42.5	17.8	18.9	119.2	11.63	44	1.3	20	5	Validation Cohor	Non-postoperative group	Physical disease	Nonhypertension	Non-Diabetes	Non-Chronic cardiac insufficiency	Chronic liver disease	Non-Chronic renal insufficiency
514	female	82	13328.3				Death	9	14.92	0.208	80	5762	15.6	25.8	5.1	80	9.26	31.5	1.7	21	10	Validation Cohor	Non-postoperative group	Physical disease	Nonhypertension	Non-Diabetes	Chronic cardiac insufficiency	Non-Chronic liver disease	Non-Chronic renal insufficiency
515	female	69	31487				Death	7	0.65	0.517	80	35000	38.2	201.6	156.3	102.2	23.42	43.4	10.8	25	9	Validation Cohor	Non-postoperative group	Physical disease	Nonhypertension	Non-Diabetes	Non-Chronic cardiac insufficiency	Chronic liver disease	Chronic renal insufficiency
516	male	61	4642.34	11328.9			Death	7	0.14	0.673	355	14649	13.6	12.6	75.8	43.5	7.59	56.3	3.2	28	7	Validation Cohor	Non-postoperative group	Physical disease	Nonhypertension	Non-Diabetes	Chronic cardiac insufficiency	Chronic liver disease	Chronic renal insufficiency
517	male	84	18761.9	25357.4			Death	10	17.18	0.264	80	5525	21.4	31.2	15.7	155	23.36	25.8	2	17	4	Validation Cohor	Non-postoperative group	Physical disease	Nonhypertension	Non-Diabetes	Chronic cardiac insufficiency	Non-Chronic liver disease	Chronic renal insufficiency
518	female	83	17127.1				Death	3	16.28	1.916	80	8165	37.7	90.4	33.3	147.9	19.78	38.3	2	25	11	Validation Cohor	Non-postoperative group	Physical disease	Nonhypertension	Non-Diabetes	Chronic cardiac insufficiency	Non-Chronic liver disease	Chronic renal insufficiency
519	male	32	14719.5	14884.9			Death	6	24.27	3.9976	59.3	10041	43.7	113.9	17.8	434.1	49.49	35.4	2	19	7	Validation Cohor	Non-postoperative group	Physical disease	Nonhypertension	Non-Diabetes	Chronic cardiac insufficiency	Non-Chronic liver disease	Chronic renal insufficiency
520	male	91	4088.84	8115.82			Death	3	20.21	0.501	80	1156	40.9	51.1	14.6	87	8.77	34.3	1.2	20	8	Validation Cohor	Non-postoperative group	Physical disease	Nonhypertension	Non-Diabetes	Chronic cardiac insufficiency	Non-Chronic liver disease	Non-Chronic renal insufficiency
521	male	74	16194.3				Death	3	21.23	0.324	80	241.5	87.1	38.5	28.1	89.8	16.7	25.1	2.7	12	6	Validation Cohor	Non-postoperative group	Physical disease	Nonhypertension	Non-Diabetes	Chronic cardiac insufficiency	Non-Chronic liver disease	Chronic renal insufficiency
522	male	75	8336.48	19789.4			Death	19	11.42	3	166	215.3	57	40	6.9	51.6	6.34	29.2	0.8	13	4	Validation Cohor	Non-postoperative group	Malignant tumor	Nonhypertension	Non-Diabetes	Non-Chronic cardiac insufficiency	Non-Chronic liver disease	Chronic renal insufficiency
523	male	47	2011.12	5615.08			survival	10	8.96	0.21	90	5542.7	78.7	80.8	29.62	52.8	3.46	26.3	1.3	2	1	Validation Cohor	Non-postoperative group	Physical disease	Nonhypertension	Non-Diabetes	Non-Chronic cardiac insufficiency	Non-Chronic liver disease	Non-Chronic renal insufficiency
524	male	81	11074.5	10996.4			Death	5	21.72	0.07	8.11	3702	24.3	16.3	12.5	94.2	24.46	29.5	1.2	14	6	Validation Cohor	Non-postoperative group	Physical disease	Nonhypertension	Non-Diabetes	Non-Chronic cardiac insufficiency	Non-Chronic liver disease	Non-Chronic renal insufficiency
525	male	59	20922.9	43565.6			Death	12	13.6	0.422	117	1239	588.6	1153	10.1	54.7	3.36	31.9	1.4	15	8	Validation Cohor	Non-postoperative group	Malignant tumor	Nonhypertension	Diabetes	Non-Chronic cardiac insufficiency	Chronic liver disease	Non-Chronic renal insufficiency
526	female	54	19052				survival	20	8.25	71.8	43.67	1531	165.6	79.6	11.8	324.1	13.93	51.7	1.3	22	11	Validation Cohor	Non-postoperative group	Physical disease	Nonhypertension	Non-Diabetes	Non-Chronic cardiac insufficiency	Non-Chronic liver disease	Non-Chronic renal insufficiency
527	male	43	10465.2				survival	12	12.82	1.9319	43.67	23295.2	29	46	101.3	121.6	7.93	30.1	1.3	19	8	Validation Cohor	Non-postoperative group	Severe injury	Nonhypertension	Non-Diabetes	Chronic cardiac insufficiency	Non-Chronic liver disease	Non-Chronic renal insufficiency
528	male	57	2617.98				survival	20	24.21	0.23	89.9	3903.07	138.9	97.4	4.3	56.8	13.83	30.1	1.3	7	3	Validation Cohor	Non-postoperative group	Physical disease	Nonhypertension	Non-Diabetes	Non-Chronic cardiac insufficiency	Non-Chronic liver disease	Non-Chronic renal insufficiency
529	male	84	45572.4	78129.8			Death	4	9.71	0.787	80	5080	22.8	90.3	16.5	182.8	26.12	66.4	1.1	19	15	Validation Cohor	Non-postoperative group	Physical disease	Nonhypertension	Non-Diabetes	Non-Chronic cardiac insufficiency	Non-Chronic liver disease	Non-Chronic renal insufficiency
530	male	20	2069.12	1892.83			survival	13	21.51	1.08	90	18118	23.5	17.8	25.2	93	5.04	36	1.3	7	7	Validation Cohor	Non-postoperative group	Physical disease	Nonhypertension	Non-Diabetes	Non-Chronic cardiac insufficiency	Chronic liver disease	Non-Chronic renal insufficiency
531	male	66	2805.7				Death	1	12.51	1.388	90	656.8	188	391.9	28.5	71.9	9.58	31	1.52	12	6	Validation Cohor	Non-postoperative group	Physical disease	Nonhypertension	Non-Diabetes	Non-Chronic cardiac insufficiency	Non-Chronic liver disease	Non-Chronic renal insufficiency
532	male	37	1650.91	2359.82			survival	4	6.68	19.34	43.67	3903.07	46.6	64.7	91.4	50.1	2.08	38.7	1.3	4	3	Validation Cohor	Non-postoperative group	Physical disease	Nonhypertension	Non-Diabetes	Non-Chronic cardiac insufficiency	Chronic liver disease	Non-Chronic renal insufficiency
533	female	70	1031.8	2151.36			survival	7	10.21	5.78	78	3903.07	11.6	20.6	7.2	36.2	5.2	28.1	1.3	9	3	Validation Cohor	Non-postoperative group	Physical disease	Nonhypertension	Non-Diabetes	Non-Chronic cardiac insufficiency	Chronic liver disease	Non-Chronic renal insufficiency
534	female	56	6773.03				survival	15	4.81	0.127	43.67	626	12.9	14.5	11.9	71.2	8.59	25.6	1.7	18	9	Validation Cohor	Non-postoperative group	Physical disease	Hypertension	Non-Diabetes	Non-Chronic cardiac insufficiency	Non-Chronic liver disease	Non-Chronic renal insufficiency
535	male	60	52243.4				Death	4	8.31	2.62	122	302.2	70.6	269	238.6	86.8	8.69	53.9	15	22	16	Validation Cohor	Non-postoperative group	Physical disease	Nonhypertension	Non-Diabetes	Chronic cardiac insufficiency	Chronic liver disease	Chronic renal insufficiency
536	female	73	5589.16	3027			survival	4	1.99	31.43	43.67	2983	13.5	24.7	35.4	167.5	16.29	29.9	2.1	24	7	Validation Cohor	Non-postoperative group	Physical disease	Nonhypertension	Non-Diabetes	Non-Chronic cardiac insufficiency	Non-Chronic liver disease	Chronic renal insufficiency
537	female	65	1966.98	1592.09			survival	12	10.23	0.11	15.3	1406.6	19	22	8.1	43.1	6.29	21.5	0.96	17	5	Validation Cohor	Non-postoperative group	Physical disease	Nonhypertension	Non-Diabetes	Non-Chronic cardiac insufficiency	Non-Chronic liver disease	Non-Chronic renal insufficiency
538	male	39	1051.15				survival	2	10.13	19.34	43.67	52.72	14.6	29.5	34.6	42.8	5.71	31.8	1.3	4	2	Validation Cohor	Non-postoperative group	Physical disease	Hypertension	Non-Diabetes	Non-Chronic cardiac insufficiency	Non-Chronic liver disease	Non-Chronic renal insufficiency
539	male	53	5353.4	3007.76			survival	5	14.38	1.6142	43.67	3903.07	11.5	27.2	18.5	10.7	6.15	30.8	1.3	15	4	Validation Cohor	Non-postoperative group	Physical disease	Nonhypertension	Non-Diabetes	Non-Chronic cardiac insufficiency	Non-Chronic liver disease	Non-Chronic renal insufficiency
540	male	36	938.892	1084.6			survival	7	9.38	19.34	342	34.32	35.7	34.6	17.8	57.6	4.66	38.3	1.3	2	2	Validation Cohor	Non-postoperative group	Physical disease	Nonhypertension	Non-Diabetes	Non-Chronic cardiac insufficiency	Non-Chronic liver disease	Non-Chronic renal insufficiency
541	male	40	12693.7	23551.9			survival	20	8.61	0.485	9.06	2505	9	17.4	5	791.6	39.71	23.5	1	27	9	Validation Cohor	Non-postoperative group	Physical disease	Nonhypertension	Non-Diabetes	Chronic cardiac insufficiency	Non-Chronic liver disease	Chronic renal insufficiency
542	female	72	19809.7				Death	5	12.32	0.295	80	7546	96.8	68	34	33.1	6.01	35.2	1.1	29	12	Validation Cohor	Non-postoperative group	Physical disease	Nonhypertension	Non-Diabetes	Chronic cardiac insufficiency	Chronic liver disease	Non-Chronic renal insufficiency
543	male	88	16373.8				Death	5	20.19	2.43	80	2108	15	39.8	8.8	376	41.49	26.4	1.3	30	13	Validation Cohor	Non-postoperative group	Physical disease	Nonhypertension	Diabetes	Non-Chronic cardiac insufficiency	Non-Chronic liver disease	Chronic renal insufficiency
544	female	52	964.898				survival	85	10.62	19.34	51.9	451.9	4.8	7.8	5.4	20	3.1	25.1	1.3	9	3	Validation Cohor	Non-postoperative group	Physical disease	Nonhypertension	Non-Diabetes	Non-Chronic cardiac insufficiency	Chronic liver disease	Non-Chronic renal insufficiency
545	male	51	25000	25000			survival	16	11.02	0.125	43.67	3903.07	13.4	22.4	6.6	75.7	6.88	30.9	1.3	15	4	Validation Cohor	Non-postoperative group	Severe injury	Nonhypertension	Non-Diabetes	Non-Chronic cardiac insufficiency	Non-Chronic liver disease	Non-Chronic renal insufficiency
546	male	26	2352.62				survival	6	14.79	1.4782	43.67	3903.07	104.6	67.9	29.8	51.2	5.63	28.7	1.3	4	2	Validation Cohor	Non-postoperative group	Physical disease	Nonhypertension	Non-Diabetes	Non-Chronic cardiac insufficiency	Non-Chronic liver disease	Non-Chronic renal insufficiency
547	male	82	25000	3685.94			survival	15	7.17	17.7504	81.3	3903.07	221.8	533.1	12.8	122.7	14.75	83.6	2	20	8	Validation Cohor	Non-postoperative group	Severe injury	Nonhypertension	Non-Diabetes	Chronic cardiac insufficiency	Chronic liver disease	Chronic renal insufficiency
548	male	44	27082	2243.5			survival	28	14.21	0.156	43.67	338.2	69.1	133.5	14.6	76.4	5.19	23.8	0.5	13	1	Validation Cohor	Non-postoperative group	Severe injury	Nonhypertension	Non-Diabetes	Non-Chronic cardiac insufficiency	Chronic liver disease	Non-Chronic renal insufficiency
549	male	57	3546.56				survival	22	11.59	0.119	43.67	3903.07	14.6	22.3	41.4	57.5	3.83	24.3	1.3	15	4	Validation Cohor	Non-postoperative group	Severe injury	Nonhypertension	Non-Diabetes	Non-Chronic cardiac insufficiency	Non-Chronic liver disease	Non-Chronic renal insufficiency
550	female	68	2512.28				survival	5	17.39	0.406	43.67	273.4	26.1	17.6	18.9	32.7	4.82	28.8	1.3	7	2	Validation Cohor	Non-postoperative group	Physical disease	Nonhypertension	Non-Diabetes	Non-Chronic cardiac insufficiency	Non-Chronic liver disease	Non-Chronic renal insufficiency
551	female	73	4214.18				survival	2	7.68	0.0435	43.67	441.3	9.2	18.1	7.1	64.5	7.58	25.8	1.3	15	5	Validation Cohor	Non-postoperative group	Physical disease	Nonhypertension	Non-Diabetes	Non-Chronic cardiac insufficiency	Non-Chronic liver disease	Non-Chronic renal insufficiency
552	male	41	6828.58	9924.54			Death	7	16.9	53.31	80	8947	176.3	258.7	19	113.3	15.85	51.7	2.1	16	8	Validation Cohor	Non-postoperative group	Malignant tumor	Hypertension	Non-Diabetes	Non-Chronic cardiac insufficiency	Non-Chronic liver disease	Non-Chronic renal insufficiency
553	male	25	716.76	819.006			survival	7	8.5	2.1	43.67	96.28	11.9	51.5	33.9	58.7	4.23	23.5	1.3	2	3	Validation Cohor	Non-postoperative group	Physical disease	Nonhypertension	Diabetes	Non-Chronic cardiac insufficiency	Non-Chronic liver disease	Non-Chronic renal insufficiency
554	male	73	2635.76	2145.61			survival	5	6.64	0.24	43.67	4193.5	16.4	27.4	11.4	42.8	7.34	38.6	1.3	27	3	Validation Cohor	Non-postoperative group	Physical disease	Nonhypertension	Non-Diabetes	Non-Chronic cardiac insufficiency	Non-Chronic liver disease	Non-Chronic renal insufficiency
555	male	59	5851.84				survival	6	13.56	19.34	43.67	166.8	490.1	444.3	41.7	102.1	5.23	31.7	1.3	15	8	Validation Cohor	Non-postoperative group	Malignant tumor	Nonhypertension	Diabetes	Non-Chronic cardiac insufficiency	Non-Chronic liver disease	Non-Chronic renal insufficiency
556	female	48	1208.42	1392.73			survival	13	12.66	0.1	43.67	246.4	18.8	81.8	3.7	38.3	2.93	23.6	1.3	7	1	Validation Cohor	Non-postoperative group	Physical disease	Nonhypertension	Non-Diabetes	Non-Chronic cardiac insufficiency	Non-Chronic liver disease	Non-Chronic renal insufficiency
557	female	29	1723.83	914.722			survival	3	9.51	19.34	43.67	3903.07	47.7	45.9	5.9	46.1	4.18	30.9	1.3	14	5	Validation Cohor	Non-postoperative group	Physical disease	Nonhypertension	Non-Diabetes	Non-Chronic cardiac insufficiency	Non-Chronic liver disease	Non-Chronic renal insufficiency
558	male	36	3377.34	1421.96			survival	6	8.28	19.34	43.67	3903.07	59	84.1	31.1	53.6	5.89	28.1	1.3	3	2	Validation Cohor	Non-postoperative group	Physical disease	Nonhypertension	Non-Diabetes	Non-Chronic cardiac insufficiency	Non-Chronic liver disease	Non-Chronic renal insufficiency
559	female	37	8516				survival	12	6.79	19.34	28.8	2710	803.4	600	29.62	97.9	12.7	31.5	1.3	6	3	Validation Cohor	Non-postoperative group	Physical disease	Nonhypertension	Non-Diabetes	Non-Chronic cardiac insufficiency	Non-Chronic liver disease	Chronic renal insufficiency
560	male	83	16851.5	5228.28			Death	40	9.46	0.109	80	4718	16.5	19.4	8.3	78.5	14.5	27.9	1.1	37	7	Validation Cohor	Non-postoperative group	Physical disease	Hypertension	Non-Diabetes	Non-Chronic cardiac insufficiency	Non-Chronic liver disease	Non-Chronic renal insufficiency
561	male	80	18770.8	20636.2			Death	6	20.9	3.73	262	7731	7.6	28.8	12.4	124.4	21.63	34.9	0.55	29	10	Validation Cohor	Non-postoperative group	Severe injury	Nonhypertension	Non-Diabetes	Chronic cardiac insufficiency	Non-Chronic liver disease	Chronic renal insufficiency
562	male	55	8516	33839.6			Death	3	23.17	17.51	80	11096	425.8	3454	70.5	208.4	14.27	84.4	15	36	19	Validation Cohor	Non-postoperative group	Severe injury	Nonhypertension	Non-Diabetes	Non-Chronic cardiac insufficiency	Chronic liver disease	Non-Chronic renal insufficiency
563	male	78	5775.52	3787.68			survival	10	12.2	16.63	65.5	3353.2	65.2	72.9	17.6	125.4	12.03	32.9	1.3	7	2	Validation Cohor	Non-postoperative group	Physical disease	Hypertension	Diabetes	Chronic cardiac insufficiency	Non-Chronic liver disease	Non-Chronic renal insufficiency
564	female	71	798.916				Death	1	13.14	0.176	80	472.6	19.7	21.6	10.5	56	5.05	23.7	0.5	20	7	Validation Cohor	Non-postoperative group	Physical disease	Hypertension	Diabetes	Non-Chronic cardiac insufficiency	Non-Chronic liver disease	Non-Chronic renal insufficiency
565	male	70	2488.98	1904.55			survival	17	16.54	0.048	43.67	3903.07	32.1	42.7	15.6	41.6	4.56	22.9	4.6	20	5	Validation Cohor	Non-postoperative group	Physical disease	Nonhypertension	Non-Diabetes	Non-Chronic cardiac insufficiency	Non-Chronic liver disease	Non-Chronic renal insufficiency
566	female	35	6287.44				survival	2	18.9	0.489	43.67	3903.07	47.5	63.2	19.6	90.6	9.79	32.9	1.3	8	1	Validation Cohor	Non-postoperative group	Physical disease	Nonhypertension	Non-Diabetes	Non-Chronic cardiac insufficiency	Non-Chronic liver disease	Chronic renal insufficiency
567	male	51	5899.32	1571.46			survival	2	5.18	1.3171	43.67	3903.07	27.7	27.2	7.6	23.9	5.31	33	1.3	5	1	Validation Cohor	Non-postoperative group	Physical disease	Hypertension	Non-Diabetes	Non-Chronic cardiac insufficiency	Non-Chronic liver disease	Non-Chronic renal insufficiency
568	female	68	8829.01	11708.7			survival	9	5.82	19.34	43.67	2411	64.92	117.69	29.62	154.1	12.56	26.3	1.3	8	3	Validation Cohor	Non-postoperative group	Physical disease	Hypertension	Non-Diabetes	Non-Chronic cardiac insufficiency	Non-Chronic liver disease	Non-Chronic renal insufficiency
569	female	67	2759.49				survival	11	6.08	19.34	43.67	592.2	77.8	117.69	29.62	154.1	12.56	27.1	1.3	9	4	Validation Cohor	Non-postoperative group	Physical disease	Nonhypertension	Non-Diabetes	Non-Chronic cardiac insufficiency	Chronic liver disease	Non-Chronic renal insufficiency
570	male	92	25000	25000			survival	90	13.35	2.93	43.67	7643	64.92	117.69	29.62	154.1	12.56	44.2	1.3	15	5	Validation Cohor	Non-postoperative group	Malignant tumor	Nonhypertension	Non-Diabetes	Non-Chronic cardiac insufficiency	Non-Chronic liver disease	Non-Chronic renal insufficiency
571	male	37	8516				survival	12	4.64	11.49	243	395.9	42	38.6	29.62	154.1	12.56	26.4	1.3	15	6	Validation Cohor	Non-postoperative group	Physical disease	Nonhypertension	Non-Diabetes	Non-Chronic cardiac insufficiency	Chronic liver disease	Non-Chronic renal insufficiency
572	male	68	8516				Death	21	6.07	5.46	80	671.8	35.3	109.4	12.1	91.5	9.02	34.3	2	14	6	Validation Cohor	Non-postoperative group	Physical disease	Nonhypertension	Non-Diabetes	Non-Chronic cardiac insufficiency	Chronic liver disease	Chronic renal insufficiency
573	female	72	1855.52	10385.3			Death	10	10.67	0.111	80	1032	7.8	21.7	17.2	56.2	7.37	25.4	0.5	41	8	Validation Cohor	Non-postoperative group	Physical disease	Nonhypertension	Non-Diabetes	Chronic cardiac insufficiency	Non-Chronic liver disease	Chronic renal insufficiency
574	male	73	6163.56				survival	43	16.08	2.0754	43.67	2431.4	23.9	40.2	24.6	57.7	7.48	33.8	1.3	15	7	Validation Cohor	Non-postoperative group	Physical disease	Nonhypertension	Non-Diabetes	Non-Chronic cardiac insufficiency	Chronic liver disease	Chronic renal insufficiency
575	male	85	3431.22				survival	2	4.45	0.069	43.67	2655.2	19.5	31.6	13.2	78	9.08	27	1.14	10	2	Validation Cohor	Non-postoperative group	Physical disease	Nonhypertension	Non-Diabetes	Non-Chronic cardiac insufficiency	Non-Chronic liver disease	Non-Chronic renal insufficiency
576	female	86	15115.2	5366.88			Death	4	11.08	19.1116	190	3903.07	13.9	20.4	23.8	127.7	13.59	39.7	2	30	15	Validation Cohor	Non-postoperative group	Physical disease	Nonhypertension	Non-Diabetes	Chronic cardiac insufficiency	Non-Chronic liver disease	Non-Chronic renal insufficiency
577	male	75	8516				Death	3	7.83	28.81	80	2862	36.7	70.2	11.4	187.1	23.33	36.6	1	25	10	Validation Cohor	Non-postoperative group	Physical disease	Nonhypertension	Non-Diabetes	Chronic cardiac insufficiency	Non-Chronic liver disease	Chronic renal insufficiency
578	female	52	2215.76	2037.92			survival	10	9.31	0.62	43.67	183.6	24.4	21	12.9	33.7	8.75	29.2	1	23	4	Validation Cohor	Non-postoperative group	Physical disease	Nonhypertension	Diabetes	Non-Chronic cardiac insufficiency	Non-Chronic liver disease	Non-Chronic renal insufficiency
579	male	65	30968.2				Death	2	43.98	12.37	87.2	13780	387.4	1210.1	30.2	175	28.32	111.2	10.95	34	16	Validation Cohor	Non-postoperative group	Physical disease	Hypertension	Non-Diabetes	Non-Chronic cardiac insufficiency	Non-Chronic liver disease	Non-Chronic renal insufficiency
580	male	75	18022.2				survival	14	13.12	2.38	43.67	536.1	26.2	47.2	4.7	37.3	4.57	29.6	0.9	25	3	Validation Cohor	Non-postoperative group	Malignant tumor	Hypertension	Non-Diabetes	Non-Chronic cardiac insufficiency	Non-Chronic liver disease	Non-Chronic renal insufficiency
581	male	32	5553.72	6160.6			Death	23	4.4	19.34	80	25.37	44.1	72.3	17	78.1	6.11	30.3	2	12	3	Validation Cohor	Non-postoperative group	Physical disease	Nonhypertension	Non-Diabetes	Chronic cardiac insufficiency	Non-Chronic liver disease	Non-Chronic renal insufficiency
582	female	77	3623.8				Death	16	8.13	0.575	80	509.6	11.8	22.5	4.9	58.2	8.38	25.8	0.5	46	10	Validation Cohor	Non-postoperative group	Physical disease	Nonhypertension	Non-Diabetes	Chronic cardiac insufficiency	Non-Chronic liver disease	Chronic renal insufficiency
583	male	80	4248.36	6858			Death	8	14.19	0.354	22.8	3168	49.7	50.4	29.62	101.2	18.16	27	2	15	8	Validation Cohor	Non-postoperative group	Physical disease	Hypertension	Non-Diabetes	Chronic cardiac insufficiency	Non-Chronic liver disease	Non-Chronic renal insufficiency
584	male	66	2578.92				survival	7	12.53	2.2711	269	428.1	13	33.1	8.9	65.1	5.59	34.6	1.3	5	2	Validation Cohor	Non-postoperative group	Physical disease	Nonhypertension	Non-Diabetes	Non-Chronic cardiac insufficiency	Non-Chronic liver disease	Non-Chronic renal insufficiency
585	female	72	2019.16	1821.38			survival	14	16.53	1.67	43.67	908.6	29.3	45.9	16.9	41.1	7.76	35.6	1.3	9	1	Validation Cohor	Non-postoperative group	Physical disease	Nonhypertension	Non-Diabetes	Non-Chronic cardiac insufficiency	Non-Chronic liver disease	Non-Chronic renal insufficiency
586	male	69	8516				Death	5	11.49	5.38	54.8	10535.5	23.9	34.8	32.1	63.3	13.83	53.8	2.89	28	11	Validation Cohor	Non-postoperative group	Physical disease	Nonhypertension	Non-Diabetes	Chronic cardiac insufficiency	Non-Chronic liver disease	Non-Chronic renal insufficiency
587	female	86	9562.02	7065.36			Death	19	7.51	1.9809	80	3905	30.3	27.9	19.8	74.9	7.41	31.2	2	23	8	Validation Cohor	Non-postoperative group	Physical disease	Nonhypertension	Non-Diabetes	Non-Chronic cardiac insufficiency	Non-Chronic liver disease	Non-Chronic renal insufficiency
588	male	38	2057.46				survival	8	6.8	19.34	214	2740	28.1	25.7	40.1	186.4	16.11	33.7	1.3	7	7	Validation Cohor	Non-postoperative group	Physical disease	Nonhypertension	Non-Diabetes	Non-Chronic cardiac insufficiency	Non-Chronic liver disease	Chronic renal insufficiency
589	male	76	3380.79				survival	3	14.69	19.34	6.6	1557	15.5	23	12.2	26.4	8.19	23.1	1.3	12	2	Validation Cohor	Non-postoperative group	Physical disease	Nonhypertension	Non-Diabetes	Non-Chronic cardiac insufficiency	Non-Chronic liver disease	Non-Chronic renal insufficiency
590	male	32	3160.3	2198.06			survival	8	9.2	0.5038	43.67	3903.07	41.5	29	13.7	81.9	4.94	30.1	1.3	4	1	Validation Cohor	Non-postoperative group	Physical disease	Nonhypertension	Non-Diabetes	Non-Chronic cardiac insufficiency	Non-Chronic liver disease	Non-Chronic renal insufficiency
591	male	67	19593.9	2.4191			survival	19	14.5	5.7234	43.67	1604	42.3	59.2	16.9	427.5	26.46	38.3	1.3	8	4	Validation Cohor	Non-postoperative group	Physical disease	Nonhypertension	Non-Diabetes	Non-Chronic cardiac insufficiency	Chronic liver disease	Chronic renal insufficiency
592	male	28	2.3358	0.8337			survival	43	13.64	93.94	43.67	2117	27.6	57.1	35.9	56.5	10.87	44.8	1.3	15	7	Validation Cohor	Non-postoperative group	Physical disease	Nonhypertension	Non-Diabetes	Non-Chronic cardiac insufficiency	Non-Chronic liver disease	Non-Chronic renal insufficiency
593	male	67	8315.09	5126.53			survival	21	14.32	9.6601	228	4474.7	18.2	30	21.3	78.5	8.94	29.2	1.3	6	4	Validation Cohor	Non-postoperative group	Physical disease	Nonhypertension	Non-Diabetes	Chronic cardiac insufficiency	Non-Chronic liver disease	Non-Chronic renal insufficiency
594	male	52	2.6636				Death	18	11.44	73.7779	80	17794	18.4	30.3	200.4	343.2	33.99	71.4	2	15	9	Validation Cohor	Non-postoperative group	Physical disease	Nonhypertension	Diabetes	Non-Chronic cardiac insufficiency	Non-Chronic liver disease	Non-Chronic renal insufficiency
595	male	60	5674.58	5089.19			survival	21	28.62	23.4264	90	582.7	11.6	35	9.9	115.7	13.5	26.7	1.81	21	6	Validation Cohor	Non-postoperative group	Physical disease	Hypertension	Diabetes	Non-Chronic cardiac insufficiency	Non-Chronic liver disease	Chronic renal insufficiency
596	female	61	4559.72	3751.65			survival	13	14.19	16.45	43.67	34257.3	10.2	16.1	29.62	380.6	38.06	38.7	1.3	8	4	Validation Cohor	Non-postoperative group	Physical disease	Hypertension	Diabetes	Chronic cardiac insufficiency	Non-Chronic liver disease	Chronic renal insufficiency
597	male	25	1.6466	1.202			Death	8	12.99	19.34	80	3903.07	10	26.3	17.7	72.6	11.96	34.2	2	21	8	Validation Cohor	Non-postoperative group	Physical disease	Nonhypertension	Non-Diabetes	Non-Chronic cardiac insufficiency	Non-Chronic liver disease	Non-Chronic renal insufficiency
598	male	41	0.9001	0.8639			survival	5	10.44	4.5831	302	3903.07	16.9	33.3	25.4	54	9.41	26.9	1.3	4	1	Validation Cohor	Non-postoperative group	Physical disease	Nonhypertension	Diabetes	Non-Chronic cardiac insufficiency	Non-Chronic liver disease	Non-Chronic renal insufficiency
599	male	70	8516				survival	15	12.51	19.34	43.67	3903.07	13.5	28.9	29.62	52.7	3.32	27.9	1.3	17	5	Validation Cohor	Non-postoperative group	Severe injury	Nonhypertension	Non-Diabetes	Non-Chronic cardiac insufficiency	Non-Chronic liver disease	Non-Chronic renal insufficiency
600	male	53	1.3071				Death	4	5.78	0.105	79	23.69	16.5	32.3	9.8	45.2	7.51	34.4	0.7	52	5	Validation Cohor	Non-postoperative group	Physical disease	Nonhypertension	Non-Diabetes	Non-Chronic cardiac insufficiency	Non-Chronic liver disease	Non-Chronic renal insufficiency
601	female	63	3780.97	1947.8			survival	5	8.82	0.94	43.67	79.8	38.6	41.8	13.1	42.1	4.37	27.7	1.3	6	4	Validation Cohor	Non-postoperative group	Physical disease	Nonhypertension	Diabetes	Non-Chronic cardiac insufficiency	Non-Chronic liver disease	Non-Chronic renal insufficiency
602	female	35	1.1781	0.7053			survival	4	15.43	0.7528	257	3903.07	26.6	26.3	15.5	65.6	7.59	28.5	1.3	13	1	Validation Cohor	Non-postoperative group	Physical disease	Nonhypertension	Diabetes	Non-Chronic cardiac insufficiency	Non-Chronic liver disease	Non-Chronic renal insufficiency
603	male	60	2.0213	1.7596			survival	4	11.56	0.7392	43.67	156.3	26	54	450.7	64	5.08	29	1.3	20	5	Validation Cohor	Non-postoperative group	Malignant tumor	Nonhypertension	Non-Diabetes	Non-Chronic cardiac insufficiency	Non-Chronic liver disease	Non-Chronic renal insufficiency
604	male	69	5224.12	3222.4			survival	9	9.41	0.179	43.67	738.7	20.4	36.9	12.5	66.7	11.35	24.1	1	14	3	Validation Cohor	Non-postoperative group	Physical disease	Nonhypertension	Diabetes	Chronic cardiac insufficiency	Non-Chronic liver disease	Non-Chronic renal insufficiency
605	female	78	2990.22	3899.08			survival	50	21.28	0.146	83.5	4034	35	49	9	80.6	9.7	28.8	2.4	15	10	Validation Cohor	Non-postoperative group	Severe injury	Nonhypertension	Non-Diabetes	Chronic cardiac insufficiency	Non-Chronic liver disease	Chronic renal insufficiency
606	male	75	9378.18	6941.8			survival	41	6	0.076	43.67	7630	23.2	25.4	4.8	38.7	9.3	27.8	0.9	26	11	Validation Cohor	Non-postoperative group	Physical disease	Hypertension	Non-Diabetes	Chronic cardiac insufficiency	Non-Chronic liver disease	Non-Chronic renal insufficiency
607	female	62	1.2947				survival	8	2.78	6.06	43.67	19021	36.7	31.8	15.4	28.1	5.43	31.7	1.8	12	3	Validation Cohor	Non-postoperative group	Physical disease	Nonhypertension	Non-Diabetes	Chronic cardiac insufficiency	Non-Chronic liver disease	Non-Chronic renal insufficiency
608	female	38	1.73				survival	5	17.03	0.798	43.67	3861	12.9	13.2	11.7	42.8	4.63	35.2	1.3	20	8	Validation Cohor	Non-postoperative group	Physical disease	Nonhypertension	Non-Diabetes	Non-Chronic cardiac insufficiency	Non-Chronic liver disease	Non-Chronic renal insufficiency
609	male	21	0.8949				survival	23	12.19	7.0025	43.67	3903.07	15.3	19.7	46.5	67.1	5.22	29.3	1.3	5	3	Validation Cohor	Non-postoperative group	Physical disease	Nonhypertension	Non-Diabetes	Non-Chronic cardiac insufficiency	Non-Chronic liver disease	Non-Chronic renal insufficiency
610	female	52	9269.07	7380.87			survival	4	5.65	19.34	208	4289.6	10.4	20.4	2.2	1219.7	15.86	31.4	1.3	15	8	Validation Cohor	Non-postoperative group	Physical disease	Nonhypertension	Non-Diabetes	Chronic cardiac insufficiency	Non-Chronic liver disease	Non-Chronic renal insufficiency
611	male	84	2.0708				survival	17	3.12	100	43.67	35000	100.9	315.3	95.5	175.4	9.6	54.7	7.4	25	20	Validation Cohor	Non-postoperative group	Physical disease	Nonhypertension	Non-Diabetes	Chronic cardiac insufficiency	Chronic liver disease	Non-Chronic renal insufficiency
612	male	47	1.0423				survival	7	7.42	2.807	241	3903.07	29	43	18.3	65.8	3.65	23.8	1.3	7	3	Validation Cohor	Non-postoperative group	Physical disease	Hypertension	Non-Diabetes	Non-Chronic cardiac insufficiency	Chronic liver disease	Non-Chronic renal insufficiency
613	female	68	7843.06	8516.78			survival	6	7.1	0.354	40.4	5672.8	27	115	11.8	57	6.71	28.3	1.3	15	6	Validation Cohor	Non-postoperative group	Physical disease	Nonhypertension	Non-Diabetes	Chronic cardiac insufficiency	Chronic liver disease	Chronic renal insufficiency
614	male	48	0.6858				survival	2	19.57	0.493	236	1138	32.9	35.4	14	51.6	3.37	32	0.8	6	2	Validation Cohor	Non-postoperative group	Physical disease	Nonhypertension	Non-Diabetes	Non-Chronic cardiac insufficiency	Non-Chronic liver disease	Non-Chronic renal insufficiency
615	male	72	2.4297				Death	4	11.28	0.403	80	712.5	8.9	31.2	9	221.7	29.59	69.3	2	15	8	Validation Cohor	Non-postoperative group	Physical disease	Nonhypertension	Non-Diabetes	Non-Chronic cardiac insufficiency	Non-Chronic liver disease	Non-Chronic renal insufficiency
616	female	70	8516				survival	4	7.65	0.0285	0.5	185.2	22.6	21.7	5.6	57.1	5.66	31.4	1.3	7	2	Validation Cohor	Non-postoperative group	Physical disease	Nonhypertension	Non-Diabetes	Non-Chronic cardiac insufficiency	Non-Chronic liver disease	Non-Chronic renal insufficiency
617	male	69	8516				survival	4	10.5	1.8905	43.67	893.8	7.4	14	4.8	113.9	15.01	27.3	1.3	15	6	Validation Cohor	Non-postoperative group	Physical disease	Hypertension	Non-Diabetes	Non-Chronic cardiac insufficiency	Non-Chronic liver disease	Non-Chronic renal insufficiency
618	female	60	3.2515	2.6963			survival	5	7.06	0.7	43.67	35000	1727.6	418.1	19.7	310.5	30.7	24.4	1.3	10	6	Validation Cohor	Non-postoperative group	Physical disease	Nonhypertension	Non-Diabetes	Chronic cardiac insufficiency	Chronic liver disease	Chronic renal insufficiency
619	male	96	9544.18	43994			Death	6	8.09	4.49	80	4315	19	41.3	5.6	187.9	27.99	32.6	1.7	22	10	Validation Cohor	Non-postoperative group	Physical disease	Hypertension	Diabetes	Chronic cardiac insufficiency	Non-Chronic liver disease	Chronic renal insufficiency
620	male	72	25000				Death	4	6.68	100	80	1523	16.4	79.4	69.4	45.4	3.8	27.8	1.1	21	6	Validation Cohor	Non-postoperative group	Malignant tumor	Nonhypertension	Non-Diabetes	Chronic cardiac insufficiency	Chronic liver disease	Non-Chronic renal insufficiency
621	male	72	25000				survival	41	8.79	0.693	43.67	3903.07	16.8	23.8	11	60.2	5.16	28.6	1.3	15	4	Validation Cohor	Non-postoperative group	Severe injury	Nonhypertension	Non-Diabetes	Non-Chronic cardiac insufficiency	Non-Chronic liver disease	Non-Chronic renal insufficiency
622	male	88	25000	25000			survival	8	12.32	0.101	43.67	464.3	11.4	20.8	17.8	102.8	13.9	22.6	1.3	15	4	Validation Cohor	Non-postoperative group	Severe injury	Nonhypertension	Non-Diabetes	Non-Chronic cardiac insufficiency	Non-Chronic liver disease	Non-Chronic renal insufficiency
623	female	55	25000	25000			Death	3	6.49	0.7969	32.5	3221.6	20.8	30.7	29.62	43.3	2.28	77.9	2.3	29	11	Validation Cohor	Non-postoperative group	Malignant tumor	Nonhypertension	Non-Diabetes	Chronic cardiac insufficiency	Non-Chronic liver disease	Non-Chronic renal insufficiency
624	male	54	8516				Death	15	11.39	3.3253	90	3903.07	22.7	23.6	29.62	47.3	17.3	24.9	2	13	4	Validation Cohor	Non-postoperative group	Severe injury	Nonhypertension	Non-Diabetes	Non-Chronic cardiac insufficiency	Non-Chronic liver disease	Non-Chronic renal insufficiency
625	female	59	8516				survival	12	9.6	0.0506	43.67	276.6	13.9	23.6	8.6	60	7.96	22.7	1.3	14	6	Validation Cohor	Non-postoperative group	Severe injury	Hypertension	Non-Diabetes	Non-Chronic cardiac insufficiency	Non-Chronic liver disease	Non-Chronic renal insufficiency
626	male	65	12158.8				Death	5	10.54	100	80	3230	25.6	64.8	17.5	196	17.46	34.9	0.9	24	13	Validation Cohor	Non-postoperative group	Physical disease	Nonhypertension	Non-Diabetes	Non-Chronic cardiac insufficiency	Non-Chronic liver disease	Non-Chronic renal insufficiency
627	male	56	7873.81	3043.16			Death	5	11.48	0.058	19.3	3903.07	13	10.1	26.5	48.9	4.45	29.6	2.02	28	11	Validation Cohor	Non-postoperative group	Severe injury	Nonhypertension	Diabetes	Non-Chronic cardiac insufficiency	Non-Chronic liver disease	Non-Chronic renal insufficiency
628	male	47	2364.96	2274.41			survival	5	14.97	0.185	43.67	73.67	14.1	22	24.2	42.5	6	36	2.9	16	11	Validation Cohor	Non-postoperative group	Severe injury	Nonhypertension	Non-Diabetes	Non-Chronic cardiac insufficiency	Chronic liver disease	Non-Chronic renal insufficiency
629	male	73	5118.38				survival	3	5.86	0.525	43.67	166.4	20	23.1	9.9	51.4	4.36	32.3	0.7	11	3	Validation Cohor	Non-postoperative group	Physical disease	Nonhypertension	Non-Diabetes	Non-Chronic cardiac insufficiency	Non-Chronic liver disease	Non-Chronic renal insufficiency
630	male	87	15237.4	9577.74			Death	4	15.27	6.65	80	915.4	25.8	31.6	15	78.4	38.64	47.6	1.1	30	6	Validation Cohor	Non-postoperative group	Physical disease	Nonhypertension	Non-Diabetes	Chronic cardiac insufficiency	Non-Chronic liver disease	Chronic renal insufficiency
631	male	59	25000				Death	21	10.88	0.214	80	2302	37.7	42.7	9.8	117.9	14.46	24.5	1.4	20	4	Validation Cohor	Non-postoperative group	Severe injury	Nonhypertension	Non-Diabetes	Non-Chronic cardiac insufficiency	Non-Chronic liver disease	Chronic renal insufficiency
632	male	56	25000				survival	1	7.83	0.751	43.67	12145	13.1	16.8	12.4	379.2	20.01	35.9	1.3	10	5	Validation Cohor	Non-postoperative group	Severe injury	Nonhypertension	Non-Diabetes	Non-Chronic cardiac insufficiency	Non-Chronic liver disease	Chronic renal insufficiency
633	male	58	25000				Death	3	14.01	3.66	80	9553	8.5	18.6	7.1	577.6	31.84	33.7	2	21	12	Validation Cohor	Non-postoperative group	Physical disease	Hypertension	Diabetes	Non-Chronic cardiac insufficiency	Non-Chronic liver disease	Chronic renal insufficiency
634	female	78	7543.94	9119.35			survival	7	9	0.0317	21.1	2231	61.5	82.6	9.2	148.9	18.22	32	1.3	10	3	Validation Cohor	Non-postoperative group	Physical disease	Nonhypertension	Non-Diabetes	Chronic cardiac insufficiency	Chronic liver disease	Chronic renal insufficiency
635	male	70	4546.78	6080.52			survival	20	3.56	64.67	137	262.7	9.1	27.6	18.3	72.1	7.38	27.9	1.8	26	10	Validation Cohor	Non-postoperative group	Malignant tumor	Nonhypertension	Non-Diabetes	Non-Chronic cardiac insufficiency	Non-Chronic liver disease	Non-Chronic renal insufficiency
636	male	46	9690.45				survival	25	6.37	19.34	43.67	35000	9.9	23.8	18.4	531	32.53	47.1	1.3	17	10	Validation Cohor	Non-postoperative group	Physical disease	Nonhypertension	Non-Diabetes	Non-Chronic cardiac insufficiency	Chronic liver disease	Chronic renal insufficiency
637	male	40	8516				survival		12.73	19.34	43.67	3903.07	64.92	117.69	29.62	154.1	12.56	38.7	1.3	18	7	Validation Cohor	Non-postoperative group	Physical disease	Nonhypertension	Non-Diabetes	Non-Chronic cardiac insufficiency	Non-Chronic liver disease	Non-Chronic renal insufficiency
638	male	53	8053.02				survival	3	9.37	0.748	43.67	197.1	24.9	34.8	21.4	89.2	6.37	25.2	1.2	9	4	Validation Cohor	Non-postoperative group	Physical disease	Hypertension	Non-Diabetes	Non-Chronic cardiac insufficiency	Non-Chronic liver disease	Non-Chronic renal insufficiency
639	male	46	11077	6298.64			Death	6	4.49	100	80	609	22	46.9	34.1	73.6	10.48	61.3	2.9	15	11	Validation Cohor	Non-postoperative group	Malignant tumor	Nonhypertension	Non-Diabetes	Non-Chronic cardiac insufficiency	Non-Chronic liver disease	Non-Chronic renal insufficiency
640	female	66	5542.7				survival	3	6.04	0.096	43.67	1130	12.6	38.1	12.4	42.8	2.76	31.9	1.3	4	1	Validation Cohor	Non-postoperative group	Physical disease	Nonhypertension	Non-Diabetes	Non-Chronic cardiac insufficiency	Non-Chronic liver disease	Non-Chronic renal insufficiency
641	male	45	1770.44	1325.64			survival	2	13.33	0.358	43.67	3903.07	30.4	37	30	54.1	3	27.1	1.3	8	3	Validation Cohor	Non-postoperative group	Physical disease	Hypertension	Diabetes	Non-Chronic cardiac insufficiency	Non-Chronic liver disease	Non-Chronic renal insufficiency
642	male	39	5362.16				survival	27	0.47	1.8963	43.67	17810.8	1	25.1	89.6	545.5	41.8	39.4	1.2	12	9	Validation Cohor	Non-postoperative group	Physical disease	Nonhypertension	Non-Diabetes	Non-Chronic cardiac insufficiency	Non-Chronic liver disease	Chronic renal insufficiency
643	male	85	3235.88	6751.84			Death	6	38.24	26.05	123	5047	11.4	33.7	7.4	101.2	17.1	36.7	0.9	24	4	Validation Cohor	Non-postoperative group	Physical disease	Nonhypertension	Non-Diabetes	Chronic cardiac insufficiency	Non-Chronic liver disease	Non-Chronic renal insufficiency
644	male	54	8516	25000			survival	24	13.39	2.04	43.67	3402	919.6	1229.2	66.3	248	28.46	39.7	5.3	17	9	Validation Cohor	Non-postoperative group	Physical disease	Nonhypertension	Diabetes	Non-Chronic cardiac insufficiency	Chronic liver disease	Chronic renal insufficiency
645	female	69	1476.35				survival	1	15.76	0.1	43.67	29.01	19.9	18.8	8.5	50.7	5.32	23.7	0.8	14	4	Validation Cohor	Non-postoperative group	Malignant tumor	Nonhypertension	Non-Diabetes	Non-Chronic cardiac insufficiency	Non-Chronic liver disease	Non-Chronic renal insufficiency
646	male	75	11960.3				survival	41	12.89	0.8281	34	7576	39.9	55.6	13.9	197.1	26.52	41.7	1.8	22	8	Validation Cohor	Non-postoperative group	Physical disease	Nonhypertension	Non-Diabetes	Non-Chronic cardiac insufficiency	Non-Chronic liver disease	Chronic renal insufficiency
647	female	47	2960.13	3543.3			survival	5	24.56	60.1595	122	10712	6.8	12.5	11.8	227.5	26.55	27.9	1.3	11	5	Validation Cohor	Non-postoperative group	Severe injury	Nonhypertension	Diabetes	Chronic cardiac insufficiency	Non-Chronic liver disease	Chronic renal insufficiency
648	male	91	19685.2				Death	2	13.69	4.72	80	6673	34.1	26.6	740.8	1018	71.58	81.1	2	17	11	Validation Cohor	Non-postoperative group	Physical disease	Nonhypertension	Non-Diabetes	Non-Chronic cardiac insufficiency	Non-Chronic liver disease	Chronic renal insufficiency
649	male	83	6051.79	25000			survival	2	11.6	5.1507	43.67	385.6	14.4	21.6	1.79	142.1	17.65	44.4	1.3	15	10	Validation Cohor	Non-postoperative group	Physical disease	Nonhypertension	Non-Diabetes	Non-Chronic cardiac insufficiency	Non-Chronic liver disease	Non-Chronic renal insufficiency
650	male	63	15614.5				Death	4	11.96	44.75	80	8949	35.1	30.5	480.4	157.9	45.44	40.7	2.3	18	14	Validation Cohor	Non-postoperative group	Malignant tumor	Nonhypertension	Non-Diabetes	Chronic cardiac insufficiency	Non-Chronic liver disease	Non-Chronic renal insufficiency
651	male	85	16269.2				Death	5	21.37	12.77	80	15792	14.6	37.4	22.8	151.6	16.85	43.5	1.3	32	7	Validation Cohor	Non-postoperative group	Physical disease	Nonhypertension	Non-Diabetes	Chronic cardiac insufficiency	Non-Chronic liver disease	Chronic renal insufficiency
652	male	47	2656.44				Death	7	9.98	0.1	35.24	50.82	16	22	10.9	36.7	3.08	28.4	2	21	7	Validation Cohor	Non-postoperative group	Physical disease	Nonhypertension	Non-Diabetes	Non-Chronic cardiac insufficiency	Non-Chronic liver disease	Non-Chronic renal insufficiency
653	female	81	8516				Death	1	7.2	2.552	137.3	1039	27	35	14.7	85	20.17	40.4	2.23	17	5	Validation Cohor	Non-postoperative group	Physical disease	Nonhypertension	Non-Diabetes	Chronic cardiac insufficiency	Non-Chronic liver disease	Non-Chronic renal insufficiency
654	female	51	8516				Death	2	14.42	180.47	297	0.158	22	18	3.8	69	3.47	21.3	2	20	7	Validation Cohor	Non-postoperative group	Physical disease	Hypertension	Diabetes	Non-Chronic cardiac insufficiency	Non-Chronic liver disease	Non-Chronic renal insufficiency
655	female	81	8516				Death	2	18.78	0.47	3.13	43.3	37	27	13	64	4.68	22.5	1.3	11	2	Validation Cohor	Non-postoperative group	Physical disease	Hypertension	Non-Diabetes	Non-Chronic cardiac insufficiency	Non-Chronic liver disease	Non-Chronic renal insufficiency
656	male	73	8516				survival	6	12.13	0.071	10.94	3987.6	15	12	7.9	41	3.75	38.7	1.2	9	6	Validation Cohor	Non-postoperative group	Physical disease	Hypertension	Non-Diabetes	Non-Chronic cardiac insufficiency	Non-Chronic liver disease	Non-Chronic renal insufficiency
657	male	75	8516				survival		6.63	552.76	38.76	3903.07	24	29	20.3	36	4.08	33.3	1.5	16	8	Validation Cohor	Non-postoperative group	Physical disease	Nonhypertension	Non-Diabetes	Non-Chronic cardiac insufficiency	Non-Chronic liver disease	Non-Chronic renal insufficiency
658	male	78	11772.6				Death	20	9.77	0.1	20.67	1047	23.8	98	16.3	99	14.85	27.9	2	15	7	Validation Cohor	Non-postoperative group	Physical disease	Nonhypertension	Non-Diabetes	Chronic cardiac insufficiency	Chronic liver disease	Non-Chronic renal insufficiency
659	male	76	8516				Death	18	15.09	4.399	80	1500	81	143	27.4	208	20.42	38.7	0.5	15	10	Validation Cohor	Non-postoperative group	Physical disease	Nonhypertension	Non-Diabetes	Chronic cardiac insufficiency	Chronic liver disease	Chronic renal insufficiency
660	female	60	8516				Death	4	15.47	2.327	152.04	70.34	28	25	18.2	84	4.43	19.7	2	25	6	Validation Cohor	Non-postoperative group	Physical disease	Hypertension	Non-Diabetes	Non-Chronic cardiac insufficiency	Non-Chronic liver disease	Non-Chronic renal insufficiency
661	male	57	8516				survival		9.01	4.736	43.67	3903.07	13	25	9.5	99	11.12	33.8	2.8	9	4	Validation Cohor	Non-postoperative group	Physical disease	Nonhypertension	Diabetes	Non-Chronic cardiac insufficiency	Non-Chronic liver disease	Non-Chronic renal insufficiency
662	male	39	8516				survival		11.52	0.048	0.5	3903.07	34	22	20.2	61	5.74	38.7	1.2	20	5	Validation Cohor	Non-postoperative group	Physical disease	Nonhypertension	Non-Diabetes	Non-Chronic cardiac insufficiency	Non-Chronic liver disease	Non-Chronic renal insufficiency
663	male	76	8516				survival		15.19	0.096	30.1	306.9	21	20	7.3	292.6	18.63	27.7	3.1	27	4	Validation Cohor	Non-postoperative group	Physical disease	Hypertension	Diabetes	Chronic cardiac insufficiency	Non-Chronic liver disease	Chronic renal insufficiency
664	male	60	8516				Death	3	6.91	19.82	47.91	3903.07	15	25	14.2	181	10.6	33.3	6.4	20	9	Validation Cohor	Non-postoperative group	Physical disease	Nonhypertension	Non-Diabetes	Non-Chronic cardiac insufficiency	Non-Chronic liver disease	Non-Chronic renal insufficiency
665	male	84	8516				survival	6	11.3	3.609	86.75	3903.07	39	78	22.3	157	15.54	32.2	8.2	18	8	Validation Cohor	Non-postoperative group	Physical disease	Nonhypertension	Non-Diabetes	Non-Chronic cardiac insufficiency	Non-Chronic liver disease	Non-Chronic renal insufficiency
666	male	35	8516				survival	2	8.84	2.096	109	873.1	54	103	12.1	175.3	19.32	25	2.1	21	6	Validation Cohor	Non-postoperative group	Physical disease	Nonhypertension	Diabetes	Non-Chronic cardiac insufficiency	Chronic liver disease	Chronic renal insufficiency
667	male	84	8516				Death	20	8.64	71	80	1988.09	475	1305	30.9	119	10.83	38.4	7.9	22	14	Validation Cohor	Non-postoperative group	Physical disease	Hypertension	Non-Diabetes	Chronic cardiac insufficiency	Chronic liver disease	Non-Chronic renal insufficiency
668	male	80	8516				Death	4	3.38	1.065	33.02	3903.07	27	37	28.1	61	5.29	51.9	0.8	21	6	Validation Cohor	Non-postoperative group	Physical disease	Nonhypertension	Non-Diabetes	Chronic cardiac insufficiency	Chronic liver disease	Non-Chronic renal insufficiency
669	male	58	2713.78	4009.16			survival	4	13.56	0.322	45.02	59.7	17	36	11.7	73	6.15	26.4	0.8	19	5	Validation Cohor	Non-postoperative group	Physical disease	Nonhypertension	Non-Diabetes	Non-Chronic cardiac insufficiency	Non-Chronic liver disease	Non-Chronic renal insufficiency
670	male	61	4255.78				survival	2	10.39	0.261	33.41	49.7	364	227	11.4	84	7.79	24.4	1.8	16	5	Validation Cohor	Non-postoperative group	Physical disease	Nonhypertension	Non-Diabetes	Non-Chronic cardiac insufficiency	Non-Chronic liver disease	Non-Chronic renal insufficiency
671	male	46	6745.2				survival	2	4.21	0.622	53.88	24.5	375	387	14.4	81	8.73	29.2	3	22	5	Validation Cohor	Non-postoperative group	Severe injury	Nonhypertension	Non-Diabetes	Non-Chronic cardiac insufficiency	Chronic liver disease	Non-Chronic renal insufficiency
672	male	77	9355.62				survival	2	13.57	4.841	42.27	2466.17	133	76	16.4	84	3.48	32.5	0.8	20	8	Validation Cohor	Non-postoperative group	Physical disease	Nonhypertension	Non-Diabetes	Chronic cardiac insufficiency	Chronic liver disease	Chronic renal insufficiency
673	female	65	1279.76				survival	2	8.64	0.053	14.73	3903.07	31	45	7.5	46	2.44	34.7	0.8	20	3	Validation Cohor	Non-postoperative group	Physical disease	Nonhypertension	Diabetes	Non-Chronic cardiac insufficiency	Non-Chronic liver disease	Non-Chronic renal insufficiency
674	male	82	13528.3	16749.6			Death	7	9.58	0.057	4.7	5000	11	16	3.2	438.5	42.85	27.8	0.7	26	11	Validation Cohor	Non-postoperative group	Physical disease	Nonhypertension	Non-Diabetes	Chronic cardiac insufficiency	Non-Chronic liver disease	Non-Chronic renal insufficiency
675	female	65	8516	21332.1			survival	5	11.24	7.486	38.62	3506.6	69.4	62	23.1	320	24.9	31.4	0.8	21	11	Validation Cohor	Non-postoperative group	Physical disease	Nonhypertension	Non-Diabetes	Chronic cardiac insufficiency	Chronic liver disease	Chronic renal insufficiency
676	female	59	3611	3692.84			survival		14.6	0.022	0.79	94.3	15	30	7.1	67.5	5.2	25.1	3.8	11	6	Validation Cohor	Non-postoperative group	Physical disease	Nonhypertension	Non-Diabetes	Non-Chronic cardiac insufficiency	Non-Chronic liver disease	Non-Chronic renal insufficiency
677	male	66	4428.72				survival	2	7.53	0.038	95.06	3903.07	25	56	37.7	70	2.93	38.7	0.8	20	4	Validation Cohor	Non-postoperative group	Physical disease	Hypertension	Non-Diabetes	Non-Chronic cardiac insufficiency	Non-Chronic liver disease	Non-Chronic renal insufficiency
678	male	78	2464.8	1698.65			Death	20	11.76	0.087	8.18	1021.1	12	18	10	48	11.13	36.5	0.5	22	6	Validation Cohor	Non-postoperative group	Physical disease	Hypertension	Diabetes	Chronic cardiac insufficiency	Non-Chronic liver disease	Non-Chronic renal insufficiency
679	male	75	20583.8				survival	2	15.77	1.029	43.99	73	18	28	16.6	398	28.59	28.4	0.5	10	6	Validation Cohor	Non-postoperative group	Physical disease	Nonhypertension	Non-Diabetes	Chronic cardiac insufficiency	Non-Chronic liver disease	Non-Chronic renal insufficiency
680	female	57	2112.2	2601.42			Death	26	12.41	0.049	20.32	107	26	23	3.8	19	3.79	23.9	0.6	20	4	Validation Cohor	Non-postoperative group	Physical disease	Nonhypertension	Non-Diabetes	Non-Chronic cardiac insufficiency	Non-Chronic liver disease	Non-Chronic renal insufficiency
681	male	51	3637.44	2325.12			Death	6	15	0.053	46.38	3903.07	21	30	32	56	4.6	25.4	0.8	17	5	Validation Cohor	Non-postoperative group	Physical disease	Nonhypertension	Non-Diabetes	Non-Chronic cardiac insufficiency	Non-Chronic liver disease	Non-Chronic renal insufficiency
682	male	79	4547.34	4091.8			Death	16	10.87	3.923	144.87	254.1	69	128	12.7	116	8.66	38.7	0.8	19	6	Validation Cohor	Non-postoperative group	Physical disease	Nonhypertension	Non-Diabetes	Non-Chronic cardiac insufficiency	Non-Chronic liver disease	Non-Chronic renal insufficiency
683	female	60	17706.9	17586.7			Death	4	10.49	100	80	3903.07	421	744	17.1	659	31.92	38.7	1.2	23	14	Validation Cohor	Non-postoperative group	Physical disease	Hypertension	Non-Diabetes	Non-Chronic cardiac insufficiency	Non-Chronic liver disease	Chronic renal insufficiency
684	female	56	3314.18				survival	2	6.4	2.773	10.2	3903.07	28	70	41.3	83	11	26.4	0.8	20	6	Validation Cohor	Non-postoperative group	Severe injury	Nonhypertension	Non-Diabetes	Non-Chronic cardiac insufficiency	Chronic liver disease	Non-Chronic renal insufficiency
685	female	71	2229.02				survival	2	9.38	0.069	72.3	5	31	26	19.1	134.9	4.5	29.6	2.3	23	4	Validation Cohor	Non-postoperative group	Physical disease	Nonhypertension	Non-Diabetes	Non-Chronic cardiac insufficiency	Non-Chronic liver disease	Non-Chronic renal insufficiency
686	male	82	6222.58	6829.2			Death	5	3.49	1.09	27.95	158.4	26	38	10.1	43.4	2.58	29.3	1.5	19	5	Validation Cohor	Non-postoperative group	Physical disease	Nonhypertension	Non-Diabetes	Non-Chronic cardiac insufficiency	Non-Chronic liver disease	Non-Chronic renal insufficiency
687	female	91	6782.48	9264.74			Death	5	14.24	0.69	196.34	25.3	60	69	6.1	161	15.32	38.7	2.2	20	5	Validation Cohor	Non-postoperative group	Physical disease	Nonhypertension	Non-Diabetes	Non-Chronic cardiac insufficiency	Chronic liver disease	Non-Chronic renal insufficiency
688	female	77	2231.34	2948.48			survival	6	15.33	0.071	47.46	2963.1	49	53	7.5	82	7.63	38.7	0.2	20	4	Validation Cohor	Non-postoperative group	Physical disease	Nonhypertension	Non-Diabetes	Non-Chronic cardiac insufficiency	Non-Chronic liver disease	Non-Chronic renal insufficiency
689	male	78	2569.34				Death	3	10.07	0.214	113.21	74.38	13	25	15.2	75	7.07	21.3	0.2	17	5	Validation Cohor	Non-postoperative group	Physical disease	Nonhypertension	Non-Diabetes	Non-Chronic cardiac insufficiency	Non-Chronic liver disease	Non-Chronic renal insufficiency
690	female	75	6170.48	35140.6			Death	6	4.67	0.065	18.52	711.5	73	24	16.3	62	6.29	38.7	1.1	25	8	Validation Cohor	Non-postoperative group	Physical disease	Hypertension	Diabetes	Chronic cardiac insufficiency	Chronic liver disease	Non-Chronic renal insufficiency
691	male	59	11297.9	26919.8			survival	4	24.66	2.401	43.67	345.81	733	374	84.6	113	27.24	36.9	2.2	17	16	Validation Cohor	Non-postoperative group	Physical disease	Nonhypertension	Non-Diabetes	Chronic cardiac insufficiency	Non-Chronic liver disease	Non-Chronic renal insufficiency
692	male	36	8670.66				survival	2	8.73	1.891	27.1	57.46	15	22	9.5	109	12.66	38.5	1.9	10	5	Validation Cohor	Non-postoperative group	Physical disease	Nonhypertension	Non-Diabetes	Non-Chronic cardiac insufficiency	Non-Chronic liver disease	Chronic renal insufficiency
693	female	29	5268.5	1788.79			Death	6	16.87	1.537	80	3903.07	50	65	18.1	56	3.19	33.6	0.8	23	4	Validation Cohor	Non-postoperative group	Physical disease	Nonhypertension	Non-Diabetes	Non-Chronic cardiac insufficiency	Non-Chronic liver disease	Non-Chronic renal insufficiency
694	male	54	1172.34				survival	2	14.8	0.039	43.67	72.2	29	37	18	72	8.22	26	0.5	13	3	Validation Cohor	Non-postoperative group	Physical disease	Nonhypertension	Non-Diabetes	Non-Chronic cardiac insufficiency	Non-Chronic liver disease	Non-Chronic renal insufficiency
695	male	20	1146.86				survival	6	7	0.309	30.12	3903.07	9	14	6.3	30	3.11	38.7	0.5	20	5	Validation Cohor	Non-postoperative group	Physical disease	Nonhypertension	Non-Diabetes	Chronic cardiac insufficiency	Non-Chronic liver disease	Non-Chronic renal insufficiency
696	male	74	2723.78				survival	2	5.48	0.24	66.64	27.9	28	53	10	41	2.94	29.1	0.6	18	4	Validation Cohor	Non-postoperative group	Physical disease	Nonhypertension	Non-Diabetes	Non-Chronic cardiac insufficiency	Non-Chronic liver disease	Non-Chronic renal insufficiency
697	male	55	1624.6				survival	2	13.06	0.023	80.22	3903.07	40	36	19.5	46	4.72	26.7	0.2	18	3	Validation Cohor	Non-postoperative group	Physical disease	Nonhypertension	Non-Diabetes	Non-Chronic cardiac insufficiency	Non-Chronic liver disease	Non-Chronic renal insufficiency
698	male	62	5201.12				Death	2	13.09	7.125	19.16	3903.07	19	17	2.3	424	15.84	26.8	0.8	19	11	Validation Cohor	Non-postoperative group	Physical disease	Nonhypertension	Non-Diabetes	Non-Chronic cardiac insufficiency	Non-Chronic liver disease	Chronic renal insufficiency
699	male	77	10330.4				Death	2	11.37	46.8	3.573	3903.07	1080	814	9.9	128	11.57	26.2	0.9	22	10	Validation Cohor	Non-postoperative group	Physical disease	Hypertension	Non-Diabetes	Chronic cardiac insufficiency	Chronic liver disease	Non-Chronic renal insufficiency
700	male	40	13058	10750.8			survival		16.05	3.108	109.2	8.7	142	575	20.3	346.2	36.12	28.4	1.9	16	6	Validation Cohor	Non-postoperative group	Physical disease	Nonhypertension	Non-Diabetes	Non-Chronic cardiac insufficiency	Non-Chronic liver disease	Chronic renal insufficiency
701	female	78	15007.6				survival	2	6.87	0.67	155.76	110.79	24	31	34.1	88	6.74	29.7	0.9	17	8	Validation Cohor	Non-postoperative group	Physical disease	Nonhypertension	Non-Diabetes	Chronic cardiac insufficiency	Non-Chronic liver disease	Non-Chronic renal insufficiency
702	male	64	5998				survival	2	7.52	0.0422	131.13	36	11	18	9.5	56	3.26	30.7	1	21	3	Validation Cohor	Non-postoperative group	Physical disease	Hypertension	Non-Diabetes	Non-Chronic cardiac insufficiency	Chronic liver disease	Non-Chronic renal insufficiency
703	female	74	1680.34				Death	2	9.37	0.036	2.81	41.7	15	10	5.3	58	8.45	32.2	0.4	13	7	Validation Cohor	Non-postoperative group	Physical disease	Nonhypertension	Non-Diabetes	Chronic cardiac insufficiency	Non-Chronic liver disease	Non-Chronic renal insufficiency
704	female	74	72763.8	22752.8			Death	6	25.01	15.066	49.92	5079.91	3502	2235	17.2	140	11.95	35.8	5.9	20	9	Validation Cohor	Non-postoperative group	Physical disease	Hypertension	Diabetes	Chronic cardiac insufficiency	Chronic liver disease	Chronic renal insufficiency
705	female	66	3944.3	3202.14			Death	5	23.84	2.616	32.9	37.1	9	23	13.3	58.8	6.32	27.8	2.6	22	5	Validation Cohor	Non-postoperative group	Physical disease	Nonhypertension	Non-Diabetes	Non-Chronic cardiac insufficiency	Non-Chronic liver disease	Non-Chronic renal insufficiency
706	male	53	8664.66	6168.08			survival	6	10.01	1.701	163.23	1542.75	20	39	5.4	357	25.8	33.8	0.9	18	11	Validation Cohor	Non-postoperative group	Physical disease	Nonhypertension	Diabetes	Chronic cardiac insufficiency	Non-Chronic liver disease	Chronic renal insufficiency
707	female	60	10870.1	20804.9			Death	6	6.1	0.673	21.78	2069.4	39	54	42.6	91	16.06	30.9	0.7	15	14	Validation Cohor	Non-postoperative group	Physical disease	Nonhypertension	Non-Diabetes	Chronic cardiac insufficiency	Non-Chronic liver disease	Non-Chronic renal insufficiency
708	male	67	3380.38				survival	1	14.26	1.636	10.13	38.8	68	53	5.6	70	6.84	25.8	1.3	11	6	Validation Cohor	Non-postoperative group	Physical disease	Nonhypertension	Non-Diabetes	Chronic cardiac insufficiency	Non-Chronic liver disease	Non-Chronic renal insufficiency
709	male	66	4163.94				Death	2	13.04	0.012	28.09	56.01	8	14	9.7	63	4.97	38.7	0.5	19	8	Validation Cohor	Non-postoperative group	Physical disease	Hypertension	Non-Diabetes	Chronic cardiac insufficiency	Non-Chronic liver disease	Non-Chronic renal insufficiency
710	male	79	5659.84	1650.56			Death	3	8.3	0.1	19	960.22	24	30	18	143.1	17.96	27.1	0.8	12	4	Validation Cohor	Non-postoperative group	Physical disease	Nonhypertension	Non-Diabetes	Chronic cardiac insufficiency	Non-Chronic liver disease	Chronic renal insufficiency
711	male	57	11571	6102.18			survival	6	9.67	0.767	41.17	3903.07	281	91	253.1	53	8.32	32.8	1.1	22	9	Validation Cohor	Non-postoperative group	Severe injury	Nonhypertension	Non-Diabetes	Chronic cardiac insufficiency	Chronic liver disease	Non-Chronic renal insufficiency
712	male	54	4213.82				Death	2	20.52	10.642	80	2000.3	25	33	16.4	99	6.44	38.7	0.8	15	4	Validation Cohor	Non-postoperative group	Physical disease	Hypertension	Non-Diabetes	Non-Chronic cardiac insufficiency	Non-Chronic liver disease	Non-Chronic renal insufficiency
713	male	85	11278.8	8323.5			survival	4	15.74	0.872	189	57.11	143	226	21.5	153	25.23	27.3	3.1	24	8	Validation Cohor	Non-postoperative group	Physical disease	Hypertension	Diabetes	Non-Chronic cardiac insufficiency	Chronic liver disease	Chronic renal insufficiency
714	female	65	3128.5				Death	1	8.8	0.018	6.35	3903.07	34	22	13.5	58	3.94	22.3	0.7	12	4	Validation Cohor	Non-postoperative group	Physical disease	Hypertension	Non-Diabetes	Non-Chronic cardiac insufficiency	Non-Chronic liver disease	Non-Chronic renal insufficiency
715	male	59	12079.7				survival	11	18.46	2.432	136.73	206.28	35	66	36.8	60	12.26	51.9	18	12	8	Validation Cohor	Non-postoperative group	Physical disease	Nonhypertension	Non-Diabetes	Chronic cardiac insufficiency	Non-Chronic liver disease	Non-Chronic renal insufficiency
716	male	72	8516				survival	2	15.75	9.588	64.14	107.95	150	146	54.5	87	9.77	41.1	0.7	16	6	Validation Cohor	Non-postoperative group	Physical disease	Nonhypertension	Non-Diabetes	Non-Chronic cardiac insufficiency	Chronic liver disease	Non-Chronic renal insufficiency
717	male	41	8516				Death	14	31.22	19.34	84.1	669.9	15.9	34.7	17.9	382.2	59.15	38.7	2	23	11	Validation Cohor	Non-postoperative group	Physical disease	Nonhypertension	Non-Diabetes	Non-Chronic cardiac insufficiency	Chronic liver disease	Chronic renal insufficiency
718	male	54	14581.1				survival	1	11.2	19.34	0.5	312	48.1	117.69	42.1	99.9	10.9	28.4	5	6	3	Validation Cohor	Non-postoperative group	Physical disease	Nonhypertension	Non-Diabetes	Non-Chronic cardiac insufficiency	Non-Chronic liver disease	Non-Chronic renal insufficiency
719	male	77	4456.63	7206.89			survival	1	8.92	19.34	0.5	1142	32.2	20.1	34.1	103.2	8.9	38.7	5.2	6	3	Validation Cohor	Non-postoperative group	Physical disease	Hypertension	Non-Diabetes	Chronic cardiac insufficiency	Non-Chronic liver disease	Non-Chronic renal insufficiency
720	male	63	17438.1	16749.1			survival	4	12.5	19.34	12.4	895	36.7	22.4	24.1	58.3	9.3	42.6	3.4	8	3	Validation Cohor	Non-postoperative group	Physical disease	Nonhypertension	Non-Diabetes	Non-Chronic cardiac insufficiency	Non-Chronic liver disease	Non-Chronic renal insufficiency
721	male	79	10182.5	6109.79			survival	3	11.7	0.1	15.6	1385	37.5	23.5	33.5	56.7	8.3	36.8	3.2	6	3	Validation Cohor	Non-postoperative group	Physical disease	Nonhypertension	Non-Diabetes	Chronic cardiac insufficiency	Non-Chronic liver disease	Non-Chronic renal insufficiency
722	female	77	21854.1	16411.9			survival	5	11.3	0.25	2.5	884	36.4	117.69	26.8	36.4	8.9	32.6	4.5	6	3	Validation Cohor	Non-postoperative group	Physical disease	Nonhypertension	Non-Diabetes	Chronic cardiac insufficiency	Non-Chronic liver disease	Non-Chronic renal insufficiency
723	female	48	8211.49				survival	1	8.9	0.03	4.8	4729	36.7	21.8	28.9	56.4	7.5	33.6	4.6	6	3	Validation Cohor	Non-postoperative group	Physical disease	Nonhypertension	Non-Diabetes	Chronic cardiac insufficiency	Non-Chronic liver disease	Non-Chronic renal insufficiency
724	female	70	10486.3				survival	1	8.9	0.03	3.6	1182	31.2	26.4	27.3	57.3	7.5	36.7	5.6	7	3	Validation Cohor	Non-postoperative group	Physical disease	Nonhypertension	Non-Diabetes	Chronic cardiac insufficiency	Non-Chronic liver disease	Non-Chronic renal insufficiency
725	male	59	6931.64	5097.77			survival	5	11.2	0.23	8.9	784	36.7	26.3	23.6	45.8	6.7	38.6	4.3	11	5	Validation Cohor	Non-postoperative group	Physical disease	Nonhypertension	Non-Diabetes	Chronic cardiac insufficiency	Non-Chronic liver disease	Non-Chronic renal insufficiency
726	male	64	22301.7	20381.1			survival		7.71	0.211	43.67	1033	16.8	25.8	9	80.6	7.3	27.2	1.3	18	7	Validation Cohor	Non-postoperative group	Severe injury	Nonhypertension	Non-Diabetes	Non-Chronic cardiac insufficiency	Non-Chronic liver disease	Non-Chronic renal insufficiency
727	female	67	17792.3	21516.6			survival		12.29	3.34	43.67	3611	17.2	26.1	9.7	52	10.83	41.3	1.3	18	7	Validation Cohor	Non-postoperative group	Severe injury	Nonhypertension	Non-Diabetes	Non-Chronic cardiac insufficiency	Non-Chronic liver disease	Non-Chronic renal insufficiency
728	female	34	25000	25000			survival		20.9	0.567	43.67	184.7	17.5	21.8	19.1	79.1	12.08	38.9	1.3	13	7	Validation Cohor	Non-postoperative group	Severe injury	Nonhypertension	Non-Diabetes	Non-Chronic cardiac insufficiency	Non-Chronic liver disease	Non-Chronic renal insufficiency
729	female	69	2461.09				survival	1	11.2	0.05	16.71	689	22	29	4.6	64	5	34.1	0.7	19	0	Validation Cohor	Non-postoperative group	Physical disease	Nonhypertension	Non-Diabetes	Non-Chronic cardiac insufficiency	Non-Chronic liver disease	Non-Chronic renal insufficiency
730	female	12	8516				survival	3	15.9	0.05	10.24	142	22	17	20.9	35	3.34	30.5	0.6	10	1	Validation Cohor	Non-postoperative group	Physical disease	Nonhypertension	Non-Diabetes	Non-Chronic cardiac insufficiency	Non-Chronic liver disease	Non-Chronic renal insufficiency
731	female	67	21078.8	21545.9			Death	3	11.9	43.47	156.43	4290	17	44	48.6	141	21.24	37.5	10.3	22	17	Validation Cohor	Non-postoperative group	Physical disease	Nonhypertension	Non-Diabetes	Non-Chronic cardiac insufficiency	Chronic liver disease	Non-Chronic renal insufficiency
732	male	66	8640.82				survival	1	20.7	19.85	31.5	256	19	23	17.5	88	8.31	42.6	1	16	1	Validation Cohor	Non-postoperative group	Physical disease	Hypertension	Diabetes	Non-Chronic cardiac insufficiency	Non-Chronic liver disease	Non-Chronic renal insufficiency
733	male	50	21545.9				Death	2	0.4	200	80	25000	29	112	31.1	178	16.95	67.6	6.9	34	18	Validation Cohor	Non-postoperative group	Physical disease	Nonhypertension	Non-Diabetes	Chronic cardiac insufficiency	Chronic liver disease	Chronic renal insufficiency
734	male	63	8516	7579.56			survival	5	17.2	0.38	43.67	625	7	13	8.2	67	11.78	31.4	1.5	9	8	Validation Cohor	Non-postoperative group	Physical disease	Hypertension	Diabetes	Non-Chronic cardiac insufficiency	Non-Chronic liver disease	Non-Chronic renal insufficiency
735	female	65	8718.69				survival	2	27.9	0.54	43.67	20068	7	13	17.7	335	24.03	54.6	2.1	18	7	Validation Cohor	Non-postoperative group	Malignant tumor	Hypertension	Diabetes	Chronic cardiac insufficiency	Non-Chronic liver disease	Chronic renal insufficiency
736	male	41	7357.87	6362.03			survival	5	10.9	200	43.67	3850	283	265	29.7	479	26.19	38.4	2	17	12	Validation Cohor	Non-postoperative group	Physical disease	Nonhypertension	Non-Diabetes	Non-Chronic cardiac insufficiency	Chronic liver disease	Chronic renal insufficiency
737	male	47	9403.29				survival	2	28.7	0.16	43.67	3602	10	14	32.8	69	10.19	27.3	1.4	19	9	Validation Cohor	Non-postoperative group	Severe injury	Nonhypertension	Non-Diabetes	Non-Chronic cardiac insufficiency	Non-Chronic liver disease	Non-Chronic renal insufficiency
738	female	67	10507.2				Death	2	2.8	1.56	80	1931	7	21	40.1	70	12.6	45.2	1.7	18	7	Validation Cohor	Non-postoperative group	Physical disease	Hypertension	Diabetes	Non-Chronic cardiac insufficiency	Non-Chronic liver disease	Non-Chronic renal insufficiency
739	male	32	4818.02				survival	2	9	0.05	43.67	23	60	47	16.9	78	6.23	35	1.1	18	7	Validation Cohor	Non-postoperative group	Physical disease	Nonhypertension	Non-Diabetes	Non-Chronic cardiac insufficiency	Chronic liver disease	Non-Chronic renal insufficiency
740	male	75	13779.1	21545.9			survival	4	21.5	1.5	43.67	1119	15	32	41.1	99	7.61	33.5	1.5	13	9	Validation Cohor	Non-postoperative group	Physical disease	Hypertension	Non-Diabetes	Chronic cardiac insufficiency	Non-Chronic liver disease	Chronic renal insufficiency
741	female	37	4461.47	9363.64			Death	11	11.7	1.56	80	8327	24	74	8.5	98	13.39	30.4	4.8	20	11	Validation Cohor	Non-postoperative group	Physical disease	Hypertension	Diabetes	Chronic cardiac insufficiency	Non-Chronic liver disease	Non-Chronic renal insufficiency
742	female	15	1656.97				survival	2	7.5	0.05	43.67	95	7	20	8.1	38	1.79	40.7	0.4	6	1	Validation Cohor	Non-postoperative group	Severe injury	Nonhypertension	Non-Diabetes	Non-Chronic cardiac insufficiency	Non-Chronic liver disease	Non-Chronic renal insufficiency
743	male	21	6437.7				survival	9	11.8	3.99	43.67	25000	22	37	8.9	1287	55.53	39.9	2	20	7	Validation Cohor	Non-postoperative group	Physical disease	Nonhypertension	Non-Diabetes	Chronic cardiac insufficiency	Non-Chronic liver disease	Chronic renal insufficiency
744	male	76	15023.5				survival	4	16.7	0.18	43.67	2093	7	26	33.9	187	14.7	27.6	2.7	23	14	Validation Cohor	Non-postoperative group	Physical disease	Hypertension	Non-Diabetes	Chronic cardiac insufficiency	Chronic liver disease	Chronic renal insufficiency
745	male	49	9979.01	21545.9			survival	9	20.4	3.17	43.67	9541	8	29	13	668	27.49	71.6	1.1	20	11	Validation Cohor	Non-postoperative group	Severe injury	Nonhypertension	Non-Diabetes	Non-Chronic cardiac insufficiency	Non-Chronic liver disease	Chronic renal insufficiency
746	male	76	20507.9				Death	1	12.73	0.05	80	875	17	14	13.9	71	9.3	38.7	1.1	11	11	Validation Cohor	Non-postoperative group	Physical disease	Hypertension	Diabetes	Non-Chronic cardiac insufficiency	Non-Chronic liver disease	Non-Chronic renal insufficiency
747	female	74	10509.2				survival	2	12.73	3.14	43.67	1437	4	6	9.4	1211	38.3	26	1.2	26	7	Validation Cohor	Non-postoperative group	Physical disease	Nonhypertension	Non-Diabetes	Non-Chronic cardiac insufficiency	Non-Chronic liver disease	Non-Chronic renal insufficiency
748	male	86	18729.1				survival	2	13.2	0.05	43.67	1011	9	27	23.3	92	10.82	180	1.1	18	5	Validation Cohor	Non-postoperative group	Physical disease	Nonhypertension	Non-Diabetes	Non-Chronic cardiac insufficiency	Non-Chronic liver disease	Chronic renal insufficiency
749	female	40	2198.59				survival	4	5.9	0.05	43.67	2138	16	13	20.4	31	2.18	27.1	1.6	13	3	Validation Cohor	Non-postoperative group	Physical disease	Nonhypertension	Non-Diabetes	Non-Chronic cardiac insufficiency	Non-Chronic liver disease	Non-Chronic renal insufficiency
750	male	69	5140.01				Death	10	95	30.92	257.96	385	15	29	16.5	74	9.72	49.5	1	12	11	Validation Cohor	Non-postoperative group	Malignant tumor	Nonhypertension	Non-Diabetes	Non-Chronic cardiac insufficiency	Non-Chronic liver disease	Non-Chronic renal insufficiency
751	male	63	5399.86	4719.85			Death	3	5.9	128.4	80	547	21	37	12.3	171	12.01	32	0.9	24	13	Validation Cohor	Non-postoperative group	Physical disease	Nonhypertension	Non-Diabetes	Non-Chronic cardiac insufficiency	Non-Chronic liver disease	Chronic renal insufficiency
752	male	54	3250.75	21545.9			survival	3	12.4	0.1	43.67	47	31	19	11.5	126	8.52	30.3	2.4	15	7	Validation Cohor	Non-postoperative group	Physical disease	Nonhypertension	Non-Diabetes	Non-Chronic cardiac insufficiency	Non-Chronic liver disease	Non-Chronic renal insufficiency
753	female	72	3294.26	12042.9			Death	3	3	0.22	80	4005	7	23	11.2	100	8.28	32.7	2.1	24	11	Validation Cohor	Non-postoperative group	Physical disease	Hypertension	Non-Diabetes	Non-Chronic cardiac insufficiency	Non-Chronic liver disease	Non-Chronic renal insufficiency
754	female	43	2929.23				survival	4	18	0.05	43.67	27	32	41	9.4	48	6.66	25.7	0.6	18	7	Validation Cohor	Non-postoperative group	Physical disease	Nonhypertension	Non-Diabetes	Non-Chronic cardiac insufficiency	Non-Chronic liver disease	Non-Chronic renal insufficiency
755	female	53	4236.8	1986.69			Death	25	47.6	4.75	163.5	1631	35	37	7.3	87	9.79	39.3	3.2	24	11	Validation Cohor	Non-postoperative group	Physical disease	Nonhypertension	Non-Diabetes	Non-Chronic cardiac insufficiency	Non-Chronic liver disease	Non-Chronic renal insufficiency
756	male	52	21545.9				survival	1	22.7	0.58	6.57	310	1352	672	269.5	97	3.33	62.3	5.4	19	8	Validation Cohor	Non-postoperative group	Physical disease	Nonhypertension	Non-Diabetes	Non-Chronic cardiac insufficiency	Chronic liver disease	Non-Chronic renal insufficiency
757	female	48	21545.9				survival	7	8.6	0.34	43.67	1008	7	26	19.9	183	7.26	40.8	1.4	14	5	Validation Cohor	Non-postoperative group	Severe injury	Nonhypertension	Non-Diabetes	Non-Chronic cardiac insufficiency	Non-Chronic liver disease	Non-Chronic renal insufficiency
758	female	73	21545.9				Death	1	5.4	9.36	80	19102	7	41	8.6	174	31.17	38.8	2.2	18	7	Validation Cohor	Non-postoperative group	Physical disease	Hypertension	Diabetes	Chronic cardiac insufficiency	Non-Chronic liver disease	Non-Chronic renal insufficiency
759	male	36	21545.9	21545.9			survival	4	6.8	7.82	54.16	967	65	81	23.1	246	16.67	70.5	2.1	15	7	Validation Cohor	Non-postoperative group	Physical disease	Nonhypertension	Non-Diabetes	Non-Chronic cardiac insufficiency	Non-Chronic liver disease	Non-Chronic renal insufficiency
760	male	28	11575.6				survival	1	10.9	0.11	1.45	486	7	13	12.4	612	21.83	25.7	0.7	23	7	Validation Cohor	Non-postoperative group	Physical disease	Nonhypertension	Non-Diabetes	Non-Chronic cardiac insufficiency	Non-Chronic liver disease	Chronic renal insufficiency
761	female	68	3332.63				survival		13.3	19.34	17.61	3903.07	7	13	11.2	68	7.56	21.7	2.5	18	7	Validation Cohor	Non-postoperative group	Physical disease	Nonhypertension	Non-Diabetes	Non-Chronic cardiac insufficiency	Non-Chronic liver disease	Non-Chronic renal insufficiency
762	male	76	12768.3	10576.9			survival	3	19.7	4.45	43.67	1438	14	14	7.6	224	30.11	37.4	1.5	18	7	Validation Cohor	Non-postoperative group	Physical disease	Hypertension	Diabetes	Non-Chronic cardiac insufficiency	Non-Chronic liver disease	Chronic renal insufficiency
763	male	66	21545.9				survival	1	40.7	26.14	43.67	3410	10	35	18.2	114	15.05	42.9	1.3	22	6	Validation Cohor	Non-postoperative group	Physical disease	Nonhypertension	Non-Diabetes	Non-Chronic cardiac insufficiency	Non-Chronic liver disease	Non-Chronic renal insufficiency
764	male	27	14189.4	8543.77			survival	3	7.6	0.09	43.67	280	7	13	19.5	401	13.44	180	0.6	21	5	Validation Cohor	Non-postoperative group	Physical disease	Nonhypertension	Non-Diabetes	Non-Chronic cardiac insufficiency	Non-Chronic liver disease	Chronic renal insufficiency
765	female	58	5619.24	5492.23			survival	3	10.4	0.31	171.91	160	7	13	19	59	4.22	42.2	1.2	14	3	Validation Cohor	Non-postoperative group	Physical disease	Hypertension	Non-Diabetes	Non-Chronic cardiac insufficiency	Non-Chronic liver disease	Non-Chronic renal insufficiency
766	male	33	8516				survival	3	5.6	0.25	43.67	1557	7	13	14.1	1221	27.32	40.4	1.4	18	7	Validation Cohor	Non-postoperative group	Physical disease	Nonhypertension	Non-Diabetes	Non-Chronic cardiac insufficiency	Non-Chronic liver disease	Chronic renal insufficiency
767	female	56	15950.4				Death	12	4.2	2.87	277.62	445	15	26	16.8	144	7.23	32	0.8	16	9	Validation Cohor	Non-postoperative group	Physical disease	Hypertension	Diabetes	Non-Chronic cardiac insufficiency	Non-Chronic liver disease	Non-Chronic renal insufficiency
768	female	55	4020.26				survival	6	13.7	0.08	43.67	1199	7	13	5.9	44	4.23	29	1.9	23	7	Validation Cohor	Non-postoperative group	Physical disease	Nonhypertension	Non-Diabetes	Non-Chronic cardiac insufficiency	Non-Chronic liver disease	Non-Chronic renal insufficiency
769	female	69	3169.16				survival	3	7.5	0.05	43.67	808	21	16	15.9	61	7.89	31.9	0.7	20	4	Validation Cohor	Non-postoperative group	Physical disease	Hypertension	Non-Diabetes	Non-Chronic cardiac insufficiency	Non-Chronic liver disease	Non-Chronic renal insufficiency
770	female	64	5625.85				survival	1	12.73	19.34	43.67	3903.07	64.92	117.69	29.62	154.1	12.56	38.7	1.6	23	5	Validation Cohor	Non-postoperative group	Physical disease	Hypertension	Non-Diabetes	Non-Chronic cardiac insufficiency	Chronic liver disease	Non-Chronic renal insufficiency
771	male	38	2100.12				survival	1	12.73	19.34	43.67	3903.07	64.92	117.69	29.62	154.1	12.56	38.7	3.2	3	2	Validation Cohor	Non-postoperative group	Physical disease	Nonhypertension	Non-Diabetes	Non-Chronic cardiac insufficiency	Non-Chronic liver disease	Non-Chronic renal insufficiency
772	female	71	19145.4				Death	1	12.73	5.76	80	360	64.92	117.69	29.62	154.1	12.56	38.7	4.73	18	7	Validation Cohor	Non-postoperative group	Physical disease	Hypertension	Non-Diabetes	Non-Chronic cardiac insufficiency	Non-Chronic liver disease	Chronic renal insufficiency
773	female	30	7693.84	7680.1			survival	8	7.4	0.2	43.67	5314	9	24	15.5	93	5.25	57.4	0.9	23	9	Validation Cohor	Non-postoperative group	Physical disease	Nonhypertension	Non-Diabetes	Non-Chronic cardiac insufficiency	Non-Chronic liver disease	Non-Chronic renal insufficiency
774	female	29	11903.6				survival	1	11.1	14.15	43.67	3006	67	144	6.8	303	9.03	148.1	3	20	10	Validation Cohor	Non-postoperative group	Physical disease	Nonhypertension	Diabetes	Non-Chronic cardiac insufficiency	Non-Chronic liver disease	Chronic renal insufficiency
775	female	84	3917.54	4869.46			survival	5	14.5	0.08	43.67	65	42	43	8.7	75	5.93	180	0.9	21	8	Validation Cohor	Non-postoperative group	Physical disease	Nonhypertension	Non-Diabetes	Non-Chronic cardiac insufficiency	Non-Chronic liver disease	Non-Chronic renal insufficiency
776	male	24	15572.1				survival	3	6.9	3.93	43.67	123	7	13	10.1	100	12.59	28.4	2.2	21	5	Validation Cohor	Non-postoperative group	Physical disease	Nonhypertension	Diabetes	Non-Chronic cardiac insufficiency	Non-Chronic liver disease	Non-Chronic renal insufficiency
777	female	71	20580.2				survival	1	7.8	0.05	43.67	419	72	150	4.9	59	6.68	33.3	14.8	18	7	Validation Cohor	Non-postoperative group	Other	Nonhypertension	Non-Diabetes	Non-Chronic cardiac insufficiency	Non-Chronic liver disease	Non-Chronic renal insufficiency
778	male	53	8012.54	2408.62			survival	6	6.9	0.05	43.67	136	7	13	13.6	59	4.08	55	0.6	21	3	Validation Cohor	Non-postoperative group	Severe injury	Hypertension	Diabetes	Non-Chronic cardiac insufficiency	Non-Chronic liver disease	Non-Chronic renal insufficiency
779	male	84	20401.8	19362.1			survival	18	12.9	4.12	43.67	25000	7	14	14.2	102	18.6	48.2	1.26	24	8	Validation Cohor	Non-postoperative group	Physical disease	Nonhypertension	Non-Diabetes	Non-Chronic cardiac insufficiency	Non-Chronic liver disease	Non-Chronic renal insufficiency
780	female	51	21545.9	21545.9			Death	4	7.1	0.51	80	1079	268	231	122.5	51	5.85	45.4	3.5	19	14	Validation Cohor	Non-postoperative group	Physical disease	Nonhypertension	Non-Diabetes	Chronic cardiac insufficiency	Chronic liver disease	Non-Chronic renal insufficiency
781	female	53	10039.8				survival	6	12.1	0.67	16.83	113	7	13	21.1	267	23.74	24.8	0.8	18	7	Validation Cohor	Non-postoperative group	Physical disease	Nonhypertension	Non-Diabetes	Chronic cardiac insufficiency	Non-Chronic liver disease	Chronic renal insufficiency
782	male	60	1996.28				survival	4	11	0.12	43.67	361	8	15	37.4	65	5.94	32.2	1.2	18	7	Validation Cohor	Non-postoperative group	Physical disease	Nonhypertension	Non-Diabetes	Non-Chronic cardiac insufficiency	Non-Chronic liver disease	Non-Chronic renal insufficiency
783	male	68	21545.9				Death	1	4.5	1.42	80	17519	110	381	65.9	438	34.13	41	2.4	18	4	Validation Cohor	Non-postoperative group	Severe injury	Nonhypertension	Non-Diabetes	Chronic cardiac insufficiency	Non-Chronic liver disease	Chronic renal insufficiency
784	female	51	8516				survival	2	5.6	0.24	43.67	3575	8	28	23.9	55	11.36	31.6	0.9	18	7	Validation Cohor	Non-postoperative group	Physical disease	Nonhypertension	Diabetes	Non-Chronic cardiac insufficiency	Non-Chronic liver disease	Non-Chronic renal insufficiency
785	female	82	21545.9	17936.4			survival	15	23.7	20.06	43.67	4276	10	26	17.2	92	6.54	36.6	2.1	18	0	Validation Cohor	Non-postoperative group	Physical disease	Hypertension	Diabetes	Chronic cardiac insufficiency	Non-Chronic liver disease	Chronic renal insufficiency
786	male	68	6737.89				survival	2	3.3	0.79	239.2	575	16	21	14.4	69	8.65	35.6	1.6	18	7	Validation Cohor	Non-postoperative group	Physical disease	Nonhypertension	Non-Diabetes	Non-Chronic cardiac insufficiency	Non-Chronic liver disease	Non-Chronic renal insufficiency
787	female	71	3966.98				survival	3	4.9	0.11	9.34	5446	7	18	16.2	217	11.58	59.8	1.4	18	7	Validation Cohor	Non-postoperative group	Physical disease	Hypertension	Non-Diabetes	Chronic cardiac insufficiency	Non-Chronic liver disease	Chronic renal insufficiency
788	female	90	21545.9				Death	1	18.3	0.59	72.92	1583	35	92	45	120	20.35	52	4	18	7	Validation Cohor	Non-postoperative group	Physical disease	Nonhypertension	Non-Diabetes	Non-Chronic cardiac insufficiency	Chronic liver disease	Non-Chronic renal insufficiency
789	male	67	8394.91	21170.5			survival	5	23.3	19.22	358.54	208	38	16	10.5	49	7.76	34.6	3.6	18	7	Validation Cohor	Non-postoperative group	Physical disease	Nonhypertension	Non-Diabetes	Non-Chronic cardiac insufficiency	Non-Chronic liver disease	Non-Chronic renal insufficiency
790	male	37	14426.2				survival	3	6.7	0.09	31.39	286	7	13	15.7	130	5.66	31.2	1	18	7	Validation Cohor	Non-postoperative group	Severe injury	Nonhypertension	Diabetes	Non-Chronic cardiac insufficiency	Non-Chronic liver disease	Non-Chronic renal insufficiency
791	female	57	14523				survival	1	11	0.05	4.06	804	25	39	17.1	92	6.75	25.2	1	18	7	Validation Cohor	Non-postoperative group	Malignant tumor	Nonhypertension	Non-Diabetes	Non-Chronic cardiac insufficiency	Non-Chronic liver disease	Non-Chronic renal insufficiency
792	female	64	1026.11	21545.9			survival	6	1.2	1.35	31.43	25000	13	34	32.6	132	21.38	43	8.7	21	7	Validation Cohor	Non-postoperative group	Severe injury	Nonhypertension	Non-Diabetes	Non-Chronic cardiac insufficiency	Non-Chronic liver disease	Non-Chronic renal insufficiency
793	female	71	7220.66				survival	1	15.2	47.72	129.67	1464	24	42	9.3	102	10.75	30.6	5.1	11	3	Validation Cohor	Non-postoperative group	Physical disease	Hypertension	Non-Diabetes	Non-Chronic cardiac insufficiency	Non-Chronic liver disease	Non-Chronic renal insufficiency
794	female	66	21545.9				survival	1	1.2	161.77	78.08	8521	7	23	8.1	188	17.1	37.5	4.3	21	6	Validation Cohor	Non-postoperative group	Physical disease	Nonhypertension	Non-Diabetes	Non-Chronic cardiac insufficiency	Non-Chronic liver disease	Chronic renal insufficiency
795	male	75	9550.18				survival	3	8.3	0.07	64.1	2789	7	19	14.7	314	14.27	93.4	1	18	7	Validation Cohor	Non-postoperative group	Physical disease	Nonhypertension	Non-Diabetes	Non-Chronic cardiac insufficiency	Non-Chronic liver disease	Chronic renal insufficiency
796	male	72	7157.51	11871.8			survival	3	16.9	0.05	142.29	163	7	17	15.3	66	3.62	35.6	1.7	9	5	Validation Cohor	Non-postoperative group	Physical disease	Hypertension	Non-Diabetes	Non-Chronic cardiac insufficiency	Non-Chronic liver disease	Non-Chronic renal insufficiency
797	male	55	21545.9				survival	4	18.1	3.79	330.47	300	164	108	24.3	106	17.7	37.7	1.3	10	8	Validation Cohor	Non-postoperative group	Physical disease	Hypertension	Diabetes	Chronic cardiac insufficiency	Chronic liver disease	Chronic renal insufficiency
798	female	50	10436.7				survival	2	11.9	0.05	1	434	17	56	35.1	61	12.56	27.2	4	18	7	Validation Cohor	Non-postoperative group	Physical disease	Nonhypertension	Non-Diabetes	Chronic cardiac insufficiency	Non-Chronic liver disease	Non-Chronic renal insufficiency
799	female	66	21545.9	21545.9			Death	8	12.7	1.28	3.7	831	20	79	54.7	100	13.58	31.1	2.9	17	15	Validation Cohor	Non-postoperative group	Physical disease	Nonhypertension	Non-Diabetes	Chronic cardiac insufficiency	Non-Chronic liver disease	Chronic renal insufficiency
800	male	59	21545.9				Death	1	6.5	0.15	1.22	3257	7	18	8.9	759	17.51	28.5	3.1	18	7	Validation Cohor	Non-postoperative group	Severe injury	Hypertension	Diabetes	Non-Chronic cardiac insufficiency	Non-Chronic liver disease	Non-Chronic renal insufficiency
801	female	65	6475.52	5474.45			survival	11	13.3	0.52	43.67	418	12	22	10.9	41	7.86	41.8	0.4	23	10	Validation Cohor	Non-postoperative group	Physical disease	Nonhypertension	Non-Diabetes	Chronic cardiac insufficiency	Non-Chronic liver disease	Non-Chronic renal insufficiency
802	male	35	6072.13				survival	1	8.8	0.05	43.67	15	64.92	117.69	29.62	103	4.27	33.9	3.3	18	7	Validation Cohor	Non-postoperative group	Physical disease	Nonhypertension	Non-Diabetes	Non-Chronic cardiac insufficiency	Non-Chronic liver disease	Non-Chronic renal insufficiency
803	male	51	4916.71				survival	1	8.8	0.05	43.67	15	15	23	17.9	112	6.68	43.9	1	18	7	Validation Cohor	Non-postoperative group	Physical disease	Nonhypertension	Non-Diabetes	Non-Chronic cardiac insufficiency	Non-Chronic liver disease	Non-Chronic renal insufficiency
804	male	60	7753.7				survival	3	14.2	0.14	1.53	504	9	19	11.8	60	6.54	28.4	0.9	18	8	Validation Cohor	Non-postoperative group	Severe injury	Nonhypertension	Non-Diabetes	Non-Chronic cardiac insufficiency	Non-Chronic liver disease	Non-Chronic renal insufficiency
805	male	50	20125.8				survival	3	6	0.44	22.07	96	91	222	467.4	320	24.04	39.5	2.7	18	7	Validation Cohor	Non-postoperative group	Physical disease	Nonhypertension	Non-Diabetes	Non-Chronic cardiac insufficiency	Chronic liver disease	Chronic renal insufficiency
806	male	61	20075.1				survival	8	15.7	2.13	121.23	14576	76	132	11.5	59	6.49	35.3	2.2	17	7	Validation Cohor	Non-postoperative group	Malignant tumor	Nonhypertension	Non-Diabetes	Chronic cardiac insufficiency	Non-Chronic liver disease	Chronic renal insufficiency
807	male	28	11360.3				Death	3	4.2	11.68	110.99	25000	7	18	10.4	154	8.45	42.2	2	18	7	Validation Cohor	Non-postoperative group	Physical disease	Hypertension	Non-Diabetes	Non-Chronic cardiac insufficiency	Non-Chronic liver disease	Chronic renal insufficiency
808	male	49	14012				Death	2	43.7	6.82	226.6	2642	7	18	23.1	93	9.87	35.3	6.7	18	7	Validation Cohor	Non-postoperative group	Physical disease	Nonhypertension	Non-Diabetes	Non-Chronic cardiac insufficiency	Non-Chronic liver disease	Non-Chronic renal insufficiency
809	male	89	19336.1				Death	3	13.5	0.89	86.21	3176	7	13	10.8	360	30.43	28.3	1.2	34	8	Validation Cohor	Non-postoperative group	Physical disease	Nonhypertension	Non-Diabetes	Chronic cardiac insufficiency	Non-Chronic liver disease	Chronic renal insufficiency
810	male	51	18027.5				survival	12	15	75.07	75.07	5	7	15	79.6	117	9.89	68.9	6.2	18	7	Validation Cohor	Non-postoperative group	Physical disease	Nonhypertension	Non-Diabetes	Non-Chronic cardiac insufficiency	Chronic liver disease	Non-Chronic renal insufficiency
811	female	68	21545.9				survival	12	4.8	0.05	43.67	5369	24	28	17.3	58	5.89	36.7	10.4	16	4	Validation Cohor	Non-postoperative group	Malignant tumor	Nonhypertension	Non-Diabetes	Chronic cardiac insufficiency	Chronic liver disease	Non-Chronic renal insufficiency
812	female	55	8516				survival	6	6.2	0.29	33.67	1238	7	14	14.5	61	5.42	32	0.7	23	7	Validation Cohor	Non-postoperative group	Malignant tumor	Nonhypertension	Non-Diabetes	Non-Chronic cardiac insufficiency	Non-Chronic liver disease	Non-Chronic renal insufficiency
813	male	51	6212.54				survival	7	15	0.05	48.79	2910	114	22	12	115	7.21	37.4	2.4	21	7	Validation Cohor	Non-postoperative group	Physical disease	Hypertension	Diabetes	Chronic cardiac insufficiency	Non-Chronic liver disease	Chronic renal insufficiency
814	male	70	11375.5				Death	2	10.5	2.71	95.24	2521	7	20	20.2	87	6.6	40.1	2	18	7	Validation Cohor	Non-postoperative group	Physical disease	Hypertension	Non-Diabetes	Non-Chronic cardiac insufficiency	Non-Chronic liver disease	Non-Chronic renal insufficiency
815	male	53	2870.62				survival	2	6.8	0.05	15.81	45	21	13	17.8	61	4.41	36	1.1	18	7	Validation Cohor	Non-postoperative group	Malignant tumor	Nonhypertension	Non-Diabetes	Non-Chronic cardiac insufficiency	Non-Chronic liver disease	Non-Chronic renal insufficiency
816	male	57	15752.3				survival	2	15.9	6.73	43.67	1248	58	44	30	81	9.34	31.2	0.9	18	7	Validation Cohor	Non-postoperative group	Physical disease	Nonhypertension	Diabetes	Non-Chronic cardiac insufficiency	Non-Chronic liver disease	Non-Chronic renal insufficiency
817	male	75	14056.5				Death	2	16.5	0.05	1.03	1055	20	35	6.6	62	9.05	39.7	1.2	18	7	Validation Cohor	Non-postoperative group	Physical disease	Hypertension	Non-Diabetes	Chronic cardiac insufficiency	Non-Chronic liver disease	Non-Chronic renal insufficiency
818	male	21	14018.9	7707.63			survival	13	13.9	2.41	66.84	25000	22	62	17.8	657	26.91	44.8	1.5	20	7	Validation Cohor	Non-postoperative group	Physical disease	Nonhypertension	Non-Diabetes	Chronic cardiac insufficiency	Non-Chronic liver disease	Chronic renal insufficiency
819	female	70	7553.16	18711.6			Death	14	11.7	26.59	126.87	25000	7	15	37.3	335	18.24	34.6	2.1	20	8	Validation Cohor	Non-postoperative group	Severe injury	Nonhypertension	Non-Diabetes	Chronic cardiac insufficiency	Non-Chronic liver disease	Chronic renal insufficiency
820	female	82	5892.76	21545.9			survival	4	3.2	0.05	2.03	2721	11	45	9.2	71	5.37	34.7	1.4	24	3	Validation Cohor	Non-postoperative group	Physical disease	Nonhypertension	Non-Diabetes	Chronic cardiac insufficiency	Non-Chronic liver disease	Chronic renal insufficiency
821	male	41	5080.24				survival	5	16.9	0.05	246.24	199	23	135	20.5	53	6.44	28.6	0.9	9	1	Validation Cohor	Non-postoperative group	Physical disease	Nonhypertension	Non-Diabetes	Non-Chronic cardiac insufficiency	Non-Chronic liver disease	Non-Chronic renal insufficiency
822	male	80	15420.4	17774			survival	6	16.3	1.06	43.67	3291	7	13	25.9	117	5.21	32	1.2	22	9	Validation Cohor	Non-postoperative group	Physical disease	Nonhypertension	Non-Diabetes	Chronic cardiac insufficiency	Non-Chronic liver disease	Non-Chronic renal insufficiency
823	male	73	5822.87	21545.9			survival	5	12.3	0.05	4.26	695	14	35	19.1	93	3.17	30	4.9	16	4	Validation Cohor	Non-postoperative group	Physical disease	Nonhypertension	Non-Diabetes	Non-Chronic cardiac insufficiency	Non-Chronic liver disease	Non-Chronic renal insufficiency
824	male	87	18537.5				Death	7	15.8	0.95	99.53	5325	8	20	7.7	55	4.35	32	1.8	18	7	Validation Cohor	Non-postoperative group	Physical disease	Nonhypertension	Non-Diabetes	Non-Chronic cardiac insufficiency	Non-Chronic liver disease	Non-Chronic renal insufficiency
825	female	68	12175.4				survival	3	23.9	1.36	135.95	360	7	13	7	55	11.87	30.3	0.9	25	0	Validation Cohor	Non-postoperative group	Physical disease	Nonhypertension	Non-Diabetes	Non-Chronic cardiac insufficiency	Non-Chronic liver disease	Non-Chronic renal insufficiency
826	female	78	17462.9				Death	7	4.6	19.34	80	3903.07	7	18	5.2	188	10.44	32.3	0.9	28	13	Validation Cohor	Non-postoperative group	Physical disease	Hypertension	Diabetes	Non-Chronic cardiac insufficiency	Non-Chronic liver disease	Chronic renal insufficiency
827	female	88	2919.25				survival	7	10.1	0.05	11.89	1911	36	40	3.9	67	7.9	35.6	0.5	13	4	Validation Cohor	Non-postoperative group	Physical disease	Hypertension	Non-Diabetes	Non-Chronic cardiac insufficiency	Non-Chronic liver disease	Non-Chronic renal insufficiency
828	male	49	4607.69	3315.4			survival	6	0.4	0.46	77.82	38	124	48	15.3	58	4.99	39.6	1	20	1	Validation Cohor	Non-postoperative group	Severe injury	Nonhypertension	Non-Diabetes	Non-Chronic cardiac insufficiency	Non-Chronic liver disease	Non-Chronic renal insufficiency
829	female	43	16448.9				survival	3	15.1	4.98	43.67	613	16	34	5.5	450	20.47	29.2	1.1	24	7	Validation Cohor	Non-postoperative group	Physical disease	Nonhypertension	Non-Diabetes	Non-Chronic cardiac insufficiency	Non-Chronic liver disease	Chronic renal insufficiency
830	female	21	3121.04				survival	3	13.3	12.07	284.52	51	51	57	22.8	73	4	33.9	2.1	18	7	Validation Cohor	Non-postoperative group	Physical disease	Nonhypertension	Non-Diabetes	Non-Chronic cardiac insufficiency	Non-Chronic liver disease	Non-Chronic renal insufficiency
831	male	75	12026.3				Death	3	15.2	1.51	182.54	25000	7	22	11.6	1246	42.29	40.9	1.7	24	13	Validation Cohor	Non-postoperative group	Physical disease	Hypertension	Non-Diabetes	Chronic cardiac insufficiency	Non-Chronic liver disease	Chronic renal insufficiency
832	female	70	11282.8				Death	2	30	35.67	290.73	20379	7	15	7.8	266	16.67	36.3	1.1	18	7	Validation Cohor	Non-postoperative group	Physical disease	Nonhypertension	Non-Diabetes	Non-Chronic cardiac insufficiency	Non-Chronic liver disease	Non-Chronic renal insufficiency
833	female	45	3130.84				survival	2	26.6	0.07	43.67	181	10	13	7	43	4.9	28.9	1.2	26	8	Validation Cohor	Non-postoperative group	Malignant tumor	Nonhypertension	Non-Diabetes	Non-Chronic cardiac insufficiency	Non-Chronic liver disease	Non-Chronic renal insufficiency
834	male	67	10160.9	8830.61			survival	2	18.3	0.06	150.41	344	7	13	18.9	75	4.74	34.6	0.7	15	3	Validation Cohor	Non-postoperative group	Severe injury	Hypertension	Non-Diabetes	Non-Chronic cardiac insufficiency	Non-Chronic liver disease	Non-Chronic renal insufficiency
835	male	47	16448.9	13420.1			Death	4	3.5	42.19	107.15	1286	60	110	60.4	166	11.55	55	8.1	18	7	Validation Cohor	Non-postoperative group	Physical disease	Nonhypertension	Non-Diabetes	Non-Chronic cardiac insufficiency	Chronic liver disease	Chronic renal insufficiency
836	male	57	6348.27				survival	3	12.2	0.05	3.96	105	63	92	25.6	111	4.65	37.6	1.1	18	7	Validation Cohor	Non-postoperative group	Physical disease	Nonhypertension	Non-Diabetes	Non-Chronic cardiac insufficiency	Chronic liver disease	Non-Chronic renal insufficiency
837	female	74	9730.09				survival	4	20.5	1.26	171.24	3312	54	41	25.9	166	9.61	22.4	1.3	18	7	Validation Cohor	Non-postoperative group	Physical disease	Hypertension	Non-Diabetes	Non-Chronic cardiac insufficiency	Non-Chronic liver disease	Non-Chronic renal insufficiency
838	female	75	16448.9				survival	2	23.7	17.78	151.43	25000	7	13	10.3	404	27.98	25	1.1	20	3	Validation Cohor	Non-postoperative group	Physical disease	Hypertension	Diabetes	Non-Chronic cardiac insufficiency	Non-Chronic liver disease	Chronic renal insufficiency
839	male	77	3422.95				survival	4	26.6	0.05	14.28	51	7	14	4.2	116	19.85	26	1.3	18	7	Validation Cohor	Non-postoperative group	Severe injury	Nonhypertension	Non-Diabetes	Non-Chronic cardiac insufficiency	Non-Chronic liver disease	Non-Chronic renal insufficiency
840	female	34	6720.29				survival	7	8.2	1.84	45.19	1037	13	53	6.8	143	13	33.9	0.8	18	7	Validation Cohor	Non-postoperative group	Physical disease	Nonhypertension	Non-Diabetes	Non-Chronic cardiac insufficiency	Non-Chronic liver disease	Non-Chronic renal insufficiency
841	female	49	9064.47				survival	3	22.9	5.64	158	25000	7	13	10.9	914	28.8	180	1.4	18	7	Validation Cohor	Non-postoperative group	Physical disease	Nonhypertension	Non-Diabetes	Non-Chronic cardiac insufficiency	Non-Chronic liver disease	Chronic renal insufficiency
842	male	72	7317.58				survival	5	7.6	0.05	56.9	1548	35	34	14.5	79	6.23	29	0.8	11	4	Validation Cohor	Non-postoperative group	Severe injury	Hypertension	Diabetes	Non-Chronic cardiac insufficiency	Non-Chronic liver disease	Non-Chronic renal insufficiency
843	female	68	5112.53				survival	6	9.1	0.29	22.93	1394	39	39	19.5	34	5.5	37.8	1.4	19	7	Validation Cohor	Non-postoperative group	Physical disease	Hypertension	Non-Diabetes	Non-Chronic cardiac insufficiency	Non-Chronic liver disease	Chronic renal insufficiency
844	male	65	16448.9				Death	4	16.7	0.81	102.65	268	23	48	27.3	350	22.44	26.3	8.3	30	14	Validation Cohor	Non-postoperative group	Physical disease	Nonhypertension	Diabetes	Non-Chronic cardiac insufficiency	Non-Chronic liver disease	Chronic renal insufficiency
845	male	30	4262.74				survival	15	20.9	0.05	78.48	15	196	44	11.2	82	10.75	33.4	1.4	11	7	Validation Cohor	Non-postoperative group	Severe injury	Nonhypertension	Non-Diabetes	Non-Chronic cardiac insufficiency	Non-Chronic liver disease	Non-Chronic renal insufficiency
846	male	33	16448.9				Death	17	26.1	196.9	31.22	3760	7	30	12.5	35	7.34	33.5	1.6	22	9	Validation Cohor	Non-postoperative group	Malignant tumor	Nonhypertension	Non-Diabetes	Non-Chronic cardiac insufficiency	Non-Chronic liver disease	Non-Chronic renal insufficiency
847	female	25	16448.9				survival	7	9.8	0.08	106.44	72	10	23	5.8	38	1.51	32.6	0.5	6	1	Validation Cohor	Non-postoperative group	Physical disease	Nonhypertension	Non-Diabetes	Non-Chronic cardiac insufficiency	Non-Chronic liver disease	Non-Chronic renal insufficiency
848	male	47	16448.9				survival	3	9.6	2.51	118.01	25000	7	22	13.4	253	27.86	32.4	0.5	12	9	Validation Cohor	Non-postoperative group	Physical disease	Hypertension	Diabetes	Non-Chronic cardiac insufficiency	Chronic liver disease	Chronic renal insufficiency
849	male	38	7028.61				survival	5	11.6	170.06	69.93	2383	7	17	4.3	424	15.85	28.6	1.6	5	5	Validation Cohor	Non-postoperative group	Physical disease	Hypertension	Diabetes	Non-Chronic cardiac insufficiency	Non-Chronic liver disease	Chronic renal insufficiency
850	male	18	2629.58				survival	1	11	0.05	9.25	15	7	14	3.1	63	3.81	31.9	5.4	18	7	Validation Cohor	Non-postoperative group	Other	Nonhypertension	Non-Diabetes	Non-Chronic cardiac insufficiency	Non-Chronic liver disease	Non-Chronic renal insufficiency
851	male	22	16448.9				survival	3	4.9	0.11	58.74	202	46	56	18.7	68	2.73	47.2	1.1	18	3	Validation Cohor	Non-postoperative group	Physical disease	Nonhypertension	Non-Diabetes	Non-Chronic cardiac insufficiency	Non-Chronic liver disease	Non-Chronic renal insufficiency
852	male	74	16448.9				Death	3	2.1	19.34	73.98	3903.07	36	27	45.1	144	7.37	41.6	1.8	18	7	Validation Cohor	Non-postoperative group	Physical disease	Nonhypertension	Non-Diabetes	Chronic cardiac insufficiency	Non-Chronic liver disease	Non-Chronic renal insufficiency
853	male	52	3276.15				survival	2	13	0.66	56.19	57	7	20	15.2	117	9.8	34.2	1.1	3	6	Validation Cohor	Non-postoperative group	Physical disease	Nonhypertension	Non-Diabetes	Non-Chronic cardiac insufficiency	Non-Chronic liver disease	Non-Chronic renal insufficiency
854	male	74	1359.22	10875.1			Death	3	7.2	0.05	80	42	7	24	12.3	122	9.57	33.8	1.5	25	11	Validation Cohor	Non-postoperative group	Severe injury	Hypertension	Diabetes	Non-Chronic cardiac insufficiency	Non-Chronic liver disease	Non-Chronic renal insufficiency
855	male	75	5588.46	4439.43			survival	12	12.5	0.8	43.67	1465	7	46	16.6	42	5.3	36.3	1.8	19	4	Validation Cohor	Non-postoperative group	Physical disease	Nonhypertension	Non-Diabetes	Non-Chronic cardiac insufficiency	Non-Chronic liver disease	Non-Chronic renal insufficiency
856	male	68	5422.63	3158.71			survival	11	6.7	0.041	119.7	1650	11	43	10.7	51	4.45	41.7	1.2	18	7	Validation Cohor	Non-postoperative group	Physical disease	Hypertension	Non-Diabetes	Non-Chronic cardiac insufficiency	Non-Chronic liver disease	Non-Chronic renal insufficiency
857	male	65	5681.24				survival	2	11.7	0.31	84.3	457	11	14	7.1	98	4.04	53.2	0.9	18	7	Validation Cohor	Non-postoperative group	Malignant tumor	Nonhypertension	Non-Diabetes	Non-Chronic cardiac insufficiency	Non-Chronic liver disease	Non-Chronic renal insufficiency
858	female	75	15363.1	14669.1			Death	6	11.8	0.75	16.53	848	7	49	12.7	123	14.35	36	1.6	18	7	Validation Cohor	Non-postoperative group	Physical disease	Nonhypertension	Non-Diabetes	Non-Chronic cardiac insufficiency	Non-Chronic liver disease	Non-Chronic renal insufficiency
859	male	50	4293.57	3163.04			Death	12	11.4	3.88	339.02	594	8	23	11.3	223	4.87	43.9	1.9	20	11	Validation Cohor	Non-postoperative group	Physical disease	Nonhypertension	Non-Diabetes	Non-Chronic cardiac insufficiency	Non-Chronic liver disease	Non-Chronic renal insufficiency
860	male	98	15340.9				survival	2	83.2	27.07	103.54	22323	7	52	7.5	186	17.23	32.9	1.4	20	9	Validation Cohor	Non-postoperative group	Physical disease	Nonhypertension	Non-Diabetes	Non-Chronic cardiac insufficiency	Non-Chronic liver disease	Non-Chronic renal insufficiency
861	female	73	3034.03				survival	3	22.7	4.01	1.97	440	22	72	4.7	63	5.51	26.3	2.8	18	9	Validation Cohor	Non-postoperative group	Severe injury	Nonhypertension	Non-Diabetes	Non-Chronic cardiac insufficiency	Non-Chronic liver disease	Non-Chronic renal insufficiency
862	female	24	13331.4				Death	3	18.7	8.76	242.54	369	79	298	30.3	210	8.41	34.3	2.1	18	7	Validation Cohor	Non-postoperative group	Physical disease	Nonhypertension	Non-Diabetes	Non-Chronic cardiac insufficiency	Chronic liver disease	Chronic renal insufficiency
863	male	57	4586.47	2877.25			Death	1	2.1	7.14	76.59	1666	63	335	569.7	391	15.86	178.4	12.5	18	7	Validation Cohor	Non-postoperative group	Physical disease	Nonhypertension	Non-Diabetes	Non-Chronic cardiac insufficiency	Non-Chronic liver disease	Chronic renal insufficiency
864	female	63	3731.57				Death	8	12.9	139.17	125.84	647	44	25	18.4	477	23.79	45.4	1.5	18	7	Validation Cohor	Non-postoperative group	Physical disease	Hypertension	Diabetes	Chronic cardiac insufficiency	Chronic liver disease	Chronic renal insufficiency
865	male	49	1656.52	1854.92			survival	6	10.5	0.05	4.95	44	8	13	12.3	75	3.81	37.9	0.9	18	7	Validation Cohor	Non-postoperative group	Physical disease	Hypertension	Diabetes	Non-Chronic cardiac insufficiency	Non-Chronic liver disease	Non-Chronic renal insufficiency
866	male	58	16448.9	16448.9			survival	7	18.1	0.35	45.41	413	827	1131	30.5	320	29.29	45.1	1.6	18	7	Validation Cohor	Non-postoperative group	Physical disease	Nonhypertension	Non-Diabetes	Non-Chronic cardiac insufficiency	Chronic liver disease	Non-Chronic renal insufficiency
867	male	56	5131.1				survival	2	21.6	2.14	229.57	5484	7	21	14.9	112	5.37	31.2	1	16	5	Validation Cohor	Non-postoperative group	Malignant tumor	Nonhypertension	Non-Diabetes	Non-Chronic cardiac insufficiency	Non-Chronic liver disease	Non-Chronic renal insufficiency
868	female	71	8516	7159.69			survival	13	15.6	0.05	40.47	2273	10	27	15	96	12.56	45	2.3	27	9	Validation Cohor	Non-postoperative group	Physical disease	Hypertension	Non-Diabetes	Non-Chronic cardiac insufficiency	Non-Chronic liver disease	Non-Chronic renal insufficiency
869	male	52	20000				Death	3	0.4	7.49	51.43	540	111	135	34	84	11.85	26.8	2.3	18	7	Validation Cohor	Non-postoperative group	Physical disease	Nonhypertension	Non-Diabetes	Non-Chronic cardiac insufficiency	Non-Chronic liver disease	Non-Chronic renal insufficiency
870	female	72	16448.9				Death	3	17.9	27.34	15.08	2980	152	261	13.2	111	3.71	39.7	1.8	28	13	Validation Cohor	Non-postoperative group	Physical disease	Nonhypertension	Non-Diabetes	Non-Chronic cardiac insufficiency	Non-Chronic liver disease	Non-Chronic renal insufficiency
871	male	75	16448.9				Death	3	12.2	0.62	167.55	762	48	61	33.6	122	10.52	42.5	1.5	18	7	Validation Cohor	Non-postoperative group	Physical disease	Nonhypertension	Non-Diabetes	Non-Chronic cardiac insufficiency	Non-Chronic liver disease	Non-Chronic renal insufficiency
872	male	71	4857.83				survival	2	13.2	0.47	2.36	7156	8	18	18.2	173	17.77	29.6	2.1	19	2	Validation Cohor	Non-postoperative group	Physical disease	Nonhypertension	Diabetes	Non-Chronic cardiac insufficiency	Non-Chronic liver disease	Chronic renal insufficiency
873	male	60	3306.75	7711.56			Death	24	7.3	71.48	364.84	3658	33	33	22.9	345	17.08	42.4	0.9	13	14	Validation Cohor	Non-postoperative group	Physical disease	Hypertension	Diabetes	Non-Chronic cardiac insufficiency	Non-Chronic liver disease	Chronic renal insufficiency
874	male	79	2906.46	5428.89			Death	4	35.3	33.38	107.57	16874	68	63	386.9	428	40.17	30.3	1	23	13	Validation Cohor	Non-postoperative group	Malignant tumor	Hypertension	Diabetes	Non-Chronic cardiac insufficiency	Chronic liver disease	Chronic renal insufficiency
875	female	48	16448.9	7184.29			Death	7	11.6	53.53	267.77	16894	7	27	21.9	164	15.5	42.7	3.6	17	16	Validation Cohor	Non-postoperative group	Malignant tumor	Nonhypertension	Non-Diabetes	Non-Chronic cardiac insufficiency	Non-Chronic liver disease	Chronic renal insufficiency
876	female	48	1741.04	2065.56			survival	6	5.9	0.05	121.24	63	39	50	15.5	70	6.69	34.7	0.9	12	4	Validation Cohor	Non-postoperative group	Physical disease	Nonhypertension	Non-Diabetes	Non-Chronic cardiac insufficiency	Non-Chronic liver disease	Non-Chronic renal insufficiency
877	male	40	16448.9	15057.9			survival	6	2.3	2.45	21.9	25000	7	13	22.5	683	20.2	60.3	0.7	24	9	Validation Cohor	Non-postoperative group	Physical disease	Nonhypertension	Non-Diabetes	Non-Chronic cardiac insufficiency	Non-Chronic liver disease	Chronic renal insufficiency
878	male	51	5056.81				Death	14	18.6	0.47	141.39	77	7	28	123.8	100	15.45	38.3	3	18	11	Validation Cohor	Non-postoperative group	Severe injury	Nonhypertension	Non-Diabetes	Non-Chronic cardiac insufficiency	Chronic liver disease	Non-Chronic renal insufficiency
879	male	73	2658.09				survival	2	23.9	0.05	7.38	48	7	25	22.6	151	7.34	32.2	7.1	25	10	Validation Cohor	Non-postoperative group	Physical disease	Nonhypertension	Non-Diabetes	Non-Chronic cardiac insufficiency	Non-Chronic liver disease	Non-Chronic renal insufficiency
880	female	77	6805.69	16448.9			Death	3	23.7	8.58	180.43	5585	75	449	32.7	100	15.96	83.3	3.1	18	7	Validation Cohor	Non-postoperative group	Physical disease	Hypertension	Non-Diabetes	Chronic cardiac insufficiency	Chronic liver disease	Non-Chronic renal insufficiency
881	male	47	3447.24				survival	8	7	0.91	400	549	7	16	9	4.3	42	31.9	1.3	16	9	Validation Cohor	Non-postoperative group	Physical disease	Nonhypertension	Non-Diabetes	Non-Chronic cardiac insufficiency	Non-Chronic liver disease	Non-Chronic renal insufficiency
882	female	60	4260.78				survival	2	15.7	0.83	1.9	572	36	146	12.4	67	3.74	25.2	2.6	18	7	Validation Cohor	Non-postoperative group	Physical disease	Nonhypertension	Non-Diabetes	Non-Chronic cardiac insufficiency	Non-Chronic liver disease	Non-Chronic renal insufficiency
883	female	65	2130.18				survival	3	8.8	0.14	29.42	47	8	23	14.5	68	7.04	29.9	0.8	18	7	Validation Cohor	Non-postoperative group	Physical disease	Hypertension	Non-Diabetes	Non-Chronic cardiac insufficiency	Non-Chronic liver disease	Non-Chronic renal insufficiency
884	female	71	5619.91				Death	2	5.9	51.06	350	3485	7	24	24.4	78	11.56	26.4	3.2	17	12	Validation Cohor	Non-postoperative group	Malignant tumor	Hypertension	Diabetes	Non-Chronic cardiac insufficiency	Non-Chronic liver disease	Non-Chronic renal insufficiency
885	male	65	3248.4	5153.85			survival	7	7.8	0.09	65.37	7802	28	13	14.6	81	9.14	28.1	0.8	18	7	Validation Cohor	Non-postoperative group	Physical disease	Hypertension	Non-Diabetes	Non-Chronic cardiac insufficiency	Non-Chronic liver disease	Non-Chronic renal insufficiency
886	female	71	4679.47	16448.9			Death	5	8.5	0.06	82.04	450	41	44	6.2	35	6.06	43.8	4.6	18	7	Validation Cohor	Non-postoperative group	Malignant tumor	Nonhypertension	Non-Diabetes	Non-Chronic cardiac insufficiency	Non-Chronic liver disease	Non-Chronic renal insufficiency
887	female	78	13186.2				Death	3	8.4	0.14	48.44	1170	7	20	19	79	6.89	36.4	0.8	18	7	Validation Cohor	Non-postoperative group	Severe injury	Hypertension	Diabetes	Non-Chronic cardiac insufficiency	Non-Chronic liver disease	Non-Chronic renal insufficiency
888	male	63	2339.13				survival	3	9.2	0.08	1.51	5629	7	13	3.3	624	14.45	35.2	1.7	18	7	Validation Cohor	Non-postoperative group	Physical disease	Hypertension	Diabetes	Non-Chronic cardiac insufficiency	Non-Chronic liver disease	Chronic renal insufficiency
889	male	75	4295.78	2553.73			survival	4	11.9	18.27	43.67	12109	12	41	10.8	82	6.63	41.4	0.5	18	7	Validation Cohor	Non-postoperative group	Physical disease	Nonhypertension	Non-Diabetes	Chronic cardiac insufficiency	Non-Chronic liver disease	Non-Chronic renal insufficiency
890	male	62	5352.41				survival	7	19.1	26.83	223.47	5675	28	71	5.8	875	33.92	32.1	1.4	21	6	Validation Cohor	Non-postoperative group	Physical disease	Hypertension	Diabetes	Non-Chronic cardiac insufficiency	Non-Chronic liver disease	Chronic renal insufficiency
891	male	51	2305.72				Death	3	3.1	114.01	379.6	15619	7	34	74.7	219	12.56	52.4	9	17	17	Validation Cohor	Non-postoperative group	Malignant tumor	Nonhypertension	Non-Diabetes	Non-Chronic cardiac insufficiency	Non-Chronic liver disease	Chronic renal insufficiency
892	male	74	8516				survival	2	8.5	0.25	27.2	458	7	23	7.2	65	7.42	35.1	0.9	5	1	Validation Cohor	Non-postoperative group	Physical disease	Nonhypertension	Non-Diabetes	Non-Chronic cardiac insufficiency	Non-Chronic liver disease	Non-Chronic renal insufficiency
893	male	53	2487.61				survival	3	15.8	0.05	5.46	187	9	21	17.1	87	3.55	35.3	4.7	22	8	Validation Cohor	Non-postoperative group	Physical disease	Hypertension	Non-Diabetes	Non-Chronic cardiac insufficiency	Non-Chronic liver disease	Non-Chronic renal insufficiency
894	female	73	7060.85	4479.61			survival	5	14.8	0.23	22.26	1619	8	18	4.3	277	23.28	30.6	0.7	23	8	Validation Cohor	Non-postoperative group	Severe injury	Hypertension	Diabetes	Non-Chronic cardiac insufficiency	Non-Chronic liver disease	Chronic renal insufficiency
895	male	22	16448.9	3572.13			survival	16	12.7	0.67	89.3	418	29	91	24.9	510	25.18	31.2	0.9	27	7	Validation Cohor	Non-postoperative group	Physical disease	Nonhypertension	Diabetes	Non-Chronic cardiac insufficiency	Non-Chronic liver disease	Chronic renal insufficiency
896	female	67	4086.85				Death	3	10.2	0.38	26.83	25000	20	43	13.2	588	12.56	35.9	3.7	25	11	Validation Cohor	Non-postoperative group	Physical disease	Hypertension	Diabetes	Chronic cardiac insufficiency	Non-Chronic liver disease	Chronic renal insufficiency
897	female	49	824.07	1564.17			survival	12	15	0.49	43.67	104	7	13	4.2	34	6.91	27.5	2.4	18	7	Validation Cohor	Non-postoperative group	Physical disease	Nonhypertension	Non-Diabetes	Non-Chronic cardiac insufficiency	Non-Chronic liver disease	Non-Chronic renal insufficiency
898	male	62	16448.9				Death	2	1.6	18.6	253.35	1408	119	265	41.8	159	14.25	57.9	2.5	26	15	Validation Cohor	Non-postoperative group	Malignant tumor	Nonhypertension	Non-Diabetes	Non-Chronic cardiac insufficiency	Non-Chronic liver disease	Non-Chronic renal insufficiency
899	male	58	1233.69				survival	1	10.6	0.15	43.67	110	21	58	9.4	70	3.82	29.3	1.14	17	2	Validation Cohor	Non-postoperative group	Severe injury	Nonhypertension	Non-Diabetes	Non-Chronic cardiac insufficiency	Non-Chronic liver disease	Non-Chronic renal insufficiency
900	male	53	16448.9				survival	3	5.7	0.28	14.76	407	11	178	83.9	130	8.4	47.5	15	18	7	Validation Cohor	Non-postoperative group	Physical disease	Hypertension	Diabetes	Non-Chronic cardiac insufficiency	Chronic liver disease	Non-Chronic renal insufficiency
901	male	79	4410.51				survival	3	7.3	0.17	29.26	1379	7	22	14.5	133	9.12	33.3	0.71	18	7	Validation Cohor	Non-postoperative group	Physical disease	Nonhypertension	Non-Diabetes	Non-Chronic cardiac insufficiency	Non-Chronic liver disease	Non-Chronic renal insufficiency
902	female	72	16448.9				Death	3	20.3	0.4	80.59	10588	34	114	13.7	209	12.87	26.7	1.8	18	7	Validation Cohor	Non-postoperative group	Physical disease	Nonhypertension	Non-Diabetes	Non-Chronic cardiac insufficiency	Non-Chronic liver disease	Non-Chronic renal insufficiency
903	male	65	16448.9				Death	2	12.73	11.96	80	14774	64.92	117.69	29.62	154.1	12.56	38.7	8.1	18	7	Validation Cohor	Non-postoperative group	Severe injury	Nonhypertension	Non-Diabetes	Non-Chronic cardiac insufficiency	Non-Chronic liver disease	Chronic renal insufficiency
904	male	53	2235.12	4699.51			survival	4	30.4	21.93	307.16	1401	18	25	12.1	181	19.18	36.9	5.4	21	10	Validation Cohor	Non-postoperative group	Physical disease	Nonhypertension	Non-Diabetes	Non-Chronic cardiac insufficiency	Non-Chronic liver disease	Non-Chronic renal insufficiency
905	female	56	2171.38	1863.07			survival	4	7.9	17	99.97	7038	7	13	20	88	7.68	33.8	1.1	18	7	Validation Cohor	Non-postoperative group	Physical disease	Nonhypertension	Non-Diabetes	Non-Chronic cardiac insufficiency	Non-Chronic liver disease	Chronic renal insufficiency
906	male	87	16448.9				Death	3	8.4	52.34	135.57	25000	7	23	12.5	588	32.61	36.4	2.5	18	7	Validation Cohor	Non-postoperative group	Physical disease	Nonhypertension	Diabetes	Non-Chronic cardiac insufficiency	Non-Chronic liver disease	Chronic renal insufficiency
907	male	39	4549.64				survival	2	7.4	22.26	348.8	275	179	320	72.5	192	15.52	34	3.2	18	7	Validation Cohor	Non-postoperative group	Physical disease	Hypertension	Diabetes	Non-Chronic cardiac insufficiency	Non-Chronic liver disease	Chronic renal insufficiency
908	female	51	2146.59				survival	1	19.9	19.34	43.67	3903.07	64.92	117.69	29.62	154.1	12.56	38.7	2.5	18	7	Validation Cohor	Non-postoperative group	Severe injury	Hypertension	Non-Diabetes	Non-Chronic cardiac insufficiency	Non-Chronic liver disease	Non-Chronic renal insufficiency
909	female	41	690				survival	2	14.9	0.05	43.67	38	7	13	19.6	64	5.31	32	1.7	12	7	Validation Cohor	Non-postoperative group	Physical disease	Nonhypertension	Non-Diabetes	Non-Chronic cardiac insufficiency	Non-Chronic liver disease	Non-Chronic renal insufficiency
910	female	41	3736.89	7571.84			survival	6	13.5	19.34	43.67	3903.07	64.92	117.69	29.62	154.1	12.56	38.7	1.8	7	5	Validation Cohor	Non-postoperative group	Physical disease	Nonhypertension	Non-Diabetes	Non-Chronic cardiac insufficiency	Non-Chronic liver disease	Non-Chronic renal insufficiency
911	male	42	1255.16	2810.51			survival	7	16.9	0.05	18.24	31	22	35	11.5	150	5.61	26	1.6	18	7	Validation Cohor	Non-postoperative group	Physical disease	Nonhypertension	Non-Diabetes	Non-Chronic cardiac insufficiency	Non-Chronic liver disease	Chronic renal insufficiency
912	female	81	4024.06				survival	3	7.3	0.05	1.79	105	14	28	9.4	124	9.68	32.2	0.4	18	7	Validation Cohor	Non-postoperative group	Physical disease	Hypertension	Non-Diabetes	Non-Chronic cardiac insufficiency	Non-Chronic liver disease	Chronic renal insufficiency
913	male	36	7759.82				survival	7	11.3	0.12	17.2	13248	29	41	9.7	1971	49.73	56.9	0.7	18	7	Validation Cohor	Non-postoperative group	Physical disease	Hypertension	Non-Diabetes	Non-Chronic cardiac insufficiency	Non-Chronic liver disease	Chronic renal insufficiency
914	female	83	11568.3	7940.3			survival	6	12.4	19.34	204.37	3903.07	7	28	12.5	103	13.09	24.7	2.6	18	7	Validation Cohor	Non-postoperative group	Physical disease	Nonhypertension	Non-Diabetes	Non-Chronic cardiac insufficiency	Non-Chronic liver disease	Non-Chronic renal insufficiency
915	male	60	14105				Death	1	10.6	0.46	35.45	141	7	22	12.7	321	32.18	30.4	2.2	18	7	Validation Cohor	Non-postoperative group	Physical disease	Nonhypertension	Diabetes	Non-Chronic cardiac insufficiency	Non-Chronic liver disease	Non-Chronic renal insufficiency
916	male	65	4368.95				survival	8	9.4	0.27	88.31	180	7	17	14.8	100	13.26	31	0.9	18	7	Validation Cohor	Non-postoperative group	Physical disease	Hypertension	Non-Diabetes	Non-Chronic cardiac insufficiency	Non-Chronic liver disease	Non-Chronic renal insufficiency
917	female	56	5312.89				survival	6	18.3	3.57	185.53	819	27	31	20.5	49	6.06	25.8	4.2	18	7	Validation Cohor	Non-postoperative group	Malignant tumor	Nonhypertension	Non-Diabetes	Non-Chronic cardiac insufficiency	Non-Chronic liver disease	Non-Chronic renal insufficiency
918	female	83	7940.3				survival	6	10	0.5	101.09	2745	11	45	12.3	65	11.74	39.6	1.4	18	7	Validation Cohor	Non-postoperative group	Physical disease	Nonhypertension	Non-Diabetes	Non-Chronic cardiac insufficiency	Non-Chronic liver disease	Non-Chronic renal insufficiency
919	female	77	5633.45	4671.21			survival	7	12.9	0.18	43.67	4333	7	26	9.7	855	50.96	47.9	9.7	17	7	Validation Cohor	Non-postoperative group	Physical disease	Nonhypertension	Non-Diabetes	Chronic cardiac insufficiency	Non-Chronic liver disease	Chronic renal insufficiency
920	male	60	1846.43	2595.19			survival	6	17.2	19.34	29.4	3903.07	18	21	12.6	119	9.5	29.4	1.9	18	7	Validation Cohor	Non-postoperative group	Physical disease	Hypertension	Non-Diabetes	Non-Chronic cardiac insufficiency	Non-Chronic liver disease	Non-Chronic renal insufficiency
921	female	79	4801.79				survival	1	8.3	19.34	0.94	3903.07	7	33	6.7	118	11.4	35.6	8.9	18	7	Validation Cohor	Non-postoperative group	Severe injury	Nonhypertension	Non-Diabetes	Non-Chronic cardiac insufficiency	Non-Chronic liver disease	Non-Chronic renal insufficiency
922	female	58	4016.24				survival	6	9.7	19.34	43.67	3903.07	9	32	16.6	1001	22.92	22.2	0.4	29	5	Validation Cohor	Non-postoperative group	Severe injury	Hypertension	Diabetes	Non-Chronic cardiac insufficiency	Non-Chronic liver disease	Chronic renal insufficiency
923	male	18	1989.18	2300.19			survival	6	7	7.49	274.31	4576	7	60	14.2	783	27.66	39.4	0.6	18	7	Validation Cohor	Non-postoperative group	Physical disease	Hypertension	Non-Diabetes	Non-Chronic cardiac insufficiency	Non-Chronic liver disease	Chronic renal insufficiency
924	male	38	1833.74	5635.17			survival	7	4.7	0.3	65.08	19782	64.92	117.69	29.62	154.1	12.56	29.19	3	18	7	Validation Cohor	Non-postoperative group	Physical disease	Hypertension	Non-Diabetes	Non-Chronic cardiac insufficiency	Non-Chronic liver disease	Chronic renal insufficiency
925	female	76	1752.28	1953.43			survival	5	16.1	19.34	59.64	3903.07	7	16	3.3	75	6.61	28.2	4.5	23	7	Validation Cohor	Non-postoperative group	Physical disease	Nonhypertension	Non-Diabetes	Non-Chronic cardiac insufficiency	Non-Chronic liver disease	Non-Chronic renal insufficiency
926	male	70	4008.29				survival	3	13.2	1.66	126.66	25000	7	23	10.4	669	12.56	1.72	0.8	18	7	Validation Cohor	Non-postoperative group	Physical disease	Nonhypertension	Non-Diabetes	Non-Chronic cardiac insufficiency	Non-Chronic liver disease	Chronic renal insufficiency
927	male	56	16448.9				Death	3	5.7	1.07	151.467	1449	14	58	38.6	100	12.56	37.3	0.7	18	7	Validation Cohor	Non-postoperative group	Physical disease	Nonhypertension	Non-Diabetes	Non-Chronic cardiac insufficiency	Non-Chronic liver disease	Non-Chronic renal insufficiency
928	male	76	16448.9				Death	3	24.7	0.23	73.77	13551	9	40	15.5	76	12.56	38.8	9.7	18	7	Validation Cohor	Non-postoperative group	Physical disease	Nonhypertension	Non-Diabetes	Non-Chronic cardiac insufficiency	Non-Chronic liver disease	Non-Chronic renal insufficiency
929	male	66	3578.54				survival	2	10.8	0.08	10.12	9.7	10	11	9.7	100	9.2	30.4	0.7	18	7	Validation Cohor	Non-postoperative group	Physical disease	Hypertension	Diabetes	Chronic cardiac insufficiency	Non-Chronic liver disease	Non-Chronic renal insufficiency
930	female	67	1156.57	1824.98			survival	5	5.4	3.25	64.2	199951	7	14	9.3	564	33.33	35.4	1	14	6	Validation Cohor	Non-postoperative group	Physical disease	Hypertension	Diabetes	Chronic cardiac insufficiency	Non-Chronic liver disease	Chronic renal insufficiency
931	female	55	2259.5	2113.55			survival	4	10.4	1.96	236.95	169	14	17	75.3	49	6	29.9	1.1	13	6	Validation Cohor	Non-postoperative group	Physical disease	Nonhypertension	Non-Diabetes	Non-Chronic cardiac insufficiency	Non-Chronic liver disease	Non-Chronic renal insufficiency
932	female	46	6198.33				survival	1	3.7	63.06	49.33	766	7	24	180.3	73	12.25	60.3	2.9	18	7	Validation Cohor	Non-postoperative group	Physical disease	Nonhypertension	Non-Diabetes	Non-Chronic cardiac insufficiency	Chronic liver disease	Non-Chronic renal insufficiency
933	male	58	2590.89	2171.12			survival	5	10.4	1.73	80.45	105	12	23	47.9	76	12.56	30.6	1.3	12	10	Validation Cohor	Non-postoperative group	Severe injury	Nonhypertension	Non-Diabetes	Non-Chronic cardiac insufficiency	Non-Chronic liver disease	Non-Chronic renal insufficiency
934	female	70	16042.5	16448.9			survival	4	16.8	33.55	90.79	25000	7	60	8.2	262	12.56	28.3	3.2	16	10	Validation Cohor	Non-postoperative group	Physical disease	Nonhypertension	Non-Diabetes	Chronic cardiac insufficiency	Non-Chronic liver disease	Chronic renal insufficiency
935	male	77	1998.42	2447.32			survival	5	19	0.47	92.57	845	37	65	10.7	104	7.4	34.8	1.6	14	1	Validation Cohor	Non-postoperative group	Physical disease	Nonhypertension	Non-Diabetes	Non-Chronic cardiac insufficiency	Non-Chronic liver disease	Non-Chronic renal insufficiency
936	female	40	4464.93				survival	4	7.9	0.05	16.05	13406	31	61	68.4	71	7.2	32.2	2.2	18	9	Validation Cohor	Non-postoperative group	Physical disease	Nonhypertension	Non-Diabetes	Chronic cardiac insufficiency	Chronic liver disease	Non-Chronic renal insufficiency
937	male	63	1685.03				survival	2	12.2	0.05	18.57	1987	7	20	21.6	67	11.31	32.2	0.8	7	3	Validation Cohor	Non-postoperative group	Physical disease	Nonhypertension	Non-Diabetes	Chronic cardiac insufficiency	Non-Chronic liver disease	Non-Chronic renal insufficiency
938	male	55	7394.34				survival	3	13	2.26	59.45	4088	7	28	31.9	667	38.3	49.4	1.9	18	7	Validation Cohor	Non-postoperative group	Physical disease	Nonhypertension	Non-Diabetes	Non-Chronic cardiac insufficiency	Non-Chronic liver disease	Non-Chronic renal insufficiency
939	male	49	2177.82	1994.45			survival	3	17.6	19.34	43.67	3903.07	34	188	18.9	92	11.38	35.7	1	18	7	Validation Cohor	Non-postoperative group	Severe injury	Nonhypertension	Non-Diabetes	Non-Chronic cardiac insufficiency	Chronic liver disease	Non-Chronic renal insufficiency
940	female	71	6581.37				survival	3	7.3	0.15	76.48	287	7	20	19.5	56	12.56	27.9	5.3	20	8	Validation Cohor	Non-postoperative group	Malignant tumor	Nonhypertension	Non-Diabetes	Non-Chronic cardiac insufficiency	Non-Chronic liver disease	Non-Chronic renal insufficiency
941	male	40	3102.51	1139.71			survival	6	17.5	5.76	284.23	134	8	28	36.4	84	4.29	34.1	0.95	6	17	Validation Cohor	Non-postoperative group	Physical disease	Nonhypertension	Non-Diabetes	Non-Chronic cardiac insufficiency	Non-Chronic liver disease	Chronic renal insufficiency
942	male	70	7419.92				survival	2	10.1	19.34	43.67	3903.07	7	17	6.4	502	24.81	38.5	0.91	21	7	Validation Cohor	Non-postoperative group	Severe injury	Hypertension	Diabetes	Non-Chronic cardiac insufficiency	Non-Chronic liver disease	Chronic renal insufficiency
943	female	51	16448.9				Death	1	9.5	19.34	80	3903.07	75	180	9.1	202	6.1	34	15	18	7	Validation Cohor	Non-postoperative group	Physical disease	Nonhypertension	Diabetes	Non-Chronic cardiac insufficiency	Non-Chronic liver disease	Non-Chronic renal insufficiency
944	male	48	5155.35				survival	2	6.3	0.05	59.35	98	10	37	11.4	65	5.93	35.6	1.1	6	7	Validation Cohor	Non-postoperative group	Physical disease	Nonhypertension	Non-Diabetes	Non-Chronic cardiac insufficiency	Non-Chronic liver disease	Non-Chronic renal insufficiency
945	male	55	12064.6	8280.13			Death	5	20.1	47.51	390.8	22045	47	164	37.3	172	16.74	75.1	2.9	23	13	Validation Cohor	Non-postoperative group	Physical disease	Nonhypertension	Non-Diabetes	Chronic cardiac insufficiency	Non-Chronic liver disease	Chronic renal insufficiency
946	female	73	10595	9912.94			survival	5	8.8	0.08	34.54	4410	64.92	117.69	29.62	154.1	12.56	38.7	0.6	11	3	Validation Cohor	Non-postoperative group	Severe injury	Nonhypertension	Non-Diabetes	Non-Chronic cardiac insufficiency	Non-Chronic liver disease	Chronic renal insufficiency
947	male	71	5830.46				survival	3	4.9	0.05	10.52	1098	22	25	14.3	104	12.56	51.4	2.7	18	7	Validation Cohor	Non-postoperative group	Physical disease	Nonhypertension	Non-Diabetes	Chronic cardiac insufficiency	Non-Chronic liver disease	Non-Chronic renal insufficiency
948	male	35	7491.35				survival	1	15.8	1.61	8.51	1104	7	15	10.9	878	11.07	33.9	2.8	8	10	Validation Cohor	Non-postoperative group	Physical disease	Nonhypertension	Non-Diabetes	Non-Chronic cardiac insufficiency	Non-Chronic liver disease	Chronic renal insufficiency
949	female	48	1344.69				survival	4	25.1	0.06	25.38	65	7	13	13.3	48	4.06	26.1	0.3	12	3	Validation Cohor	Non-postoperative group	Physical disease	Nonhypertension	Non-Diabetes	Non-Chronic cardiac insufficiency	Non-Chronic liver disease	Non-Chronic renal insufficiency
950	male	37	8181.72	3516.83			survival	4	10.9	93.33	47.63	72	399	517	130.5	103	18.94	55.1	1.97	8	6	Validation Cohor	Non-postoperative group	Physical disease	Nonhypertension	Non-Diabetes	Non-Chronic cardiac insufficiency	Non-Chronic liver disease	Non-Chronic renal insufficiency
951	female	58	7546.16				Death	2	4.6	35	321.81	162.57	7	47	16.8	261	14.7	39	10.4	18	7	Validation Cohor	Non-postoperative group	Physical disease	Nonhypertension	Non-Diabetes	Non-Chronic cardiac insufficiency	Non-Chronic liver disease	Non-Chronic renal insufficiency
952	female	66	9087.74				survival	4	16.9	2.4	346	1360	7	34	40.9	93	12.56	35.6	1.4	18	7	Validation Cohor	Non-postoperative group	Physical disease	Nonhypertension	Non-Diabetes	Non-Chronic cardiac insufficiency	Non-Chronic liver disease	Non-Chronic renal insufficiency
953	male	68	2947.46				survival	4	22.9	0.92	4.53	621	20	40	20.2	84	4.7	23.5	3.8	18	7	Validation Cohor	Non-postoperative group	Severe injury	Nonhypertension	Non-Diabetes	Non-Chronic cardiac insufficiency	Non-Chronic liver disease	Non-Chronic renal insufficiency
954	female	75	5361.99	4238.88			survival	4	11.9	0.05	9.96	25000	7	22	12.3	401	13.81	131.5	3.9	25	7	Validation Cohor	Non-postoperative group	Physical disease	Hypertension	Non-Diabetes	Chronic cardiac insufficiency	Non-Chronic liver disease	Chronic renal insufficiency
955	female	64	16448.9				Death	2	39	47.88	71.18	10499	645	1552	12	110	9.33	32.1	8.7	28	13	Validation Cohor	Non-postoperative group	Physical disease	Hypertension	Non-Diabetes	Non-Chronic cardiac insufficiency	Non-Chronic liver disease	Non-Chronic renal insufficiency
956	male	44	663.93				survival	2	12.73	0.05	43.67	44	64.92	117.69	29.62	154.1	12.56	38.7	0.7	13	7	Validation Cohor	Non-postoperative group	Other	Nonhypertension	Non-Diabetes	Non-Chronic cardiac insufficiency	Non-Chronic liver disease	Non-Chronic renal insufficiency
957	male	74	5004.93				Death	2	6.2	77.93	233.36	3267	57	58	37.4	60	9.46	35.1	1.7	16	15	Validation Cohor	Non-postoperative group	Severe injury	Nonhypertension	Non-Diabetes	Non-Chronic cardiac insufficiency	Non-Chronic liver disease	Non-Chronic renal insufficiency
958	female	76	1527.07				survival	3	7.8	0.1	43.67	878	89	16	12.5	254	7.34	74.2	3	18	7	Validation Cohor	Non-postoperative group	Severe injury	Nonhypertension	Non-Diabetes	Non-Chronic cardiac insufficiency	Non-Chronic liver disease	Chronic renal insufficiency
959	female	67	16448.9				Death	2	5.3	74.08	281.53	3086	120	739	27.7	100	21.29	61.1	8.38	18	7	Validation Cohor	Non-postoperative group	Severe injury	Nonhypertension	Diabetes	Non-Chronic cardiac insufficiency	Chronic liver disease	Chronic renal insufficiency
960	male	35	2152.63	1726.53			survival	4	11	0.14	2.36	1010	17	51	272.8	84	16.59	180	1	12	11	Validation Cohor	Non-postoperative group	Malignant tumor	Nonhypertension	Non-Diabetes	Non-Chronic cardiac insufficiency	Chronic liver disease	Chronic renal insufficiency
961	male	63	1985.88				survival	3	5.3	3.79	85.3	3295	11	36	17.4	97	10.13	29.7	0.8	14	3	Validation Cohor	Non-postoperative group	Physical disease	Hypertension	Diabetes	Non-Chronic cardiac insufficiency	Non-Chronic liver disease	Chronic renal insufficiency
962	male	76	9242.11				survival	2	1.9	50.03	234.8	22512	7	164	22.5	166	19.79	38.2	5.17	18	7	Validation Cohor	Non-postoperative group	Physical disease	Nonhypertension	Non-Diabetes	Non-Chronic cardiac insufficiency	Chronic liver disease	Chronic renal insufficiency
963	male	62	8601.68	911.9			survival	5	34.3	2.43	82.76	529	76	58	14.3	143	20.14	31.4	1.5	26	9	Validation Cohor	Non-postoperative group	Physical disease	Nonhypertension	Non-Diabetes	Non-Chronic cardiac insufficiency	Non-Chronic liver disease	Non-Chronic renal insufficiency
964	male	50	8022.24				survival	2	11.9	0.11	30.39	31	10	35	38.1	162	13.06	36.8	2.6	18	7	Validation Cohor	Non-postoperative group	Physical disease	Hypertension	Non-Diabetes	Non-Chronic cardiac insufficiency	Non-Chronic liver disease	Non-Chronic renal insufficiency
965	male	51	5812.16				survival	3	10.6	0.14	46.59	17925	7	13	5.2	342	12.34	36.3	0.5	18	7	Validation Cohor	Non-postoperative group	Physical disease	Hypertension	Diabetes	Chronic cardiac insufficiency	Non-Chronic liver disease	Chronic renal insufficiency
966	male	71	2680.17	3099.33			survival	5	6.8	0.97	117.64	25000	7	50	8.9	782	19.28	29.3	1.24	23	9	Validation Cohor	Non-postoperative group	Severe injury	Hypertension	Non-Diabetes	Non-Chronic cardiac insufficiency	Non-Chronic liver disease	Chronic renal insufficiency
967	female	61	12738.9	12354.1			survival	17	10.2	0.12	35.68	684	58	49	9.7	49	3.95	30.7	0.6	24	3	Validation Cohor	Non-postoperative group	Physical disease	Nonhypertension	Non-Diabetes	Non-Chronic cardiac insufficiency	Non-Chronic liver disease	Non-Chronic renal insufficiency
968	male	15	4659.48	3402.35			survival	4	8.6	12.38	152.46	556	79	45	11.1	210	24.59	31.2	1.8	29	10	Validation Cohor	Non-postoperative group	Physical disease	Nonhypertension	Diabetes	Non-Chronic cardiac insufficiency	Non-Chronic liver disease	Chronic renal insufficiency
969	male	67	12213.4	11732			Death	5	6.7	0.64	9.95	2404	12	24	61.7	219	22.74	91.4	2.5	26	14	Validation Cohor	Non-postoperative group	Severe injury	Nonhypertension	Non-Diabetes	Chronic cardiac insufficiency	Chronic liver disease	Non-Chronic renal insufficiency
970	female	72	3592.04	1899.02			survival	4	10.3	0.09	43.67	745	7	22	8.8	51	11.16	26.1	0.94	17	7	Validation Cohor	Non-postoperative group	Physical disease	Nonhypertension	Non-Diabetes	Non-Chronic cardiac insufficiency	Non-Chronic liver disease	Non-Chronic renal insufficiency
971	female	60	3392.92				survival	2	6.5	0.57	32.73	2015	7	18	6.5	84	12.47	23	0.86	21	4	Validation Cohor	Non-postoperative group	Malignant tumor	Hypertension	Diabetes	Non-Chronic cardiac insufficiency	Non-Chronic liver disease	Non-Chronic renal insufficiency
972	female	81	6664.34				survival	4	16.8	0.53	31.71	1483	13	13	15.5	55	7.54	28.7	0.7	22	9	Validation Cohor	Non-postoperative group	Severe injury	Nonhypertension	Non-Diabetes	Non-Chronic cardiac insufficiency	Non-Chronic liver disease	Non-Chronic renal insufficiency
973	male	46	5381.28				survival	3	8.1	67.77	238.44	788	21	46	77.6	128	6.76	31.3	1.2	18	7	Validation Cohor	Non-postoperative group	Malignant tumor	Hypertension	Diabetes	Non-Chronic cardiac insufficiency	Non-Chronic liver disease	Non-Chronic renal insufficiency
974	male	73	5553.2	1786.88			survival	4	10.4	0.09	146.6	1249	7	20	7.6	109	4.56	32.3	1.7	23	9	Validation Cohor	Non-postoperative group	Malignant tumor	Hypertension	Diabetes	Non-Chronic cardiac insufficiency	Non-Chronic liver disease	Non-Chronic renal insufficiency
975	male	74	3425.66				survival	1	11.3	79.1	43.67	3903.07	12	17	7.7	90	8.2	34.4	0.8	18	7	Validation Cohor	Non-postoperative group	Physical disease	Hypertension	Non-Diabetes	Non-Chronic cardiac insufficiency	Non-Chronic liver disease	Non-Chronic renal insufficiency
976	male	71	8088.12	11060.8			Death	5	2.4	7.18	80	272	37	64	30.6	121	10.46	42.1	8.2	16	14	Validation Cohor	Non-postoperative group	Physical disease	Nonhypertension	Non-Diabetes	Non-Chronic cardiac insufficiency	Non-Chronic liver disease	Non-Chronic renal insufficiency
977	male	70	6566.79				survival	3	12	0.06	11.04	940	7	24	19.3	130	6.31	43.7	3.9	18	9	Validation Cohor	Non-postoperative group	Physical disease	Hypertension	Non-Diabetes	Non-Chronic cardiac insufficiency	Non-Chronic liver disease	Non-Chronic renal insufficiency
978	female	60	1512.56				survival	3	2.3	0.43	8.43	783	7	23	39.1	56	5.69	43.2	1.8	18	7	Validation Cohor	Non-postoperative group	Severe injury	Nonhypertension	Diabetes	Non-Chronic cardiac insufficiency	Chronic liver disease	Non-Chronic renal insufficiency
979	male	37	1275.07				survival	3	12.5	0.26	22.19	44	7	13	9.4	56	13.81	26.5	1.3	23	6	Validation Cohor	Non-postoperative group	Severe injury	Nonhypertension	Non-Diabetes	Non-Chronic cardiac insufficiency	Non-Chronic liver disease	Non-Chronic renal insufficiency
980	female	50	11439.1				Death	3	20.1	1.94	74.65	500	7	18	47.1	63	9.69	48.4	3.5	37	16	Validation Cohor	Non-postoperative group	Physical disease	Nonhypertension	Non-Diabetes	Chronic cardiac insufficiency	Non-Chronic liver disease	Non-Chronic renal insufficiency
981	male	76	4680.95				survival	3	4.3	0.22	43.67	405	7	13	23.4	70	23.08	36.7	0.8	14	11	Validation Cohor	Non-postoperative group	Severe injury	Nonhypertension	Diabetes	Non-Chronic cardiac insufficiency	Chronic liver disease	Non-Chronic renal insufficiency
982	female	72	7596.04	9844.4			survival	4	4.9	0.3	36.44	23827	64.92	117.69	29.62	154.1	12.56	35.3	0.9	18	7	Validation Cohor	Non-postoperative group	Physical disease	Nonhypertension	Non-Diabetes	Non-Chronic cardiac insufficiency	Non-Chronic liver disease	Chronic renal insufficiency
983	female	68	6791.15				Death	3	5.9	0.27	88.48	1395	7	20	5.7	96	11.95	42.2	1	29	12	Validation Cohor	Non-postoperative group	Malignant tumor	Hypertension	Diabetes	Non-Chronic cardiac insufficiency	Non-Chronic liver disease	Non-Chronic renal insufficiency
984	female	32	3278.4				Death	3	39.2	2.44	257.98	2990	64.92	117.69	29.62	154.1	12.56	31.4	2.6	18	7	Validation Cohor	Non-postoperative group	Physical disease	Nonhypertension	Non-Diabetes	Chronic cardiac insufficiency	Non-Chronic liver disease	Non-Chronic renal insufficiency
985	male	69	2703.79	1530.18			survival	4	7.6	1.24	286.57	146	12	22	61.8	54	12.56	96.6	1.8	18	3	Validation Cohor	Non-postoperative group	Malignant tumor	Nonhypertension	Non-Diabetes	Non-Chronic cardiac insufficiency	Non-Chronic liver disease	Non-Chronic renal insufficiency
986	male	27	5410.83				survival	4	75.9	0.05	43.67	1982	7	13	18.4	977	24.62	40.2	1.5	12	5	Validation Cohor	Non-postoperative group	Malignant tumor	Hypertension	Non-Diabetes	Non-Chronic cardiac insufficiency	Non-Chronic liver disease	Chronic renal insufficiency
987	male	73	1932.26	1448.39			survival	6	6.6	0.05	3.34	1634	32	24	12.7	56	10.02	30.4	0.6	21	8	Validation Cohor	Non-postoperative group	Physical disease	Hypertension	Diabetes	Chronic cardiac insufficiency	Non-Chronic liver disease	Non-Chronic renal insufficiency
988	male	65	12423.6				Death	2	5.8	360	102.9	4.48	15	101	82.4	509	44.08	88.7	9.4	39	18	Validation Cohor	Non-postoperative group	Severe injury	Nonhypertension	Non-Diabetes	Non-Chronic cardiac insufficiency	Non-Chronic liver disease	Chronic renal insufficiency
989	female	59	731.87	1665.77			survival	5	10.5	0.05	15.98	3011	7	15	13.4	62	3.96	31.5	1.4	9	7	Validation Cohor	Non-postoperative group	Physical disease	Nonhypertension	Non-Diabetes	Non-Chronic cardiac insufficiency	Non-Chronic liver disease	Non-Chronic renal insufficiency
990	male	81	7284.61	2086.14			Death	5	16	0.05	78.65	332	7	13	9.3	49	6.68	35.2	1.2	22	11	Validation Cohor	Non-postoperative group	Physical disease	Nonhypertension	Diabetes	Non-Chronic cardiac insufficiency	Non-Chronic liver disease	Non-Chronic renal insufficiency
991	male	42	7715.5				survival	3	18	1.12	64.79	473	7	108	479.4	93	10.2	70.6	0.94	19	8	Validation Cohor	Non-postoperative group	Physical disease	Nonhypertension	Non-Diabetes	Non-Chronic cardiac insufficiency	Chronic liver disease	Non-Chronic renal insufficiency
992	female	56	1626.95	472.47			survival	3	8.3	0.55	145.12	5034	13	40	6.5	65	6.11	26.6	1.1	27	11	Validation Cohor	Non-postoperative group	Physical disease	Nonhypertension	Non-Diabetes	Chronic cardiac insufficiency	Chronic liver disease	Non-Chronic renal insufficiency
993	female	69	2200.67	1336.28			survival	4	6.2	0.1	43.67	767	7	39	7.8	45	2.67	180	1	27	7	Validation Cohor	Non-postoperative group	Malignant tumor	Nonhypertension	Non-Diabetes	Non-Chronic cardiac insufficiency	Non-Chronic liver disease	Non-Chronic renal insufficiency
994	male	75	3290.08	16448.9			Death	8	12.2	11.01	333.3	2418	46	62	44.3	72	7.6	36.1	1.8	29	14	Validation Cohor	Non-postoperative group	Physical disease	Hypertension	Non-Diabetes	Non-Chronic cardiac insufficiency	Non-Chronic liver disease	Non-Chronic renal insufficiency
995	male	74	3533.61	1838.22			survival	3	13.2	43.44	287.8	587	21	66	17.2	159	13.11	39.1	6.5	23	6	Validation Cohor	Non-postoperative group	Physical disease	Hypertension	Non-Diabetes	Non-Chronic cardiac insufficiency	Non-Chronic liver disease	Non-Chronic renal insufficiency
996	male	47	8582.77				survival	3	22.9	43.22	302.44	25000	7	13	23	824	23.21	54.3	0.9	18	7	Validation Cohor	Non-postoperative group	Physical disease	Nonhypertension	Non-Diabetes	Non-Chronic cardiac insufficiency	Non-Chronic liver disease	Chronic renal insufficiency
997	female	51	1774.65				survival	3	2.6	0.05	4.14	522	20	35	17.3	52	6.18	35.9	1.1	18	7	Validation Cohor	Non-postoperative group	Severe injury	Nonhypertension	Non-Diabetes	Non-Chronic cardiac insufficiency	Chronic liver disease	Non-Chronic renal insufficiency
998	male	61	1171.81	1527.49			survival	4	10.3	0.05	9.03	15	26	35	9.9	68	4.45	35.1	0.7	17	5	Validation Cohor	Non-postoperative group	Malignant tumor	Hypertension	Diabetes	Non-Chronic cardiac insufficiency	Chronic liver disease	Non-Chronic renal insufficiency
999	male	75	10074.9				Death	3	9.2	0.34	42.97	4902	20	37	8	119	12.56	34.6	1	18	7	Validation Cohor	Non-postoperative group	Physical disease	Hypertension	Diabetes	Non-Chronic cardiac insufficiency	Non-Chronic liver disease	Non-Chronic renal insufficiency
1000	male	52	16448.9				Death	2	3.9	58.61	253	5059	101	273	146.3	282	12.56	31.5	2.7	18	7	Validation Cohor	Non-postoperative group	Physical disease	Nonhypertension	Non-Diabetes	Non-Chronic cardiac insufficiency	Chronic liver disease	Chronic renal insufficiency
1001	male	70	1800.1				survival	2	12.5	0.12	9.42	1262	152	94	10.3	61	7.84	28.9	1.1	18	7	Validation Cohor	Non-postoperative group	Other	Nonhypertension	Non-Diabetes	Non-Chronic cardiac insufficiency	Non-Chronic liver disease	Non-Chronic renal insufficiency
1002	female	83	3363.21				survival	4	12.5	1.04	125.04	15684	7	16	9.2	166	9.37	180	0.71	18	7	Validation Cohor	Non-postoperative group	Physical disease	Hypertension	Diabetes	Chronic cardiac insufficiency	Non-Chronic liver disease	Chronic renal insufficiency
1003	female	72	1035.31				survival	3	25.6	42.32	43.67	3514	7	13	13.8	81	13.49	28.3	1	18	7	Validation Cohor	Non-postoperative group	Physical disease	Nonhypertension	Non-Diabetes	Non-Chronic cardiac insufficiency	Non-Chronic liver disease	Non-Chronic renal insufficiency
1004	male	61	3843.2	9821.17			Death	10	13.2	0.91	161.85	1982	17	27	42	47	4.65	37.7	1	12	7	Validation Cohor	Non-postoperative group	Severe injury	Hypertension	Non-Diabetes	Non-Chronic cardiac insufficiency	Non-Chronic liver disease	Non-Chronic renal insufficiency
1005	female	74	4376.75				survival	5	2.1	70.51	162.87	21347	7	16	6.2	419	12.56	53	6.5	18	7	Validation Cohor	Non-postoperative group	Malignant tumor	Nonhypertension	Non-Diabetes	Non-Chronic cardiac insufficiency	Non-Chronic liver disease	Non-Chronic renal insufficiency
1006	male	61	2911.77				survival	2	8.1	0.05	254.76	579	7	17	12	52	3.92	60.2	0.97	18	7	Validation Cohor	Non-postoperative group	Severe injury	Nonhypertension	Non-Diabetes	Non-Chronic cardiac insufficiency	Non-Chronic liver disease	Non-Chronic renal insufficiency
1007	female	81	3741.02				survival	2	15.8	0.09	43.67	8414	7	25	19.8	88	9.8	54.5	1.8	18	7	Validation Cohor	Non-postoperative group	Physical disease	Nonhypertension	Non-Diabetes	Non-Chronic cardiac insufficiency	Non-Chronic liver disease	Chronic renal insufficiency
1008	male	45	14024.5	10603.8			Death	5	13.6	0.06	105.61	207	91	42	13.5	154	11.42	25.8	2.1	18	7	Validation Cohor	Non-postoperative group	Other	Nonhypertension	Non-Diabetes	Non-Chronic cardiac insufficiency	Non-Chronic liver disease	Non-Chronic renal insufficiency
1009	female	76	6261.76	3753.5			survival	3	10.2	1.48	64.09	285	18	43	15	78	5.34	30.4	2.7	18	7	Validation Cohor	Non-postoperative group	Physical disease	Nonhypertension	Non-Diabetes	Non-Chronic cardiac insufficiency	Non-Chronic liver disease	Non-Chronic renal insufficiency
1010	male	75	4560.1				survival	3	9.6	0.06	234.74	634	7	13	19.1	571	33.41	36.8	0.5	18	7	Validation Cohor	Non-postoperative group	Physical disease	Nonhypertension	Non-Diabetes	Non-Chronic cardiac insufficiency	Non-Chronic liver disease	Chronic renal insufficiency
1011	female	66	2892.71	1191.04			survival	6	12.9	0.08	1.42	72	57	117	26.3	50	7.56	28	1	18	7	Validation Cohor	Non-postoperative group	Physical disease	Nonhypertension	Non-Diabetes	Non-Chronic cardiac insufficiency	Non-Chronic liver disease	Non-Chronic renal insufficiency
1012	male	50	1626.96	1649.03			survival	6	3.9	0.35	71.12	55	46	50	28.9	59	3.56	34.1	0.8	18	7	Validation Cohor	Non-postoperative group	Physical disease	Nonhypertension	Non-Diabetes	Non-Chronic cardiac insufficiency	Chronic liver disease	Non-Chronic renal insufficiency
1013	female	48	3205.38	2487.45			survival	4	14.8	6.84	30.37	1178	16	25	19.9	89	7.03	30.9	5.1	18	7	Validation Cohor	Non-postoperative group	Severe injury	Nonhypertension	Non-Diabetes	Non-Chronic cardiac insufficiency	Non-Chronic liver disease	Non-Chronic renal insufficiency
1014	male	66	2169.31	5087.34			survival	5	19	0.05	1.21	566	16	30	16.2	79	12.56	30.9	2	18	7	Validation Cohor	Non-postoperative group	Physical disease	Nonhypertension	Non-Diabetes	Non-Chronic cardiac insufficiency	Non-Chronic liver disease	Non-Chronic renal insufficiency
1015	male	33	3329.35				survival	3	7	0.15	2.03	15140	11	13	9.3	908	22.01	33.5	1.6	18	7	Validation Cohor	Non-postoperative group	Physical disease	Hypertension	Non-Diabetes	Chronic cardiac insufficiency	Non-Chronic liver disease	Chronic renal insufficiency
1016	male	58	3242.85				survival	2	9	0.13	96.94	305	16	40	18.3	34	12.56	36.1	0.9	18	7	Validation Cohor	Non-postoperative group	Physical disease	Nonhypertension	Non-Diabetes	Non-Chronic cardiac insufficiency	Non-Chronic liver disease	Non-Chronic renal insufficiency
1017	male	69	9556.83	4684.82			survival	4	39.4	107.63	218.67	12460	13	39	48.3	267	17.73	49.3	1.8	18	7	Validation Cohor	Non-postoperative group	Severe injury	Nonhypertension	Non-Diabetes	Non-Chronic cardiac insufficiency	Non-Chronic liver disease	Non-Chronic renal insufficiency
1018	female	58	16448.9				Death	4	0.2	78.82	190.14	25000	11	55	106	143	21.34	52.7	6.5	18	7	Validation Cohor	Non-postoperative group	Severe injury	Nonhypertension	Non-Diabetes	Non-Chronic cardiac insufficiency	Non-Chronic liver disease	Non-Chronic renal insufficiency
1019	male	64	10364.4				Death	2	4.7	4.84	33.08	1907	7	33	10.5	495	24.05	38.1	7.8	18	7	Validation Cohor	Non-postoperative group	Malignant tumor	Hypertension	Non-Diabetes	Non-Chronic cardiac insufficiency	Chronic liver disease	Chronic renal insufficiency
1020	female	72	4518.43				survival	5	9.3	0.55	18.89	25000	7	13	5.5	147	4.67	38.3	0.3	11	7	Validation Cohor	Non-postoperative group	Severe injury	Nonhypertension	Diabetes	Non-Chronic cardiac insufficiency	Non-Chronic liver disease	Chronic renal insufficiency
1021	male	59	12457.3				survival	5	5.1	0.93	138.85	1818	7	18	6	295	17.35	91.4	0.5	18	7	Validation Cohor	Non-postoperative group	Physical disease	Nonhypertension	Non-Diabetes	Non-Chronic cardiac insufficiency	Non-Chronic liver disease	Chronic renal insufficiency
1022	male	25	921.89				survival	2	7.6	0.05	43.67	15	18	20	16.4	71	6.1	34.4	0.8	18	7	Validation Cohor	Non-postoperative group	Severe injury	Nonhypertension	Non-Diabetes	Non-Chronic cardiac insufficiency	Non-Chronic liver disease	Non-Chronic renal insufficiency
1023	female	28	16448.9				survival	2	2	0.09	43.67	2757	46	108	11	58	3.39	25.3	1.9	18	7	Validation Cohor	Non-postoperative group	Physical disease	Nonhypertension	Non-Diabetes	Non-Chronic cardiac insufficiency	Non-Chronic liver disease	Non-Chronic renal insufficiency
1024	male	44	3523.49	7703.53			survival	4	5.3	0.12	251.63	691	7	16	13	164	20.55	38.1	3	18	7	Validation Cohor	Non-postoperative group	Severe injury	Nonhypertension	Diabetes	Non-Chronic cardiac insufficiency	Non-Chronic liver disease	Chronic renal insufficiency
1025	male	58	2494.78				survival	5	24.7	72.15	210.87	701	13	14	54.3	66	7.78	55.3	0.9	18	7	Validation Cohor	Non-postoperative group	Malignant tumor	Hypertension	Diabetes	Non-Chronic cardiac insufficiency	Non-Chronic liver disease	Non-Chronic renal insufficiency
1026	male	68	16448.9				Death	3	6.6	4.54	279.76	4005	7	26	15.1	164	14.76	31.7	3.9	21	14	Validation Cohor	Non-postoperative group	Physical disease	Nonhypertension	Non-Diabetes	Non-Chronic cardiac insufficiency	Non-Chronic liver disease	Chronic renal insufficiency
1027	male	54	1578.49				survival	2	10.4	0.05	1.64	172	25	33	15.9	135	7.53	22.5	0.9	18	7	Validation Cohor	Non-postoperative group	Physical disease	Hypertension	Non-Diabetes	Non-Chronic cardiac insufficiency	Non-Chronic liver disease	Chronic renal insufficiency
1028	male	35	825.76				survival	2	14	0.05	43.67	18	7	13	22.7	96	6	25.6	1.1	18	7	Validation Cohor	Non-postoperative group	Severe injury	Nonhypertension	Non-Diabetes	Non-Chronic cardiac insufficiency	Non-Chronic liver disease	Non-Chronic renal insufficiency
1029	female	27	2260.75				survival	4	5.3	0.17	17.81	9539	7	16	4.2	417	19.1	55.3	0.8	15	9	Validation Cohor	Non-postoperative group	Physical disease	Nonhypertension	Non-Diabetes	Chronic cardiac insufficiency	Non-Chronic liver disease	Chronic renal insufficiency
1030	male	33	3179.38	3407.29			survival	5	12.3	18.19	43.67	253	387	1920	16.6	333	13.83	30	0.7	8	7	Validation Cohor	Non-postoperative group	Physical disease	Nonhypertension	Non-Diabetes	Non-Chronic cardiac insufficiency	Chronic liver disease	Chronic renal insufficiency
1031	female	49	3423.34				survival	2	3.4	0.14	83.11	11826	7	13	3.2	372	12.56	56	0.4	18	7	Validation Cohor	Non-postoperative group	Physical disease	Hypertension	Diabetes	Non-Chronic cardiac insufficiency	Non-Chronic liver disease	Chronic renal insufficiency
1032	female	56	13688.1	7864.49			survival	5	19.4	0.35	74.46	1503	7	44	17.5	64	12.91	33.8	2	21	10	Validation Cohor	Non-postoperative group	Physical disease	Nonhypertension	Non-Diabetes	Non-Chronic cardiac insufficiency	Chronic liver disease	Non-Chronic renal insufficiency
1033	male	24	911.99				survival	3	8.4	0.22	194.82	35	8	18	27.5	51	2.68	39.6	0.5	18	7	Validation Cohor	Non-postoperative group	Physical disease	Nonhypertension	Diabetes	Non-Chronic cardiac insufficiency	Non-Chronic liver disease	Non-Chronic renal insufficiency
1034	female	84	9386.38				survival	4	27.5	22.18	282.29	2551	16	32	20.3	113	11.11	31.5	2	18	7	Validation Cohor	Non-postoperative group	Physical disease	Hypertension	Non-Diabetes	Non-Chronic cardiac insufficiency	Non-Chronic liver disease	Non-Chronic renal insufficiency
1035	female	73	4017.23	7635.7			survival	6	21.9	2.49	134.83	717	862	981	12.1	211	26.91	35.5	1.7	18	7	Validation Cohor	Non-postoperative group	Severe injury	Nonhypertension	Non-Diabetes	Non-Chronic cardiac insufficiency	Chronic liver disease	Chronic renal insufficiency
1036	male	57	7252.07	4977.49			Death	4	9	2.44	80	127	13	19	12.9	318	43.33	26.7	1.7	20	16	Validation Cohor	Non-postoperative group	Malignant tumor	Nonhypertension	Diabetes	Non-Chronic cardiac insufficiency	Non-Chronic liver disease	Chronic renal insufficiency
1037	female	57	1476.88				survival	3	5	19.34	43.67	3903.07	7	13	6.2	68	12.56	31.8	0.6	18	7	Validation Cohor	Non-postoperative group	Physical disease	Hypertension	Diabetes	Non-Chronic cardiac insufficiency	Non-Chronic liver disease	Non-Chronic renal insufficiency
1038	female	53	7018.47				survival	2	4.3	0.05	0.94	77	7	13	14	85	4.01	32.1	4.2	25	10	Validation Cohor	Non-postoperative group	Physical disease	Nonhypertension	Non-Diabetes	Non-Chronic cardiac insufficiency	Non-Chronic liver disease	Non-Chronic renal insufficiency
1039	male	27	5370.95	547.73			survival	4	14.7	1.65	43.67	57	9	13	33.7	61	8.89	41.7	1.3	23	1	Validation Cohor	Non-postoperative group	Physical disease	Nonhypertension	Non-Diabetes	Non-Chronic cardiac insufficiency	Non-Chronic liver disease	Non-Chronic renal insufficiency
1040	male	70	2791.67				survival	3	3.3	0.05	43.67	353	7	13	18.3	88	5.45	27.7	0.4	18	7	Validation Cohor	Non-postoperative group	Severe injury	Hypertension	Non-Diabetes	Non-Chronic cardiac insufficiency	Non-Chronic liver disease	Non-Chronic renal insufficiency
1041	male	58	4150.94				survival	3	9.2	0.4	43.67	16388	64.92	117.69	29.62	154.1	12.56	38.7	0.7	18	7	Validation Cohor	Non-postoperative group	Physical disease	Hypertension	Diabetes	Chronic cardiac insufficiency	Non-Chronic liver disease	Chronic renal insufficiency
1042	female	26	789.77				survival	3	7.7	0.05	3.75	104	7	16	9.6	44	3.39	31.5	0.6	18	7	Validation Cohor	Non-postoperative group	Other	Nonhypertension	Non-Diabetes	Non-Chronic cardiac insufficiency	Non-Chronic liver disease	Non-Chronic renal insufficiency
1043	male	66	2105.52				survival	3	6.4	1.09	66.44	25000	34	31	5.5	509	49.67	34.3	6.7	23	9	Validation Cohor	Non-postoperative group	Severe injury	Hypertension	Non-Diabetes	Chronic cardiac insufficiency	Non-Chronic liver disease	Chronic renal insufficiency
1044	female	49	5380.45	1286.43			survival	4	29.8	0.28	5.12	422	16	14	15.4	124	16.83	36	1.07	17	1	Validation Cohor	Non-postoperative group	Severe injury	Nonhypertension	Diabetes	Non-Chronic cardiac insufficiency	Non-Chronic liver disease	Non-Chronic renal insufficiency
1045	female	81	2131.86				survival	2	6.8	0.05	24.86	8533	64.92	117.69	29.62	154.1	12.56	38.7	0.5	18	7	Validation Cohor	Non-postoperative group	Physical disease	Hypertension	Non-Diabetes	Non-Chronic cardiac insufficiency	Non-Chronic liver disease	Non-Chronic renal insufficiency
1046	female	77	16448.9				Death	3	6.1	1.3	74.54	6484	7	21	10.9	447	55.88	40.3	4.26	29	14	Validation Cohor	Non-postoperative group	Physical disease	Hypertension	Diabetes	Chronic cardiac insufficiency	Non-Chronic liver disease	Chronic renal insufficiency
1047	male	53	2192.18				survival	2	17.9	0.16	2.29	1137	13	22	6.8	296	15.18	31	1.9	18	7	Validation Cohor	Non-postoperative group	Severe injury	Hypertension	Non-Diabetes	Non-Chronic cardiac insufficiency	Non-Chronic liver disease	Chronic renal insufficiency
1048	female	55	2338.29				survival	1	11.8	0.05	4.85	1033	37	27	9.5	81	6.34	35.6	3.6	18	7	Validation Cohor	Non-postoperative group	Severe injury	Hypertension	Non-Diabetes	Non-Chronic cardiac insufficiency	Non-Chronic liver disease	Non-Chronic renal insufficiency
1049	male	84	6295.6				survival	2	6.7	0.34	62.28	25000	7	27	7.4	409	16.71	31.6	2.1	25	10	Validation Cohor	Non-postoperative group	Severe injury	Hypertension	Diabetes	Non-Chronic cardiac insufficiency	Non-Chronic liver disease	Non-Chronic renal insufficiency
1050	male	60	3233.92	1822.8			survival	6	4.9	2.56	43.67	8400	10	45	34.9	154.1	12.56	32.3	1.8	8	6	Validation Cohor	Non-postoperative group	Malignant tumor	Nonhypertension	Non-Diabetes	Non-Chronic cardiac insufficiency	Non-Chronic liver disease	Non-Chronic renal insufficiency
1051	female	66	3473.49				survival	2	12.7	0.12	183.77	2944	21	31	115.8	34	11.19	32.9	1.3	17	10	Validation Cohor	Non-postoperative group	Physical disease	Nonhypertension	Non-Diabetes	Chronic cardiac insufficiency	Non-Chronic liver disease	Non-Chronic renal insufficiency
1052	male	63	3922.48				survival	2	2.7	0.14	1.64	39	43	58	15.6	107	8.17	31.8	1	18	7	Validation Cohor	Non-postoperative group	Severe injury	Nonhypertension	Non-Diabetes	Non-Chronic cardiac insufficiency	Chronic liver disease	Non-Chronic renal insufficiency
1053	female	67	7409.95	4600.32			survival	5	18.9	1.64	42.08	1000	44	50	26.9	286	30.24	24	1.6	18	7	Validation Cohor	Non-postoperative group	Physical disease	Nonhypertension	Diabetes	Non-Chronic cardiac insufficiency	Non-Chronic liver disease	Non-Chronic renal insufficiency
1054	male	70	3156.71	4612.46			survival	4	5.6	0.1	4.99	25000	7	20	10.8	756	35.41	112	0.5	18	7	Validation Cohor	Non-postoperative group	Physical disease	Nonhypertension	Non-Diabetes	Non-Chronic cardiac insufficiency	Non-Chronic liver disease	Chronic renal insufficiency
1055	male	73	2828.73	9461.22			survival	5	12.5	0.24	43.67	3485	22	30	18.6	154.1	12.56	38.7	3.5	18	7	Validation Cohor	Non-postoperative group	Physical disease	Hypertension	Non-Diabetes	Chronic cardiac insufficiency	Non-Chronic liver disease	Non-Chronic renal insufficiency
1056	male	65	6524.22	2110.51			survival	8	4.5	3.15	43.67	1552	121	293	10.8	70	3.33	80.5	0.9	18	7	Validation Cohor	Non-postoperative group	Physical disease	Nonhypertension	Non-Diabetes	Non-Chronic cardiac insufficiency	Non-Chronic liver disease	Non-Chronic renal insufficiency
1057	male	67	864.18	539.06			survival	6	6.6	0.18	85.17	851	7	16	6.3	50	2.17	38.2	1.4	18	7	Validation Cohor	Non-postoperative group	Severe injury	Nonhypertension	Diabetes	Non-Chronic cardiac insufficiency	Non-Chronic liver disease	Non-Chronic renal insufficiency
1058	female	74	16448.9	5574.23			Death	5	7.1	7.73	12.98	15175	7	28	15.3	184	12.56	45.4	2.1	18	7	Validation Cohor	Non-postoperative group	Severe injury	Hypertension	Non-Diabetes	Chronic cardiac insufficiency	Non-Chronic liver disease	Chronic renal insufficiency
1059	male	75	2623.81	1669.17			survival	4	25.2	2.99	12.89	241	7	15	27.2	125	12.56	34.9	2.2	18	7	Validation Cohor	Non-postoperative group	Physical disease	Nonhypertension	Non-Diabetes	Non-Chronic cardiac insufficiency	Non-Chronic liver disease	Non-Chronic renal insufficiency
1060	female	74	3493.93				survival	5	7.2	0.12	43.67	3392	7	15	5.1	102	9.49	28.3	1.3	18	7	Validation Cohor	Non-postoperative group	Physical disease	Hypertension	Diabetes	Non-Chronic cardiac insufficiency	Non-Chronic liver disease	Non-Chronic renal insufficiency
1061	male	47	813.47	1227.74			survival	7	12.1	0.34	43.67	138	11	22	7	204	9.2	31.1	0.9	18	7	Validation Cohor	Non-postoperative group	Physical disease	Hypertension	Non-Diabetes	Non-Chronic cardiac insufficiency	Non-Chronic liver disease	Non-Chronic renal insufficiency
1062	female	58	2067.86				survival	5	4.6	0.09	43.67	21967	7	31	10.3	449	16.55	33.2	1.3	18	7	Validation Cohor	Non-postoperative group	Severe injury	Hypertension	Non-Diabetes	Non-Chronic cardiac insufficiency	Non-Chronic liver disease	Chronic renal insufficiency
1063	female	71	820.52				survival	3	4.9	0.05	43.67	1067	7	13	14.5	56	4.45	38.7	0.7	18	7	Validation Cohor	Non-postoperative group	Physical disease	Nonhypertension	Non-Diabetes	Non-Chronic cardiac insufficiency	Non-Chronic liver disease	Non-Chronic renal insufficiency
1064	male	61	7285.86	2372.87			survival	7	8.5	0.05	3.36	159	7	35	12.8	134	5.43	45.9	0.8	13	8	Validation Cohor	Non-postoperative group	Physical disease	Hypertension	Non-Diabetes	Non-Chronic cardiac insufficiency	Non-Chronic liver disease	Non-Chronic renal insufficiency
1065	male	75	1706.39				survival	3	2.8	98.21	130.92	1471	179	136	128.4	89	5.37	38.6	1.4	18	7	Validation Cohor	Non-postoperative group	Physical disease	Nonhypertension	Non-Diabetes	Non-Chronic cardiac insufficiency	Non-Chronic liver disease	Non-Chronic renal insufficiency
1066	female	15	418.83	441.4			survival	5	9.3	0.05	92.06	15	7	13	14.6	43	2.8	180	0.9	14	7	Validation Cohor	Non-postoperative group	Physical disease	Nonhypertension	Non-Diabetes	Non-Chronic cardiac insufficiency	Non-Chronic liver disease	Non-Chronic renal insufficiency
1067	female	20	16448.9	4126.61			survival	5	10.5	8.15	128.38	1394	914	1860	7.9	103	5.16	30.1	0.6	18	8	Validation Cohor	Non-postoperative group	Physical disease	Nonhypertension	Diabetes	Non-Chronic cardiac insufficiency	Non-Chronic liver disease	Non-Chronic renal insufficiency
1068	female	58	16260.1				Death	2	17.1	0.26	13.01	23647	98	146	19.9	349	12.56	24.5	4	18	7	Validation Cohor	Non-postoperative group	Physical disease	Nonhypertension	Non-Diabetes	Chronic cardiac insufficiency	Non-Chronic liver disease	Chronic renal insufficiency
1069	male	70	3247.81				survival	2	11.2	0.1	21.22	1290	10	35	12.3	106	12.56	36.5	1.6	18	7	Validation Cohor	Non-postoperative group	Physical disease	Nonhypertension	Non-Diabetes	Non-Chronic cardiac insufficiency	Non-Chronic liver disease	Non-Chronic renal insufficiency
1070	female	25	3262.28				survival	2	14	0.05	1.04	131	15	36	12.2	55	12.56	31.2	2	18	7	Validation Cohor	Non-postoperative group	Physical disease	Nonhypertension	Non-Diabetes	Non-Chronic cardiac insufficiency	Non-Chronic liver disease	Non-Chronic renal insufficiency
1071	female	48	1722.06				survival	3	9.1	0.05	91.71	1935	13	31	4.8	65	4.79	38.2	0.8	18	7	Validation Cohor	Non-postoperative group	Other	Nonhypertension	Non-Diabetes	Non-Chronic cardiac insufficiency	Non-Chronic liver disease	Non-Chronic renal insufficiency
1072	male	32	1368.19	1277.31			survival	6	11.3	5.98	136.18	580	7	22	18.4	77	4.42	29.5	0.8	18	7	Validation Cohor	Non-postoperative group	Physical disease	Nonhypertension	Diabetes	Non-Chronic cardiac insufficiency	Non-Chronic liver disease	Chronic renal insufficiency
1073	male	33	1069.45				survival	2	6.6	0.05	43.67	15	43	26	18.9	80	4.32	40	1.4	18	7	Validation Cohor	Non-postoperative group	Other	Nonhypertension	Non-Diabetes	Non-Chronic cardiac insufficiency	Non-Chronic liver disease	Non-Chronic renal insufficiency
1074	male	58	6699.48	6356.3			survival	5	4.1	0.18	53.98	14945	7	15	13.5	105	5.04	45.4	1.11	18	7	Validation Cohor	Non-postoperative group	Physical disease	Nonhypertension	Diabetes	Chronic cardiac insufficiency	Non-Chronic liver disease	Chronic renal insufficiency
1075	male	79	3553.57				survival	3	7.4	0.71	32.36	1430	23	75	60.4	82	11.58	28.9	1.4	18	7	Validation Cohor	Non-postoperative group	Severe injury	Nonhypertension	Non-Diabetes	Non-Chronic cardiac insufficiency	Chronic liver disease	Non-Chronic renal insufficiency
1076	female	59	3174.11	1849.25			Death	5	14.9	0.18	3.65	735	44	52	51.2	122	28.64	36.3	1.1	28	9	Validation Cohor	Non-postoperative group	Physical disease	Nonhypertension	Non-Diabetes	Non-Chronic cardiac insufficiency	Chronic liver disease	Non-Chronic renal insufficiency
1077	male	53	3054.07	3756.74			survival	6	8.1	0.98	15.23	796	4092	3270	274.2	43	6.12	71.9	2.1	13	7	Validation Cohor	Non-postoperative group	Physical disease	Nonhypertension	Non-Diabetes	Chronic cardiac insufficiency	Chronic liver disease	Non-Chronic renal insufficiency
1078	male	47	3445.61				survival	2	12.73	2.65	43.67	1947	7	15	5.3	128	5.07	38.7	0.8	18	7	Validation Cohor	Non-postoperative group	Physical disease	Nonhypertension	Diabetes	Non-Chronic cardiac insufficiency	Non-Chronic liver disease	Non-Chronic renal insufficiency
1079	male	60	6730	5294.05			survival	6	8	35.96	65.91	25000	11	45	21.4	377	50.09	40.4	3.5	19	10	Validation Cohor	Non-postoperative group	Physical disease	Nonhypertension	Non-Diabetes	Chronic cardiac insufficiency	Non-Chronic liver disease	Chronic renal insufficiency
1080	male	88	4399.82				Death	5	9.3	0.91	7.66	3435	183	1023	163.2	270	17.82	41.9	1.6	18	7	Validation Cohor	Non-postoperative group	Physical disease	Nonhypertension	Non-Diabetes	Non-Chronic cardiac insufficiency	Non-Chronic liver disease	Non-Chronic renal insufficiency
1081	female	45	2314.07	5721.41			survival	4	17.5	1.06	123.43	25000	7	19	13.6	489	21.9	42.7	2.9	18	7	Validation Cohor	Non-postoperative group	Malignant tumor	Nonhypertension	Non-Diabetes	Chronic cardiac insufficiency	Non-Chronic liver disease	Chronic renal insufficiency
1082	female	80	2664.89	3422.9			survival	3	14	0.05	6.19	1262	7	17	11.6	97	7	32	1.1	18	7	Validation Cohor	Non-postoperative group	Other	Nonhypertension	Non-Diabetes	Non-Chronic cardiac insufficiency	Non-Chronic liver disease	Non-Chronic renal insufficiency
1083	male	58	1780.66				survival	3	7.3	0.05	43.67	27	7	13	14.5	81	6.96	30	0.8	18	7	Validation Cohor	Non-postoperative group	Severe injury	Nonhypertension	Non-Diabetes	Non-Chronic cardiac insufficiency	Non-Chronic liver disease	Non-Chronic renal insufficiency
1084	male	74	16448.9				Death	2	21.4	41.09	350.14	2841	419	2047	898.4	268	22.24	34.9	4.6	18	7	Validation Cohor	Non-postoperative group	Physical disease	Nonhypertension	Diabetes	Non-Chronic cardiac insufficiency	Non-Chronic liver disease	Non-Chronic renal insufficiency
1085	male	66	16448.9				Death	3	8.6	19.34	11.79	3903.07	30	107	18.2	66	1.85	29	1.7	18	7	Validation Cohor	Non-postoperative group	Severe injury	Nonhypertension	Non-Diabetes	Non-Chronic cardiac insufficiency	Non-Chronic liver disease	Non-Chronic renal insufficiency
1086	male	33	9427.63				survival	3	27.7	0.14	17.02	77	217	268	15.1	218	5.85	37.3	8.3	18	7	Validation Cohor	Non-postoperative group	Physical disease	Nonhypertension	Non-Diabetes	Non-Chronic cardiac insufficiency	Non-Chronic liver disease	Non-Chronic renal insufficiency
1087	female	62	761.74				survival	4	10.5	0.05	43.67	167	25	20	9.6	5.17	42	26.5	0.7	8	7	Validation Cohor	Non-postoperative group	Physical disease	Hypertension	Non-Diabetes	Non-Chronic cardiac insufficiency	Non-Chronic liver disease	Non-Chronic renal insufficiency
1088	female	69	1077.39	2623.56			survival	7	7.9	0.05	72.91	69	7	17	16.2	44	3.08	20.8	0.4	18	7	Validation Cohor	Non-postoperative group	Physical disease	Nonhypertension	Non-Diabetes	Non-Chronic cardiac insufficiency	Non-Chronic liver disease	Non-Chronic renal insufficiency
1089	female	71	7122.43	9861.13			survival	6	21.5	12.13	158.76	1413	7	33	14.8	74	8.26	32.5	1.3	18	7	Validation Cohor	Non-postoperative group	Physical disease	Hypertension	Diabetes	Chronic cardiac insufficiency	Non-Chronic liver disease	Non-Chronic renal insufficiency
1090	male	64	16448.9	16448.9			Death	2	3.8	19.34	89	3903.07	36	139	78.8	326	13.67	80.7	8.5	18	7	Validation Cohor	Non-postoperative group	Physical disease	Nonhypertension	Non-Diabetes	Non-Chronic cardiac insufficiency	Chronic liver disease	Non-Chronic renal insufficiency
1091	male	67	4032.91	2757.69			survival	6	5.8	0.05	1.13	10043	40	73	70.7	153	7.64	35.9	15	18	7	Validation Cohor	Non-postoperative group	Physical disease	Nonhypertension	Non-Diabetes	Non-Chronic cardiac insufficiency	Chronic liver disease	Chronic renal insufficiency
1092	female	18	2949.49	1897.25			survival	3	20.5	2.51	1.95	86	61	161	3.6	43	4.68	47.8	4	18	7	Validation Cohor	Non-postoperative group	Severe injury	Nonhypertension	Non-Diabetes	Non-Chronic cardiac insufficiency	Non-Chronic liver disease	Non-Chronic renal insufficiency
1093	female	62	756.99				survival	2	9.9	0.05	23.19	39	18	23	7.6	66	6.1	29.8	1	16	4	Validation Cohor	Non-postoperative group	Other	Nonhypertension	Non-Diabetes	Non-Chronic cardiac insufficiency	Non-Chronic liver disease	Non-Chronic renal insufficiency
1094	female	77	7807.38				survival	3	14.2	0.11	27.24	7401	23	17	6	175	15.76	28.1	1.6	18	7	Validation Cohor	Non-postoperative group	Physical disease	Nonhypertension	Non-Diabetes	Chronic cardiac insufficiency	Non-Chronic liver disease	Chronic renal insufficiency
1095	male	53	16448.9				Death	2	15.9	66.89	254.02	25000	108	246	56.7	518	21.58	180	15	18	7	Validation Cohor	Non-postoperative group	Physical disease	Hypertension	Diabetes	Non-Chronic cardiac insufficiency	Non-Chronic liver disease	Non-Chronic renal insufficiency
1096	male	61	3272.62				survival	3	3.9	0.05	13.06	85	32	45	6.7	61	5.13	25.4	1.2	18	7	Validation Cohor	Non-postoperative group	Physical disease	Nonhypertension	Non-Diabetes	Non-Chronic cardiac insufficiency	Non-Chronic liver disease	Non-Chronic renal insufficiency
1097	female	70	1241.78				survival	5	6	0.05	3.87	1135	43	30	19.4	51	1.7	34	0.8	27	8	Validation Cohor	Non-postoperative group	Physical disease	Hypertension	Non-Diabetes	Non-Chronic cardiac insufficiency	Non-Chronic liver disease	Non-Chronic renal insufficiency
1098	female	74	4920.84	4549.72			survival	6	24.5	0.15	96.47	3368	11	30	17.4	71	2.41	27.1	3.6	18	7	Validation Cohor	Non-postoperative group	Severe injury	Hypertension	Diabetes	Non-Chronic cardiac insufficiency	Non-Chronic liver disease	Non-Chronic renal insufficiency
1099	male	59	2056.79				survival	4	6.8	0.09	122.96	1374	7	13	6.3	80	7.11	38.4	0.7	18	10	Validation Cohor	Non-postoperative group	Physical disease	Hypertension	Non-Diabetes	Non-Chronic cardiac insufficiency	Non-Chronic liver disease	Non-Chronic renal insufficiency
1100	male	42	3526.17				survival	2	8.6	0.05	43.67	3903.07	15	14	7.2	77	5.36	34.7	1.4	18	7	Validation Cohor	Non-postoperative group	Other	Nonhypertension	Non-Diabetes	Non-Chronic cardiac insufficiency	Non-Chronic liver disease	Non-Chronic renal insufficiency
1101	female	66	8286.18	25031.6			survival	5	7.9	1.13	14.11	4534	29	22	4.3	293	63.26	34.8	1.1	18	7	Validation Cohor	Non-postoperative group	Malignant tumor	Nonhypertension	Non-Diabetes	Non-Chronic cardiac insufficiency	Non-Chronic liver disease	Non-Chronic renal insufficiency
1102	female	80	5602.41	13037.2			survival	5	9.4	0.05	18.64	2018	17	32	11.9	66	2.97	32.1	1.2	16	8	Validation Cohor	Non-postoperative group	Physical disease	Hypertension	Non-Diabetes	Non-Chronic cardiac insufficiency	Non-Chronic liver disease	Non-Chronic renal insufficiency
1103	male	69	9029.58	5546.67			Death	4	7.1	0.28	24.92	7235	7	21	7.1	76	4.35	31.5	0.8	18	7	Validation Cohor	Non-postoperative group	Malignant tumor	Nonhypertension	Non-Diabetes	Non-Chronic cardiac insufficiency	Non-Chronic liver disease	Non-Chronic renal insufficiency
1104	male	77	19568.9	4350.09			survival	5	3	0.84	11.09	25000	6	32	12.4	949	24.9	32.6	5.5	18	7	Validation Cohor	Non-postoperative group	Physical disease	Hypertension	Non-Diabetes	Chronic cardiac insufficiency	Non-Chronic liver disease	Chronic renal insufficiency
1105	male	25	12853	2536.98			survival	5	14.1	7.17	185.06	31	7	28	20	98	11.01	29.5	1.7	18	7	Validation Cohor	Non-postoperative group	Physical disease	Nonhypertension	Non-Diabetes	Non-Chronic cardiac insufficiency	Non-Chronic liver disease	Non-Chronic renal insufficiency
1106	male	52	4987.65				survival	1	12.3	0.05	43.67	45	31	23	41.4	97	5.25	30.4	2	18	7	Validation Cohor	Non-postoperative group	Other	Nonhypertension	Non-Diabetes	Non-Chronic cardiac insufficiency	Non-Chronic liver disease	Non-Chronic renal insufficiency
1107	female	33	2582.85	2402.49			survival	4	14.2	20.7	210.75	77	7	27	18.8	175	12.69	34	1.2	18	7	Validation Cohor	Non-postoperative group	Physical disease	Nonhypertension	Non-Diabetes	Non-Chronic cardiac insufficiency	Non-Chronic liver disease	Non-Chronic renal insufficiency
1108	male	60	3227.82				survival	2	2.7	45.15	124.19	25000	99	130	33.3	366	20.88	48	1.9	18	7	Validation Cohor	Non-postoperative group	Physical disease	Hypertension	Non-Diabetes	Chronic cardiac insufficiency	Chronic liver disease	Chronic renal insufficiency
1109	female	45	2388.93				survival	1	5.6	0.05	4.04	4508	7	25	6.9	238	11.63	34.5	0.3	18	7	Validation Cohor	Non-postoperative group	Physical disease	Hypertension	Diabetes	Chronic cardiac insufficiency	Non-Chronic liver disease	Chronic renal insufficiency
1110	male	77	5559.6				Death	2	62.9	200	101.09	25000	11	67	37.3	74	8.19	33.1	1.5	18	7	Validation Cohor	Non-postoperative group	Malignant tumor	Nonhypertension	Non-Diabetes	Non-Chronic cardiac insufficiency	Non-Chronic liver disease	Non-Chronic renal insufficiency
1111	male	72	2429.49	3687.6			Death	5	9.5	0.79	82.54	25000	28	64	10.2	497	31.65	30.7	0.5	27	7	Validation Cohor	Non-postoperative group	Physical disease	Hypertension	Diabetes	Chronic cardiac insufficiency	Non-Chronic liver disease	Chronic renal insufficiency
1112	female	46	1480.17				survival	1	4.3	0.05	43.67	321	8	16	25.9	56	3.32	30.9	0.5	18	7	Validation Cohor	Non-postoperative group	Malignant tumor	Nonhypertension	Non-Diabetes	Chronic cardiac insufficiency	Non-Chronic liver disease	Non-Chronic renal insufficiency
1113	female	60	2662.23				survival	2	10.2	2.05	43.67	2333	13	16	24.2	63	4.9	36.7	0.7	17	7	Validation Cohor	Non-postoperative group	Physical disease	Nonhypertension	Non-Diabetes	Non-Chronic cardiac insufficiency	Non-Chronic liver disease	Non-Chronic renal insufficiency
1114	male	30	877.56				survival	1	11.8	0.05	43.67	28	42	23	15.7	114	10.17	38.7	2	18	7	Validation Cohor	Non-postoperative group	Physical disease	Nonhypertension	Non-Diabetes	Non-Chronic cardiac insufficiency	Non-Chronic liver disease	Chronic renal insufficiency
1115	male	87	7006.23				survival	2	5.2	0.65	102	510	39	65	7.6	181	28	35.5	1.4	18	7	Validation Cohor	Non-postoperative group	Physical disease	Nonhypertension	Non-Diabetes	Non-Chronic cardiac insufficiency	Non-Chronic liver disease	Chronic renal insufficiency
1116	male	46	20000	5948.34			survival	4	12.2	0.71	22.23	19676	7	13	4.4	973	49	28.1	0.7	20	5	Validation Cohor	Non-postoperative group	Severe injury	Nonhypertension	Non-Diabetes	Non-Chronic cardiac insufficiency	Non-Chronic liver disease	Non-Chronic renal insufficiency
1117	male	42	2348.01				survival	2	9.2	0.56	218.84	370	64	89	40.4	63	6.73	28.1	1.7	18	7	Validation Cohor	Non-postoperative group	Physical disease	Nonhypertension	Non-Diabetes	Non-Chronic cardiac insufficiency	Non-Chronic liver disease	Non-Chronic renal insufficiency
1118	male	76	20000				survival	3	14.7	1.51	50.73	22552	461	828	8.1	872	24.43	29.9	0.7	18	7	Validation Cohor	Non-postoperative group	Physical disease	Nonhypertension	Non-Diabetes	Non-Chronic cardiac insufficiency	Non-Chronic liver disease	Chronic renal insufficiency
1119	female	78	3012.06				Death	3	6.9	2.44	99.01	2341	7	26	19.6	115	9.04	41.6	1.5	25	12	Validation Cohor	Non-postoperative group	Physical disease	Nonhypertension	Non-Diabetes	Chronic cardiac insufficiency	Non-Chronic liver disease	Chronic renal insufficiency
1120	male	56	1982.28	2195.01			survival	6	10.3	0.22	1.33	358	34	30	5.1	71	11	31.1	0.7	15	3	Validation Cohor	Non-postoperative group	Physical disease	Hypertension	Non-Diabetes	Non-Chronic cardiac insufficiency	Non-Chronic liver disease	Non-Chronic renal insufficiency
1121	male	34	1306.83	901.23			survival	5	13.3	0.05	43.67	1717	21	273	24.4	82	3.27	25.9	0.8	18	7	Validation Cohor	Non-postoperative group	Physical disease	Nonhypertension	Non-Diabetes	Non-Chronic cardiac insufficiency	Non-Chronic liver disease	Non-Chronic renal insufficiency
1122	male	78	2123.55				survival	2	9.9	0.15	43.67	25000	59	59	11.4	232	15.9	50.4	0.5	18	7	Validation Cohor	Non-postoperative group	Physical disease	Hypertension	Diabetes	Non-Chronic cardiac insufficiency	Non-Chronic liver disease	Non-Chronic renal insufficiency
1123	female	78	2566.74	2363.82			survival	6	8.6	0.87	115.63	1622	20	45	57.4	53	9.62	31.8	1	15	6	Validation Cohor	Non-postoperative group	Physical disease	Nonhypertension	Non-Diabetes	Non-Chronic cardiac insufficiency	Non-Chronic liver disease	Non-Chronic renal insufficiency
1124	female	77	2531.79	2359.56			survival	7	6.3	70.7	14.25	0.86	17	62	11.3	64	8.31	28.9	2.3	17	9	Validation Cohor	Non-postoperative group	Physical disease	Hypertension	Non-Diabetes	Non-Chronic cardiac insufficiency	Non-Chronic liver disease	Non-Chronic renal insufficiency
1125	male	62	3048.78	12955.3			survival	3	21.5	2.61	32.91	4922	9	18	32.3	130	23.23	56.1	1.2	18	7	Validation Cohor	Non-postoperative group	Physical disease	Nonhypertension	Non-Diabetes	Chronic cardiac insufficiency	Non-Chronic liver disease	Chronic renal insufficiency
1126	female	49	767.91				survival	2	16.8	0.05	18.05	222	10	16	2.7	53	5.09	33.3	1.9	18	4	Validation Cohor	Non-postoperative group	Physical disease	Nonhypertension	Non-Diabetes	Non-Chronic cardiac insufficiency	Non-Chronic liver disease	Non-Chronic renal insufficiency
1127	female	58	5643.72				survival	1	7.3	0.14	55.25	20142	28	37	10.9	143	9.58	29.4	1.9	13	7	Validation Cohor	Non-postoperative group	Physical disease	Nonhypertension	Diabetes	Chronic cardiac insufficiency	Non-Chronic liver disease	Chronic renal insufficiency
1128	male	63	5459.79	9297.12			Death	3	31.5	14.47	293.3	710	7	13	8.7	130	15.63	40.7	2.1	17	4	Validation Cohor	Non-postoperative group	Physical disease	Hypertension	Non-Diabetes	Non-Chronic cardiac insufficiency	Non-Chronic liver disease	Chronic renal insufficiency
1129	female	79	5975.7	2646.81			survival	14	30.1	4.03	5.16	24288	25	72	5	632	56.71	87.1	2.8	21	8	Validation Cohor	Non-postoperative group	Physical disease	Nonhypertension	Diabetes	Chronic cardiac insufficiency	Non-Chronic liver disease	Chronic renal insufficiency
1130	male	70	4743.99	6705.03			Death	4	10.7	0.52	74.95	6850	14	28	7.6	189	15.57	26.3	0.5	22	12	Validation Cohor	Non-postoperative group	Physical disease	Nonhypertension	Non-Diabetes	Non-Chronic cardiac insufficiency	Non-Chronic liver disease	Chronic renal insufficiency
1131	male	62	5532.96				survival	2	6	0.37	31.94	300	24	36	27.7	70	8.88	40.5	0.6	18	7	Validation Cohor	Non-postoperative group	Severe injury	Nonhypertension	Non-Diabetes	Non-Chronic cardiac insufficiency	Chronic liver disease	Non-Chronic renal insufficiency
1132	male	44	2422.71	2257.92			survival	11	25.2	0.86	159.06	86	15	37	49	92	5.36	25.4	0.9	12	5	Validation Cohor	Non-postoperative group	Physical disease	Nonhypertension	Diabetes	Non-Chronic cardiac insufficiency	Non-Chronic liver disease	Non-Chronic renal insufficiency
1133	male	55	7159.86	2848.95			survival	7	20.2	44.37	152	21868	12	17	7.3	510	12.56	34.8	1.1	18	4	Validation Cohor	Non-postoperative group	Physical disease	Hypertension	Diabetes	Non-Chronic cardiac insufficiency	Non-Chronic liver disease	Chronic renal insufficiency
1134	female	55	1724.22				survival	1	15.2	0.05	43.67	207	64.92	117.69	29.62	154.1	12.56	26.4	1.5	18	7	Validation Cohor	Non-postoperative group	Physical disease	Hypertension	Non-Diabetes	Non-Chronic cardiac insufficiency	Non-Chronic liver disease	Non-Chronic renal insufficiency
1135	female	75	14248.7				Death	5	6.1	0.54	16.16	5952	7	16	85.6	610	34.41	37.5	0.7	18	7	Validation Cohor	Non-postoperative group	Severe injury	Hypertension	Diabetes	Chronic cardiac insufficiency	Non-Chronic liver disease	Chronic renal insufficiency
1136	male	61	4428.45	2654.16			survival	4	17.3	0.2	20.57	166	7	17	18.8	133	9.31	28.8	1.17	18	7	Validation Cohor	Non-postoperative group	Severe injury	Nonhypertension	Non-Diabetes	Non-Chronic cardiac insufficiency	Non-Chronic liver disease	Non-Chronic renal insufficiency
1137	female	39	2473.44	20000			Death	6	14.2	0.06	34.4	472	38	91	83.9	60	5.35	29.9	1.5	26	11	Validation Cohor	Non-postoperative group	Physical disease	Nonhypertension	Non-Diabetes	Non-Chronic cardiac insufficiency	Chronic liver disease	Non-Chronic renal insufficiency
1138	female	49	2272.44				survival	8	17.5	0.05	20.57	27	7	13	16.6	48	4.24	26.8	1	15	8	Validation Cohor	Non-postoperative group	Physical disease	Hypertension	Diabetes	Non-Chronic cardiac insufficiency	Non-Chronic liver disease	Non-Chronic renal insufficiency
1139	male	61	2423.94				survival	4	6.9	1.75	28.84	25000	7	15	11	1074	47.96	46.4	0.7	20	4	Validation Cohor	Non-postoperative group	Physical disease	Nonhypertension	Non-Diabetes	Non-Chronic cardiac insufficiency	Non-Chronic liver disease	Chronic renal insufficiency
1140	female	71	2407.92				survival	1	7.8	0.05	39.07	1981	17	38	10.4	66	4.21	41.3	1	18	7	Validation Cohor	Non-postoperative group	Physical disease	Nonhypertension	Non-Diabetes	Non-Chronic cardiac insufficiency	Non-Chronic liver disease	Non-Chronic renal insufficiency
1141	male	67	4349.19				Death	10	18.1	0.05	90.39	1.36	7	14	9.3	57	5.83	34.4	1.3	18	12	Validation Cohor	Non-postoperative group	Physical disease	Nonhypertension	Non-Diabetes	Non-Chronic cardiac insufficiency	Non-Chronic liver disease	Non-Chronic renal insufficiency
1142	female	72	5439.03				survival	4	22.5	0.13	34.49	25000	23	28	15	129	24.55	31.7	1	18	7	Validation Cohor	Non-postoperative group	Physical disease	Nonhypertension	Diabetes	Chronic cardiac insufficiency	Non-Chronic liver disease	Chronic renal insufficiency
1143	female	59	2346.45				survival	4	6.6	0.48	61.83	183	82	42	16.8	48	6.51	28.8	0.8	18	7	Validation Cohor	Non-postoperative group	Physical disease	Nonhypertension	Non-Diabetes	Non-Chronic cardiac insufficiency	Non-Chronic liver disease	Non-Chronic renal insufficiency
1144	female	68	7028.49				survival	4	6.9	0.51	31.45	1827	7	19	6.3	87	12.56	13.3	2	14	5	Validation Cohor	Non-postoperative group	Physical disease	Hypertension	Diabetes	Non-Chronic cardiac insufficiency	Non-Chronic liver disease	Non-Chronic renal insufficiency
1145	male	65	2691.12	3223.41			survival	5	13.4	6.79	275.54	1108	8	33	17.8	163	20.54	29.8	1.4	18	7	Validation Cohor	Non-postoperative group	Physical disease	Hypertension	Diabetes	Non-Chronic cardiac insufficiency	Non-Chronic liver disease	Non-Chronic renal insufficiency
1146	male	58	3089.94	2571.39			Death	6	23.6	200	234.74	1889	215	251	86	103	12.56	35.7	2.1	18	7	Validation Cohor	Non-postoperative group	Physical disease	Nonhypertension	Non-Diabetes	Non-Chronic cardiac insufficiency	Non-Chronic liver disease	Non-Chronic renal insufficiency
1147	female	44	5548.14	6004.35			survival	4	9.9	33.09	308.24	1348	201	795	74.4	210	7.19	40.9	3.2	18	7	Validation Cohor	Non-postoperative group	Physical disease	Nonhypertension	Diabetes	Non-Chronic cardiac insufficiency	Chronic liver disease	Chronic renal insufficiency
1148	male	51	2552.94				survival	2	11.2	0.2	109.02	1053	7	9	17.2	60	12.56	35.4	0.9	18	7	Validation Cohor	Non-postoperative group	Physical disease	Nonhypertension	Diabetes	Non-Chronic cardiac insufficiency	Non-Chronic liver disease	Non-Chronic renal insufficiency
1149	female	32	6314.55	5694.9			survival	6	14.5	2.27	43.67	148	7	24	12.4	108	4.99	33.3	0.62	18	8	Validation Cohor	Non-postoperative group	Physical disease	Nonhypertension	Diabetes	Non-Chronic cardiac insufficiency	Non-Chronic liver disease	Non-Chronic renal insufficiency
1150	male	55	2625.51	3520.71			survival	7	11.8	2.38	221.92	13297	12	69	11.9	841	16.58	31	0.6	18	7	Validation Cohor	Non-postoperative group	Physical disease	Nonhypertension	Non-Diabetes	Chronic cardiac insufficiency	Non-Chronic liver disease	Chronic renal insufficiency
1151	female	59	2418.54				survival	2	5.9	0.05	43.67	2555	7	25	14.8	60	6.47	33.8	1.1	18	7	Validation Cohor	Non-postoperative group	Physical disease	Hypertension	Non-Diabetes	Non-Chronic cardiac insufficiency	Non-Chronic liver disease	Non-Chronic renal insufficiency
1152	male	31	20000				Death	2	11.4	0.63	100.88	11513	148	355	26.6	333	22.3	35.2	1.2	18	7	Validation Cohor	Non-postoperative group	Severe injury	Nonhypertension	Non-Diabetes	Chronic cardiac insufficiency	Non-Chronic liver disease	Chronic renal insufficiency
1153	male	55	2291.64	5815.05			Death	6	89.8	2.35	80	11500	7	23	13.7	126	18.63	22.7	2.09	20	7	Validation Cohor	Non-postoperative group	Physical disease	Nonhypertension	Non-Diabetes	Non-Chronic cardiac insufficiency	Non-Chronic liver disease	Non-Chronic renal insufficiency
1154	female	55	2504.19	2677.23			survival	7	7.9	1.81	43.67	2232	33	91	24.3	91	8.75	47.6	4	25	7	Validation Cohor	Non-postoperative group	Severe injury	Nonhypertension	Non-Diabetes	Non-Chronic cardiac insufficiency	Chronic liver disease	Chronic renal insufficiency
1155	female	57	5827.11	6779.67			Death	8	2.3	3.2	25.39	25000	41	77	29	292	17.27	33.3	2.1	37	16	Validation Cohor	Non-postoperative group	Physical disease	Hypertension	Non-Diabetes	Non-Chronic cardiac insufficiency	Non-Chronic liver disease	Chronic renal insufficiency
1156	male	63	5502.75				survival	2	8.3	2.68	97.88	11628	154	213	12	484	24.87	64.9	0.9	18	7	Validation Cohor	Non-postoperative group	Physical disease	Hypertension	Non-Diabetes	Chronic cardiac insufficiency	Non-Chronic liver disease	Chronic renal insufficiency
1157	female	84	2414.97				survival	1	18.3	0.14	112.44	1634	7	30	15.6	66	6.33	180	0.7	18	7	Validation Cohor	Non-postoperative group	Physical disease	Hypertension	Diabetes	Non-Chronic cardiac insufficiency	Non-Chronic liver disease	Chronic renal insufficiency
1158	male	74	2475.21				survival	4	15.7	1.09	46.14	8560	31	21	15	119	9.95	28.9	1.9	20	9	Validation Cohor	Non-postoperative group	Physical disease	Hypertension	Diabetes	Chronic cardiac insufficiency	Non-Chronic liver disease	Non-Chronic renal insufficiency
1159	female	49	5621.79				survival	2	8	1.92	104.07	25000	24	106	38.5	77	12.56	61.5	4	18	7	Validation Cohor	Non-postoperative group	Physical disease	Nonhypertension	Non-Diabetes	Non-Chronic cardiac insufficiency	Chronic liver disease	Chronic renal insufficiency
1160	male	57	2914.23				survival	2	15.7	0.05	42.83	427	11	20	5.4	82	12.56	27	1.8	18	7	Validation Cohor	Non-postoperative group	Other	Nonhypertension	Non-Diabetes	Non-Chronic cardiac insufficiency	Non-Chronic liver disease	Non-Chronic renal insufficiency
1161	female	74	6695.52				survival	3	18.6	0.2	60.23	10666	13	83	6	146	9.93	30.7	1.7	18	7	Validation Cohor	Non-postoperative group	Severe injury	Hypertension	Non-Diabetes	Chronic cardiac insufficiency	Non-Chronic liver disease	Non-Chronic renal insufficiency
1162	male	62	2611.2				survival	2	13.4	0.05	2.04	45	7	13	7.4	115	10.27	31	2.4	18	7	Validation Cohor	Non-postoperative group	Severe injury	Nonhypertension	Non-Diabetes	Non-Chronic cardiac insufficiency	Non-Chronic liver disease	Non-Chronic renal insufficiency
1163	male	73	13882.2				Death	4	8.2	0.56	80	9141	38	191	23.5	132	19.43	35.1	5.7	18	7	Validation Cohor	Non-postoperative group	Malignant tumor	Nonhypertension	Non-Diabetes	Non-Chronic cardiac insufficiency	Chronic liver disease	Chronic renal insufficiency
1164	male	64	2976.69	3701.13			survival	4	10.3	0.31	4.88	865	22	30	6.2	278	15.58	42.1	1.5	15	5	Validation Cohor	Non-postoperative group	Physical disease	Hypertension	Non-Diabetes	Non-Chronic cardiac insufficiency	Non-Chronic liver disease	Chronic renal insufficiency
1165	female	64	4194.72	10513.1			Death	6	7.1	2.29	271.57	3119	29	25	21.2	200	18.02	45	1.4	28	15	Validation Cohor	Non-postoperative group	Malignant tumor	Hypertension	Non-Diabetes	Non-Chronic cardiac insufficiency	Non-Chronic liver disease	Non-Chronic renal insufficiency
1166	female	46	2895.42				survival	4	15.7	0.25	2.07	77	7	27	5	105	18.38	31.1	0.7	11	2	Validation Cohor	Non-postoperative group	Physical disease	Nonhypertension	Diabetes	Non-Chronic cardiac insufficiency	Non-Chronic liver disease	Chronic renal insufficiency
1167	female	61	4969.14				survival	2	3.5	37.68	43.67	6089	8	37	13.6	151	23.13	40.8	2.7	18	7	Validation Cohor	Non-postoperative group	Physical disease	Nonhypertension	Non-Diabetes	Non-Chronic cardiac insufficiency	Non-Chronic liver disease	Non-Chronic renal insufficiency
1168	female	59	10384.6	7090.8			survival	8	9.1	0.23	12.59	608	14	51	18.8	75	5.32	27.2	1.6	20	8	Validation Cohor	Non-postoperative group	Physical disease	Nonhypertension	Diabetes	Chronic cardiac insufficiency	Non-Chronic liver disease	Non-Chronic renal insufficiency
1169	male	71	5433.78	25215.8			Death	4	8	189.2	252.11	1665	31	56	18.4	490	50.97	47.7	1.2	18	7	Validation Cohor	Non-postoperative group	Physical disease	Nonhypertension	Non-Diabetes	Non-Chronic cardiac insufficiency	Non-Chronic liver disease	Chronic renal insufficiency
1170	female	51	804.84				survival	2	9.3	0.05	1.98	54	7	13	9.3	79	3.22	30.8	5.7	18	7	Validation Cohor	Non-postoperative group	Malignant tumor	Nonhypertension	Non-Diabetes	Non-Chronic cardiac insufficiency	Non-Chronic liver disease	Non-Chronic renal insufficiency
1171	male	48	6859.95	10787.9			Death	4	13.5	45.96	80	925	24	102	52.4	158	15.76	30.7	1.8	18	7	Validation Cohor	Non-postoperative group	Physical disease	Nonhypertension	Non-Diabetes	Non-Chronic cardiac insufficiency	Non-Chronic liver disease	Non-Chronic renal insufficiency
1172	male	36	5530.47				survival	2	12.6	0.05	8.67	716	12	59	42.8	80	12.56	32.1	2.2	18	4	Validation Cohor	Non-postoperative group	Physical disease	Nonhypertension	Non-Diabetes	Non-Chronic cardiac insufficiency	Non-Chronic liver disease	Chronic renal insufficiency
1173	male	74	20790.7				Death	2	10.3	1.75	24.17	14245	195	249	92.5	157	14.85	36.1	5.8	18	5	Validation Cohor	Non-postoperative group	Physical disease	Nonhypertension	Diabetes	Chronic cardiac insufficiency	Chronic liver disease	Non-Chronic renal insufficiency
1174	male	66	12229.9	6616.23			survival	7	11.6	0.89	153.17	1974	21	13	18.9	76	3.62	48.7	0.57	14	6	Validation Cohor	Non-postoperative group	Severe injury	Nonhypertension	Non-Diabetes	Non-Chronic cardiac insufficiency	Chronic liver disease	Non-Chronic renal insufficiency
1175	male	72	3055.56				survival	2	12.6	0.16	49.75	373	7	13	12.7	99	12.39	33.1	0.7	18	7	Validation Cohor	Non-postoperative group	Malignant tumor	Nonhypertension	Non-Diabetes	Non-Chronic cardiac insufficiency	Non-Chronic liver disease	Non-Chronic renal insufficiency
1176	male	24	3928.77				survival	3	9.6	14.64	34.29	127	150	85	17.9	51	5.13	35.5	0.8	17	4	Validation Cohor	Non-postoperative group	Severe injury	Nonhypertension	Non-Diabetes	Non-Chronic cardiac insufficiency	Non-Chronic liver disease	Non-Chronic renal insufficiency
1177	female	69	9169.11				survival	3	14.8	0.05	1.45	159	93	79	6.7	71	12.56	30.6	3.3	14	4	Validation Cohor	Non-postoperative group	Physical disease	Nonhypertension	Non-Diabetes	Non-Chronic cardiac insufficiency	Non-Chronic liver disease	Non-Chronic renal insufficiency
1178	male	61	5686.86				survival	4	11.9	0.46	54.55	165	57	37	17	79	6.63	32.9	1.5	9	8	Validation Cohor	Non-postoperative group	Physical disease	Hypertension	Non-Diabetes	Non-Chronic cardiac insufficiency	Non-Chronic liver disease	Non-Chronic renal insufficiency
1179	female	57	1767.6				Death	2	19.6	0.05	28.3	32	13	24	10.8	77	5.4	32.1	1.3	24	7	Validation Cohor	Non-postoperative group	Physical disease	Nonhypertension	Diabetes	Non-Chronic cardiac insufficiency	Non-Chronic liver disease	Chronic renal insufficiency
1180	male	50	9268.62	10845.9			survival	3	11.3	0.76	13.21	8292	7	13	5.7	843	23.07	29.7	0.8	18	7	Validation Cohor	Non-postoperative group	Malignant tumor	Nonhypertension	Non-Diabetes	Non-Chronic cardiac insufficiency	Non-Chronic liver disease	Chronic renal insufficiency
1181	male	47	6608.82	13650.4			survival	6	2.7	6.56	12.55	25000	18	105	232	68	2.24	39.4	1	16	7	Validation Cohor	Non-postoperative group	Physical disease	Nonhypertension	Non-Diabetes	Chronic cardiac insufficiency	Chronic liver disease	Non-Chronic renal insufficiency
1182	female	78	6552.84	6841.44			survival	10	25.9	0.05	8.77	139	65	42	26.8	119	13.1	27.6	1.6	18	7	Validation Cohor	Non-postoperative group	Physical disease	Nonhypertension	Non-Diabetes	Non-Chronic cardiac insufficiency	Non-Chronic liver disease	Non-Chronic renal insufficiency
1183	male	59	7305.48	5633.73			survival	5	12.1	0.51	249.64	578	7	43	30.2	96	4.84	35.2	0.91	18	7	Validation Cohor	Non-postoperative group	Physical disease	Hypertension	Diabetes	Non-Chronic cardiac insufficiency	Non-Chronic liver disease	Non-Chronic renal insufficiency
1184	male	54	10479.6				survival	3	12	0.05	0.5	21	64	31	45.4	99	12.56	34.7	3.1	9	2	Validation Cohor	Non-postoperative group	Physical disease	Hypertension	Diabetes	Chronic cardiac insufficiency	Non-Chronic liver disease	Non-Chronic renal insufficiency
1185	male	71	5321.07	4071.21			survival	4	8.9	0.05	12.69	9207	11	36	19.5	84	5.72	34.3	2.2	18	7	Validation Cohor	Non-postoperative group	Physical disease	Hypertension	Diabetes	Chronic cardiac insufficiency	Non-Chronic liver disease	Non-Chronic renal insufficiency
1186	female	57	8408.52	7787.22			survival	5	43.3	11.09	43.67	254	26	32	11.8	214	15.7	42.6	6.3	14	3	Validation Cohor	Non-postoperative group	Physical disease	Nonhypertension	Diabetes	Non-Chronic cardiac insufficiency	Non-Chronic liver disease	Non-Chronic renal insufficiency
1187	male	80	7553.61	10710.8			survival	8	17	3.94	130.48	23554	9	34	40.1	198	25.11	39	1.7	27	1	Validation Cohor	Non-postoperative group	Physical disease	Nonhypertension	Diabetes	Chronic cardiac insufficiency	Non-Chronic liver disease	Non-Chronic renal insufficiency
1188	female	76	8089.14				survival	4	22.5	0.09	18.16	2329	22	153	5.9	82	7	29	2.2	18	9	Validation Cohor	Non-postoperative group	Physical disease	Nonhypertension	Non-Diabetes	Non-Chronic cardiac insufficiency	Non-Chronic liver disease	Non-Chronic renal insufficiency
1189	male	61	19640.8				Death	3	10.3	75.5	131.65	1085	12	67	58	110	5.9	52.5	3.2	18	12	Validation Cohor	Non-postoperative group	Physical disease	Nonhypertension	Non-Diabetes	Non-Chronic cardiac insufficiency	Non-Chronic liver disease	Non-Chronic renal insufficiency
1190	female	68	13518.5				Death	4	8.7	0.32	18.7	205	19	50	7.8	103	8.63	25.2	1.4	18	7	Validation Cohor	Non-postoperative group	Physical disease	Nonhypertension	Diabetes	Non-Chronic cardiac insufficiency	Non-Chronic liver disease	Non-Chronic renal insufficiency
1191	male	37	12446.9	3808.02			Death	7	7.2	0.16	17.39	2788	7	62	93.2	110	9.53	40.5	0.8	11	13	Validation Cohor	Non-postoperative group	Physical disease	Nonhypertension	Non-Diabetes	Non-Chronic cardiac insufficiency	Chronic liver disease	Chronic renal insufficiency
1192	female	30	11584.4				survival	5	15.9	0.16	39.36	25000	7	16	8.6	263	12.56	27	1.2	17	6	Validation Cohor	Non-postoperative group	Physical disease	Nonhypertension	Non-Diabetes	Chronic cardiac insufficiency	Non-Chronic liver disease	Chronic renal insufficiency
1193	female	73	6802.11				survival	2	12.3	0.16	43.67	25000	8	23	18.1	296	9.51	118	1.9	18	7	Validation Cohor	Non-postoperative group	Physical disease	Nonhypertension	Non-Diabetes	Non-Chronic cardiac insufficiency	Non-Chronic liver disease	Chronic renal insufficiency
1194	male	63	5376.48				survival	6	7	0.07	43.67	1875	12	32	39.2	52	7.48	61.6	0.9	18	4	Validation Cohor	Non-postoperative group	Physical disease	Nonhypertension	Non-Diabetes	Non-Chronic cardiac insufficiency	Non-Chronic liver disease	Non-Chronic renal insufficiency
1195	male	67	4566.9				survival	3	4.2	0.05	43.67	410	10	13	6.4	97	5.85	32.6	0.9	18	7	Validation Cohor	Non-postoperative group	Physical disease	Nonhypertension	Non-Diabetes	Non-Chronic cardiac insufficiency	Non-Chronic liver disease	Non-Chronic renal insufficiency
1196	female	67	48528	18099.7			Death	5	13	0.25	39.89	22168	330	636	28.4	277	6.99	46	4	38	7	Validation Cohor	Non-postoperative group	Physical disease	Hypertension	Non-Diabetes	Chronic cardiac insufficiency	Non-Chronic liver disease	Chronic renal insufficiency
1197	male	18	2402.1				survival	3	8.3	0.15	6.72	132	7	14	8.6	70	4.52	29.3	0.9	18	7	Validation Cohor	Non-postoperative group	Physical disease	Nonhypertension	Diabetes	Non-Chronic cardiac insufficiency	Non-Chronic liver disease	Chronic renal insufficiency
1198	female	61	11270.5	53208			survival	7	15.3	0.31	14.31	2247	27	222	31.6	68	4.88	50.7	3	14	6	Validation Cohor	Non-postoperative group	Physical disease	Nonhypertension	Non-Diabetes	Non-Chronic cardiac insufficiency	Non-Chronic liver disease	Non-Chronic renal insufficiency
1199	male	70	7152.63	9108.63			Death	8	11.1	3.34	107.14	8498	474	228	35.5	130	7.95	40.1	0.7	16	12	Validation Cohor	Non-postoperative group	Physical disease	Nonhypertension	Non-Diabetes	Non-Chronic cardiac insufficiency	Non-Chronic liver disease	Non-Chronic renal insufficiency
1200	male	44	21462.8				Death	4	10.1	11.59	80	159	3108	8730	56	330	15.28	77.2	2.1	25	14	Validation Cohor	Non-postoperative group	Physical disease	Nonhypertension	Diabetes	Non-Chronic cardiac insufficiency	Chronic liver disease	Chronic renal insufficiency
1201	female	39	5684.28	13194.3			survival	4	4.6	0.16	19.19	32	154	146	421.2	67	1.73	180	1.1	18	7	Validation Cohor	Non-postoperative group	Physical disease	Nonhypertension	Non-Diabetes	Non-Chronic cardiac insufficiency	Non-Chronic liver disease	Non-Chronic renal insufficiency
1202	male	40	7238.7	7015.71			survival	4	8.9	46.44	43.89	8545	81	200	8.9	1183	24.45	34.2	1.8	23	9	Validation Cohor	Non-postoperative group	Physical disease	Hypertension	Non-Diabetes	Chronic cardiac insufficiency	Non-Chronic liver disease	Chronic renal insufficiency
1203	male	72	18572.8	18234.7			survival	4	6.3	0.11	43.67	1574	23	106	76.4	98	7.8	32.5	1.7	26	7	Validation Cohor	Non-postoperative group	Physical disease	Hypertension	Diabetes	Non-Chronic cardiac insufficiency	Chronic liver disease	Non-Chronic renal insufficiency
1204	male	18	2351.49	2232.36			survival	5	14.1	2.93	12.72	217	7	29	6.7	80	7.55	41.5	0.7	18	7	Validation Cohor	Non-postoperative group	Physical disease	Nonhypertension	Non-Diabetes	Non-Chronic cardiac insufficiency	Non-Chronic liver disease	Non-Chronic renal insufficiency
1205	male	71	8707.32	15920.2			survival	3	18.1	0.87	30.93	420	7	13	6.8	58	6.19	34.6	0.7	18	7	Validation Cohor	Non-postoperative group	Severe injury	Nonhypertension	Non-Diabetes	Non-Chronic cardiac insufficiency	Non-Chronic liver disease	Non-Chronic renal insufficiency
1206	female	28	7358.4	13203.1			survival	7	9.4	45.34	32.05	2420	267	105	62.3	410	19.77	28.7	0.6	18	7	Validation Cohor	Non-postoperative group	Physical disease	Nonhypertension	Non-Diabetes	Non-Chronic cardiac insufficiency	Chronic liver disease	Chronic renal insufficiency
1207	male	64	5374.47				survival	2	13.5	0.09	11.22	1056	11	34	19.8	84	4.58	31	1.4	21	3	Validation Cohor	Non-postoperative group	Physical disease	Nonhypertension	Non-Diabetes	Non-Chronic cardiac insufficiency	Non-Chronic liver disease	Non-Chronic renal insufficiency
1208	male	71	22621.5	8161.35			survival	6	12	16.91	33.42	4046	37	33	18.7	74	8.28	38.5	2.5	11	4	Validation Cohor	Non-postoperative group	Physical disease	Nonhypertension	Diabetes	Chronic cardiac insufficiency	Non-Chronic liver disease	Non-Chronic renal insufficiency
1209	male	57	19430.1				survival	2	4	200	183.79	6084	9	53	15.8	173	17.06	44.8	6.2	19	8	Validation Cohor	Non-postoperative group	Physical disease	Nonhypertension	Diabetes	Non-Chronic cardiac insufficiency	Non-Chronic liver disease	Chronic renal insufficiency
1210	female	61	3874.35	6812.7			survival	7	8.5	0.05	36.51	15	18	37	10.3	69	7.24	33.5	0.7	10	4	Validation Cohor	Non-postoperative group	Physical disease	Nonhypertension	Non-Diabetes	Non-Chronic cardiac insufficiency	Non-Chronic liver disease	Non-Chronic renal insufficiency
1211	male	41	8497.11				survival	2	10.5	18.51	259.94	3732	7	23	33.6	615	18.34	51.4	2	18	7	Validation Cohor	Non-postoperative group	Physical disease	Nonhypertension	Non-Diabetes	Chronic cardiac insufficiency	Chronic liver disease	Chronic renal insufficiency
1212	male	57	2926.17	2954.85			survival	3	11.6	0.14	83.21	37	7	25	30.1	65	9.55	27.4	0.9	18	7	Validation Cohor	Non-postoperative group	Severe injury	Nonhypertension	Non-Diabetes	Non-Chronic cardiac insufficiency	Non-Chronic liver disease	Non-Chronic renal insufficiency
1213	male	15	1221.81				survival	2	6.9	0.05	0.5	48	13	13	22.8	57	4.12	42.1	0.8	18	7	Validation Cohor	Non-postoperative group	Other	Nonhypertension	Non-Diabetes	Non-Chronic cardiac insufficiency	Non-Chronic liver disease	Non-Chronic renal insufficiency
1214	male	65	7401.48	16043.5			survival	4	7.8	0.37	87.64	3545	49	57	35.1	85	10.68	32.1	1.5	18	7	Validation Cohor	Non-postoperative group	Physical disease	Nonhypertension	Non-Diabetes	Non-Chronic cardiac insufficiency	Non-Chronic liver disease	Non-Chronic renal insufficiency
1215	male	70	8435.19				survival	2	11.9	0.05	0.5	84	51	45	17.8	70	12.56	34.2	2.2	18	7	Validation Cohor	Non-postoperative group	Physical disease	Hypertension	Non-Diabetes	Chronic cardiac insufficiency	Non-Chronic liver disease	Non-Chronic renal insufficiency
1216	male	60	11278.8				Death	3	13.6	0.77	11.43	2129	7	22	21.2	155	14.27	31.8	1.7	18	7	Validation Cohor	Non-postoperative group	Physical disease	Nonhypertension	Non-Diabetes	Chronic cardiac insufficiency	Non-Chronic liver disease	Non-Chronic renal insufficiency
1217	male	52	16526.2	5998.59			Death	6	8.6	3.57	27.23	193	20	99	124.5	108	10.76	70.6	1.5	20	11	Validation Cohor	Non-postoperative group	Severe injury	Nonhypertension	Non-Diabetes	Non-Chronic cardiac insufficiency	Chronic liver disease	Chronic renal insufficiency
1218	male	45	7119.45	7062.39			Death	5	19.5	0.12	74.03	1318	7	14	34.6	35	2.29	38.5	2.1	21	13	Validation Cohor	Non-postoperative group	Physical disease	Nonhypertension	Non-Diabetes	Non-Chronic cardiac insufficiency	Non-Chronic liver disease	Non-Chronic renal insufficiency
1219	female	65	7276.89				survival	2	6.5	4.5	43.73	172	7	16	12.4	69	7.67	44.2	1.3	18	7	Validation Cohor	Non-postoperative group	Physical disease	Hypertension	Diabetes	Non-Chronic cardiac insufficiency	Non-Chronic liver disease	Non-Chronic renal insufficiency
1220	female	28	4791.75				survival	1	13	6.53	36.51	441	87	16	26.8	244	7.61	27.2	0.5	18	7	Validation Cohor	Non-postoperative group	Physical disease	Nonhypertension	Non-Diabetes	Non-Chronic cardiac insufficiency	Chronic liver disease	Chronic renal insufficiency
1221	male	42	4961.25				survival	1	2.3	0.12	4.09	22	586	416	474.7	38	2.79	103.1	0.36	18	7	Validation Cohor	Non-postoperative group	Other	Nonhypertension	Non-Diabetes	Non-Chronic cardiac insufficiency	Non-Chronic liver disease	Non-Chronic renal insufficiency
1222	female	82	11087.5				Death	2	8.8	0.12	23.6	23908	7	108	21.7	92	8.69	34.9	1.4	18	13	Validation Cohor	Non-postoperative group	Physical disease	Nonhypertension	Non-Diabetes	Chronic cardiac insufficiency	Non-Chronic liver disease	Non-Chronic renal insufficiency
1223	male	72	4076.61				survival	3	8.4	0.05	48.48	358	11	18	12	50	5.23	36.2	1	18	7	Validation Cohor	Non-postoperative group	Physical disease	Nonhypertension	Non-Diabetes	Non-Chronic cardiac insufficiency	Non-Chronic liver disease	Non-Chronic renal insufficiency
1224	female	75	9166.62	6858.72			survival	4	3.8	0.8	25.45	1687	7	13	10.9	258	18.62	49.5	1.2	18	7	Validation Cohor	Non-postoperative group	Severe injury	Nonhypertension	Non-Diabetes	Chronic cardiac insufficiency	Non-Chronic liver disease	Chronic renal insufficiency
1225	female	63	4246.68	5575.38			survival	4	13.1	0.05	0.98	33	46	55	18.6	72	12.56	44.4	4.2	18	7	Validation Cohor	Non-postoperative group	Physical disease	Hypertension	Non-Diabetes	Chronic cardiac insufficiency	Non-Chronic liver disease	Non-Chronic renal insufficiency
1226	female	68	7141.62	5788.95			survival	4	12.3	0.23	21.25	1508	23	25	20.2	97	29.08	36.3	1.5	20	10	Validation Cohor	Non-postoperative group	Physical disease	Nonhypertension	Non-Diabetes	Non-Chronic cardiac insufficiency	Non-Chronic liver disease	Non-Chronic renal insufficiency
1227	male	39	3309.12	7604.97			Death	3	10.8	0.05	2.28	182	18	28	6	96	5.37	28.4	1.7	26	8	Validation Cohor	Non-postoperative group	Severe injury	Hypertension	Non-Diabetes	Non-Chronic cardiac insufficiency	Non-Chronic liver disease	Non-Chronic renal insufficiency
1228	female	47	7138.26	6302.13			survival	6	23.9	36.24	178.67	25000	7	14	10.9	171	10.21	27.2	1	18	6	Validation Cohor	Non-postoperative group	Physical disease	Nonhypertension	Diabetes	Chronic cardiac insufficiency	Non-Chronic liver disease	Chronic renal insufficiency
1229	male	62	21266.3				Death	2	10.5	1.99	29.08	15	1938	4460	26.4	616	35.86	37.6	7.8	18	7	Validation Cohor	Non-postoperative group	Physical disease	Nonhypertension	Diabetes	Chronic cardiac insufficiency	Non-Chronic liver disease	Chronic renal insufficiency
1230	female	71	4744.65	4900.8			survival	5	5.4	0.05	51.05	15	7	42	11.8	136	7.41	37.6	0.9	12	3	Validation Cohor	Non-postoperative group	Physical disease	Hypertension	Diabetes	Chronic cardiac insufficiency	Non-Chronic liver disease	Non-Chronic renal insufficiency
1231	male	76	8420.16				survival	3	7.7	21.6	302.7	2761	23	50	7.8	432	24.3	64.9	1.2	16	2	Validation Cohor	Non-postoperative group	Physical disease	Nonhypertension	Non-Diabetes	Non-Chronic cardiac insufficiency	Non-Chronic liver disease	Chronic renal insufficiency
1232	female	70	6038.01				survival	2	10.4	0.05	28.37	1892	11	81	17.7	207	6.88	29.9	1.7	26	4	Validation Cohor	Non-postoperative group	Other	Hypertension	Non-Diabetes	Non-Chronic cardiac insufficiency	Non-Chronic liver disease	Non-Chronic renal insufficiency
1233	male	56	10385.8				Death	5	9.2	1.75	70.72	3289	7	26	31.8	147	11.19	33.5	1.8	21	7	Validation Cohor	Non-postoperative group	Physical disease	Nonhypertension	Diabetes	Non-Chronic cardiac insufficiency	Non-Chronic liver disease	Non-Chronic renal insufficiency
1234	female	81	5836.17				survival	2	2.9	0.47	3.19	270	7	20	21.9	40	4.94	35.4	1.9	20	3	Validation Cohor	Non-postoperative group	Severe injury	Nonhypertension	Non-Diabetes	Non-Chronic cardiac insufficiency	Chronic liver disease	Non-Chronic renal insufficiency
1235	female	62	3717.87				survival	5	11.4	0.05	43.67	703	12	15	16.2	79	8.07	29.5	2	15	3	Validation Cohor	Non-postoperative group	Physical disease	Nonhypertension	Non-Diabetes	Non-Chronic cardiac insufficiency	Non-Chronic liver disease	Non-Chronic renal insufficiency
1236	male	43	4477.08				survival	2	22.7	0.67	47.07	255	31	38	24.1	94	12.99	38.5	1.8	18	7	Validation Cohor	Non-postoperative group	Malignant tumor	Hypertension	Non-Diabetes	Non-Chronic cardiac insufficiency	Non-Chronic liver disease	Chronic renal insufficiency
1237	female	33	4286.49				survival	3	2.8	0.05	0.66	521	7	13	9.2	807	28	30.7	1	23	5	Validation Cohor	Non-postoperative group	Physical disease	Nonhypertension	Non-Diabetes	Non-Chronic cardiac insufficiency	Non-Chronic liver disease	Chronic renal insufficiency
1238	female	26	4612.02				survival	2	7.7	0.21	3.43	10049	7	13	5.3	866	20.65	31.2	0.7	18	7	Validation Cohor	Non-postoperative group	Physical disease	Hypertension	Non-Diabetes	Non-Chronic cardiac insufficiency	Non-Chronic liver disease	Chronic renal insufficiency
1239	male	46	8800.47				survival	2	9.8	0.15	93.82	109	7	29	5.5	53	5.48	29.4	0.8	18	7	Validation Cohor	Non-postoperative group	Physical disease	Nonhypertension	Non-Diabetes	Non-Chronic cardiac insufficiency	Non-Chronic liver disease	Non-Chronic renal insufficiency
1240	male	57	24238.1				Death	3	16.6	3.33	58.55	873	28	104	18.3	222	12.55	29.8	2.4	18	7	Validation Cohor	Non-postoperative group	Physical disease	Hypertension	Non-Diabetes	Chronic cardiac insufficiency	Non-Chronic liver disease	Non-Chronic renal insufficiency
1241	male	60	16413.2	5186.52			Death	4	13	7.03	11.06	533	9	80	40.2	119	7.45	45.2	3.5	18	7	Validation Cohor	Non-postoperative group	Physical disease	Nonhypertension	Non-Diabetes	Non-Chronic cardiac insufficiency	Non-Chronic liver disease	Non-Chronic renal insufficiency
1242	male	62	9898.59	10335.5			survival	8	21.7	6.41	5.82	2023	23	31	19.6	133	8.57	31.5	2	11	10	Validation Cohor	Non-postoperative group	Physical disease	Nonhypertension	Non-Diabetes	Non-Chronic cardiac insufficiency	Non-Chronic liver disease	Non-Chronic renal insufficiency
1243	female	69	14658.7				Death	3	11.4	5.46	80	25000	21	57	32.7	133	8.18	28.4	1.5	18	7	Validation Cohor	Non-postoperative group	Physical disease	Nonhypertension	Non-Diabetes	Chronic cardiac insufficiency	Non-Chronic liver disease	Chronic renal insufficiency
1244	female	72	16171.6				Death	3	14.9	200	248	17203	11	38	7.9	387	29.69	30.7	3.2	18	7	Validation Cohor	Non-postoperative group	Physical disease	Hypertension	Diabetes	Non-Chronic cardiac insufficiency	Non-Chronic liver disease	Non-Chronic renal insufficiency
1245	male	65	8165.1				survival	2	13.6	0.05	3.32	367	7	16	12	65	6.74	141.1	0.8	15	4	Validation Cohor	Non-postoperative group	Severe injury	Nonhypertension	Diabetes	Non-Chronic cardiac insufficiency	Non-Chronic liver disease	Non-Chronic renal insufficiency
1246	male	55	22087.8				survival	3	13.9	0.35	13.19	3294	49	293	465.8	383	22.57	75.3	1.5	18	10	Validation Cohor	Non-postoperative group	Severe injury	Nonhypertension	Non-Diabetes	Non-Chronic cardiac insufficiency	Chronic liver disease	Chronic renal insufficiency
1247	female	72	11113.8	9319.29			survival	8	16.2	1.94	84.38	1162	7	28	7.3	74	5.54	53.2	1.6	12	5	Validation Cohor	Non-postoperative group	Physical disease	Hypertension	Diabetes	Non-Chronic cardiac insufficiency	Non-Chronic liver disease	Non-Chronic renal insufficiency
1248	male	65	9394.71				survival	3	24.7	0.43	13.51	866	48	40	15.3	122	9.55	34.5	1.7	18	7	Validation Cohor	Non-postoperative group	Physical disease	Hypertension	Diabetes	Chronic cardiac insufficiency	Non-Chronic liver disease	Non-Chronic renal insufficiency
1249	male	78	7989.33				survival	1	8.6	0.05	43.67	3534	10	42	18.8	92	4.89	43.6	1.4	21	10	Validation Cohor	Non-postoperative group	Physical disease	Nonhypertension	Non-Diabetes	Chronic cardiac insufficiency	Non-Chronic liver disease	Non-Chronic renal insufficiency
1250	male	78	7596.81				Death	4	9	138.17	254.4	25000	27	97	98.8	327	26.53	90.6	2.5	27	14	Validation Cohor	Non-postoperative group	Physical disease	Nonhypertension	Non-Diabetes	Non-Chronic cardiac insufficiency	Chronic liver disease	Chronic renal insufficiency
1251	male	70	13536.1				Death	2	21.6	81.2	80	3750	9	45	9.9	188	14.98	37.5	2.1	30	14	Validation Cohor	Non-postoperative group	Physical disease	Nonhypertension	Diabetes	Non-Chronic cardiac insufficiency	Non-Chronic liver disease	Non-Chronic renal insufficiency
1252	male	33	1679.07				survival	2	10.9	19.34	43.67	3903.07	13	14	8.4	50	3.38	33	2	18	7	Validation Cohor	Non-postoperative group	Physical disease	Nonhypertension	Non-Diabetes	Non-Chronic cardiac insufficiency	Non-Chronic liver disease	Non-Chronic renal insufficiency
1253	male	69	7394.37	11363.8			survival	7	10.1	0.48	43.67	433	10	28	12.5	101	14.45	33.7	0.7	16	4	Validation Cohor	Non-postoperative group	Physical disease	Nonhypertension	Non-Diabetes	Non-Chronic cardiac insufficiency	Non-Chronic liver disease	Non-Chronic renal insufficiency
1254	male	68	7787.91	6874.71			survival	4	4.7	1.46	79.53	1203	7	18	12.1	90	10.6	39.7	0.9	23	7	Validation Cohor	Non-postoperative group	Physical disease	Nonhypertension	Non-Diabetes	Non-Chronic cardiac insufficiency	Non-Chronic liver disease	Non-Chronic renal insufficiency
1255	male	63	11024.6				Death	3	17.6	2.32	307.85	7027	17	31	14.4	129	13.26	37.7	1.4	18	7	Validation Cohor	Non-postoperative group	Physical disease	Nonhypertension	Non-Diabetes	Non-Chronic cardiac insufficiency	Non-Chronic liver disease	Chronic renal insufficiency
1256	male	53	5478.81				survival	5	15.9	0.07	2.24	245	24	136	20.4	54	0.58	28.9	1.3	22	6	Validation Cohor	Non-postoperative group	Physical disease	Hypertension	Non-Diabetes	Non-Chronic cardiac insufficiency	Chronic liver disease	Non-Chronic renal insufficiency
1257	female	68	57287.4				Death	2	25.5	5.98	195.4	22283	356	605	60.1	239	25.42	23.5	5.6	25	15	Validation Cohor	Non-postoperative group	Physical disease	Nonhypertension	Non-Diabetes	Non-Chronic cardiac insufficiency	Non-Chronic liver disease	Non-Chronic renal insufficiency
1258	female	59	5724.84	6304.23			survival	9	6.9	0.3	24.91	146	7	28	5.6	34	5.46	180	1.1	19	6	Validation Cohor	Non-postoperative group	Physical disease	Hypertension	Non-Diabetes	Chronic cardiac insufficiency	Non-Chronic liver disease	Non-Chronic renal insufficiency
1259	male	80	19070.6				Death	5	15.7	32.01	183.7	21767	24	85	13	225	8.18	55.4	1	21	13	Validation Cohor	Non-postoperative group	Physical disease	Hypertension	Non-Diabetes	Chronic cardiac insufficiency	Non-Chronic liver disease	Chronic renal insufficiency
1260	male	47	6602.01	6815.1			survival	6	11.5	0.45	42.87	1421	503	529	21.9	240	12.43	77.6	1	14	4	Validation Cohor	Non-postoperative group	Severe injury	Hypertension	Non-Diabetes	Non-Chronic cardiac insufficiency	Non-Chronic liver disease	Non-Chronic renal insufficiency
1261	male	20	4999.62				survival	4	12.2	0.3	130.94	205	7	13	19.6	91	3.23	31.5	0.8	20	1	Validation Cohor	Non-postoperative group	Physical disease	Nonhypertension	Diabetes	Non-Chronic cardiac insufficiency	Non-Chronic liver disease	Non-Chronic renal insufficiency
1262	female	68	15661.2	17790.5			Death	4	9.3	0.42	201.48	5113	10	35	13.5	325	20.3	36.8	5.7	14	1	Validation Cohor	Non-postoperative group	Physical disease	Nonhypertension	Non-Diabetes	Chronic cardiac insufficiency	Non-Chronic liver disease	Chronic renal insufficiency
1263	male	50	22298.4				Death	3	10.1	42.9	80	4341	101	820	21.5	238	20.63	36.6	2	18	5	Validation Cohor	Non-postoperative group	Physical disease	Nonhypertension	Diabetes	Non-Chronic cardiac insufficiency	Non-Chronic liver disease	Non-Chronic renal insufficiency
1264	male	57	9479.91				survival	3	10.5	0.06	11.4	174	15	48	16.3	66	4.46	31.5	1	18	7	Validation Cohor	Non-postoperative group	Severe injury	Hypertension	Non-Diabetes	Non-Chronic cardiac insufficiency	Non-Chronic liver disease	Non-Chronic renal insufficiency
1265	female	72	11976				Death	4	9	22.62	196.6	1647	10	35	20	139	12.56	32.4	1.4	18	7	Validation Cohor	Non-postoperative group	Physical disease	Hypertension	Diabetes	Non-Chronic cardiac insufficiency	Non-Chronic liver disease	Non-Chronic renal insufficiency
1266	male	50	9580.08	6499.08			Death	5	7.8	6.13	78.57	3039	7	63	9	100	11.89	36.9	1.58	29	14	Validation Cohor	Non-postoperative group	Physical disease	Nonhypertension	Diabetes	Non-Chronic cardiac insufficiency	Non-Chronic liver disease	Non-Chronic renal insufficiency
1267	female	40	12372.5	5778.33			Death	5	7.1	8.28	277.36	732	7	15	13.1	231	14.54	35.6	1.5	27	11	Validation Cohor	Non-postoperative group	Physical disease	Nonhypertension	Non-Diabetes	Non-Chronic cardiac insufficiency	Non-Chronic liver disease	Chronic renal insufficiency
1268	female	69	8423.76				Death	4	23.2	200	80	2530	15	42	30.4	300	15.19	33.9	1.5	29	11	Validation Cohor	Non-postoperative group	Physical disease	Hypertension	Non-Diabetes	Non-Chronic cardiac insufficiency	Non-Chronic liver disease	Chronic renal insufficiency
1269	female	57	5726.94				survival	2	7.4	0.05	3.05	776	19	22	10.2	86	12.56	28.5	1.9	18	7	Validation Cohor	Non-postoperative group	Physical disease	Hypertension	Non-Diabetes	Chronic cardiac insufficiency	Non-Chronic liver disease	Non-Chronic renal insufficiency
1270	male	50	14257.9	9045.99			Death	8	11.4	6.37	49.2	7364	8	39	30.8	129	5.17	32.9	0.9	33	15	Validation Cohor	Non-postoperative group	Physical disease	Nonhypertension	Non-Diabetes	Chronic cardiac insufficiency	Non-Chronic liver disease	Chronic renal insufficiency
1271	male	76	28520.9	17783.7			Death	4	9.6	5.34	67.73	22030	7	17	9.3	336	53.29	82.6	2.3	38	16	Validation Cohor	Non-postoperative group	Physical disease	Hypertension	Diabetes	Non-Chronic cardiac insufficiency	Non-Chronic liver disease	Chronic renal insufficiency
1272	male	53	5494.2				survival	1	7.7	0.17	2.72	40	71	128	23.7	120	4.27	34.4	1.6	18	7	Validation Cohor	Non-postoperative group	Severe injury	Nonhypertension	Non-Diabetes	Non-Chronic cardiac insufficiency	Chronic liver disease	Non-Chronic renal insufficiency
1273	female	72	6994.11				survival	2	11	0.19	87.41	3149	16	23	21.1	46	1.58	33	0.6	20	5	Validation Cohor	Non-postoperative group	Malignant tumor	Nonhypertension	Non-Diabetes	Chronic cardiac insufficiency	Non-Chronic liver disease	Non-Chronic renal insufficiency
1274	female	20	5719.35				survival	4	7.7	0.31	35.12	640	7	13	7.8	77	7.07	28.3	0.5	23	5	Validation Cohor	Non-postoperative group	Physical disease	Nonhypertension	Diabetes	Non-Chronic cardiac insufficiency	Non-Chronic liver disease	Non-Chronic renal insufficiency
1275	female	73	9386.76				survival	2	8.8	0.08	126.6	163	33	48	9.4	96	8.35	33.4	0.6	18	7	Validation Cohor	Non-postoperative group	Physical disease	Hypertension	Non-Diabetes	Non-Chronic cardiac insufficiency	Non-Chronic liver disease	Non-Chronic renal insufficiency
1276	female	42	7811.37				survival	3	21	0.06	43.67	22	7	35	30	55	12.56	29	2.9	16	9	Validation Cohor	Non-postoperative group	Physical disease	Nonhypertension	Non-Diabetes	Non-Chronic cardiac insufficiency	Non-Chronic liver disease	Non-Chronic renal insufficiency
1277	male	62	3323.67				survival	3	20.8	0.05	82.01	40	39	35	13.9	82	7.42	107.1	1.4	13	4	Validation Cohor	Non-postoperative group	Physical disease	Hypertension	Diabetes	Chronic cardiac insufficiency	Non-Chronic liver disease	Non-Chronic renal insufficiency
1278	female	52	18915				Death	2	0.2	192.46	80	145	64.92	117.69	29.62	154.1	12.56	41.4	9.4	18	7	Validation Cohor	Non-postoperative group	Malignant tumor	Nonhypertension	Non-Diabetes	Non-Chronic cardiac insufficiency	Chronic liver disease	Non-Chronic renal insufficiency
1279	female	55	4229.34	3722.97			survival	5	9.9	5.82	43.67	105	31	33	41.4	66	9.83	26.8	0.6	18	7	Validation Cohor	Non-postoperative group	Postoperative	Nonhypertension	Non-Diabetes	Non-Chronic cardiac insufficiency	Non-Chronic liver disease	Non-Chronic renal insufficiency
1280	female	64	6449.73	9627.69			survival	2	8.5	0.08	15.06	11583	251	393	26.7	99	5.33	40.1	1.3	11	10	Validation Cohor	Non-postoperative group	Physical disease	Nonhypertension	Non-Diabetes	Chronic cardiac insufficiency	Non-Chronic liver disease	Non-Chronic renal insufficiency
1281	male	65	3340.5				Death	5	8.5	0.06	87.4	987	26	52	18.4	101	10.29	26.6	0.9	20	7	Validation Cohor	Non-postoperative group	Severe injury	Hypertension	Diabetes	Non-Chronic cardiac insufficiency	Non-Chronic liver disease	Non-Chronic renal insufficiency
1282	female	64	4374.09				survival	3	4.9	114.12	29.83	0.47	7	23	8.1	408	21.83	28.6	0.8	23	7	Validation Cohor	Non-postoperative group	Severe injury	Hypertension	Diabetes	Non-Chronic cardiac insufficiency	Non-Chronic liver disease	Chronic renal insufficiency
1283	male	70	3280.32				survival	2	8.1	141	105.97	0.63	16	31	7.4	70	4.11	30.8	0.5	29	6	Validation Cohor	Non-postoperative group	Severe injury	Hypertension	Non-Diabetes	Non-Chronic cardiac insufficiency	Non-Chronic liver disease	Non-Chronic renal insufficiency
1284	male	69	8259.15	6597.45			survival	5	18.3	0.05	51.94	44	9	14	16.5	47	12.56	38.6	3.1	16	5	Validation Cohor	Non-postoperative group	Physical disease	Nonhypertension	Diabetes	Non-Chronic cardiac insufficiency	Non-Chronic liver disease	Non-Chronic renal insufficiency
1285	female	63	8385.15				survival	2	6.6	2.27	54.25	1725	13	47	8.4	126	17.99	27.2	2.6	18	7	Validation Cohor	Non-postoperative group	Physical disease	Hypertension	Diabetes	Non-Chronic cardiac insufficiency	Chronic liver disease	Chronic renal insufficiency
1286	male	58	7934.7				survival	3	9.8	0.05	3.59	3709	7	18	7.3	84	9.65	32.3	0.9	19	4	Validation Cohor	Non-postoperative group	Severe injury	Nonhypertension	Non-Diabetes	Chronic cardiac insufficiency	Non-Chronic liver disease	Non-Chronic renal insufficiency
1287	male	65	12920.9	10320.2			Death	4	3.6	73.19	285	4961	32	69	66.4	382	19.15	31.3	2.3	25	18	Validation Cohor	Non-postoperative group	Physical disease	Nonhypertension	Non-Diabetes	Non-Chronic cardiac insufficiency	Non-Chronic liver disease	Chronic renal insufficiency
1288	male	61	7471.74				survival	2	7.9	0.07	17.36	5786	12	14	19.3	94	7.65	28.1	1	11	4	Validation Cohor	Non-postoperative group	Malignant tumor	Hypertension	Diabetes	Non-Chronic cardiac insufficiency	Non-Chronic liver disease	Non-Chronic renal insufficiency
1289	male	58	12273.1				Death	3	4.7	0.3	19.26	55	15	74	32.6	72	10.86	31.5	2.7	18	7	Validation Cohor	Non-postoperative group	Severe injury	Nonhypertension	Non-Diabetes	Non-Chronic cardiac insufficiency	Chronic liver disease	Non-Chronic renal insufficiency
1290	male	83	7085.34				survival	3	4.1	0.11	25.15	945	7	23	17	880	35.3	29.8	0.9	28	0	Validation Cohor	Non-postoperative group	Malignant tumor	Nonhypertension	Non-Diabetes	Non-Chronic cardiac insufficiency	Non-Chronic liver disease	Chronic renal insufficiency
1291	male	69	6525.48				survival	3	17	0.05	48.59	15	38	32	10.4	95	6.56	32.3	1.2	14	3	Validation Cohor	Non-postoperative group	Physical disease	Nonhypertension	Non-Diabetes	Chronic cardiac insufficiency	Non-Chronic liver disease	Non-Chronic renal insufficiency
1292	male	69	10295.9	17998.7			Death	7	15.6	0.05	10.01	4521	7	13	27.4	167	9.59	39.8	0.7	30	13	Validation Cohor	Non-postoperative group	Malignant tumor	Hypertension	Diabetes	Chronic cardiac insufficiency	Non-Chronic liver disease	Chronic renal insufficiency
1293	female	65	9411.39	11625.4			survival	4	12.3	0.08	46.95	479	7	25	22	87	7.15	27.6	1.3	18	7	Validation Cohor	Non-postoperative group	Malignant tumor	Hypertension	Non-Diabetes	Non-Chronic cardiac insufficiency	Non-Chronic liver disease	Non-Chronic renal insufficiency
1294	male	56	9932.58	20021.5			survival	4	3.8	1.4	79.32	3868	7	22	9.2	131	16.26	145.4	0.8	18	7	Validation Cohor	Non-postoperative group	Physical disease	Nonhypertension	Non-Diabetes	Non-Chronic cardiac insufficiency	Non-Chronic liver disease	Chronic renal insufficiency
1295	male	70	11394				survival	3	9.3	0.69	91.74	10913	7	37	12.9	130	12.05	35.5	2	21	9	Validation Cohor	Non-postoperative group	Physical disease	Nonhypertension	Non-Diabetes	Non-Chronic cardiac insufficiency	Non-Chronic liver disease	Non-Chronic renal insufficiency
1296	male	59	24916.1	16237.6			Death	5	4.8	200	71.04	10458	7	89	46	91	7.57	27	1.8	18	7	Validation Cohor	Non-postoperative group	Malignant tumor	Nonhypertension	Diabetes	Non-Chronic cardiac insufficiency	Chronic liver disease	Chronic renal insufficiency
1297	male	50	7112.73				survival	3	12.4	0.05	0.5	32	42	41	30.4	72	12.56	44.9	1.6	18	7	Validation Cohor	Non-postoperative group	Physical disease	Nonhypertension	Non-Diabetes	Chronic cardiac insufficiency	Non-Chronic liver disease	Non-Chronic renal insufficiency
1298	female	58	6706.41				survival	2	7.6	0.05	12.72	176	33	23	16.6	45	12.56	31	0.8	13	4	Validation Cohor	Non-postoperative group	Physical disease	Nonhypertension	Diabetes	Chronic cardiac insufficiency	Non-Chronic liver disease	Non-Chronic renal insufficiency
1299	female	48	4770.57				survival	2	9.5	0.2	136.47	1101	11	25	13.3	51	12.56	31.1	2.53	16	4	Validation Cohor	Non-postoperative group	Physical disease	Nonhypertension	Non-Diabetes	Non-Chronic cardiac insufficiency	Non-Chronic liver disease	Non-Chronic renal insufficiency
1300	male	64	6461.25	4707.72			survival	6	13.2	28.17	43.67	2604	45	24	47.6	73	6.72	33.6	0.75	19	8	Validation Cohor	Non-postoperative group	Severe injury	Hypertension	Non-Diabetes	Chronic cardiac insufficiency	Non-Chronic liver disease	Non-Chronic renal insufficiency
1301	female	66	8829.69				survival	3	10.4	17.49	29.48	24032	7	15	9.8	613	16.36	53	0.6	25	0	Validation Cohor	Non-postoperative group	Severe injury	Nonhypertension	Non-Diabetes	Non-Chronic cardiac insufficiency	Non-Chronic liver disease	Chronic renal insufficiency
1302	male	71	7188.66	8819.85			survival	3	5	0.06	43.67	12456	7	16	7.6	217	20.24	180	0.4	18	7	Validation Cohor	Non-postoperative group	Physical disease	Hypertension	Diabetes	Chronic cardiac insufficiency	Non-Chronic liver disease	Chronic renal insufficiency
1303	male	56	3096.66	8616.27			survival	6	17.5	0.05	19.06	493	31	174	7.4	64	9.94	30.9	2.3	16	4	Validation Cohor	Non-postoperative group	Severe injury	Nonhypertension	Non-Diabetes	Non-Chronic cardiac insufficiency	Non-Chronic liver disease	Non-Chronic renal insufficiency
1304	male	70	7288.08				survival	4	10.2	0.05	18.28	3600	61	217	26.5	79	4.69	30	1.4	18	7	Validation Cohor	Non-postoperative group	Physical disease	Nonhypertension	Non-Diabetes	Non-Chronic cardiac insufficiency	Non-Chronic liver disease	Non-Chronic renal insufficiency
1305	male	46	7605.63				survival	3	16.7	0.09	1.33	38	10	44	35.2	102	12.56	30.8	3.2	7	10	Validation Cohor	Non-postoperative group	Physical disease	Hypertension	Non-Diabetes	Non-Chronic cardiac insufficiency	Non-Chronic liver disease	Non-Chronic renal insufficiency
1306	male	66	44433.9	34703.4			Death	6	13.4	0.05	0.72	1019	37	80	10.8	78	12.56	38.6	1.6	25	9	Validation Cohor	Non-postoperative group	Physical disease	Nonhypertension	Diabetes	Chronic cardiac insufficiency	Non-Chronic liver disease	Non-Chronic renal insufficiency
1307	female	63	7528.62	6201.27			survival	4	12.9	0.05	0.5	16172	28	50	3.7	225	15.87	31.3	1.5	21	8	Validation Cohor	Non-postoperative group	Physical disease	Nonhypertension	Diabetes	Non-Chronic cardiac insufficiency	Non-Chronic liver disease	Non-Chronic renal insufficiency
1308	male	47	8605.14	14122.6			survival	6	7.2	0.31	51.26	2440	7	19	4.8	417	20.27	40.3	0.4	11	6	Validation Cohor	Non-postoperative group	Physical disease	Nonhypertension	Non-Diabetes	Non-Chronic cardiac insufficiency	Non-Chronic liver disease	Chronic renal insufficiency
1309	male	78	5706.54	5042.49			survival	7	31	7.38	208.4	535	8	30	10.4	102	5.32	35.6	1.1	24	10	Validation Cohor	Non-postoperative group	Physical disease	Nonhypertension	Diabetes	Non-Chronic cardiac insufficiency	Non-Chronic liver disease	Non-Chronic renal insufficiency
1310	male	66	4840.68	4758.87			survival	4	7.9	0.18	28.82	133	7	3	16.4	79	7.49	31.1	2.3	18	7	Validation Cohor	Non-postoperative group	Physical disease	Hypertension	Non-Diabetes	Non-Chronic cardiac insufficiency	Non-Chronic liver disease	Non-Chronic renal insufficiency
1311	female	83	9843.6	9806.4			survival	4	12.4	0.07	33.83	1276	7	16	3.6	132	5.24	39.3	1.8	18	7	Validation Cohor	Non-postoperative group	Severe injury	Hypertension	Diabetes	Chronic cardiac insufficiency	Non-Chronic liver disease	Chronic renal insufficiency
1312	male	79	6232.98	9144.63			survival	4	22.6	0.45	43.67	803	9	60	22.9	52	10.47	32.7	2.1	18	7	Validation Cohor	Non-postoperative group	Malignant tumor	Nonhypertension	Non-Diabetes	Non-Chronic cardiac insufficiency	Non-Chronic liver disease	Non-Chronic renal insufficiency
1313	male	58	15472.6				Death	3	10.1	32.61	80	2003	47	248	100.6	282	24.14	44.1	1	18	7	Validation Cohor	Non-postoperative group	Physical disease	Nonhypertension	Non-Diabetes	Non-Chronic cardiac insufficiency	Non-Chronic liver disease	Non-Chronic renal insufficiency
1314	male	71	9630.03	12311.2			survival	4	6.5	0.91	95.02	4358	7	40	7	123	6.34	32.4	1.1	16	4	Validation Cohor	Non-postoperative group	Physical disease	Hypertension	Non-Diabetes	Non-Chronic cardiac insufficiency	Non-Chronic liver disease	Non-Chronic renal insufficiency
1315	male	23	5006.19				survival	3	9.3	0.16	161.64	123	7	14	16.2	75	2.78	35.2	0.4	1	0	Validation Cohor	Non-postoperative group	Physical disease	Nonhypertension	Diabetes	Non-Chronic cardiac insufficiency	Non-Chronic liver disease	Non-Chronic renal insufficiency
1316	female	68	10574.5				Death	3	14.5	27.88	338.8	460	28	106	27.2	85	7.19	34.7	3.2	18	7	Validation Cohor	Non-postoperative group	Physical disease	Nonhypertension	Non-Diabetes	Non-Chronic cardiac insufficiency	Chronic liver disease	Chronic renal insufficiency
1317	male	68	9497.22	12224.5			survival	7	14.1	0.05	83.77	831	14	24	14.8	120	5.91	31.3	1.1	10	5	Validation Cohor	Non-postoperative group	Physical disease	Nonhypertension	Non-Diabetes	Non-Chronic cardiac insufficiency	Non-Chronic liver disease	Non-Chronic renal insufficiency
1318	male	59	7204.47	8708.01			survival	4	10.1	1.49	125.65	312	10	43	22.5	80	6.05	28.5	1	20	2	Validation Cohor	Non-postoperative group	Severe injury	Nonhypertension	Non-Diabetes	Non-Chronic cardiac insufficiency	Non-Chronic liver disease	Non-Chronic renal insufficiency
1319	male	31	37140.3				Death	3	24.5	0.23	2.2	46	63	148	21.7	182	5.81	180	12.5	38	15	Validation Cohor	Non-postoperative group	Severe injury	Nonhypertension	Non-Diabetes	Non-Chronic cardiac insufficiency	Non-Chronic liver disease	Non-Chronic renal insufficiency
1320	female	54	28168.4				Death	2	15.3	68.69	97.85	20678	14	98	39.5	275	26.52	37.4	5.4	24	6	Validation Cohor	Non-postoperative group	Physical disease	Nonhypertension	Diabetes	Chronic cardiac insufficiency	Non-Chronic liver disease	Non-Chronic renal insufficiency
1321	female	67	9864.39				survival	2	4.6	0.1	43.67	1190	7	5	5.2	136	3.62	49.5	0.5	18	7	Validation Cohor	Non-postoperative group	Physical disease	Hypertension	Diabetes	Non-Chronic cardiac insufficiency	Non-Chronic liver disease	Chronic renal insufficiency
1322	female	66	12619.1				survival	3	16.5	13.87	48.39	1658	9	35	18.7	110	7.65	30.3	4.3	19	4	Validation Cohor	Non-postoperative group	Physical disease	Nonhypertension	Non-Diabetes	Non-Chronic cardiac insufficiency	Non-Chronic liver disease	Chronic renal insufficiency
1323	male	54	13170.6				Death	3	13.4	6.48	34.57	1191	14	81	35.7	131	14.62	33.7	2.3	18	7	Validation Cohor	Non-postoperative group	Physical disease	Nonhypertension	Non-Diabetes	Chronic cardiac insufficiency	Non-Chronic liver disease	Non-Chronic renal insufficiency
1324	male	59	18365.6	12182.9			survival	4	8.4	14.46	129.8	485	11	21	11.3	189	14.69	39.5	5.36	12	1	Validation Cohor	Non-postoperative group	Physical disease	Hypertension	Non-Diabetes	Non-Chronic cardiac insufficiency	Non-Chronic liver disease	Chronic renal insufficiency
1325	female	71	17401.1	16291.1			Death	7	19.1	200	80	5952	55	167	64	456	21.87	73.7	3.17	25	14	Validation Cohor	Non-postoperative group	Physical disease	Nonhypertension	Non-Diabetes	Non-Chronic cardiac insufficiency	Non-Chronic liver disease	Non-Chronic renal insufficiency
1326	male	52	5708.79				Death	3	23.1	5.88	214.28	25000	7	13	6.1	382	26.62	31.4	1.4	21	12	Validation Cohor	Non-postoperative group	Physical disease	Hypertension	Diabetes	Non-Chronic cardiac insufficiency	Non-Chronic liver disease	Chronic renal insufficiency
1327	male	61	7221.87				survival	7	10.6	0.05	43.67	244	31	40	16.7	702	43.26	49.1	1.4	18	0	Validation Cohor	Non-postoperative group	Physical disease	Hypertension	Non-Diabetes	Non-Chronic cardiac insufficiency	Non-Chronic liver disease	Chronic renal insufficiency
1328	male	45	12487.9				Death	5	8.1	1.65	80	871	15	17	8.1	68	4.3	30.7	3	31	14	Validation Cohor	Non-postoperative group	Other	Nonhypertension	Non-Diabetes	Non-Chronic cardiac insufficiency	Non-Chronic liver disease	Non-Chronic renal insufficiency
1329	female	80	4527.48	6193.77			survival	4	23.3	0.05	150.16	57	7	23	10.8	103	6.37	29.2	2	10	8	Validation Cohor	Non-postoperative group	Physical disease	Nonhypertension	Non-Diabetes	Non-Chronic cardiac insufficiency	Non-Chronic liver disease	Non-Chronic renal insufficiency
1330	male	77	3221.85				survival	3	10.4	0.07	43.67	1929	7	25	8.9	322	18.3	180	1	21	0	Validation Cohor	Non-postoperative group	Physical disease	Hypertension	Non-Diabetes	Non-Chronic cardiac insufficiency	Non-Chronic liver disease	Chronic renal insufficiency
1331	male	38	2966.16				survival	3	9.1	0.41	43.67	1086	22	24	4.6	84	3.41	26.3	0.63	7	0	Validation Cohor	Non-postoperative group	Severe injury	Nonhypertension	Non-Diabetes	Non-Chronic cardiac insufficiency	Non-Chronic liver disease	Non-Chronic renal insufficiency
1332	female	81	4033.02	3139.05			Death	7	10.1	2.25	71.53	2607	54	30	16.2	78	5.57	34.3	0.55	29	13	Validation Cohor	Non-postoperative group	Physical disease	Hypertension	Diabetes	Non-Chronic cardiac insufficiency	Non-Chronic liver disease	Non-Chronic renal insufficiency
1333	male	78	15890.2				Death	2	8.4	48.14	80	14602	7	19	25.2	261	10.93	34.2	1.4	27	6	Validation Cohor	Non-postoperative group	Severe injury	Nonhypertension	Diabetes	Non-Chronic cardiac insufficiency	Non-Chronic liver disease	Non-Chronic renal insufficiency
1334	male	69	7641.96	6962.16			survival	5	16.2	0.36	36.16	175	1061	1727	73.5	93	8.3	35.4	2.8	18	7	Validation Cohor	Non-postoperative group	Malignant tumor	Hypertension	Non-Diabetes	Non-Chronic cardiac insufficiency	Chronic liver disease	Non-Chronic renal insufficiency
1335	male	48	5045.1	4572.51			survival	6	2.7	2.67	34.18	54	226	705	74.7	75	5.98	50.3	0.8	19	8	Validation Cohor	Non-postoperative group	Physical disease	Nonhypertension	Non-Diabetes	Non-Chronic cardiac insufficiency	Chronic liver disease	Non-Chronic renal insufficiency
1336	male	66	8724.66	10784.6			Death	4	14.9	0.21	1.62	740	7	40	24.8	64	12.56	35.4	9	17	11	Validation Cohor	Non-postoperative group	Physical disease	Nonhypertension	Non-Diabetes	Chronic cardiac insufficiency	Non-Chronic liver disease	Non-Chronic renal insufficiency
1337	male	50	19928.2				survival	3	19.9	0.05	1.32	315	41	94	9.8	125	12.56	32.7	1.2	7	5	Validation Cohor	Non-postoperative group	Physical disease	Hypertension	Non-Diabetes	Non-Chronic cardiac insufficiency	Non-Chronic liver disease	Chronic renal insufficiency
1338	male	46	3563.04	4688.28			survival	7	15.4	0.05	24.59	157	7	19	11.9	69	5.35	161.3	1.2	27	4	Validation Cohor	Non-postoperative group	Severe injury	Nonhypertension	Non-Diabetes	Non-Chronic cardiac insufficiency	Non-Chronic liver disease	Chronic renal insufficiency
1339	female	60	12101.3				survival	3	17.7	0.05	70.03	53	29	23	9.6	62	12.56	32.2	3	6	3	Validation Cohor	Non-postoperative group	Physical disease	Hypertension	Diabetes	Non-Chronic cardiac insufficiency	Non-Chronic liver disease	Non-Chronic renal insufficiency
1340	female	75	2546.79	7297.98			Death	4	10.5	0.05	13.38	20798	7	40	8.2	327	14.9	102.2	0.8	26	9	Validation Cohor	Non-postoperative group	Physical disease	Nonhypertension	Non-Diabetes	Chronic cardiac insufficiency	Non-Chronic liver disease	Chronic renal insufficiency
1341	male	75	5271.96				survival	5	7.8	0.38	127.55	446	19	63	17.9	88	6.42	36.1	0.33	18	4	Validation Cohor	Non-postoperative group	Physical disease	Hypertension	Non-Diabetes	Chronic cardiac insufficiency	Chronic liver disease	Chronic renal insufficiency
1342	male	49	8664.18	7046.31			survival	5	8.3	23.1	269.32	314	90	170	56	707	34.69	38.7	1.4	18	9	Validation Cohor	Non-postoperative group	Physical disease	Nonhypertension	Non-Diabetes	Non-Chronic cardiac insufficiency	Chronic liver disease	Chronic renal insufficiency
1343	male	77	13328.9	14350.7			Death	6	12.2	0.9	80	20109	12	79	10.5	109	14.01	36.8	1	24	11	Validation Cohor	Non-postoperative group	Physical disease	Nonhypertension	Non-Diabetes	Chronic cardiac insufficiency	Non-Chronic liver disease	Non-Chronic renal insufficiency
1344	male	58	4473	2887.02			survival	4	12.9	0.05	64.34	33	7	27	13.7	93	12.56	33.9	1.9	18	7	Validation Cohor	Non-postoperative group	Physical disease	Hypertension	Non-Diabetes	Non-Chronic cardiac insufficiency	Non-Chronic liver disease	Non-Chronic renal insufficiency
1345	male	73	4058.76	9453.27			survival	4	13.9	0.05	5.37	641	14	134	10.1	96	8.51	30.1	1.1	18	7	Validation Cohor	Non-postoperative group	Physical disease	Nonhypertension	Non-Diabetes	Non-Chronic cardiac insufficiency	Non-Chronic liver disease	Non-Chronic renal insufficiency
1346	female	48	7005.24	6084.72			survival	6	8.2	0.35	34	764	21	38	12.6	275	7.81	31.6	2.7	20	9	Validation Cohor	Non-postoperative group	Physical disease	Hypertension	Non-Diabetes	Chronic cardiac insufficiency	Non-Chronic liver disease	Chronic renal insufficiency
1347	female	60	3451.86	2941.2			survival	5	17.5	0.05	58.93	407	7	16	18.4	49	2.94	30	1.3	27	6	Validation Cohor	Non-postoperative group	Other	Nonhypertension	Non-Diabetes	Non-Chronic cardiac insufficiency	Non-Chronic liver disease	Non-Chronic renal insufficiency
1348	male	51	16742.2				Death	3	3.9	112.52	224.72	10901	22	148	18.4	460	32.57	27.5	1.3	30	17	Validation Cohor	Non-postoperative group	Physical disease	Nonhypertension	Non-Diabetes	Chronic cardiac insufficiency	Chronic liver disease	Chronic renal insufficiency
1349	female	73	8268.42	8741.31			survival	4	6.5	105.69	81.57	17854	142	293	87.4	152	10.64	42.5	5.4	16	9	Validation Cohor	Non-postoperative group	Physical disease	Nonhypertension	Non-Diabetes	Chronic cardiac insufficiency	Non-Chronic liver disease	Chronic renal insufficiency
1350	female	68	3558.03				survival	2	11.7	0.05	43.67	148	7	17	11.9	91	4.45	35.1	2.7	18	7	Validation Cohor	Non-postoperative group	Physical disease	Hypertension	Non-Diabetes	Non-Chronic cardiac insufficiency	Non-Chronic liver disease	Non-Chronic renal insufficiency
1351	male	55	5084.37	5775.75			survival	5	7.6	0.05	8.96	19	23	28	20.8	68	3.8	27.9	1.9	18	2	Validation Cohor	Non-postoperative group	Physical disease	Nonhypertension	Non-Diabetes	Non-Chronic cardiac insufficiency	Chronic liver disease	Non-Chronic renal insufficiency
1352	female	45	4126.86				survival	4	22.2	0.05	0.5	37	125	190	9	49	4.71	32.7	1	17	0	Validation Cohor	Non-postoperative group	Severe injury	Nonhypertension	Non-Diabetes	Non-Chronic cardiac insufficiency	Non-Chronic liver disease	Non-Chronic renal insufficiency
1353	female	83	38259.9				Death	2	3.4	38.73	11.28	769	11	51	15.7	189	6.63	27.2	15	22	7	Validation Cohor	Non-postoperative group	Physical disease	Nonhypertension	Non-Diabetes	Non-Chronic cardiac insufficiency	Non-Chronic liver disease	Non-Chronic renal insufficiency
1354	male	63	8948.73				survival	3	8.6	0.05	146.09	27	7	13	13.8	69	12.56	33.1	1.4	9	1	Validation Cohor	Non-postoperative group	Physical disease	Hypertension	Diabetes	Non-Chronic cardiac insufficiency	Non-Chronic liver disease	Non-Chronic renal insufficiency
1355	female	23	6262.83				survival	9	15.7	0.05	10.18	44	7	13	8.1	48	5.98	30	1.5	19	4	Validation Cohor	Non-postoperative group	Physical disease	Nonhypertension	Non-Diabetes	Non-Chronic cardiac insufficiency	Non-Chronic liver disease	Non-Chronic renal insufficiency
1356	female	70	55761.9				Death	3	9.3	200	202.92	4386	9	54	22.2	318	15.38	41.1	1.3	37	14	Validation Cohor	Non-postoperative group	Physical disease	Hypertension	Diabetes	Non-Chronic cardiac insufficiency	Non-Chronic liver disease	Chronic renal insufficiency
1357	male	51	18177.2				Death	2	23.8	152.86	232.51	11009	32	112	160.1	418	24.09	36.9	4.6	18	7	Validation Cohor	Non-postoperative group	Physical disease	Nonhypertension	Non-Diabetes	Non-Chronic cardiac insufficiency	Non-Chronic liver disease	Non-Chronic renal insufficiency
1358	male	60	3627.15	5704.95			survival	4	10.6	0.05	11.94	2355	42	39	7.8	56	12.56	36.9	0.4	18	7	Validation Cohor	Non-postoperative group	Physical disease	Nonhypertension	Non-Diabetes	Chronic cardiac insufficiency	Non-Chronic liver disease	Non-Chronic renal insufficiency
1359	male	66	9820.86				survival	2	9	0.23	43.67	898	7	27	16.9	64	3.79	30.8	0.9	18	7	Validation Cohor	Non-postoperative group	Severe injury	Hypertension	Non-Diabetes	Non-Chronic cardiac insufficiency	Non-Chronic liver disease	Non-Chronic renal insufficiency
1360	male	69	9246.45				Death	3	25.9	575	88.19	2028	573	1306	49.1	149	8.19	27.2	7.8	31	11	Validation Cohor	Non-postoperative group	Physical disease	Nonhypertension	Diabetes	Non-Chronic cardiac insufficiency	Chronic liver disease	Chronic renal insufficiency
1361	female	79	3326.58	3856.5			survival	5	6.7	0.05	43.67	4495	23	46	10.3	34	5.5	45.4	1.1	23	7	Validation Cohor	Non-postoperative group	Physical disease	Nonhypertension	Non-Diabetes	Non-Chronic cardiac insufficiency	Non-Chronic liver disease	Non-Chronic renal insufficiency
1362	male	66	3957.66				survival	2	16.7	0.08	224.97	211	7	23	11.3	80	6.25	35.8	1.7	16	8	Validation Cohor	Non-postoperative group	Physical disease	Hypertension	Non-Diabetes	Non-Chronic cardiac insufficiency	Non-Chronic liver disease	Non-Chronic renal insufficiency
1363	female	50	4363.98	2915.76			Death	5	30.7	3.63	16.91	1023	14	14	9	97	6.57	36.3	2.4	30	11	Validation Cohor	Non-postoperative group	Physical disease	Nonhypertension	Non-Diabetes	Non-Chronic cardiac insufficiency	Non-Chronic liver disease	Non-Chronic renal insufficiency
1364	male	66	11855.2	13636.1			survival	6	17.6	0.11	87.46	101	23	28	18.9	80	12.56	30.1	1.3	22	6	Validation Cohor	Non-postoperative group	Physical disease	Nonhypertension	Diabetes	Non-Chronic cardiac insufficiency	Non-Chronic liver disease	Non-Chronic renal insufficiency
1365	female	62	24579.3	8880.15			Death	7	14.6	0.05	32.3	356	7	68	14.3	201	12.8	32	4.2	18	14	Validation Cohor	Non-postoperative group	Physical disease	Nonhypertension	Non-Diabetes	Chronic cardiac insufficiency	Non-Chronic liver disease	Non-Chronic renal insufficiency
1366	female	56	12899.6				Death	2	0.5	0.57	173.54	5525	23	29	22.2	100	7.55	180	3.5	18	7	Validation Cohor	Non-postoperative group	Physical disease	Nonhypertension	Non-Diabetes	Non-Chronic cardiac insufficiency	Non-Chronic liver disease	Non-Chronic renal insufficiency
1367	female	79	7245.21				survival	6	5.8	0.07	5.13	5839	7	22	9.7	466	24.32	26.3	0.9	25	4	Validation Cohor	Non-postoperative group	Malignant tumor	Nonhypertension	Non-Diabetes	Non-Chronic cardiac insufficiency	Non-Chronic liver disease	Chronic renal insufficiency
1368	male	64	8978.76				survival	2	53.4	2.6	2.78	1771	10	22	4.5	241	34.65	46.4	0.7	18	7	Validation Cohor	Non-postoperative group	Severe injury	Nonhypertension	Non-Diabetes	Non-Chronic cardiac insufficiency	Non-Chronic liver disease	Non-Chronic renal insufficiency
1369	male	57	4712.19				Death	2	17.2	0.22	0.7	331	11	41	8.5	146	6.78	29.7	1.9	18	7	Validation Cohor	Non-postoperative group	Severe injury	Nonhypertension	Non-Diabetes	Non-Chronic cardiac insufficiency	Non-Chronic liver disease	Non-Chronic renal insufficiency
1370	male	63	6265.32	5234.52			Death	7	3.6	8.25	80	832	7	16	26.8	72	6.46	41.1	0.5	20	12	Validation Cohor	Non-postoperative group	Other	Hypertension	Non-Diabetes	Non-Chronic cardiac insufficiency	Non-Chronic liver disease	Non-Chronic renal insufficiency
1371	male	56	13102.2	14284.4			survival	9	8.2	4.12	43.67	11770	27	139	11.2	444	15.53	30.5	1.82	18	7	Validation Cohor	Non-postoperative group	Severe injury	Nonhypertension	Non-Diabetes	Non-Chronic cardiac insufficiency	Non-Chronic liver disease	Chronic renal insufficiency
1372	male	45	8428.92				survival	2	11.1	0.07	2	21	94	47	14.6	84	12.56	31.9	2.1	18	7	Validation Cohor	Non-postoperative group	Physical disease	Nonhypertension	Non-Diabetes	Chronic cardiac insufficiency	Non-Chronic liver disease	Non-Chronic renal insufficiency
1373	male	58	8775.33				survival	2	14.8	0.05	2.3	918	7	16	15.7	86	8.31	58.5	1.8	18	7	Validation Cohor	Non-postoperative group	Physical disease	Hypertension	Non-Diabetes	Non-Chronic cardiac insufficiency	Non-Chronic liver disease	Non-Chronic renal insufficiency
1374	male	71	14287.4				Death	2	14.2	2.16	35.29	3810	7	19	7.3	1012	46.49	85	1.1	21	13	Validation Cohor	Non-postoperative group	Physical disease	Hypertension	Diabetes	Non-Chronic cardiac insufficiency	Non-Chronic liver disease	Chronic renal insufficiency
1375	female	18	6380.4	4613.88			survival	5	10.6	0.05	6.15	2164	7	15	4.6	174	15.33	26	1.4	17	5	Validation Cohor	Non-postoperative group	Physical disease	Nonhypertension	Diabetes	Non-Chronic cardiac insufficiency	Non-Chronic liver disease	Chronic renal insufficiency
1376	female	69	7592.73	7541.28			survival	2	17.4	37.64	43.67	1561	12	27	31.5	160	8.57	60.4	0.7	18	7	Validation Cohor	Non-postoperative group	Physical disease	Hypertension	Non-Diabetes	Non-Chronic cardiac insufficiency	Non-Chronic liver disease	Non-Chronic renal insufficiency
1377	male	70	6425.67				survival	2	12	0.09	0.5	401	21	21	14.5	234	5.91	25.2	1.5	18	7	Validation Cohor	Non-postoperative group	Severe injury	Hypertension	Non-Diabetes	Non-Chronic cardiac insufficiency	Non-Chronic liver disease	Non-Chronic renal insufficiency
1378	female	65	3302.55	4151.76			survival	4	4.6	0.05	4	121	7	14	10.3	63	3.15	27.4	0.6	17	7	Validation Cohor	Non-postoperative group	Physical disease	Nonhypertension	Non-Diabetes	Non-Chronic cardiac insufficiency	Non-Chronic liver disease	Non-Chronic renal insufficiency
1379	female	75	17259.3				survival	2	8.3	0.28	3.33	2259	7	19	25.7	89	5.02	25.3	8.8	18	7	Validation Cohor	Non-postoperative group	Other	Nonhypertension	Non-Diabetes	Non-Chronic cardiac insufficiency	Non-Chronic liver disease	Non-Chronic renal insufficiency
1380	male	61	14001.1				survival	2	12.9	10.08	31.88	573	14	37	90.7	74	14.54	43.3	5.5	23	10	Validation Cohor	Non-postoperative group	Severe injury	Nonhypertension	Non-Diabetes	Non-Chronic cardiac insufficiency	Non-Chronic liver disease	Non-Chronic renal insufficiency
1381	male	65	9597.57				Death	2	12.7	36.97	84.17	1964	7	19	58.4	318	20.88	33.4	2	31	17	Validation Cohor	Non-postoperative group	Malignant tumor	Nonhypertension	Non-Diabetes	Non-Chronic cardiac insufficiency	Non-Chronic liver disease	Non-Chronic renal insufficiency
1382	female	63	4630.86	4375.71			survival	4	27.3	0.08	131.58	372	8	13	13.5	66	5.03	26.3	0.81	13	4	Validation Cohor	Non-postoperative group	Physical disease	Nonhypertension	Non-Diabetes	Non-Chronic cardiac insufficiency	Non-Chronic liver disease	Non-Chronic renal insufficiency
1383	male	59	18730.9				survival	9	6.4	2.35	95.64	25000	9	74	7.7	427	26.58	44.7	1.67	22	7	Validation Cohor	Non-postoperative group	Physical disease	Nonhypertension	Non-Diabetes	Non-Chronic cardiac insufficiency	Non-Chronic liver disease	Non-Chronic renal insufficiency
1384	male	70	13006.7				Death	4	17	0.05	1.6	49	10	40	54.7	100	10.71	40.7	3.5	32	15	Validation Cohor	Non-postoperative group	Severe injury	Nonhypertension	Non-Diabetes	Non-Chronic cardiac insufficiency	Chronic liver disease	Non-Chronic renal insufficiency
1385	male	67	3046.26				survival	2	19.1	0.05	2.3	383	7	23	2.5	91	13.06	28.3	1	18	7	Validation Cohor	Non-postoperative group	Other	Nonhypertension	Non-Diabetes	Non-Chronic cardiac insufficiency	Non-Chronic liver disease	Non-Chronic renal insufficiency
1386	male	52	7436.28				survival	2	12.9	0.05	10.09	127	81	102	29.5	82	12.56	34	1.4	18	7	Validation Cohor	Non-postoperative group	Physical disease	Hypertension	Diabetes	Chronic cardiac insufficiency	Non-Chronic liver disease	Non-Chronic renal insufficiency
1387	female	54	10495.2				Death	3	9.9	0.05	0.96	646	7	52	39.3	76	12.56	33.9	3.2	13	13	Validation Cohor	Non-postoperative group	Physical disease	Nonhypertension	Non-Diabetes	Chronic cardiac insufficiency	Non-Chronic liver disease	Non-Chronic renal insufficiency
1388	female	80	19767.3				Death	2	7.6	13	80	8867	316	937	17.1	328	33.62	52.6	2.3	18	7	Validation Cohor	Non-postoperative group	Physical disease	Nonhypertension	Non-Diabetes	Non-Chronic cardiac insufficiency	Chronic liver disease	Chronic renal insufficiency
1389	female	71	8281.29	10834.4			Death	3	6.4	0.05	15.59	1798	7	14	5.6	112	5.33	34.2	1.3	18	7	Validation Cohor	Non-postoperative group	Severe injury	Hypertension	Diabetes	Non-Chronic cardiac insufficiency	Non-Chronic liver disease	Non-Chronic renal insufficiency
1390	male	83	9726.48	12885.5			Death	12	10.7	1.02	83.08	3969	7	22	36.2	99	10.41	133	2.2	29	12	Validation Cohor	Non-postoperative group	Physical disease	Hypertension	Diabetes	Non-Chronic cardiac insufficiency	Non-Chronic liver disease	Non-Chronic renal insufficiency
1391	female	27	5329.5	7550.55			survival	6	7.9	0.22	12.21	25000	45	24	17.1	100	14.33	75.6	1.5	17	6	Validation Cohor	Non-postoperative group	Physical disease	Nonhypertension	Non-Diabetes	Chronic cardiac insufficiency	Chronic liver disease	Chronic renal insufficiency
1392	male	65	3851.97	6039.21			survival	7	7.9	0.05	9.09	85	7	13	16	89	4.9	28.5	1.6	9	7	Validation Cohor	Non-postoperative group	Physical disease	Nonhypertension	Non-Diabetes	Non-Chronic cardiac insufficiency	Non-Chronic liver disease	Non-Chronic renal insufficiency
1393	female	49	4273.71	4772.64			survival	5	12.2	0.09	40.06	2735	20	19	19.6	66	4	27.3	2.4	18	7	Validation Cohor	Non-postoperative group	Physical disease	Nonhypertension	Non-Diabetes	Chronic cardiac insufficiency	Non-Chronic liver disease	Non-Chronic renal insufficiency
1394	female	56	4888.35				survival	5	8	32.77	74.92	1209	14	24	13.9	51	2.59	26.6	1.3	22	8	Validation Cohor	Non-postoperative group	Physical disease	Nonhypertension	Diabetes	Non-Chronic cardiac insufficiency	Non-Chronic liver disease	Non-Chronic renal insufficiency
1395	male	57	11325.5				Death	3	11.2	0.13	27.69	2646	13	345	10.2	256	12.61	29	8.2	31	15	Validation Cohor	Non-postoperative group	Physical disease	Nonhypertension	Non-Diabetes	Non-Chronic cardiac insufficiency	Non-Chronic liver disease	Chronic renal insufficiency
1396	female	55	5695.2	5255.94			survival	7	0.8	0.61	94.12	17495	7	15	29.2	51	7.76	40.7	0.9	22	6	Validation Cohor	Non-postoperative group	Malignant tumor	Nonhypertension	Non-Diabetes	Non-Chronic cardiac insufficiency	Non-Chronic liver disease	Non-Chronic renal insufficiency
1397	female	79	4992.96				survival	5	5.5	0.14	33.14	151	7	17	18.1	50	3.89	26.5	1.5	25	10	Validation Cohor	Non-postoperative group	Physical disease	Nonhypertension	Diabetes	Non-Chronic cardiac insufficiency	Non-Chronic liver disease	Non-Chronic renal insufficiency
1398	male	81	14562.2				Death	2	24.8	0.13	1.39	260	9	20	9.1	135	13.73	26.2	5.1	18	7	Validation Cohor	Non-postoperative group	Malignant tumor	Nonhypertension	Non-Diabetes	Non-Chronic cardiac insufficiency	Non-Chronic liver disease	Non-Chronic renal insufficiency
1399	male	58	27256.1				survival	6	22.3	1.11	37.36	57	58	53	295.6	264	9.14	35.6	0.7	24	6	Validation Cohor	Non-postoperative group	Physical disease	Nonhypertension	Non-Diabetes	Non-Chronic cardiac insufficiency	Non-Chronic liver disease	Chronic renal insufficiency
1400	female	72	5440.68				survival	2	20.9	5.37	141.44	313	7	15	10	119	12.56	34.2	2.5	21	5	Validation Cohor	Non-postoperative group	Physical disease	Nonhypertension	Non-Diabetes	Non-Chronic cardiac insufficiency	Non-Chronic liver disease	Non-Chronic renal insufficiency
1401	female	63	2930.88	3795.39			survival	4	15.6	0.14	84.56	371	7	26	5.6	197	67	32.4	1.1	26	8	Validation Cohor	Non-postoperative group	Other	Nonhypertension	Non-Diabetes	Non-Chronic cardiac insufficiency	Non-Chronic liver disease	Non-Chronic renal insufficiency
1402	female	73	4252.62	5036.73			Death	21	14.4	6.04	68.53	282	52	60	26.7	98	8.98	26.8	0.9	25	11	Validation Cohor	Non-postoperative group	Severe injury	Hypertension	Non-Diabetes	Non-Chronic cardiac insufficiency	Non-Chronic liver disease	Non-Chronic renal insufficiency
1403	male	48	12691.1				Death	3	6.5	0.51	9.92	145	237	135	161.7	145	8.58	39.2	9.4	12	5	Validation Cohor	Non-postoperative group	Physical disease	Hypertension	Diabetes	Non-Chronic cardiac insufficiency	Chronic liver disease	Non-Chronic renal insufficiency
1404	male	54	7086.33				Death	2	11.5	12.08	119.16	9883	70	295	13.2	1334	72.91	30.7	3.3	36	11	Validation Cohor	Non-postoperative group	Malignant tumor	Nonhypertension	Non-Diabetes	Chronic cardiac insufficiency	Non-Chronic liver disease	Non-Chronic renal insufficiency
1405	male	50	4429.11				survival	2	14	0.15	52.43	152	12	29	19.2	84	12.56	32.5	1.5	8	5	Validation Cohor	Non-postoperative group	Physical disease	Nonhypertension	Non-Diabetes	Chronic cardiac insufficiency	Non-Chronic liver disease	Non-Chronic renal insufficiency
1406	male	55	5688.81				survival	2	16.5	12.23	86.13	732	97	201	56.7	92	12.56	40.5	1.09	18	7	Validation Cohor	Non-postoperative group	Physical disease	Nonhypertension	Diabetes	Non-Chronic cardiac insufficiency	Non-Chronic liver disease	Non-Chronic renal insufficiency
1407	female	72	22485.1	15662.9			survival	7	7.6	0.2	14.77	10539	8	20	22.7	108	12.48	27.9	3.9	13	6	Validation Cohor	Non-postoperative group	Severe injury	Hypertension	Diabetes	Chronic cardiac insufficiency	Non-Chronic liver disease	Non-Chronic renal insufficiency
1408	male	55	2517.78				survival	2	18.9	0.06	62.11	346	7	33	11.1	95	6.14	24.8	3.1	28	3	Validation Cohor	Non-postoperative group	Severe injury	Nonhypertension	Non-Diabetes	Non-Chronic cardiac insufficiency	Non-Chronic liver disease	Non-Chronic renal insufficiency
1409	female	73	3584.67				survival	3	7.9	0.05	0.96	2707	15	28	27.8	47	3.83	29.7	1.1	23	9	Validation Cohor	Non-postoperative group	Physical disease	Nonhypertension	Non-Diabetes	Non-Chronic cardiac insufficiency	Non-Chronic liver disease	Non-Chronic renal insufficiency
1410	female	70	3525.84	4418.22			Death	5	8.1	22.06	93.26	792	8	35	22.7	52	4.32	31.6	0.8	23	14	Validation Cohor	Non-postoperative group	Physical disease	Hypertension	Non-Diabetes	Chronic cardiac insufficiency	Non-Chronic liver disease	Non-Chronic renal insufficiency
1411	male	76	3836.46	8691.81			survival	7	15.1	124.74	91.97	2787	71	292	11.2	345	29.29	32.9	2.3	25	8	Validation Cohor	Non-postoperative group	Physical disease	Nonhypertension	Non-Diabetes	Chronic cardiac insufficiency	Chronic liver disease	Chronic renal insufficiency
1412	male	52	3238.5				survival	2	10.4	6.73	146.75	578	100	137	23.5	113	10.57	52.1	0.9	18	7	Validation Cohor	Non-postoperative group	Other	Nonhypertension	Non-Diabetes	Non-Chronic cardiac insufficiency	Non-Chronic liver disease	Non-Chronic renal insufficiency
1413	male	67	4781.4	5736.66			survival	8	11.8	0.16	43.67	3019	48	20	52.9	120	12.65	38.4	0.9	21	10	Validation Cohor	Non-postoperative group	Physical disease	Nonhypertension	Non-Diabetes	Non-Chronic cardiac insufficiency	Non-Chronic liver disease	Non-Chronic renal insufficiency
1414	male	64	2402.25				Death	2	10.2	0.05	80	101	7	6	15.8	75	6.05	33.1	1.3	21	12	Validation Cohor	Non-postoperative group	Physical disease	Nonhypertension	Diabetes	Non-Chronic cardiac insufficiency	Non-Chronic liver disease	Non-Chronic renal insufficiency
1415	male	76	32074.2				Death	2	10.4	0.08	94.31	540	7	30	39.6	95	3.04	33.7	10.8	28	13	Validation Cohor	Non-postoperative group	Physical disease	Nonhypertension	Non-Diabetes	Non-Chronic cardiac insufficiency	Non-Chronic liver disease	Non-Chronic renal insufficiency
1416	female	79	5346.6				survival	5	8.3	0.07	0.61	512	81	105	9.7	94	10.32	28.3	1.7	26	3	Validation Cohor	Non-postoperative group	Physical disease	Hypertension	Non-Diabetes	Chronic cardiac insufficiency	Non-Chronic liver disease	Chronic renal insufficiency
1417	female	54	5390.34				survival	3	13.7	0.71	277	500	23	35	22.7	124	5.79	30.3	0.7	27	8	Validation Cohor	Non-postoperative group	Physical disease	Hypertension	Non-Diabetes	Non-Chronic cardiac insufficiency	Non-Chronic liver disease	Non-Chronic renal insufficiency
1418	male	67	9806.22				survival	2	26.4	4.91	92.26	7098	7	15	5	708	12.56	33.9	1.2	18	7	Validation Cohor	Non-postoperative group	Severe injury	Hypertension	Diabetes	Non-Chronic cardiac insufficiency	Non-Chronic liver disease	Chronic renal insufficiency
1419	male	59	8026.74				survival	2	13.2	0.05	1.27	43	23	57	19	96	5.01	50.2	2.8	18	7	Validation Cohor	Non-postoperative group	Physical disease	Nonhypertension	Non-Diabetes	Non-Chronic cardiac insufficiency	Non-Chronic liver disease	Non-Chronic renal insufficiency
1420	male	59	14180.8				Death	3	5.2	10.82	151.56	714	7	54	103.2	150	7.63	36	2.1	18	7	Validation Cohor	Non-postoperative group	Physical disease	Nonhypertension	Non-Diabetes	Non-Chronic cardiac insufficiency	Chronic liver disease	Non-Chronic renal insufficiency
1421	male	65	3292.86				survival	1	14.3	0.05	4.93	90	10	18	7.5	86	4.45	26.3	2.5	25	8	Validation Cohor	Non-postoperative group	Severe injury	Hypertension	Non-Diabetes	Non-Chronic cardiac insufficiency	Non-Chronic liver disease	Non-Chronic renal insufficiency
1422	female	43	10349.2	7993.05			survival	8	38.8	3.22	164.13	15838	22	35	30.6	166	8.52	33.8	2.3	11	13	Validation Cohor	Non-postoperative group	Physical disease	Nonhypertension	Diabetes	Non-Chronic cardiac insufficiency	Non-Chronic liver disease	Non-Chronic renal insufficiency
1423	female	69	5125.38				survival	1	13.2	0.22	42.84	404	17	13	17.3	184	12.56	28.3	2.5	12	5	Validation Cohor	Non-postoperative group	Physical disease	Nonhypertension	Non-Diabetes	Non-Chronic cardiac insufficiency	Non-Chronic liver disease	Non-Chronic renal insufficiency
1424	female	82	10352.7				Death	2	18.8	0.25	64.28	593	7	23	16.4	251	14.89	26.6	3.2	39	3	Validation Cohor	Non-postoperative group	Physical disease	Nonhypertension	Non-Diabetes	Non-Chronic cardiac insufficiency	Non-Chronic liver disease	Chronic renal insufficiency
1425	female	67	2278.86	3204.81			survival	3	4.9	0.13	1.58	1135	7	13	15.9	389	9.91	48.8	0.4	26	4	Validation Cohor	Non-postoperative group	Physical disease	Nonhypertension	Non-Diabetes	Non-Chronic cardiac insufficiency	Non-Chronic liver disease	Chronic renal insufficiency
1426	female	71	10144	8931.48			survival	7	8	0.15	59.35	4192	7	26	23.5	72	7.47	42.8	0.3	18	7	Validation Cohor	Non-postoperative group	Physical disease	Hypertension	Diabetes	Chronic cardiac insufficiency	Non-Chronic liver disease	Non-Chronic renal insufficiency
1427	male	68	2971.74				Death	2	3.4	12.19	100.66	382	1029	3630	217.7	425	20.38	82.2	4.7	40	23	Validation Cohor	Non-postoperative group	Severe injury	Hypertension	Non-Diabetes	Non-Chronic cardiac insufficiency	Chronic liver disease	Chronic renal insufficiency
1428	male	80	3051.24				Death	3	3.6	0.88	46.53	25000	7	18	22.8	360	11.7	43	1	40	13	Validation Cohor	Non-postoperative group	Physical disease	Hypertension	Diabetes	Non-Chronic cardiac insufficiency	Non-Chronic liver disease	Chronic renal insufficiency
1429	male	84	2262.78				survival	2	14.1	0.19	70.82	2656	13	13	6.2	167	12.56	26.3	1.22	18	2	Validation Cohor	Non-postoperative group	Physical disease	Nonhypertension	Non-Diabetes	Chronic cardiac insufficiency	Non-Chronic liver disease	Chronic renal insufficiency
1430	male	71	8822.37				Death	2	27.1	0.17	74.38	2221	259	541	35.2	234	16.88	34	3.7	26	14	Validation Cohor	Non-postoperative group	Physical disease	Nonhypertension	Diabetes	Chronic cardiac insufficiency	Non-Chronic liver disease	Chronic renal insufficiency
1431	male	52	5874.9				survival	2	12.73	30.08	110	365	64.92	117.69	29.62	154.1	12.56	38.7	0.9	25	8	Validation Cohor	Non-postoperative group	Physical disease	Nonhypertension	Non-Diabetes	Non-Chronic cardiac insufficiency	Non-Chronic liver disease	Non-Chronic renal insufficiency
1432	male	59	3137.22	3232.2			survival	5	11.9	0.05	15.53	114	22	42	18.4	50	6.04	30.6	1.6	13	7	Validation Cohor	Non-postoperative group	Severe injury	Nonhypertension	Non-Diabetes	Non-Chronic cardiac insufficiency	Non-Chronic liver disease	Non-Chronic renal insufficiency
1433	male	39	9198.27	9406.23			survival	6	10.1	2.02	43.67	948	15	35	16.2	135	15.66	39.8	0.5	12	2	Validation Cohor	Non-postoperative group	Physical disease	Nonhypertension	Non-Diabetes	Non-Chronic cardiac insufficiency	Non-Chronic liver disease	Non-Chronic renal insufficiency
1434	female	59	12431.9				survival	5	6.4	0.28	89.58	4338	7	23	10.8	32	8.36	46.5	0.7	20	4	Validation Cohor	Non-postoperative group	Malignant tumor	Nonhypertension	Diabetes	Non-Chronic cardiac insufficiency	Non-Chronic liver disease	Non-Chronic renal insufficiency
1435	male	49	5478.96				Death	2	14.7	2.31	43.28	226	272	1210	13.7	100	8.82	26.2	3.7	18	7	Validation Cohor	Non-postoperative group	Severe injury	Nonhypertension	Non-Diabetes	Non-Chronic cardiac insufficiency	Chronic liver disease	Non-Chronic renal insufficiency
1436	female	41	2633.31	1679.34			survival	4	7.4	0.05	14.14	174	24	29	15.7	47	2.7	29.8	0.9	18	7	Validation Cohor	Non-postoperative group	Physical disease	Nonhypertension	Non-Diabetes	Non-Chronic cardiac insufficiency	Non-Chronic liver disease	Non-Chronic renal insufficiency
1437	male	63	3476.88	9548.88			survival	5	11.9	0.05	0.5	137	7	13	13.1	32	2.23	180	0.6	28	7	Validation Cohor	Non-postoperative group	Physical disease	Nonhypertension	Non-Diabetes	Non-Chronic cardiac insufficiency	Non-Chronic liver disease	Non-Chronic renal insufficiency
1438	male	67	7121.67				Death	2	10.6	0.27	133.72	10745	23	106	22	90	7.22	18.6	1.3	37	11	Validation Cohor	Non-postoperative group	Severe injury	Hypertension	Non-Diabetes	Chronic cardiac insufficiency	Non-Chronic liver disease	Non-Chronic renal insufficiency
1439	male	52	7976.64				survival	3	5.4	6.73	43.67	10910	30	48	11.4	727	14.37	50.3	0.5	24	10	Validation Cohor	Non-postoperative group	Physical disease	Hypertension	Diabetes	Non-Chronic cardiac insufficiency	Non-Chronic liver disease	Chronic renal insufficiency
1440	male	53	7586.07	17211.2			Death	7	7.8	0.15	79.4	10560	7	33	15.5	456	12.56	40.3	2.1	11	12	Validation Cohor	Non-postoperative group	Physical disease	Hypertension	Diabetes	Chronic cardiac insufficiency	Non-Chronic liver disease	Non-Chronic renal insufficiency
1441	female	58	6767.28	4615.68			survival	4	10.3	16.74	52.41	167	18	34	16.7	44	6.41	31.3	2.3	22	9	Validation Cohor	Non-postoperative group	Physical disease	Nonhypertension	Non-Diabetes	Non-Chronic cardiac insufficiency	Non-Chronic liver disease	Non-Chronic renal insufficiency
[truncated: 532 more rows]
